# Supplementary material for: Stronger together for in-cell translation: natural and unnatural base modified mRNA
Source: Royal Society of Chemistry journal article supplement (doi:10.1039/d2sc00670g), 2022-01-01
Supplement: d2sc00670g1.pdf [file d2sc00670g1.pdf]

## Supporting Information

### *Stronger together for in cell translation: natural and unnatural base modified mRNA*

*Lisa Bornewasser, Christof Domnick and Stephanie Kath-Schorr\**

*Department of Chemistry, University of Cologne, Greinstrasse 4, 50939 Cologne, Germany.*

*E-mail: [skathsch@uni-koeln.de](mailto:skathsch@uni-koeln.de)*

## Supplementary Information

|                                                                                           |                                    |
|-------------------------------------------------------------------------------------------|------------------------------------|
| <b>General methods</b> .....                                                              | 2                                  |
| <b>Agarose gel electrophoresis</b> .....                                                  | 8                                  |
| <b>Nucleic acid concentration determination</b> .....                                     | 16                                 |
| <b>Microscopy data analysis</b> .....                                                     | 16                                 |
| <b>RT-qPCR analysis</b> .....                                                             | 26                                 |
| <b>Initial experiments for qPCR efficiencies in singleplex vs. multiplex assays</b> ..... | 66                                 |
| <b>mCherry protein quantification</b> .....                                               | 71                                 |
| <b>MT cell viability assay</b> .....                                                      | 91                                 |
| <b>Preparation of DNA primers, oligonucleotides and hydrolysis probes</b> .....           | 93                                 |
| <b>Preparation of dNaM-modified DNA primers and DNA oligonucleotides</b> .....            | 93                                 |
| <b>Preparation of variant mCh_DNA and mCh_RNA sequences</b> .....                         | 93                                 |
| <b>List of DNA and RNA sequences</b> .....                                                | 95                                 |
| <b>Sanger sequencing of UBP modified and unmodified DNA</b> .....                         | 106                                |
| <b>cNLS Mapper results for mCherry protein sequence</b> .....                             | 110                                |
| <b>References</b> .....                                                                   | Fehler! Textmarke nicht definiert. |

## General methods

### DNA template preparation

The DNA templates for ensuing *in vitro* transcriptions were prepared by PCR amplification from the *pmCherry-N1* plasmid employing either a six letter expanded genetic alphabet or standard PCR approach. Applying a forward primer holding the T7 promotor sequence as 5'-overhang (**mCh\_FW**) and either single or double **dNaM** modified or single or double T↔C mutated or unmodified reverse primer, nucleotides 618 to 1430 from the *pmCherry-N1* plasmid were amplified for **mCh\_DNA** resulting in either none (**mCh\_RV**), or one or two dA (plasmid) : dNaM (primer) or one or two dA (plasmid) : dC (primer) mismatches at positions 1418 (**mCh\_RV<sup>1 dNaM</sup>** or **mCh\_RV<sup>1 PM</sup>**) or 1411 and 1425 (**mCh\_RV<sup>2 dNaM</sup>** or **mCh\_RV<sup>2 PM</sup>**), respectively. For **mCh\_DNA<sub>UTR 2</sub>** the same forward primer was used, but together with the **mCh\_RV<sub>UTR 2</sub>** reverse primer including a 5' overhang sequence introducing an alternative sequence at the DNA coding strand's 3'-end. Applying the **mCh\_FW** and **mCh\_RV<sub>UTR 2</sub>** primer pair, nucleotides 618 to 1412 from the *pmCherry-N1* plasmid were amplified for **mCh\_DNA<sub>UTR 2</sub>**. Accordingly, either one or two dA (plasmid) : dNaM (primer) or one or two dA (plasmid) : dC (primer) mismatches were used to introduce modifications at position 1420 for **mCh\_DNA<sub>UTR 2</sub><sup>1 UBP</sup>** and **mCh\_DNA<sub>UTR 2</sub><sup>1 PM</sup>** or positions 1413 and 1427 for **mCh\_DNA<sub>UTR 2</sub><sup>2 UBP</sup>** and **mCh\_DNA<sub>UTR 2</sub><sup>2 PM</sup>**, respectively. PCR reactions were performed in 100 µL scale containing a final concentration of 20 mM Tris-HCl pH 8.9, 22 mM NH<sub>4</sub>Cl, 22 mM KCl, 1.8 mM MgCl<sub>2</sub>, 0.06 % IGEPAL® CA-630, 0.05 % Tween® 20 (*OneTaq*® Standard Reaction Buffer, *New England Biolabs*), 375 µM each canonical dNTP (*Jena Bioscience*), optionally 200 µM dNaM TP and dTPT3 TP, 1 µM forward and reverse primer (**mCh\_FW/mCh\_RV** for **mCh\_DNA** or **mCh\_FW/mCh\_RV<sup>1 dNaM</sup>** for **mCh\_DNA<sup>1 UBP</sup>** or **mCh\_FW/mCh\_RV<sup>2 dNaM</sup>** for **mCh\_DNA<sup>2 UBP</sup>** or **mCh\_FW/mCh\_RV<sup>1 PM</sup>** for **mCh\_DNA<sup>1 PM</sup>** or **mCh\_FW/mCh\_RV<sup>2 PM</sup>** for **mCh\_DNA<sup>2 PM</sup>** or **mCh\_FW/mCh\_RV<sub>UTR 2</sub>** for **mCh\_DNA<sub>UTR 2</sub>** or **mCh\_FW/mCh\_RV<sub>UTR 2</sub><sup>1 dNaM</sup>** for **mCh\_DNA<sub>UTR 2</sub><sup>1 UBP</sup>** or **mCh\_FW/mCh\_RV<sub>UTR 2</sub><sup>2 dNaM</sup>** for **mCh\_DNA<sub>UTR 2</sub><sup>2 UBP</sup>** or **mCh\_FW/mCh\_RV<sub>UTR 2</sub><sup>1 PM</sup>** for **mCh\_DNA<sub>UTR 2</sub><sup>1 PM</sup>** or **mCh\_FW/mCh\_RV<sub>UTR 2</sub><sup>2 PM</sup>** for **mCh\_DNA<sub>UTR 2</sub><sup>2 PM</sup>**), 0.5 ng µL<sup>-1</sup> *pmCherry-N1* as template and 0.025 U µL<sup>-1</sup> *OneTaq*® DNA Polymerase (*New England Biolabs*). PCR was performed with an initial denaturing step at 94 °C for 2 min, followed by 30 cycles of denaturing at 94 °C for 30 s, annealing at individual temperature for each sequence for 40 s, elongation at 68 °C for 1 min and a final elongation step at 68 °C for 3 min. Annealing temperatures for **mCh\_DNA** were set to 56 °C for **mCh\_DNA<sup>WT</sup>** or 51 °C for **mCh\_DNA<sup>1 UBP</sup>** or 55 °C for **mCh\_DNA<sup>1 PM</sup>**, 46 °C for **mCh\_DNA<sup>2 UBP</sup>** or 57 °C for **mCh\_DNA<sup>2 PM</sup>**. For **mCh\_DNA<sub>UTR 2</sub>** annealing temperatures were set to 61 °C for **mCh\_DNA<sub>UTR 2</sub><sup>WT</sup>** or 63 °C for **mCh\_DNA<sub>UTR 2</sub><sup>1 PM</sup>**, and **mCh\_DNA<sub>UTR 2</sub><sup>2 PM</sup>**. For **mCh\_DNA<sub>UTR 2</sub><sup>1 UBP</sup>** and **mCh\_DNA<sub>UTR 2</sub><sup>2 UBP</sup>** annealing temperatures for the first five cycles were set to 51 °C and 46 °C, respectively, then changed to 55 °C and 51 °C, respectively, for subsequent 25 cycles. PCR products were analyzed by agarose gel electrophoresis and purified using the *NucleoSpin*® Gel and PCR Clean-Up Kit (*Macherey-Nagel*) according to the manufacturer's protocol.

## mRNA *in vitro* transcription

For **mCh\_mRNA** and **mCh\_mRNA<sub>UTR 2</sub>** *in vitro* transcription, the *HiScribe™ T7 ARCA mRNA Kit (with tailing)* (New England Biolabs) was used. According to the manufacturer's protocol, co-transcriptionally ARCA-capped RNA was transcribed in a first step. Therefore 0.05 µg µL<sup>-1</sup> of purified template DNA per reaction was used. For *in vitro* transcriptions of **mCh\_mRNA<sup>1 CP</sup>** and **mCh\_mRNA<sup>2 CP</sup>** from the UBP modified DNA templates, **mCh\_DNA<sup>1 UBP</sup>** and **mCh\_DNA<sup>2 UBP</sup>**, or **mCh\_mRNA<sub>UTR 2</sub><sup>1 CP</sup>** and **mCh\_mRNA<sub>UTR 2</sub><sup>2 CP</sup>** from the UBP modified DNA templates, **mCh\_DNA<sub>UTR 2</sub><sup>1 UBP</sup>** and **mCh\_DNA<sub>UTR 2</sub><sup>2 UBP</sup>**, respectively, a concentration of 0.25 mM rTPT3<sup>CP</sup> TP was additionally added to the reaction. For additional Ψ and 5mC modifications, 1.25 mM Ψ TP and 1.25 mM 5mC TP were added to the IVT reaction mix. Following DNase template digestion by addition of 4 U DNase I to the reaction mix and incubation for 15 min, the transcribed RNA was polyadenylated with approximately 150 nt poly(A). Therefore a 50 µL tailing reaction was prepared including 10x Poly(A) Polymerase Buffer, Poly(A) Polymerase (unlisted concentrations of kit components) according to the manufacturer's protocol and incubated at 37 °C for 30 min. Subsequently the obtained mRNA was purified via LiCl precipitation according to the manufacturer's protocol.

## *In vitro* click reaction and fluorescence analysis

8 pmol each of **mCh\_mRNA<sup>WT</sup>**, **mCh\_mRNA<sup>1 CP</sup>**, **mCh\_mRNA<sup>2 CP</sup>**, **mCh\_mRNA<sup>1 PM</sup>**, **mCh\_mRNA<sup>2 PM</sup>** as well as **mCh\_mRNA<sub>UTR 2</sub><sup>WT</sup>**, **mCh\_mRNA<sub>UTR 2</sub><sup>1 CP</sup>**, **mCh\_mRNA<sub>UTR 2</sub><sup>2 CP</sup>**, **mCh\_mRNA<sub>UTR 2</sub><sup>1 PM</sup>**, **mCh\_mRNA<sub>UTR 2</sub><sup>2 PM</sup>** and H<sub>2</sub>O as control were incubated with 71 µM AF Dye 488 tetrazine (*Click Chemistry Tools*) in a total reaction volume of 7 µL at 25 °C in the dark for 1 h. Control samples of all **mCh\_mRNA** sequences were treated equally but without addition of AF Dye 488 tetrazine, instead a compensational volume of H<sub>2</sub>O was added. Then, agarose gel electrophoresis without addition of EtBr was performed and the resulting bands were analyzed first by fluorescence scanning, λ<sub>ex</sub> = 473 nm λ<sub>em</sub> = 520 nm, using a *Phosphorimager FLA-3000 (Fujifilm)*, before EtBr post-staining and visualization by UV illumination.

## Cell culture and mRNA transfection

Adherent HeLa cells were cultured in *Dulbecco's Modified Eagle Medium (1x DMEM) GlutaMAX™ (gibco™, Thermo Fisher Scientific)* supplemented with 10 % foetal calf serum (FCS) (*Sigma, Batch No.: 054M3399*), 1 % *Minimum Essential Medium (MEM) non-essential amino acids solution (100x, gibco™, Thermo Fisher Scientific)* and 1 % sodium pyruvate (100 mM, *gibco™, Thermo Fisher Scientific*) in *TC Flask T75, Standard (Sarstedt)* cell culture flasks at 37 °C and 5 % CO<sub>2</sub>. Cell confluence was kept between 80-90 %, therefore cells were split at regular intervals of two to three days. Therefore, cells were washed with 8 mL *Dulbecco's Phosphate Buffered Saline (1x DPBS) (gibco™, Thermo Fisher Scientific)*, trypsinized with 2 mL Trypsin-EDTA (0.05%) (*gibco™, Thermo Fisher Scientific*) and incubated at 37 °C and 5 % CO<sub>2</sub> for 5 to 10 min, before partly transferred into a new cell culture flask with fresh *DMEM* medium.

For **mCh\_mRNA** transfection experiments cells were seeded in a *TC Plate 24 well, Standard (Sarstedt)* to a density of 70 000 cells per well in 500  $\mu\text{L}$  *DMEM* medium the day before transfection. For fixed cell imaging with confocal fluorescence microscopy, additionally glass coverslips ( $\varnothing$ : 15 mm, thickness 1, *Mariefeld*) were placed in each well prior to cell seeding. HeLa cells were transfected using *Lipofectamine<sup>®</sup> MessengerMAX<sup>™</sup> (Invitrogen)* transfection reagent. According to the manufacturer's protocol, for each well of cells to be transfected 1.5  $\mu\text{L}$  *MessengerMAX<sup>™</sup>* was diluted in 25  $\mu\text{L}$  *Opti-MEM<sup>®</sup> Reduced-Serum Medium (gibco<sup>™</sup>, Thermo Fisher Scientific)*, vortexed thoroughly and incubated at room temperature (RT) for 10 min. Likewise 0.5  $\mu\text{g}$   $\mu\text{L}^{-1}$  **mCh\_mRNA** (consistend for all different **mCh\_mRNA** sequences) or 1  $\mu\text{L}$   $\text{H}_2\text{O}$  as control was diluted in 25  $\mu\text{L}$  *Opti-MEM<sup>®</sup>*. Diluted mRNA and diluted *MessengerMAX<sup>™</sup>* were mixed in an 1:1 ratio, vortexed thoroughly and incubated at RT for 5 min. The mRNA-lipid complex was then added dropwisely to the cell medium and cells were incubated for 6, 24 or 48 h at 37 °C and 5 %  $\text{CO}_2$ . 4 h after transfection start the cell medium was exchanged for fresh *DMEM* medium.

### Live cell click reaction and confocal fluorescence microscopy

After implementation of **mCh\_mRNA** transfection and incubation for 6, 24 or 48 h for **mCh\_mRNA** translation and mCherry reporter protein expression, 1  $\mu\text{L}$  AFDye 488 tetrazine (500  $\mu\text{M}$ ) (*Click Chemistry Tools*) was added to the cell medium of each well. Cells were incubated at 37 °C and 5 %  $\text{CO}_2$  for 1 h for implementation of the iEDDA click reaction. Then, cells were washed once with 500  $\mu\text{L}$  *1x DPBS* per well before addition of 500  $\mu\text{L}$  of 3.7 % formaldehyde solution (*Formaldehyde, 37 wt% solution in water, stabilized with 5-15 % methanol, Acros Organics*, diluted 1:10 in *1x DPBS*) per well and incubation at RT for 10 min for cell fixation. Subsequently cells were washed trice with 500  $\mu\text{L}$  *1x DPBS* per well and washing step. Cell nuclei counterstaining was performed adding 1 mL of *4',6-Diamidino-2-phenylindole (DAPI) (Merck, 1  $\mu\text{g}$   $\mu\text{L}^{-1}$  solution in  $\text{H}_2\text{O}$ )* per well and incubation at RT for 2 min. Afterwards cells were again washed trice with 500  $\mu\text{L}$  *1x DPBS* per well and washing step. Cell cover slips were mounted on microscope slides (90° ground edges, frosted, *Carl Roth*) using *Fluoro-Gel (with Tris buffer)* mounting medium (*Electron Microscopy Sciences*), let dry at RT overnight and sealed with nail polish.

Confocal fluorescence fixed cell imaging of **mCh\_mRNA** transfected and live cell clicked HeLa cells was performed on a *LSM 710 (Zeiss)* Laser Scanning Microscope equipped with a 40x/1.4 DIC oil objective. Red fluorescence emission of translated and expressed mCherry reporter protein was imaged with Ex/Em = 543/637 nm. Green fluorescence emission of AFDye 488 clicked **mCh\_mRNA<sup>1CP</sup>** and **mCh\_mRNA<sup>2CP</sup>** or **mCh\_mRNA<sup>1CP</sup><sub>UTR 2</sub>** and **mCh\_mRNA<sup>2CP</sup><sub>UTR 2</sub>**, respectively, was imaged with Ex/Em = 488/516 nm. DAPI counterstained cell nuclei were imaged with Ex/Em = 405/460 nm. For each image and channel a number of four scans was averaged. Z-stack images for signal localization analysis were taken with intervals of 3.426  $\mu\text{m}$  (corresponds 1 AU).

### mCherry protein quantification

mCherry protein quantification was performed using a *mCherry Quantification Kit (BioVision)* in combination with *RIPA Lysis and Extraction Buffer (Thermo Fisher Scientific)*. After implementation of **mCh\_mRNA** transfection and incubation for 6, 24 or 48 h for **mCh\_mRNA** translation and mCherry reporter protein expression, the cell medium

was removed and 130  $\mu\text{L}$  assay buffer (*RIPA Lysis and Extraction Buffer* supplemented with 1 mM *Phenylmethylsulfonyl fluoride* (PMSF), *Thermo Fisher Scientific*) added. After incubation on ice for 20 min, the samples were centrifuged at  $10 \times g$ ,  $4^\circ\text{C}$  for 5 min. The supernatants were directly taken for accomplishment of the quantification assay or stored at  $-20^\circ\text{C}$  until all time course samples were collected. Using a 10 ng/ $\mu\text{L}$  mCherry working solution a mCherry standard series of 0, 20, 40, 60, 80, 100 ng/well was prepared as duplicate in a 96-well plate and all volumes adjusted to 100  $\mu\text{L}$  with assay buffer. Frozen samples were gently thawed on ice. Each 100  $\mu\text{L}$  of supernatant was transferred into the plate. mCherry fluorescence was measured at Ex/Em = 587/610 nm at  $25^\circ\text{C}$  using an *EnSpire Multimode Plate Reader* (*Perkin Elmer*). All measured fluorescence values were offset corrected and the mCherry standard curve was plotted. The fluorescence readings of samples were applied to the mCherry standard curve to calculate the amount of mCherry protein in the sample wells. Mean values of mCherry protein amounts were calculated for technical duplicates of each transfection condition ( $\text{mCh\_mRNA}^{\text{WT}}$  or  $\text{mCh\_mRNA}^{\text{1 CP}}$  or  $\text{mCh\_mRNA}^{\text{2 CP}}$  or  $\text{mCh\_mRNA}^{\text{1 PM}}$  or  $\text{mCh\_mRNA}^{\text{2 PM}}$  or  $\text{mCh\_mRNA}^{\text{WT, } \Psi+5\text{mC}}$  or  $\text{mCh\_mRNA}^{\text{1 CP, } \Psi+5\text{mC}}$  or  $\text{mCh\_mRNA}^{\text{2 CP, } \Psi+5\text{mC}}$  or  $\text{mCh\_mRNA}_{\text{UTR 2}}^{\text{WT}}$  or  $\text{mCh\_mRNA}_{\text{UTR 2}}^{\text{1 CP}}$  or  $\text{mCh\_mRNA}_{\text{UTR 2}}^{\text{2 CP}}$  or  $\text{mCh\_mRNA}_{\text{UTR 2}}^{\text{1 PM}}$  or  $\text{mCh\_mRNA}_{\text{UTR 2}}^{\text{2 PM}}$ ). Also, mCherry protein amounts for corresponding transfection conditions from biologically independent experiments were averaged ( $n=20$  for  $\text{mCh\_mRNA}^{\text{WT}}$ ,  $\text{mCh\_mRNA}^{\text{1 CP}}$  and  $\text{mCh\_mRNA}^{\text{2 CP}}$ ,  $n=10$  for  $\text{mCh\_mRNA}^{\text{1 PM}}$  or  $\text{mCh\_mRNA}^{\text{2 PM}}$  or  $\text{mCh\_mRNA}^{\text{WT, } \Psi+5\text{mC}}$ ,  $\text{mCh\_mRNA}^{\text{1 CP, } \Psi+5\text{mC}}$  or  $\text{mCh\_mRNA}^{\text{2 CP, } \Psi+5\text{mC}}$  or  $\text{mCh\_mRNA}_{\text{UTR 2}}^{\text{WT}}$  or  $\text{mCh\_mRNA}_{\text{UTR 2}}^{\text{1 CP}}$  or  $\text{mCh\_mRNA}_{\text{UTR 2}}^{\text{2 CP}}$  or  $\text{mCh\_mRNA}_{\text{UTR 2}}^{\text{1 PM}}$  or  $\text{mCh\_mRNA}_{\text{UTR 2}}^{\text{2 PM}}$ ).

### RT-qPCR analysis of mRNA levels

After implementation of **mCh\_mRNA** transfection and incubation for 6, 24 or 48 h, the cells were lysed and total cellular RNA was isolated. Total RNA isolation was accomplished using the NucleoSpin<sup>®</sup> RNA Kit (Macherey-Nagel) according to the manufacturer's protocol.

RT-qPCR reactions were performed applying the GoTaq<sup>®</sup> Probe 2 step RT-qPCR System (Promega). Initial experiments were performed to ensure compatibility of multiplexing qPCR and to determine amplification efficiencies (see Supplementary Information). Reverse transcription was accomplished separately for each transfection condition and controls. First, denaturing of RNA templates and primers was performed in a 7  $\mu\text{L}$  scale with 100 ng of isolated cellular total RNA, 0.5  $\mu\text{g}$  Oligo(dT)<sub>15</sub> primer and 0.5  $\mu\text{g}$  random primers. RNA/primer mixes were pipetted on ice, then incubated at  $70^\circ\text{C}$  for 5 min and subsequently chilled in an ice-water bath for at least 5 min. According to the manufacturers' protocol, master mixes for reverse transcription (RT) and no-reverse transcriptase (NRT) controls were prepared on ice with a total volume of 13  $\mu\text{L}$  per each reaction. 13  $\mu\text{L}$  each of RT or NRT master mix were added to 7  $\mu\text{L}$  each of RNA/primer mixes for a final reaction volume of 20  $\mu\text{L}$  containing GoScript<sup>™</sup> Reaction Buffer (unlisted concentrations of GoTaq<sup>®</sup> Probe 2 step RT-qPCR System component), 2 mM  $\text{MgCl}_2$ , 500  $\mu\text{M}$  PCR nucleotide mix, 50 U recombinant RNasin ribonuclease inhibitor and GoScript<sup>™</sup> reverse transcriptase (unlisted concentration of GoTaq<sup>®</sup> Probe 2 step RT-qPCR System component) for RT or compensational amount of ddH<sub>2</sub>O for NRT controls, respectively. RT and NRT reaction mixes were incubated at  $25^\circ\text{C}$  for 5 min to hybridize RNA and primers, followed by  $42^\circ\text{C}$  for 45 min for implementation of reverse

transcription and subsequent enzyme inactivation at 70 °C for 15 min. For usage in qPCR, the reverse transcribed cDNA samples and NRT control reactions were diluted 1:2 with ddH<sub>2</sub>O. 0.625 µL of diluted cDNA or NRT control were then taken per each qPCR reaction. According to the manufacturer's protocol, qPCR master mixes were prepared on ice and added to diluted cDNA or NRT control, respectively. Each qPCR reaction was complemented in a total volume of 20 µL containing GoTaq<sup>®</sup> Probe qPCR master mix (unlisted concentration of GoTaq<sup>®</sup> Probe 2 step RT-qPCR System component), 200 nM **mCh\_qPCR<sup>internal</sup>\_FW** forward primer, 200 nM **mCh\_qPCR<sup>internal</sup>\_RV** reverse primer, 300 nM **mCh\_qPCR<sup>internal</sup>\_probe**, 200 nM **mCh\_qPCR<sup>3'-end</sup>\_FW** forward primer, 200 nM **mCh\_qPCR<sup>3'-end</sup>\_RV** reverse primer, 300 nM **mCh\_qPCR<sup>3'-end</sup>\_probe**, 200 nM **GAPDH\_qPCR\_FW** forward primer, 200 nM **GAPDH\_qPCR\_RV** reverse primer, 300 nM **GAPDH\_qPCR\_probe**, 200 nM **β-Actin\_qPCR\_FW** forward primer, 200 nM **β-Actin\_qPCR\_RV** reverse primer and 300 nM **β-Actin\_qPCR\_probe**. qPCR master mix and cDNA or NRT dilutions, respectively, as well as a no-template control (NRT) for qPCR were pipetted into 96-well PCR plates (Hard-Shell<sup>®</sup> 96-Well PCR Plates, low profile, thin wall, skirted, white/white, Bio-Rad) on ice. The qPCR plate was sealed with adhesive foil (Microseal 'B' PCR Plate Sealing Film, adhesive, optical, Bio-Rad), briefly centrifuged and placed into the qPCR thermal cycler (CFX96 Touch Real-Time PCR Detection System, Bio-Rad). qPCR cycling was performed with an initial denaturing step at 95 °C for 2 min, followed by 40 cycles of denaturing at 95 °C for 15 s and a combined step for annealing and elongation at 60 °C for 1 min. All qPCR reactions were performed as technical triplets. C<sub>t</sub> values for each target gene were calculated by the CFX Maestro software (Bio-Rad). C<sub>t</sub> mean values and standard deviation (s.d.) of technical triplicate samples were calculated first, then ΔC<sub>t</sub> values of either **mCh\_qPCR<sup>internal</sup>** C<sub>t</sub> mean values or **mCh\_qPCR<sup>3'-end</sup>** C<sub>t</sub> mean values were calculated by subtraction with the corresponding **GAPDH\_qPCR** reference gene C<sub>t</sub> mean values. Next, calculated ΔC<sub>t</sub> values of either **mCh\_qPCR<sup>internal</sup>** or **mCh\_qPCR<sup>3'-end</sup>** of two biologically independent experiments were averaged. ΔΔC<sub>t</sub> values of either **mCh\_qPCR<sup>internal</sup>** or **mCh\_qPCR<sup>3'-end</sup>** were calculated by subtracting the averaged ΔC<sub>t</sub> value of the corresponding sample transfected with **mCh\_mRNA<sup>WT</sup>** and lysed 6 h post transfection from the respective averaged ΔC<sub>t</sub> value of a sample transfected with modified **mCh\_mRNA** (**mCh\_mRNA<sup>1CP</sup>** or **mCh\_mRNA<sup>2CP</sup>** or **mCh\_mRNA<sup>1PM</sup>** or **mCh\_mRNA<sup>2PM</sup>** or **mCh\_mRNA<sup>WT, Ψ+5mC</sup>** or **mCh\_mRNA<sup>1CP, Ψ+5mC</sup>** or **mCh\_mRNA<sup>2CP, Ψ+5mC</sup>** or **mCh\_mRNA<sup>WT</sup><sub>UTR 2</sub>** or **mCh\_mRNA<sup>1CP</sup><sub>UTR 2</sub>** or **mCh\_mRNA<sup>2CP</sup><sub>UTR 2</sub>** or **mCh\_mRNA<sup>1PM</sup><sub>UTR 2</sub>** or **mCh\_mRNA<sup>2PM</sup><sub>UTR 2</sub>**) and lysed at 6, 24 or 48 h post transfection. Fold changes of 2<sup>-ΔΔC<sub>t</sub></sup> were then calculated from the corresponding ΔΔC<sub>t</sub> values.

## Cell viability assays

For cell viability assays the RealTime-Glo<sup>™</sup> MT Cell Viability Assay (Promega) was used. Other than for protein quantification and RT-qPCR analysis, cells were seeded in a 96 well microplate, PS, µClear<sup>®</sup> bottom, chimney well (Greiner Bio-One) to a density of 2 500 cells per well in 100 µL DMEM medium the day before transfection. HeLa cells were transfected using Lipofectamine<sup>®</sup> MessengerMAX<sup>™</sup> (Invitrogen) transfection reagent. According to the manufacturer's protocol, for each well of cells to be transfected 0.3 µL MessengerMAX<sup>™</sup> was diluted in 4.7 µL Opti-MEM<sup>®</sup> Reduced-Serum Medium (gibco<sup>™</sup>, Thermo Fisher Scientific), vortexed thoroughly and incubated at room temperature (RT) for 10 min. Likewise 100 ng µL<sup>-1</sup> **mCh\_mRNA** (consistend for all different **mCh\_mRNA**

sequences) or an equivalent volume of H<sub>2</sub>O as control was diluted in 5 µL *Opti-MEM*<sup>®</sup>. Diluted mRNA and diluted *MessengerMAX*<sup>™</sup> were mixed in an 1:1 ratio, vortexed thoroughly and incubated at RT for 5 min. The mRNA-lipid complex was then added dropwisely to the cell medium and cells were incubated for 24 h at 37 °C and 5 % CO<sub>2</sub>. 4 h after transfection start the cell medium was exchanged for 100 µL fresh *DMEM* medium including 1x MT Cell Viability Substrate and 1x NanoLuc<sup>®</sup> Enzyme (RealTime-Glo<sup>™</sup> MT Cell Viability Assay Kit, Promega). Luminescence was measured 6, 8, 22, 24 h post transfection with an integration time of 0.1 s, at 37 °C using an *EnSpire Multimode Plate Reader* (*Perkin Elmer*). Then, 0.2 µL AFDye 488 tetrazine (500 µM) (*Click Chemistry Tools*) was added to the cell medium of each well. Likewise, 2 µL Triton X-100 (10% in H<sub>2</sub>O) were added to control wells without mRNA treatment for induced cell lysis. Luminescence was measured 1 and 2 h post addition of AFDye 488 tetrazine, corresponding to 25 and 26 post transfection. Mean values ± S.D. of measured luminescence were calculated for technical triplicates of each transfection condition (**mCh\_mRNA<sup>WT</sup>** or **mCh\_mRNA<sup>1CP</sup>** or **mCh\_mRNA<sup>2CP</sup>** or **mCh\_mRNA<sup>1PM</sup>** or **mCh\_mRNA<sup>2PM</sup>** or **mCh\_mRNA<sup>WT, Ψ+5mC</sup>** or **mCh\_mRNA<sup>1CP, Ψ+5mC</sup>** or **mCh\_mRNA<sup>2CP, Ψ+5mC</sup>** or H<sub>2</sub>O Ctrl.), likewise for the untreated cells Ctrl. and lysed cells Ctrl..



## Agarose gel electrophoresis

### Analytical agarose gel electrophoresis

For analytical agarose gel electrophoresis, either a 2 % (w/v) (for mCh\_DNA and mCh\_RNA sequences) or 4 % (w/v) (for qPCR sequences) solution of agarose high resolution (*Sigma*) in 0.5 % Tris-borate-EDTA buffer (0.5 x TBE, Tris, *Carl Roth*, Boric acid, *Labochem International*, EDTA, *AppliChem*) supplemented with 1 mg mL<sup>-1</sup> ethidium bromide (EtBr, *Carl Roth*) was used. Samples were prepared using a homemade 2 x loading buffer (50 mM Tris-HCl pH 8.3, 15 % (w/v) Ficoll® 400, 6 mM EDTA, 0.25 % (w/v) bromophenol blue). 0.5 x TBE was employed as running buffer. Gel electrophoresis was performed at 150 V const. for 20 to 30 min. Gene Ruler 100 bp DNA Ladder (*Thermo Fisher Scientific*) was used as dsDNA standard for mCh\_DNA and mCh\_mRNA sequences. Gene Ruler Ultra Low Range DNA Ladder (*Thermo Fisher Scientific*) was used as dsDNA standard for mCh\_qPCR sequences. Analytical agarose gels were visualized by UV illumination using a Gel Doc 2000 gel documentation system (*Bio-Rad*).

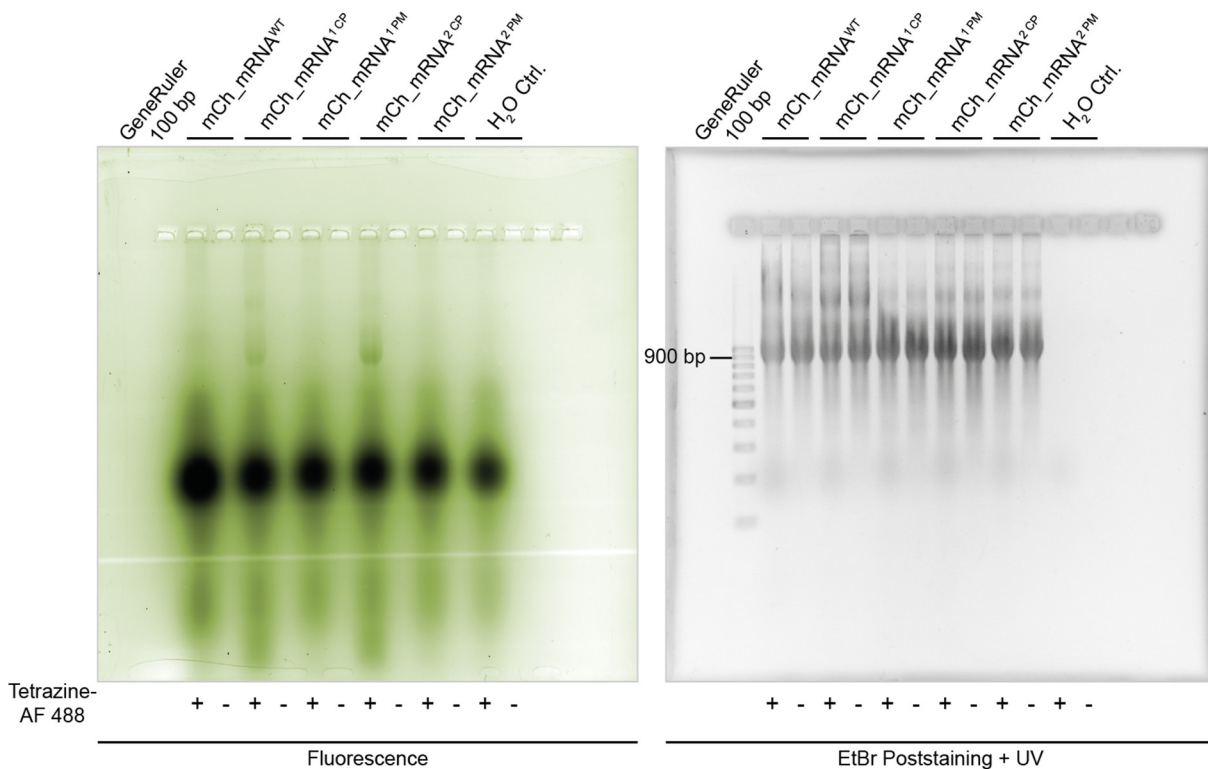

**Supplementary Figure 1.** mCh\_mRNA *in vitro* click reaction with AF Dye 488. Fluorescence scan on the left, EtBr post-staining and UV-scan on the right. Segments shown in Figure 2.

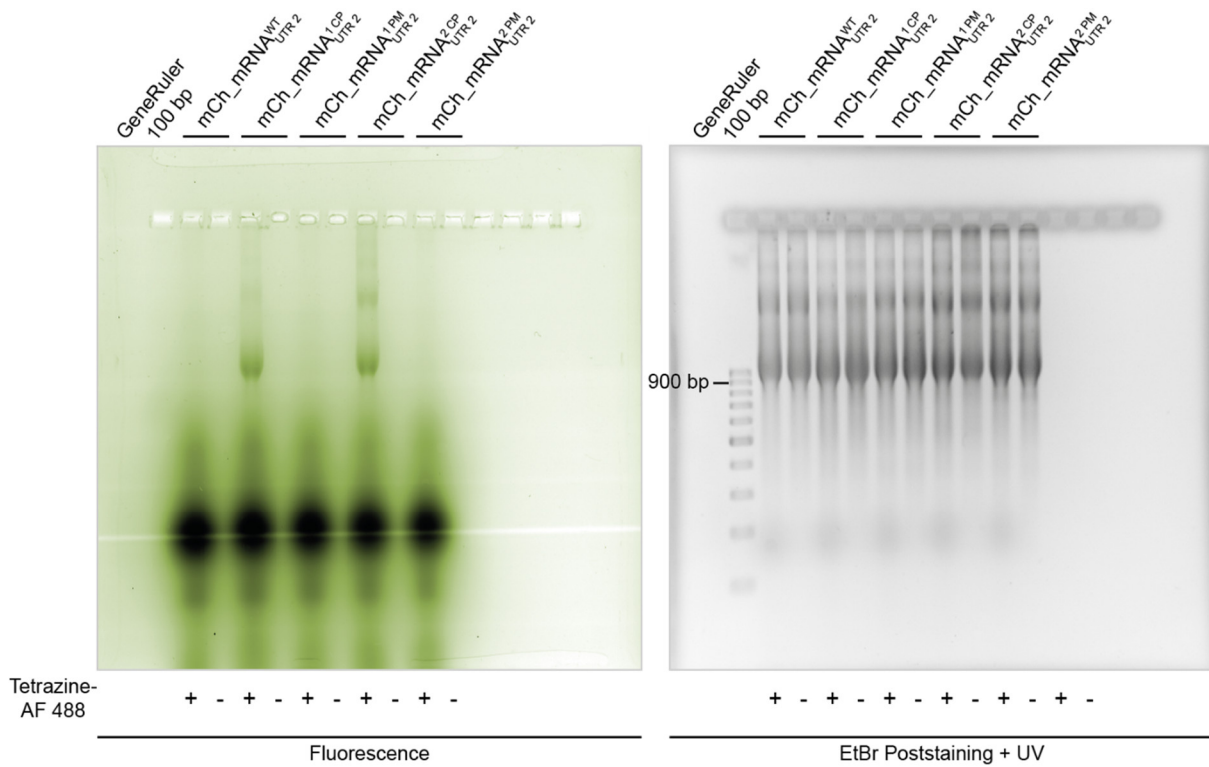

**Supplementary Figure 2.** mCh\_mRNA<sub>UTR2</sub> *in vitro* click reaction with AF Dye 488. Fluorescence scan on the left, EtBr post-staining and UV-scan on the right.

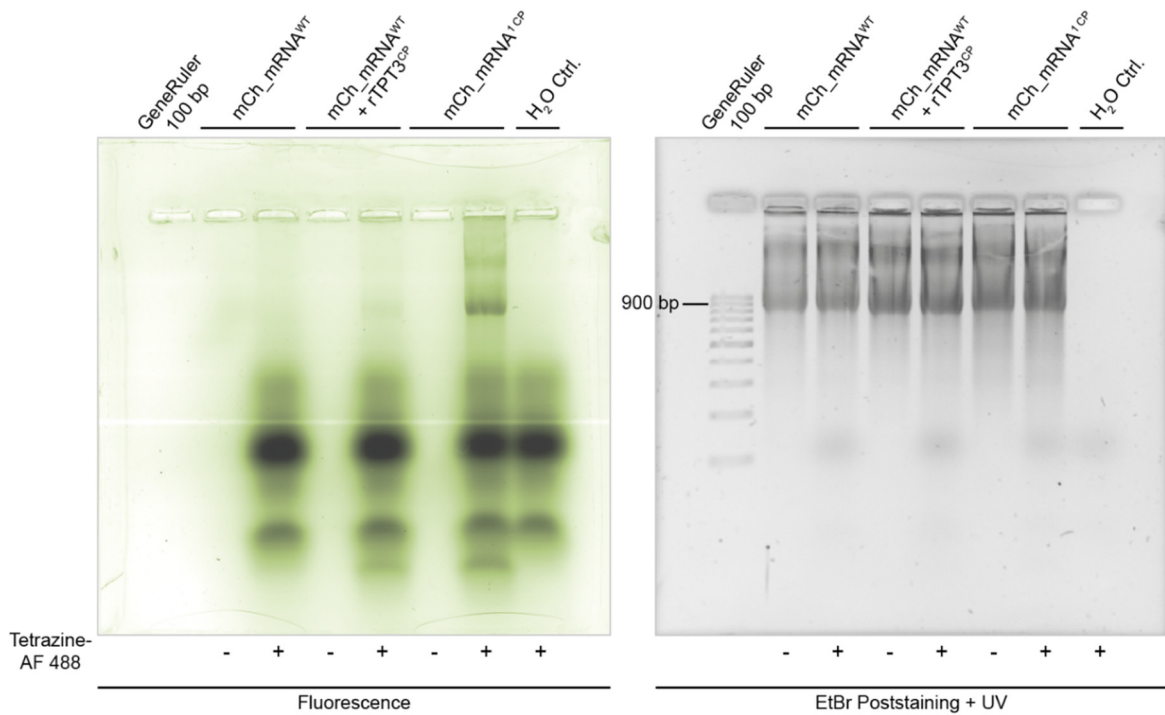

**Supplementary Figure 3.** mCh\_mRNA and mCh\_mRNA<sup>2CP</sup> *in vitro* click reaction with AF Dye 488. Fluorescence scan on the left, EtBr post-staining and UV-scan on the right. To check for unspecific rTPT3<sup>CP</sup> incorporation into UB-unmodified mCh\_mRNA, two samples of mCh\_mRNA were prepared by *in vitro* transcription from the unmodified mCh\_DNA, one with and the other without extra addition of the UB rTPT3<sup>CP</sup>.

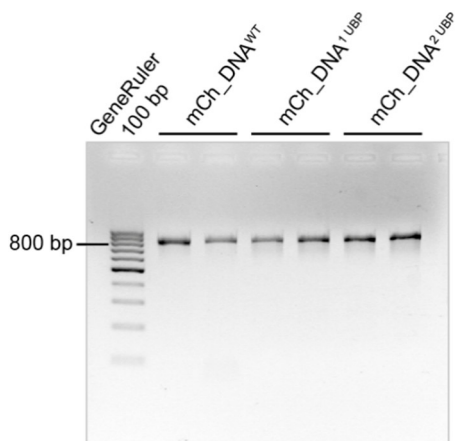

**Supplementary Figure 4.** PCR preparation of unmodified and UBP-modified **mCh\_DNA** templates. Segments shown in Figure 2.

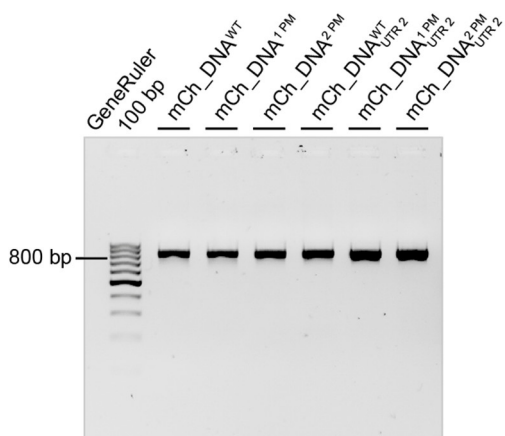

**Supplementary Figure 5.** PCR preparation of **mCh\_DNA** and **mCh\_DNA**<sub>UTR2</sub> templates.

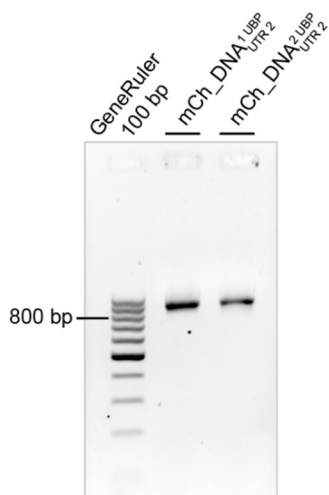

**Supplementary Figure 6.** PCR preparation of UBP-modified **mCh\_DNA**<sub>UTR2</sub> templates.

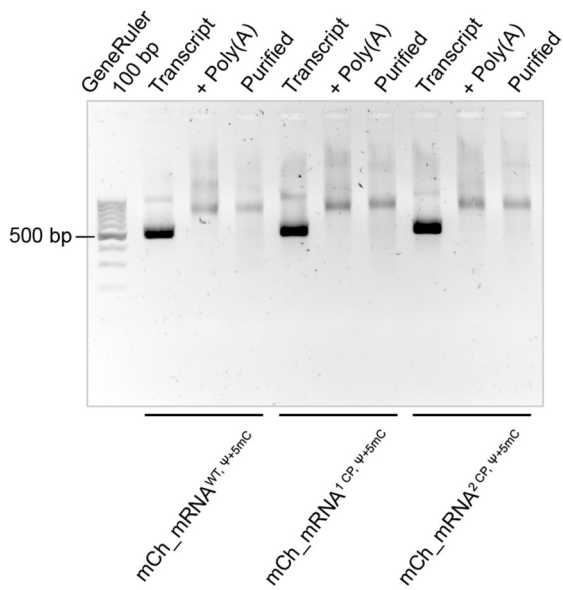

**Supplementary Figure 7.** *In vitro* transcribed mCh\_mRNA<sup>ψ+5mC</sup> with optional rTPT3<sup>CP</sup> modification. Samples were taken after DNase digestion post transcription (Transcript), after Poly(A) tailing reaction reaction (+ Poly(A)) and after LiCl precipitation and mRNA purification (Purified). Segments shown in Figure 2.

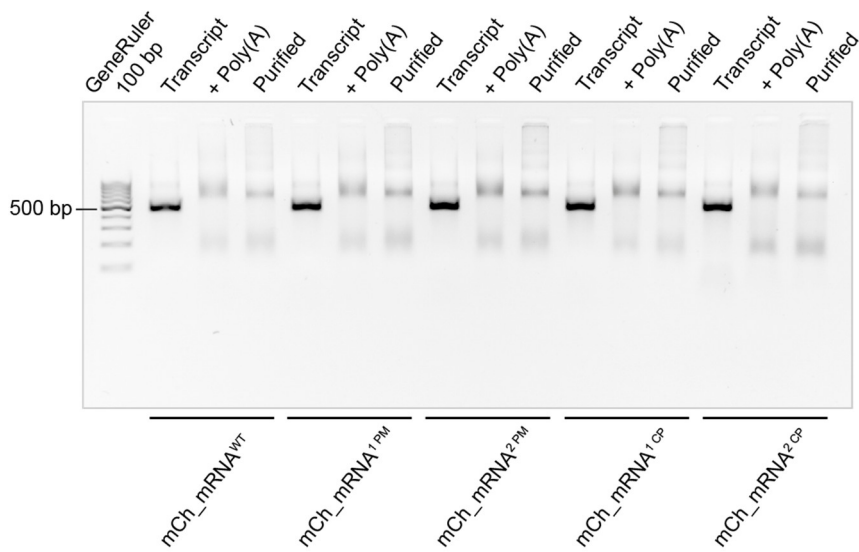

**Supplementary Figure 8.** *In vitro* transcribed mCh\_mRNA with optional rTPT3<sup>CP</sup> modification. Samples were taken after DNase digestion post transcription (Transcript), after Poly(A) tailing reaction reaction (+ Poly(A)) and after LiCl precipitation and mRNA purification (Purified). Segments shown in Figure 2.

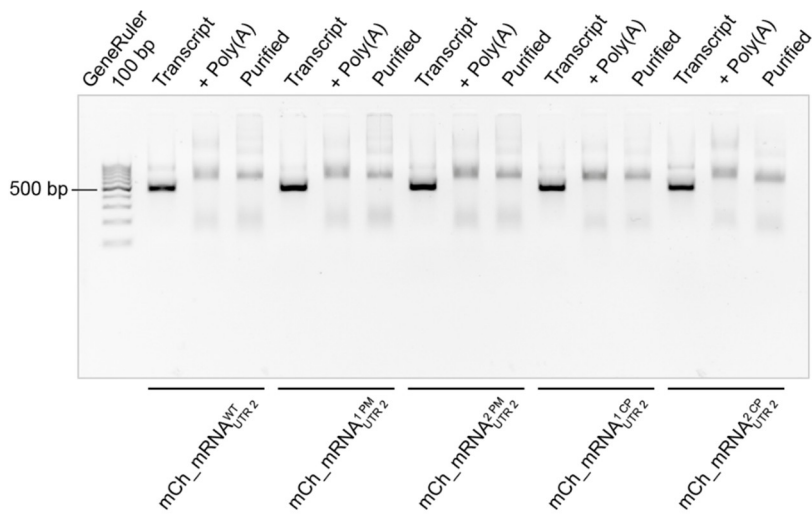

**Supplementary Figure 9.** *In vitro* transcribed mCh\_mRNA<sub>UTR2</sub> with optional rTPT3<sup>CP</sup> modification. Samples were taken after DNase digestion post transcription (Transcript), after Poly(A) tailing reaction (+ Poly(A)) and after LiCl precipitation and mRNA purification (Purified).

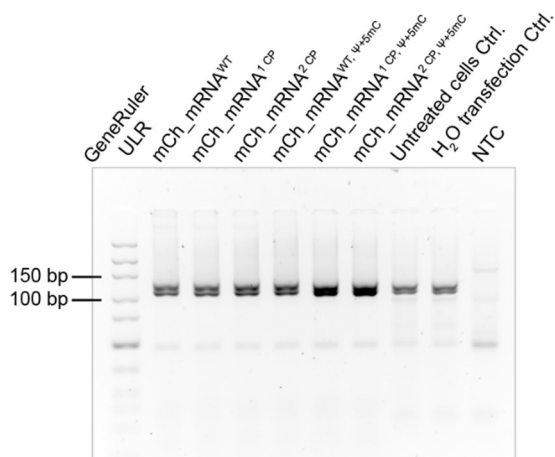

**Supplementary Figure 10.** RT-qPCR products from cells transfected with mCh\_mRNA and mCh\_mRNA<sup>Ψ+5mC</sup>. Cell lysis and total cellular RNA isolation was performed 6 h post transfection.

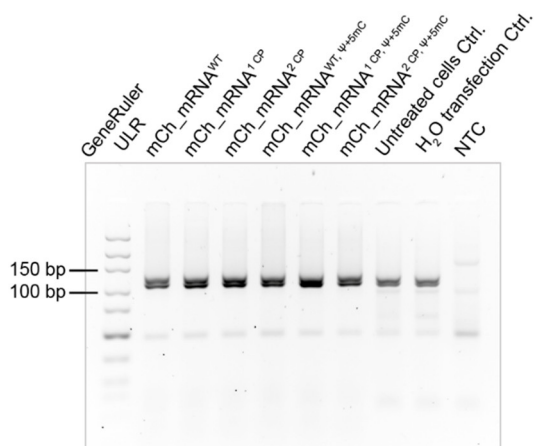

**Supplementary Figure 11.** RT-qPCR products from cells transfected with mCh\_mRNA and mCh\_mRNA<sup>Ψ+5mC</sup>. Cell lysis and total cellular RNA isolation was performed 24 h post transfection.

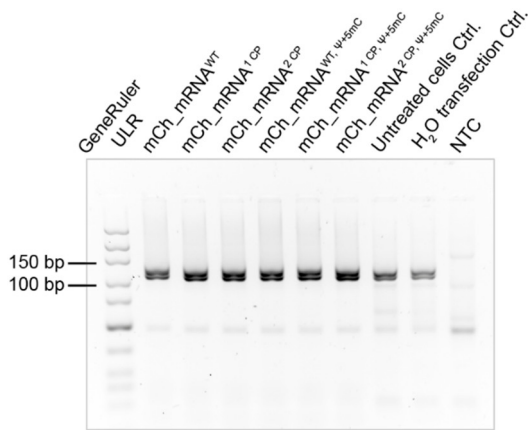

**Supplementary Figure 12.** RT-qPCR products from cells transfected with mCh\_mRNA and mCh\_mRNA<sup>ψ5mC</sup>. Cell lysis and total cellular RNA isolation was performed 48 h post transfection.

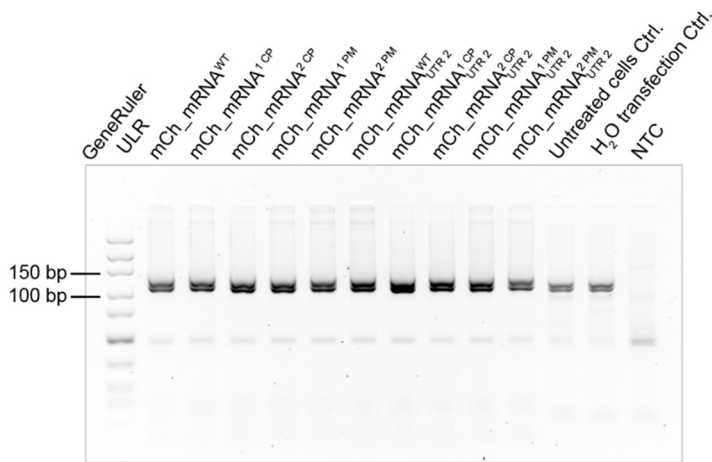

**Supplementary Figure 13.** RT-qPCR products from cells transfected with mCh\_mRNA and mCh\_mRNA<sub>UTR2</sub>. Cell lysis and total cellular RNA isolation was performed 6 h post transfection.

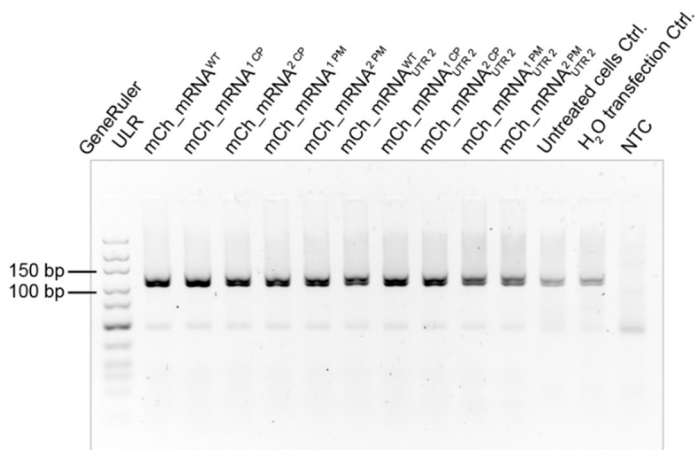

**Supplementary Figure 14.** RT-qPCR products from cells transfected with mCh\_mRNA and mCh\_mRNA<sub>UTR2</sub>. Cell lysis and total cellular RNA isolation was performed 24 h post transfection.

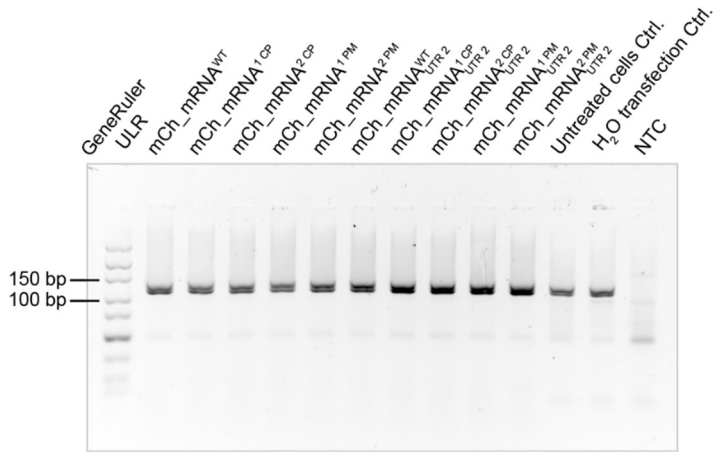

**Supplementary Figure 15.** RT-qPCR products from cells transfected with mCh\_mRNA and mCh\_mRNA<sub>UTR 2</sub>. Cell lysis and total cellular RNA isolation was performed 48 h post transfection.

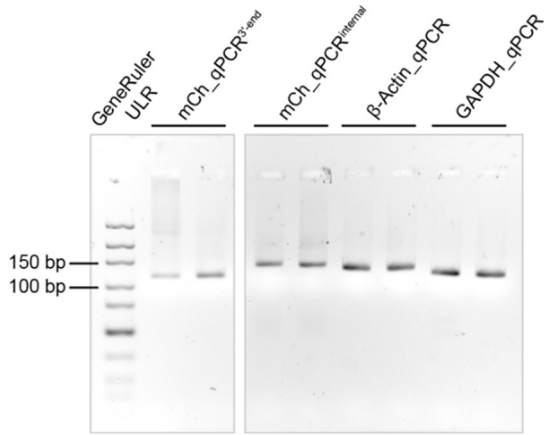

**Supplementary Figure 16.** PCR amplification of qPCR products.

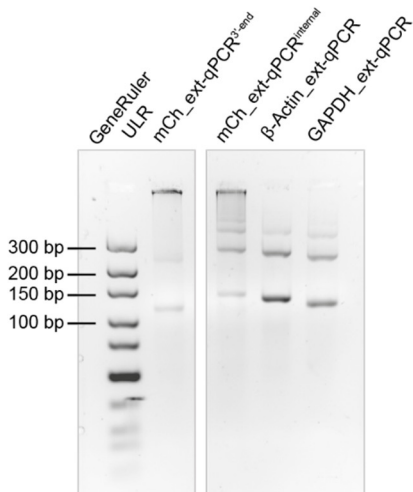

**Supplementary Figure 17.** Extended qPCR ligation products.

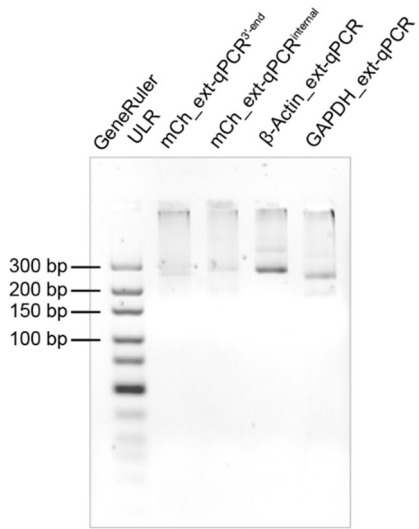

**Supplementary Figure 18.** PCR amplification of extended qPCR products.



## **Nucleic acid concentration determination**

Concentrations of DNA and RNA samples were determined by absorption at 260 nm ( $A_{260}$ ) using a *Nanodrop UV-spectrometer 2000c* (Thermo Fisher Scientific). Concentrations were obtained from the  $A_{260}$  value and software-assisted calculation (native sequences containing canonical bases were plotted for modified RNA or DNA oligonucleotides, <http://biotools.nubic.northwestern.edu/OligoCalc.html>)

## **Microscopy data analysis**

Raw microscopy images were exported to tagged image file format (TIF) with Zeiss Zen 3.3 (blue edition) and processed with Adobe Photoshop CS5. Different fluorescent and transmitted light signals were divided into single layers for each signal. Tonal correction was performed for each layer. Red (mCherry protein) and green (clicked CP labeled mRNA) signal layers were treated identically during tonal correction for all different mRNA transfection samples and treatment controls and for all different time points. Also, red and green signal layers were treated identically during subsequent brightness adjustment for all different mRNA transfection samples and treatment controls and for all different time points. Blue (DAPI cell nuclei counterstain) and transmitted light signal layers were treated individually during tonal correction for each image. To enhance visibility of the blue signal, the blue signal layer was copied, converted to greyscale and placed behind the blue signal layer. The blue greyscale layer's opacity was reduced to 10 percent and the blend mode was changed to "luminosity". For the transmitted light signal, brightness and contrast adjustments were performed, discriminative for each image. To create a merged image, the blend modes of all fluorescent signal layers were changed to "screen". Scale bars graphics were calculated and added to the raw microscopy images by the Zen 3.3 software, then measured in pixel size with Photoshop CS5 and added as fixed size boxes in a new layer of the processed image.

Overview images: Scale bars corresponds to 20  $\mu\text{m}$ .

Z-stack: Scale bar corresponds to 10  $\mu\text{m}$ .

Close-up images: Scale bars corresponds to 10  $\mu\text{m}$ .

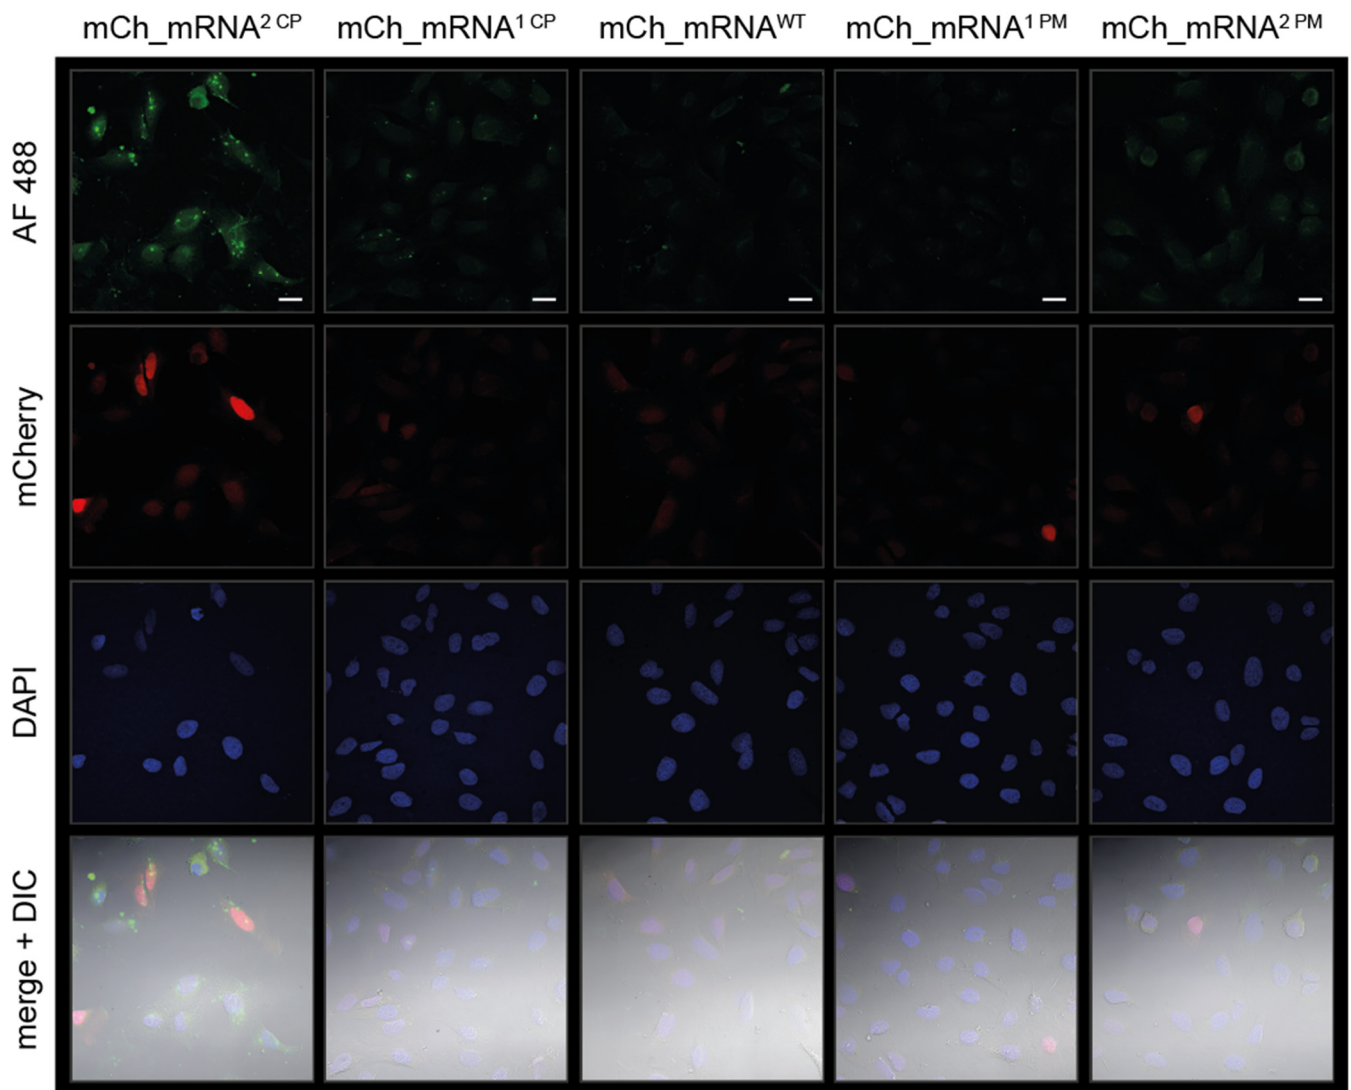

**Supplementary Figure 19.** Confocal fluorescence images of cells transfected with **mCh\_mRNA**, 6h post transfection. Excerpts are shown in Figure 3, main text.

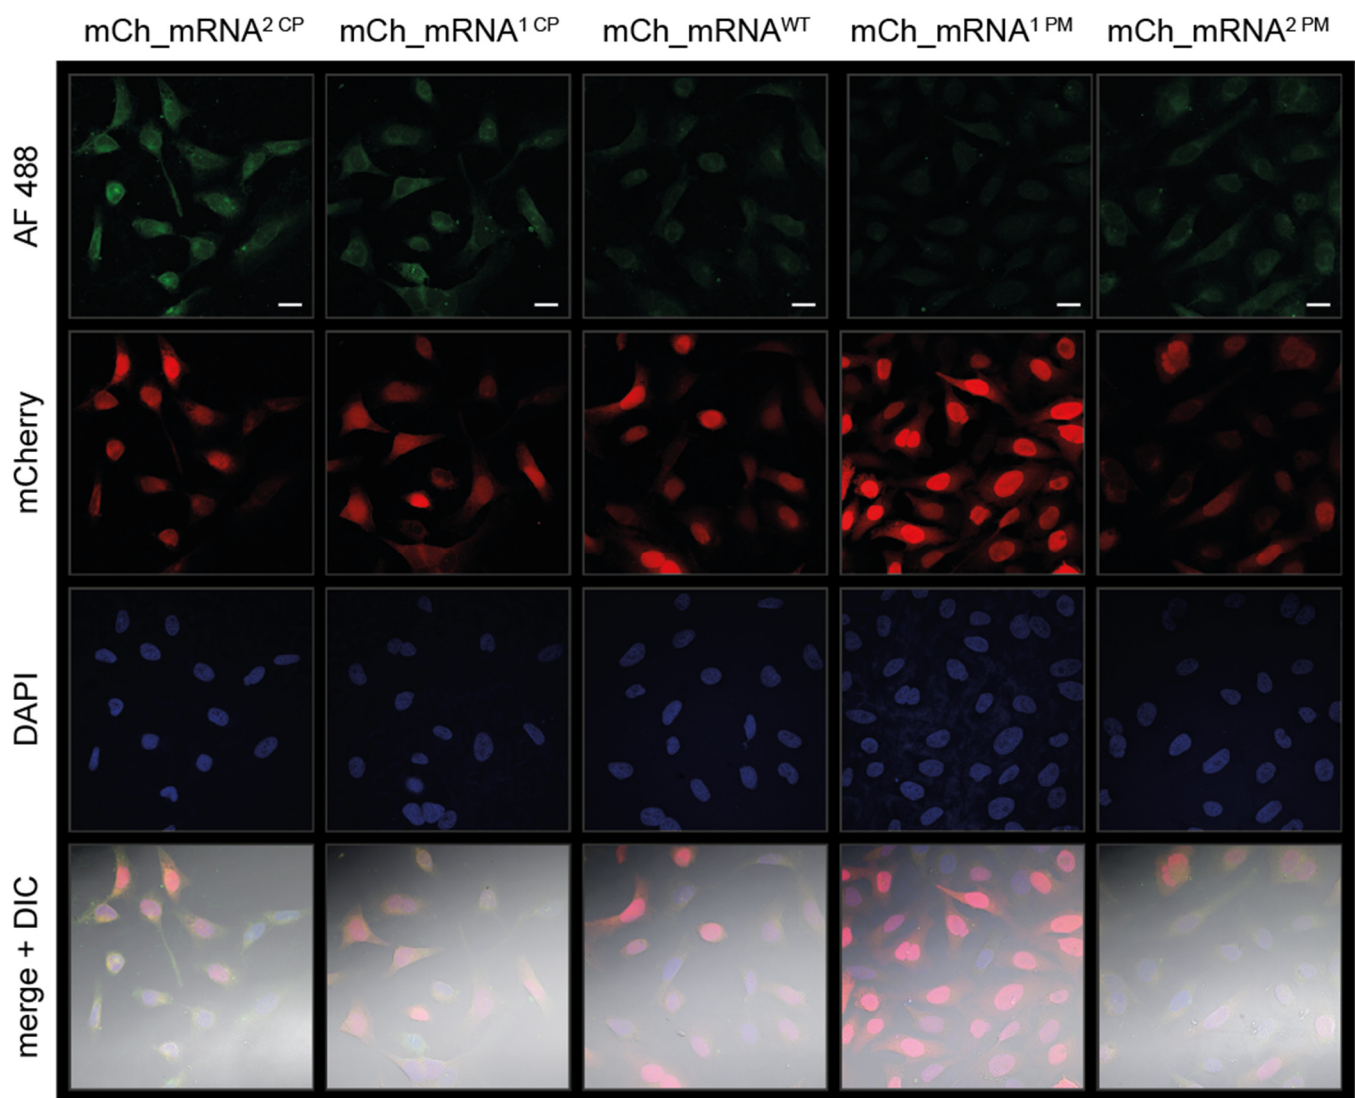

**Supplementary Figure 20.** Confocal fluorescence images of cells transfected with mCh\_mRNA, 24 h post transfection. Excerpts are shown in Figure 3, main text.

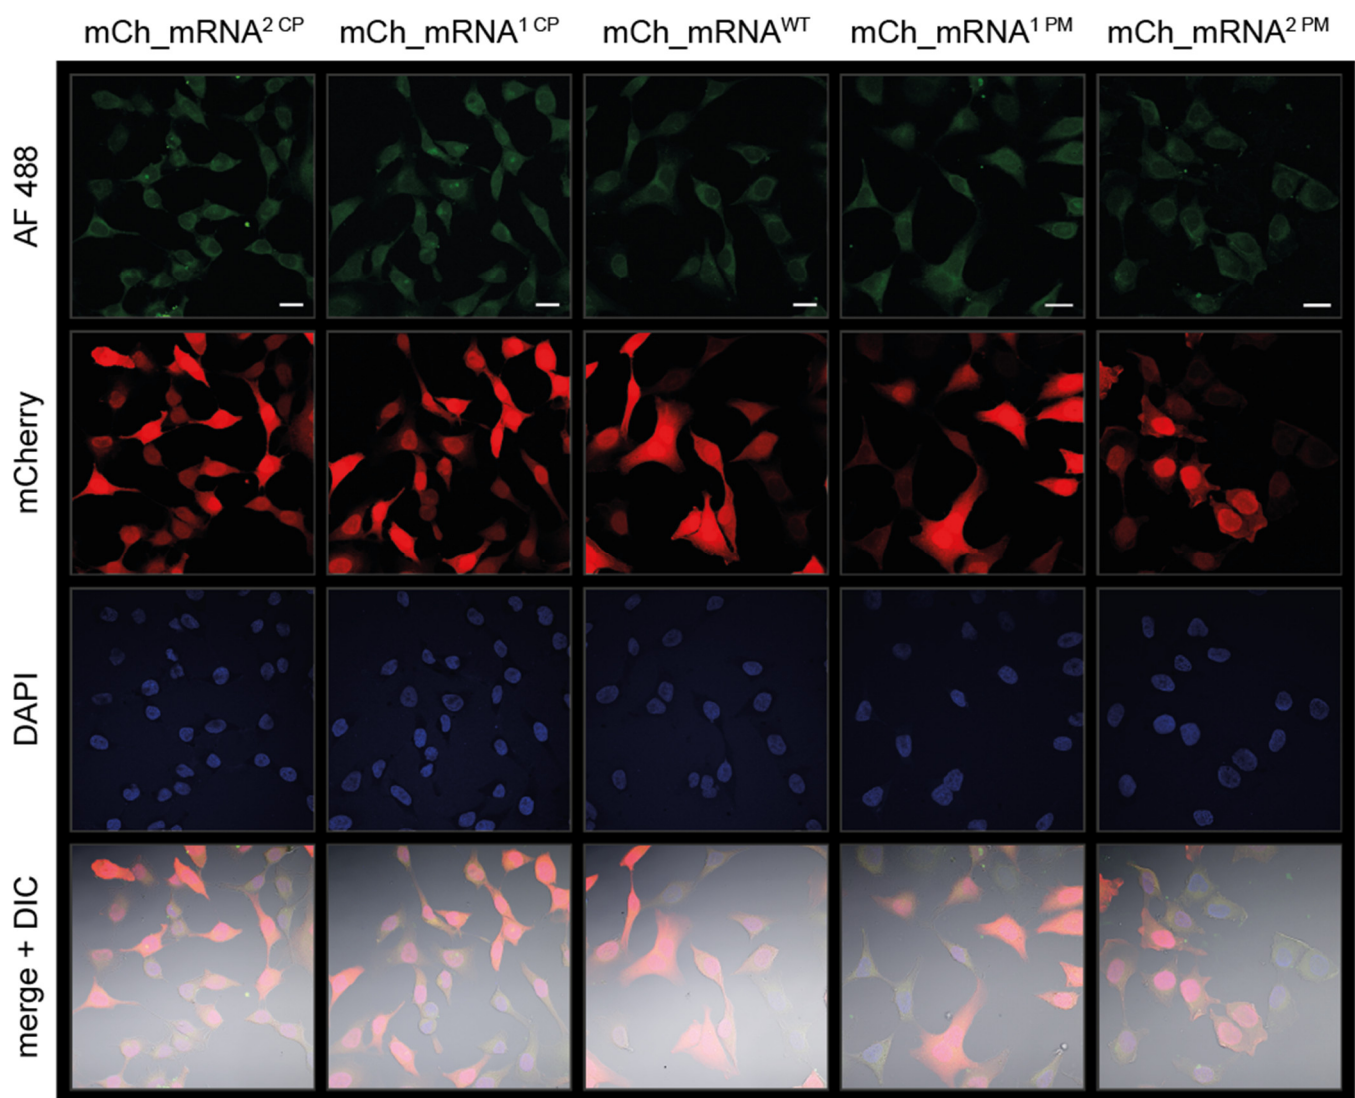

**Supplementary Figure 21.** Confocal fluorescence images of cells transfected with mCh\_mRNA, 48 h post transfection. Excerpts are shown in Figure 3, main text.

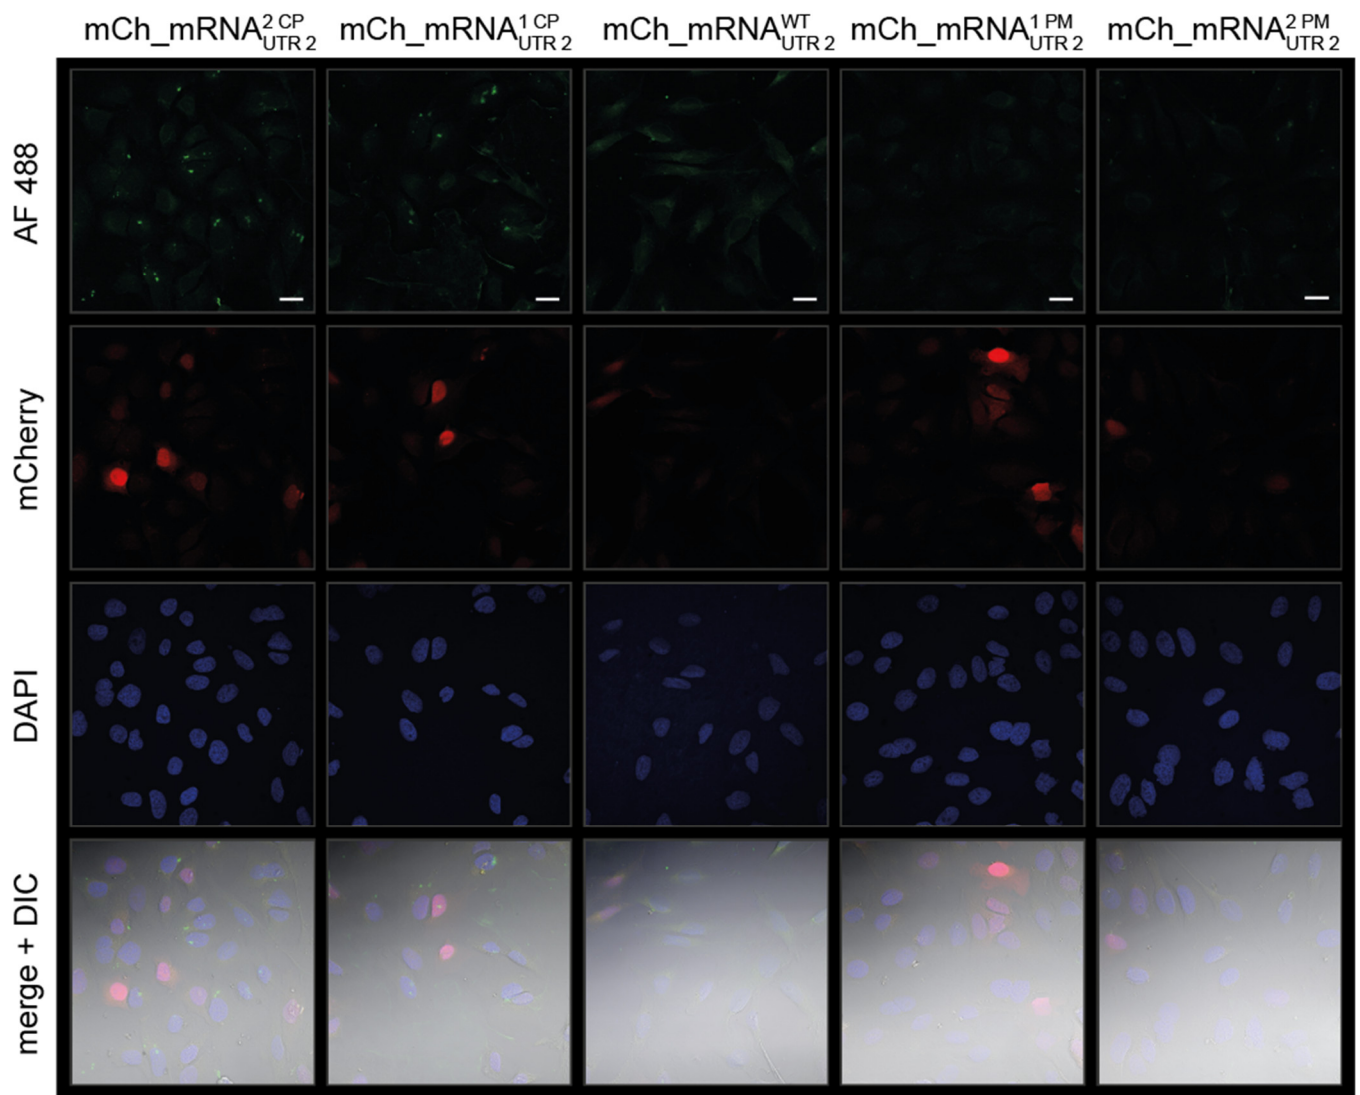

**Supplementary Figure 22.** Confocal fluorescence images of cells transfected with mCh\_mRNA<sub>UTR2</sub>, 6 h post transfection.

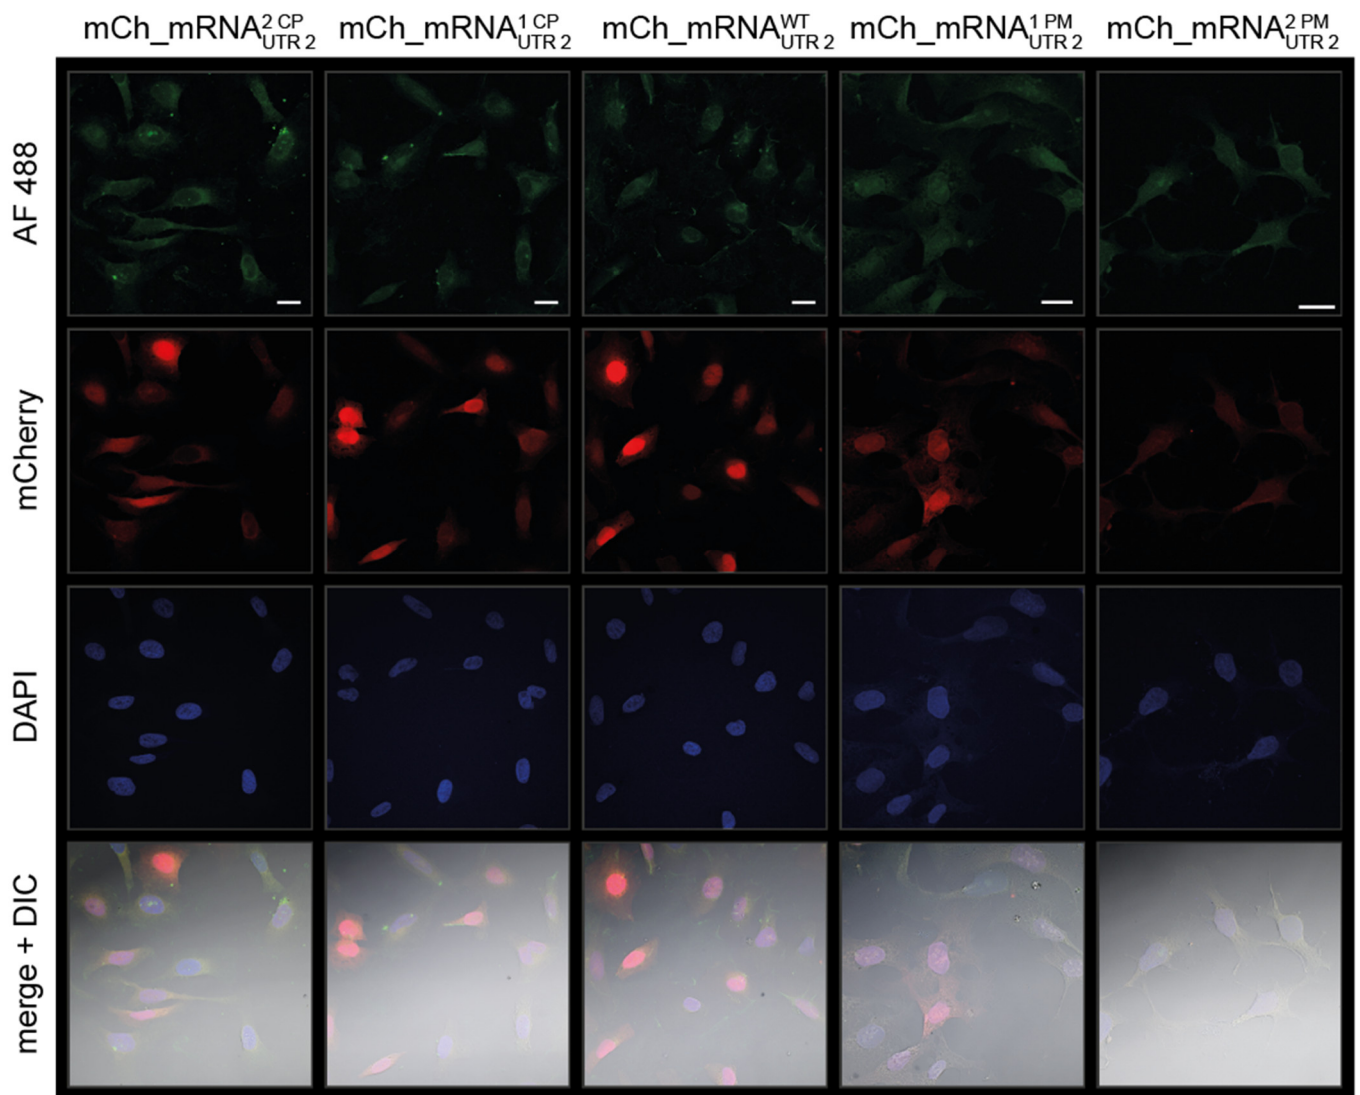

**Supplementary Figure 23.** Confocal fluorescence images of cells transfected with mCh\_mRNA<sub>UTR2</sub>, 24 h post transfection.

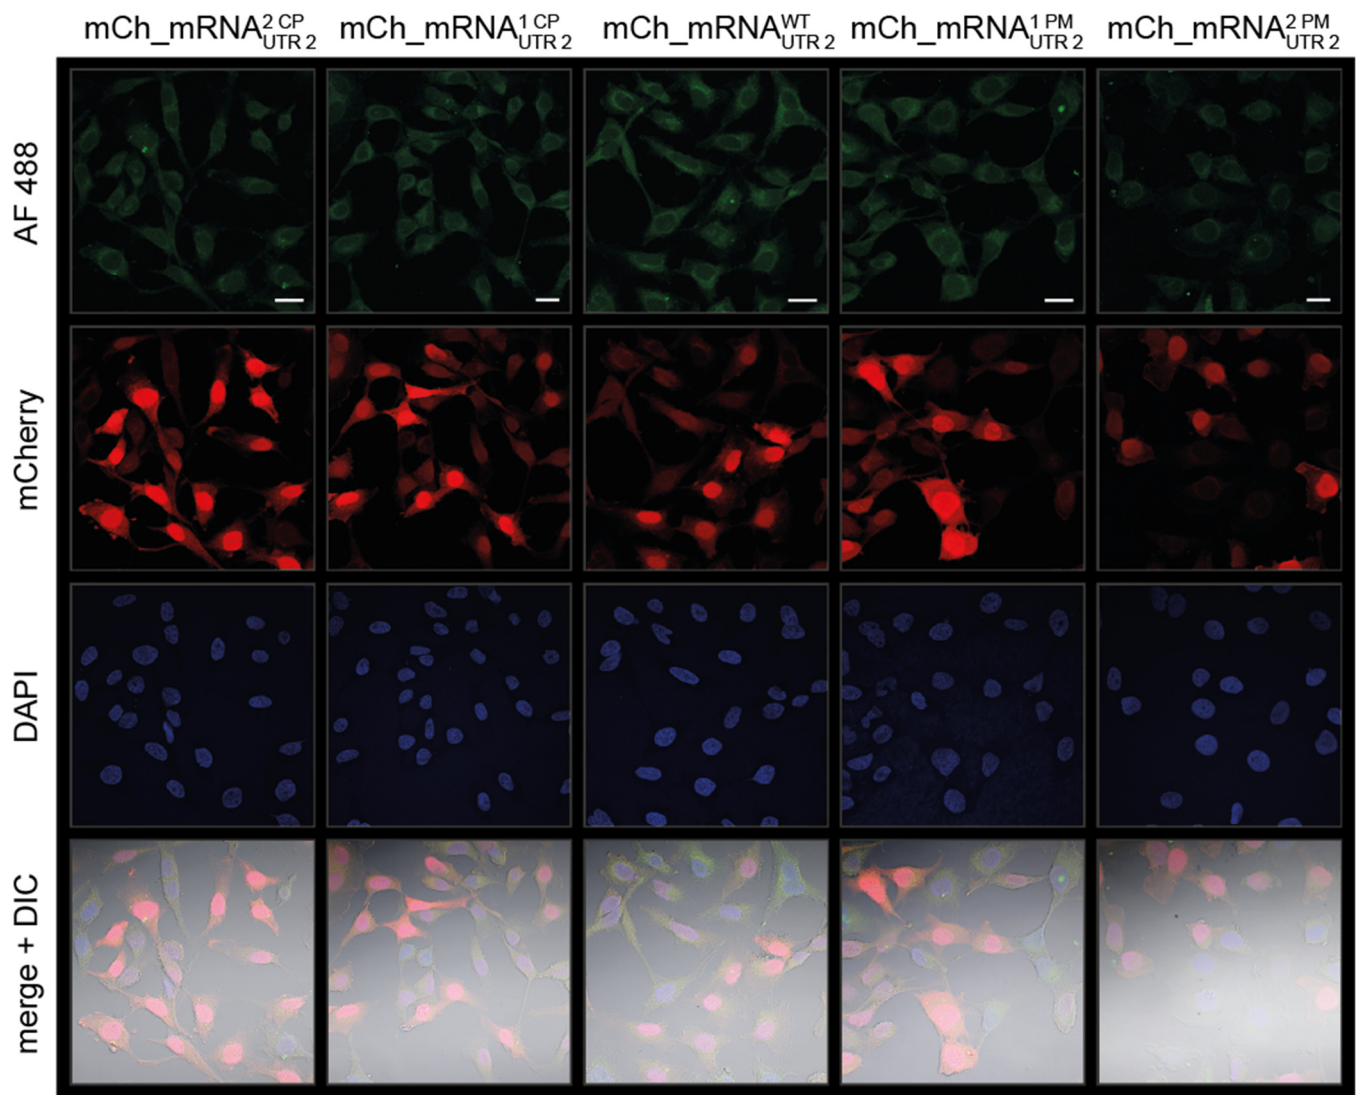

**Supplementary Figure 24.** Confocal fluorescence images of cells transfected with mCh\_mRNA<sub>UTR2</sub>, 48 h post transfection.

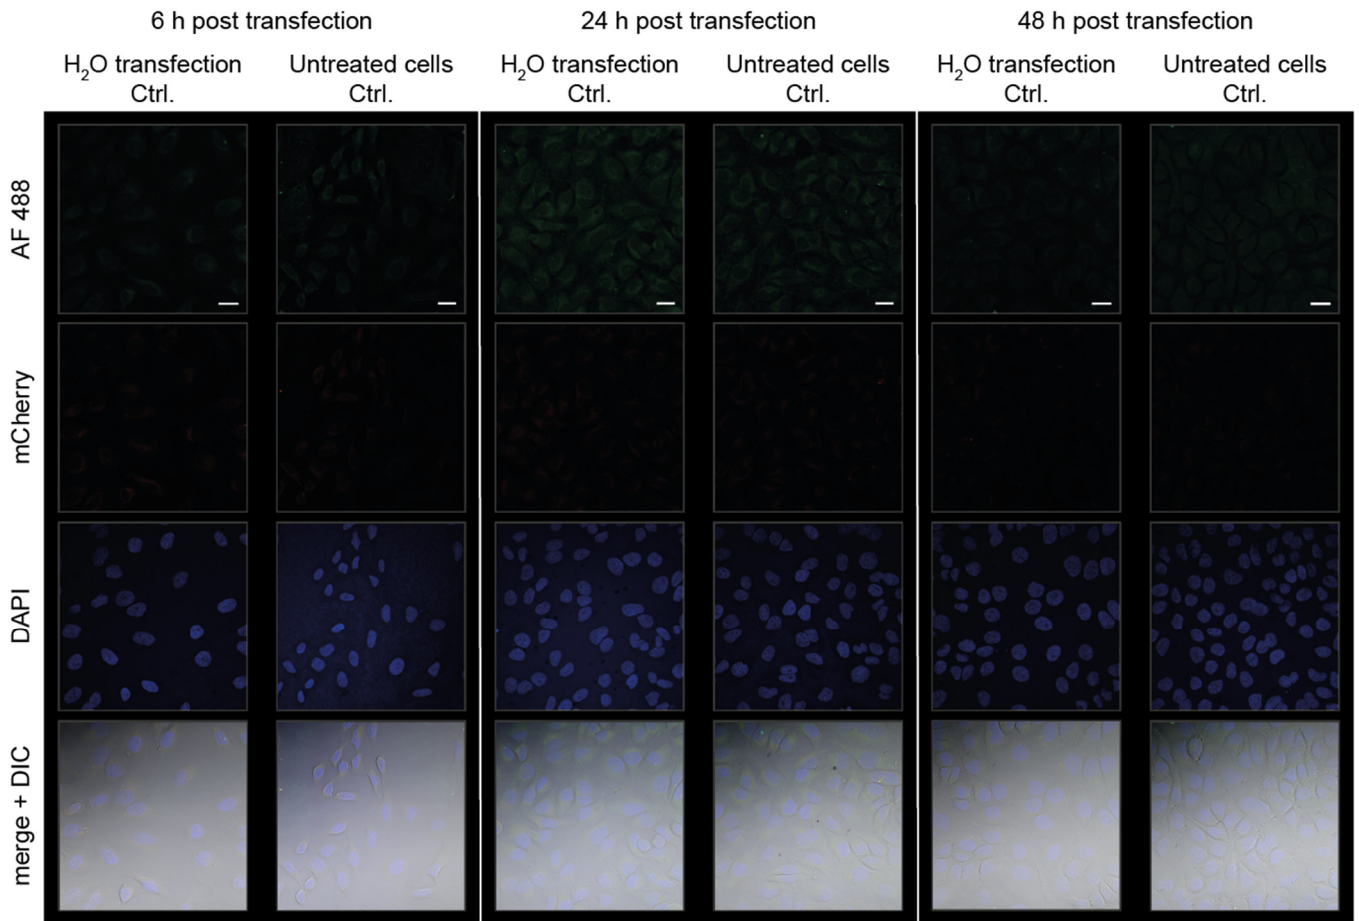

**Supplementary Figure 25.** Confocal fluorescence images of cells transfected with H<sub>2</sub>O instead of mRNA or left untreated, 6, 24 and 48 h post transfection.



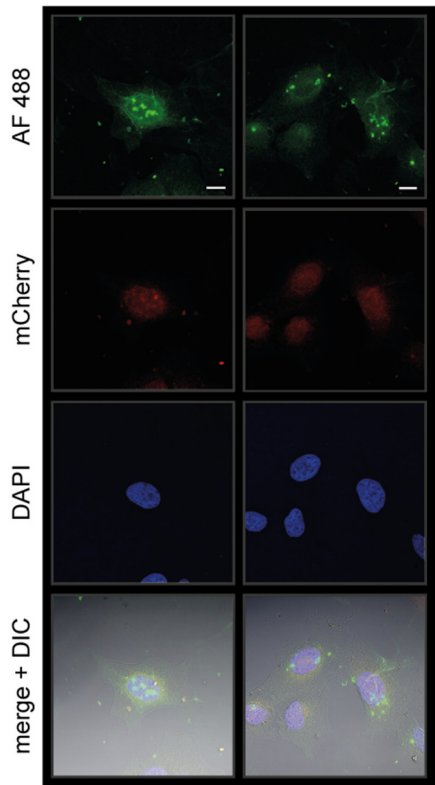

**Supplementary Figure 26.** Close-up images of mCh\_mRNA<sup>2CP</sup>, 6 h post transfection.

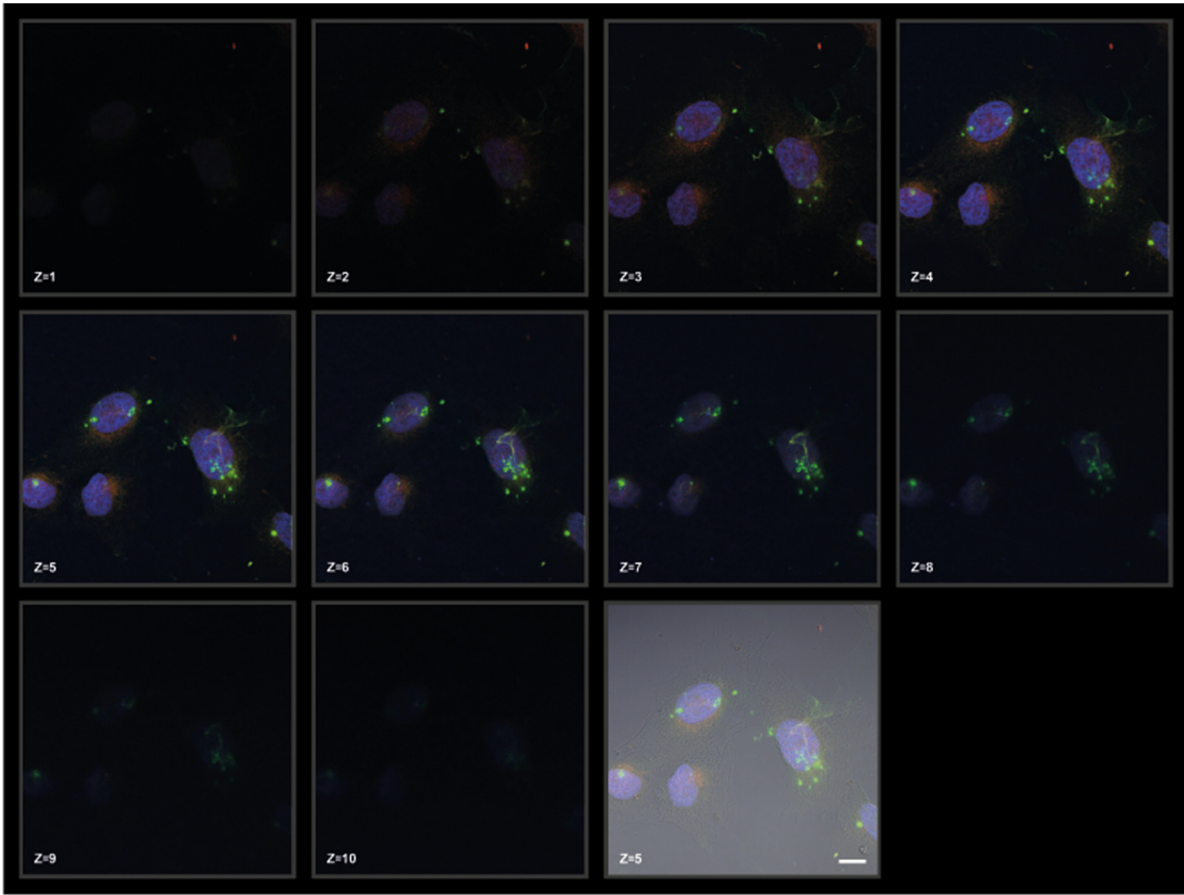

**Supplementary Figure 27.** Z-stack images of mCh\_mRNA<sup>2 CP</sup>, 6 h post transfection.

## RT-qPCR analysis

qPCR was performed in a multiplex assay allowing for simultaneous analysis of mCh\_mRNA at the mRNA 3' end and internal position together with GAPDH and  $\beta$ -Actin mRNA sequences which we choose as reference genes.  $\Delta C_t$  values were calculated using GAPDH as the only reference gene.  $\Delta\Delta C_t$  values were calculated by subtracting the mCh\_mRNA<sup>WT</sup>  $\Delta C_t$  value at 6 h post transfection from all other  $\Delta C_t$  values of variant mCh\_mRNAs and various time points.  $\beta$ -Actin  $C_t$  values were discarded for further data analysis due to lower accuracy in the overall course of experiments. Samples qPCR reaction products for each reaction were analysed by agarose gel electrophoresis. Also, sequences of obtained qPCR products were verified by Sanger sequencing and therefore needed to be extended. First, samples of qPCR products were taken and amplified by standard PCR reactions. PCR amplification was performed separately for all four qPCR amplicon sequences (mCh\_qPCR<sup>internal</sup>, mCh\_qPCR<sup>3'-end</sup>, GAPDH\_qPCR and  $\beta$ -Actin\_qPCR) with 2  $\mu$ L of qPCR product in 100  $\mu$ L scales containing a final concentration of 20 mM Tris-HCl pH 8.9, 22 mM NH<sub>4</sub>Cl, 22 mM KCl, 1.8 mM MgCl<sub>2</sub>, 0.06 % IGEPAL<sup>®</sup> CA-630, 0.05 % Tween<sup>®</sup> 20 (*OneTaq<sup>®</sup> Standard Reaction Buffer, New England Biolabs*), 375  $\mu$ M each canonical dNTP (*Jena Bioscience*), 1  $\mu$ M forward primer (mCh\_qPCR<sup>internal</sup>\_FW or mCh\_qPCR<sup>3'-end</sup>\_FW or GAPDH\_qPCR\_FW or  $\beta$ -Actin\_qPCR\_FW), 1  $\mu$ M reverse primer (mCh\_qPCR<sup>internal</sup>\_RV or mCh\_qPCR<sup>3'-end</sup>\_RV or GAPDH\_qPCR\_RV or  $\beta$ -Actin\_qPCR\_RV) and 0.025 U  $\mu$ L<sup>-1</sup> *OneTaq<sup>®</sup> DNA Polymerase (New England Biolabs)*. PCR was performed with an initial denaturing step at 94 °C for 2 min, followed by 30 cycles of denaturing at 94 °C for 30 s, annealing at 60 °C for 40 s, elongation at 68 °C for 30 s and a final elongation step at 68 °C for 5 min. PCR products were analysed by agarose gel electrophoresis and purified using the *NucleoSpin<sup>®</sup> Gel and PCR Clean-Up Kit (Macherey-Nagel)* according to the manufacturer's protocol. Then, amplified and purified qPCR products were first phosphorylated in a 50  $\mu$ L reaction mix with 2  $\mu$ M qPCR product and containing a final concentration of 70 mM Tris-HCl pH 7.6, 10 mM MgCl<sub>2</sub>, 5 mM DTT (T4 PNK Reaction Buffer, Thermo Fisher Scientific), 1 mM ATP and 0.2 U T4 Polynucleotide Kinase (Thermo Fisher Scientific). Phosphorylation reactions were incubated at 37 °C for 30 min, then heated to 65 °C for 20 min for enzyme inactivation and subsequently purified using a G-25 gel filtration column (GE healthcare) according to the manufacturers' protocol. Phosphorylated qPCR products were lyophilized and resuspended in 10  $\mu$ L ddH<sub>2</sub>O. Next, phosphorylated qPCR products were extended by ligation with a universal adapter and sequence specific splint DNA oligonucleotides (sequences in SI) for each qPCR product (mCh\_qPCR<sup>internal</sup> or mCh\_qPCR<sup>3'-end</sup> or GAPDH\_qPCR or  $\beta$ -Actin\_qPCR). Ligation reactions were performed in a 20  $\mu$ L reaction volume containing 50 mM Tris-HCl pH 7.5, 10 mM MgCl<sub>2</sub>, 1 mM ATP, 10 mM DTT (T4 DNA Ligase Buffer, Thermo Fisher Scientific), 2.5  $\mu$ M qPCR\_adapter DNA oligonucleotide, 2.5  $\mu$ M splint DNA oligonucleotide (mCh\_qPCR<sup>internal</sup>\_splint or mCh\_qPCR<sup>3'-end</sup>\_splint or GAPDH\_qPCR\_splint or  $\beta$ -Actin\_qPCR\_splint), 2.5  $\mu$ M phosphorylated and purified qPCR product (mCh\_qPCR<sup>internal</sup> or mCh\_qPCR<sup>3'-end</sup> or GAPDH\_qPCR or  $\beta$ -Actin\_qPCR) and 40 U T4 DNA Ligase (Thermo Fisher Scientific). Before adding the enzyme, the remaining ligation mix was prepared separately and heated to 95 °C for 2 min, then chilled to 50 °C and incubated for 5 min followed by slow cooling to 16 °C with a cooling rate of 1 °C min<sup>-1</sup>. Then, the T4 DNA Ligase was added, the ligation reaction mix was incubated at 16 °C overnight and finally heated to 65 °C for 10 min for enzyme inactivation. Ligation products were analysed and purified by analytic and preparative agarose gel electrophoresis, before ligated qPCR products were again amplified

via PCR. Amplification of ligated qPCR products was performed individually for each sequence (mCh\_ext-qPCR<sup>internal</sup> or mCh\_ext-qPCR<sup>3'-end</sup> or GAPDH\_ext-qPCR or  $\beta$ -Actin\_ext-qPCR) with 70 ng ligated qPCR product in a 100  $\mu$ L PCR reaction mix containing a final concentration of 20 mM Tris-HCl pH 8.9, 22 mM NH<sub>4</sub>Cl, 22 mM KCl, 1.8 mM MgCl<sub>2</sub>, 0.06 % IGEPAL® CA-630, 0.05 % Tween® 20 (*OneTaq*® Standard Reaction Buffer, *New England Biolabs*), 375  $\mu$ M each canonical dNTP (*Jena Bioscience*), 1  $\mu$ M ext-qPCR\_FW forward primer, 1  $\mu$ M reverse primer (mCh\_ext-qPCR<sup>internal</sup>\_RV or mCh\_ext-qPCR<sup>3'-end</sup>\_RV or GAPDH\_ext-qPCR\_RV or  $\beta$ -Actin\_ext-qPCR\_RV) and 0.025 U  $\mu$ L<sup>-1</sup> *OneTaq*® DNA Polymerase (*New England Biolabs*). PCR was performed with an initial denaturing step at 94 °C for 2 min, followed by 30 cycles of denaturing at 94 °C for 30 s, annealing at 57 °C for 40 s, elongation at 68 °C for 30 s and a final elongation step at 68 °C for 5 min. PCR products were analysed by agarose gel electrophoresis and purified using the *NucleoSpin*® Gel and PCR Clean-Up Kit (*Macherey-Nagel*) according to the manufacturer's protocol.

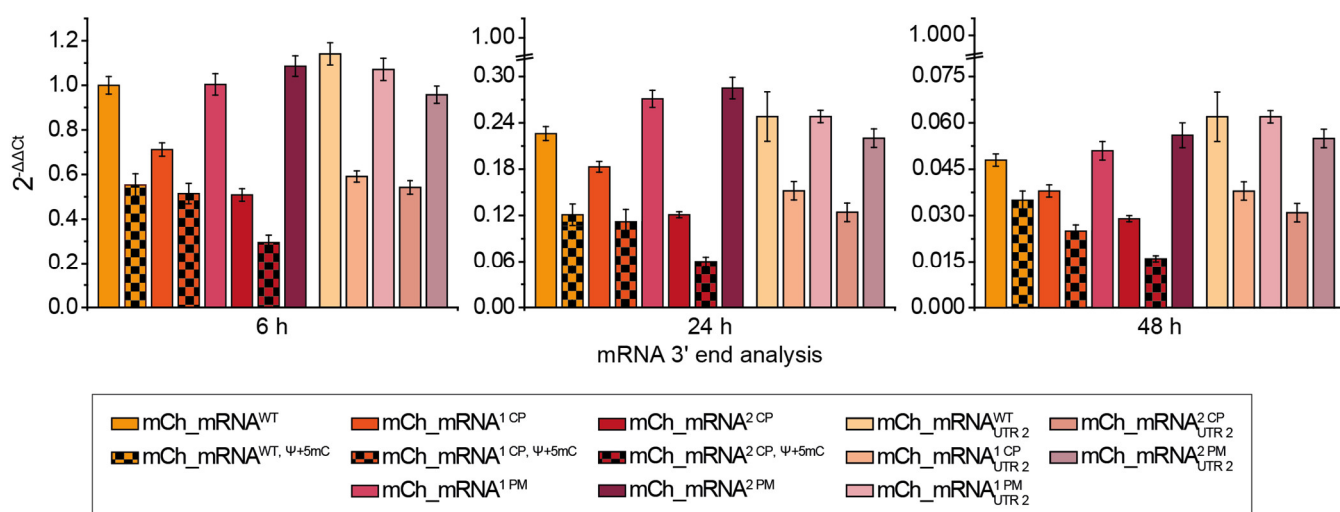

**Supplementary Figure 28.** RT-qPCR analysis at 3'-end section of mCh\_mRNA and mCh\_mRNA<sub>UTR2</sub> sequences. Subsets shown in Figure 4 of the main text.

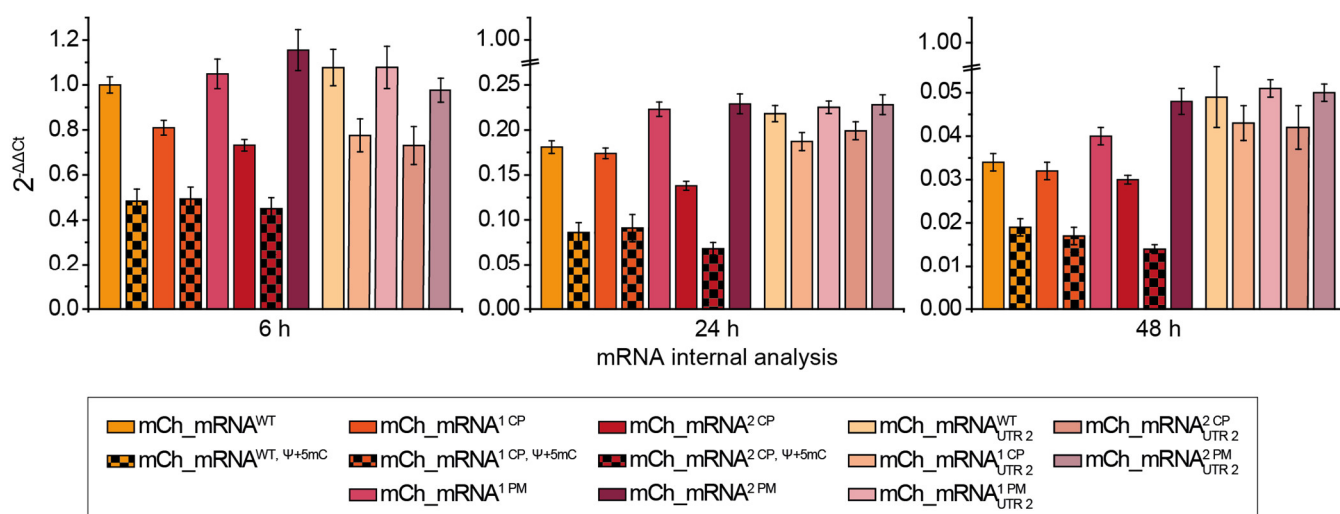

**Supplementary Figure 29.** RT-qPCR analysis at internal section of mCh\_mRNA and mCh\_mRNA<sub>UTR2</sub> sequences. Subsets shown in Figure 4 of the main text.

mCh\_mRNA + mCh\_mRNA<sub>UTR2</sub> data set 1, cell lysis 6 h post transfection

C<sub>t</sub> values

|                         | Duplicate Samples | Technical Triplicats | Ct values       |                   |              |            |
|-------------------------|-------------------|----------------------|-----------------|-------------------|--------------|------------|
|                         |                   |                      | mCh 3' end: FAM | mCh internal: HEX | β-Actin: ROX | GAPDH: Cy5 |
| mCh_mRNA <sup>WT</sup>  | #1                | #1.1                 | 16.45           | 16.43             | 19.04        | 22.21      |
|                         |                   | #1.2                 | 16.32           | 16.32             | 19.02        | 22.15      |
|                         |                   | #1.3                 | 16.29           | 16.35             | 19           | 22.15      |
|                         | #1 NRT            |                      | 36.19           | 34.9              | 0            | 0          |
|                         | #2                | #2.1                 | 16.32           | 16.33             | 17.69        | 22.02      |
|                         |                   | #2.2                 | 16.14           | 16.17             | 18.78        | 22.04      |
|                         |                   | #2.3                 | 16.1            | 16.2              | 18.73        | 21.92      |
|                         | #2 NRT            |                      | 0               | 0                 | 0            | 0          |
|                         | mean              |                      | 16.27           | 16.3              | 18.71        | 22.08      |
|                         | SD                |                      | 0.08            | 0.06              | 0.26         | 0.04       |
| mCh_mRNA <sup>1CP</sup> | #1                | #1.1                 | 16.96           | 16.88             | 17.76        | 21.89      |
|                         |                   | #1.2                 | 16.96           | 16.85             | 20.34        | 21.93      |
|                         |                   | #1.3                 | 16.92           | 16.89             | 18.02        | 21.87      |
|                         | #1 NRT            |                      | 0               | 0                 | 0            | 38.55      |
|                         | #2                | #2.1                 | 16.69           | 16.6              | 20.26        | 21.95      |
|                         |                   | #2.2                 | 16.64           | 16.43             | 20.24        | 21.79      |
|                         |                   | #2.3                 | 16.55           | 16.36             | 17.23        | 21.83      |
|                         | #2 NRT            |                      | 0               | 0                 | 0            | 40.22      |
|                         | mean              |                      | 16.79           | 16.67             | 18.98        | 21.88      |
|                         | SD                |                      | 0.04            | 0.06              | 1.29         | 0.05       |
| mCh_mRNA <sup>2CP</sup> | #1                | #1.1                 | 17.32           | 16.72             | 16.63        | 21.77      |
|                         |                   | #1.2                 | 17.2            | 16.96             | 15.54        | 21.66      |
|                         |                   | #1.3                 | 17.18           | 16.72             | 16.52        | 21.67      |
|                         | #1 NRT            |                      | 0               | 0                 | 0            | 0          |
|                         | #2                | #2.1                 | 17.12           | 16.57             | 16.7         | 21.78      |
|                         |                   | #2.2                 | 17.09           | 16.57             | 16.57        | 21.8       |
|                         |                   | #2.3                 | 17.25           | 16.87             | 15.88        | 21.82      |
|                         | #2 NRT            |                      | 0               | 0                 | 0            | 37.14      |
|                         | mean              |                      | 17.19           | 16.74             | 16.31        | 21.75      |
|                         | SD                |                      | 0.07            | 0.13              | 0.42         | 0.03       |
| mCh_mRNA <sup>1PM</sup> | #1                | #1.1                 | 16.43           | 16.37             | 16.94        | 21.91      |
|                         |                   | #1.2                 | 16.25           | 16.33             | 15.23        | 21.72      |
|                         |                   | #1.3                 | 16.25           | 16.32             | 20.18        | 21.75      |
|                         | #1 NRT            |                      | 0               | 0                 | 0            | 0          |
|                         | #2                | #2.1                 | 16.3            | 16.29             | 20.19        | 21.77      |
|                         |                   | #2.2                 | 16.31           | 16.9              | 15.77        | 21.8       |

|                                              |               |             |       |       |       |       |
|----------------------------------------------|---------------|-------------|-------|-------|-------|-------|
|                                              |               | <b>#2.3</b> | 16.35 | 16.57 | 15.95 | 21.82 |
|                                              | <b>#2 NRT</b> |             | 0     | 0     | 0     | 0     |
|                                              | <b>mean</b>   |             | 16.32 | 16.46 | 17.38 | 21.80 |
|                                              | <b>SD</b>     |             | 0.05  | 0.14  | 2.05  | 0.05  |
| <b>mCh_mRNA<sup>2PM</sup></b>                | <b>#1</b>     | <b>#1.1</b> | 16.33 | 16.6  | 16.61 | 22.01 |
|                                              |               | <b>#1.2</b> | 16.19 | 16.18 | 16.29 | 21.79 |
|                                              |               | <b>#1.3</b> | 16.23 | 16.22 | 17.23 | 21.89 |
|                                              | <b>#1 NRT</b> |             | 0     | 0     | 0     | 41.51 |
|                                              | <b>#2</b>     | <b>#2.1</b> | 16.23 | 16.11 | 16.34 | 21.85 |
|                                              |               | <b>#2.2</b> | 16.23 | 16.54 | 17.16 | 21.89 |
|                                              |               | <b>#2.3</b> | 16.24 | 16.54 | 16.88 | 21.83 |
|                                              | <b>#2 NRT</b> |             | 0     | 0     | 0     | 39.46 |
|                                              | <b>mean</b>   |             | 16.24 | 16.37 | 16.75 | 21.88 |
| <b>SD</b>                                    |               | 0.03        | 0.20  | 0.37  | 0.06  |       |
| <b>mCh_mRNA<sub>UTR2</sub><sup>WT</sup></b>  | <b>#1</b>     | <b>#1.1</b> | 16.06 | 16.28 | 16.77 | 21.86 |
|                                              |               | <b>#1.2</b> | 16.1  | 16.38 | 20.61 | 21.72 |
|                                              |               | <b>#1.3</b> | 16.18 | 16.49 | 17    | 21.86 |
|                                              | <b>#1 NRT</b> |             | 0     | 0     | 0     | 0     |
|                                              | <b>#2</b>     | <b>#2.1</b> | 16.28 | 16.83 | 17.09 | 21.97 |
|                                              |               | <b>#2.2</b> | 16.17 | 17.06 | 17.11 | 21.92 |
|                                              |               | <b>#2.3</b> | 16.14 | 16.36 | 20.75 | 21.86 |
|                                              | <b>#2 NRT</b> |             | 0     | 0     | 0     | 0     |
|                                              | <b>mean</b>   |             | 16.16 | 16.57 | 18.22 | 21.87 |
| <b>SD</b>                                    |               | 0.06        | 0.19  | 1.74  | 0.06  |       |
| <b>mCh_mRNA<sub>UTR2</sub><sup>1CP</sup></b> | <b>#1</b>     | <b>#1.1</b> | 17.06 | 17.12 | 17.27 | 21.83 |
|                                              |               | <b>#1.2</b> | 17.14 | 17.35 | 16.69 | 21.71 |
|                                              |               | <b>#1.3</b> | 17.15 | 17.33 | 15.51 | 21.78 |
|                                              | <b>#1 NRT</b> |             | 0     | 0     | 0     | 38.62 |
|                                              | <b>#2</b>     | <b>#2.1</b> | 16.92 | 17.31 | 15.54 | 21.71 |
|                                              |               | <b>#2.2</b> | 16.77 | 17.11 | 16.08 | 21.65 |
|                                              |               | <b>#2.3</b> | 16.81 | 16.39 | 16.87 | 21.53 |
|                                              | <b>#2 NRT</b> |             | 0     | 0     | 0     | 0     |
|                                              | <b>mean</b>   |             | 16.98 | 17.10 | 16.33 | 21.70 |
| <b>SD</b>                                    |               | 0.05        | 0.25  | 0.64  | 0.06  |       |
| <b>mCh_mRNA<sub>UTR2</sub><sup>2CP</sup></b> | <b>#1</b>     | <b>#1.1</b> | 17.22 | 16.79 | 15.09 | 21.72 |
|                                              |               | <b>#1.2</b> | 17.06 | 16.68 | 14.99 | 21.71 |
|                                              |               | <b>#1.3</b> | 16.98 | 16.66 | 15.62 | 21.65 |
|                                              | <b>#1 NRT</b> |             | 0     | 0     | 0     | 0     |
|                                              | <b>#2</b>     | <b>#2.1</b> | 17.49 | 17.88 | 17.18 | 22.09 |
|                                              |               | <b>#2.2</b> | 17.44 | 18.06 | 15.68 | 22.04 |
|                                              |               | <b>#2.3</b> | 17.21 | 16.77 | 16.56 | 21.82 |

|                                              |               |             |       |       |       |       |
|----------------------------------------------|---------------|-------------|-------|-------|-------|-------|
|                                              | <b>#2 NRT</b> |             | 0     | 0     | 0     | 0     |
|                                              | <b>mean</b>   |             | 17.23 | 17.14 | 15.85 | 21.84 |
|                                              | <b>SD</b>     |             | 0.11  | 0.31  | 0.45  | 0.07  |
| <b>mCh_mRNA<sub>UTR2</sub><sup>1PM</sup></b> | <b>#1</b>     | <b>#1.1</b> | 16.19 | 16.5  | 20.16 | 21.82 |
|                                              |               | <b>#1.2</b> | 16.2  | 16.32 | 15.48 | 21.67 |
|                                              |               | <b>#1.3</b> | 16.19 | 16.15 | 16.72 | 21.69 |
|                                              | <b>#1 NRT</b> |             | 0     | 0     | 0     | 38.66 |
|                                              | <b>#2</b>     | <b>#2.1</b> | 16.24 | 16.34 | 16.27 | 21.8  |
|                                              |               | <b>#2.2</b> | 16.23 | 16.86 | 14.61 | 21.79 |
|                                              |               | <b>#2.3</b> | 16.18 | 16.3  | 16.35 | 21.78 |
|                                              | <b>#2 NRT</b> |             | 0     | 0     | 0     | 0     |
|                                              | <b>mean</b>   |             | 16.21 | 16.41 | 16.60 | 21.76 |
|                                              | <b>SD</b>     |             | 0.02  | 0.20  | 1.39  | 0.04  |
| <b>mCh_mRNA<sub>UTR2</sub><sup>2PM</sup></b> | <b>#1</b>     | <b>#1.1</b> | 16.54 | 16.86 | 16.11 | 21.82 |
|                                              |               | <b>#1.2</b> | 16.47 | 16.61 | 16.23 | 21.77 |
|                                              |               | <b>#1.3</b> | 16.44 | 17.02 | 16.96 | 21.71 |
|                                              | <b>#1 NRT</b> |             | 0     | 0     | 0     | 35.67 |
|                                              | <b>#2</b>     | <b>#2.1</b> | 16.48 | 16.56 | 16.19 | 21.69 |
|                                              |               | <b>#2.2</b> | 16.4  | 16.51 | 15.35 | 21.7  |
|                                              |               | <b>#2.3</b> | 16.43 | 16.62 | 15.51 | 21.73 |
|                                              | <b>#2 NRT</b> |             | 0     | 0     | 0     | 0     |
|                                              | <b>mean</b>   |             | 16.46 | 16.70 | 16.06 | 21.74 |
|                                              | <b>SD</b>     |             | 0.04  | 0.11  | 0.37  | 0.03  |
| <b>H<sub>2</sub>O Ctrl.</b>                  | <b>#1</b>     | <b>#1.1</b> | 0     | 0     | 18.77 | 21.57 |
|                                              |               | <b>#1.2</b> | 0     | 0     | 16.8  | 21.54 |
|                                              | <b>#1 NRT</b> |             | 0     | 0     | 0     | 41.76 |
|                                              | <b>#2</b>     | <b>#2.1</b> | 0     | 0     | 15.84 | 21.41 |
|                                              |               | <b>#2.2</b> | 0     | 0     | 16.66 | 21.38 |
|                                              | <b>#2 NRT</b> |             | 0     | 0     | 0     | 37.91 |
|                                              | <b>mean</b>   |             | 0     | 0     | 17.02 | 21.48 |
|                                              | <b>SD</b>     |             | 0     | 0     | 0.70  | 0.02  |
| <b>Untreated Cells</b>                       | <b>#1</b>     | <b>#1.1</b> | 0     | 0     | 17.89 | 21.64 |
|                                              |               | <b>#1.2</b> | 0     | 0     | 15.7  | 21.47 |
|                                              |               | <b>#1.3</b> | 0     | 0     | 15.66 | 21.47 |
|                                              | <b>#1 NRT</b> |             | 0     | 0     | 0     | 39.81 |
|                                              | <b>#2</b>     | <b>#2.1</b> | 0     | 0     | 16.46 | 21.45 |
|                                              |               | <b>#2.2</b> | 0     | 0     | 15.65 | 21.43 |
|                                              |               | <b>#2.3</b> | 0     | 0     | 15.46 | 21.41 |
|                                              | <b>#2 NRT</b> |             | 0     | 0     | 0     | 0     |
|                                              | <b>mean</b>   |             | 0     | 0     | 16.14 | 21.48 |
|                                              | <b>SD</b>     |             | 0     | 0     | 0.74  | 0.05  |
| <b>NTC</b>                                   | <b>#1</b>     |             | 0     | 0     | 0     | 0     |
|                                              | <b>#2</b>     |             | 0     | 0     | 0     | 0     |

$$\Delta C_t = C_t(\text{mCh}) - C_t(\text{GAPDH})$$

|                                          | $\Delta C_t$<br>(mCh 3'end) | error | $\Delta C_t$<br>(mCh internal) | error |
|------------------------------------------|-----------------------------|-------|--------------------------------|-------|
| mCh_mRNA <sup>WT</sup>                   | -5.81                       | 0.09  | -5.78                          | 0.07  |
| mCh_mRNA <sup>1 CP</sup>                 | -5.09                       | 0.06  | -5.21                          | 0.08  |
| mCh_mRNA <sup>2 CP</sup>                 | -4.56                       | 0.07  | -5.02                          | 0.13  |
| mCh_mRNA <sup>1 PM</sup>                 | -5.48                       | 0.07  | -5.33                          | 0.15  |
| mCh_mRNA <sup>2 PM</sup>                 | -5.64                       | 0.07  | -5.51                          | 0.20  |
| mCh_mRNA <sub>UTR2</sub> <sup>WT</sup>   | -5.71                       | 0.08  | -5.30                          | 0.20  |
| mCh_mRNA <sub>UTR2</sub> <sup>1 CP</sup> | -4.73                       | 0.08  | -4.60                          | 0.26  |
| mCh_mRNA <sub>UTR2</sub> <sup>2 CP</sup> | -4.61                       | 0.13  | -4.70                          | 0.32  |
| mCh_mRNA <sub>UTR2</sub> <sup>1 PM</sup> | -5.55                       | 0.04  | -5.35                          | 0.20  |
| mCh_mRNA <sub>UTR2</sub> <sup>2 PM</sup> | -5.28                       | 0.05  | -5.04                          | 0.11  |
| H <sub>2</sub> O Ctrl.                   | -21.48                      | 0.02  | -21.48                         | 0.02  |
| Untreated cells                          | -21.48                      | 0.05  | -21.48                         | 0.05  |

### mCh\_mRNA + mCh\_mRNA<sub>UTR2</sub> data set 1, cell lysis 24 h post transfection

#### C<sub>t</sub> values

|                          | Duplicate Samples | Technical Triplicats | Ct values          |                      |                     |            |
|--------------------------|-------------------|----------------------|--------------------|----------------------|---------------------|------------|
|                          |                   |                      | mCh 3' end:<br>FAM | mCh internal:<br>HEX | $\beta$ -Actin: ROX | GAPDH: Cy5 |
| mCh_mRNA <sup>WT</sup>   | #1                | #1.1                 | 18.7               | 19.1                 | 19.15               | 21.71      |
|                          |                   | #1.2                 | 18.54              | 19.1                 | 19.44               | 21.75      |
|                          |                   | #1.3                 | 18.54              | 19.09                | 19.17               | 21.73      |
|                          | #1 NRT            |                      | 0                  | 0                    | 0                   | 0          |
|                          | #2                | #2.1                 | 19.02              | 19.59                | 19.92               | 22.37      |
|                          |                   | #2.2                 | 18.9               | 19.62                | 19.17               | 22.33      |
|                          |                   | #2.3                 | 18.95              | 19.56                | 19.01               | 22.39      |
|                          | #2 NRT            |                      | 0                  | 0                    | 0                   | 0          |
|                          | mean              |                      | 18.78              | 19.34                | 19.31               | 22.05      |
| SD                       |                   | 0.06                 | 0.01               | 0.26                 | 0.02                |            |
| mCh_mRNA <sup>1 CP</sup> | #1                | #1.1                 | 19.2               | 19.49                | 19.43               | 21.79      |
|                          |                   | #1.2                 | 19.16              | 19.48                | 18.99               | 21.75      |
|                          |                   | #1.3                 | 19.02              | 19.44                | 19.19               | 21.72      |
|                          | #1 NRT            |                      | 0                  | 0                    | 0                   | 0          |
|                          | #2                | #2.1                 | 19.21              | 19.52                | 18.66               | 21.84      |
|                          |                   | #2.2                 | 19.1               | 19.6                 | 19.24               | 21.92      |
|                          |                   | #2.3                 | 19.17              | 19.59                | 19.18               | 21.9       |
|                          | #2 NRT            |                      | 0                  | 0                    | 0                   | 36.91      |
|                          | mean              |                      | 19.14              | 19.52                | 19.12               | 21.82      |



|                                             |               |             |       |       |       |       |
|---------------------------------------------|---------------|-------------|-------|-------|-------|-------|
|                                             | <b>SD</b>     |             | 0.06  | 0.03  | 0.22  | 0.03  |
| <b>mCh_mRNA<sup>2 CP</sup></b>              | <b>#1</b>     | <b>#1.1</b> | 19.8  | 19.82 | 19.25 | 21.88 |
|                                             |               | <b>#1.2</b> | 19.72 | 20.07 | 19.44 | 21.81 |
|                                             |               | <b>#1.3</b> | 19.75 | 19.95 | 18.26 | 21.83 |
|                                             | <b>#1 NRT</b> |             | 0     | 0     | 0     | 39.9  |
|                                             | <b>#2</b>     | <b>#2.1</b> | 19.7  | 19.83 | 18.61 | 21.82 |
|                                             |               | <b>#2.2</b> | 19.59 | 19.9  | 18.86 | 21.74 |
|                                             |               | <b>#2.3</b> | 19.59 | 19.92 | 18.81 | 21.72 |
|                                             | <b>#2 NRT</b> |             | 0     | 0     | 0     | 0     |
|                                             | <b>mean</b>   |             | 19.69 | 19.92 | 18.87 | 21.80 |
|                                             | <b>SD</b>     |             | 0.04  | 0.07  | 0.31  | 0.04  |
| <b>mCh_mRNA<sup>1 PM</sup></b>              | <b>#1</b>     | <b>#1.1</b> | 18.82 | 19.27 | 19.57 | 21.98 |
|                                             |               | <b>#1.2</b> | 18.69 | 19.29 | 18.76 | 21.91 |
|                                             |               | <b>#1.3</b> | 18.72 | 19.29 | 18.43 | 21.89 |
|                                             | <b>#1 NRT</b> |             | 0     | 0     | 0     | 0     |
|                                             | <b>#2</b>     | <b>#2.1</b> | 18.76 | 19.29 | 19.22 | 22.05 |
|                                             |               | <b>#2.2</b> | 18.68 | 19.28 | 18.71 | 22    |
|                                             |               | <b>#2.3</b> | 18.7  | 19.24 | 18.43 | 22.04 |
|                                             | <b>#2 NRT</b> |             | 0     | 0     | 0     | 41.58 |
|                                             | <b>mean</b>   |             | 18.73 | 19.28 | 18.85 | 21.98 |
|                                             | <b>SD</b>     |             | 0.04  | 0.02  | 0.40  | 0.03  |
| <b>mCh_mRNA<sup>2 PM</sup></b>              | <b>#1</b>     | <b>#1.1</b> | 18.7  | 19.2  | 19.05 | 21.86 |
|                                             |               | <b>#1.2</b> | 18.52 | 19.07 | 18.12 | 21.71 |
|                                             |               | <b>#1.3</b> | 18.58 | 19.11 | 18.67 | 21.75 |
|                                             | <b>#1 NRT</b> |             | 0     | 0     | 0     | 38.95 |
|                                             | <b>#2</b>     | <b>#2.1</b> | 18.78 | 19.32 | 19.18 | 22.04 |
|                                             |               | <b>#2.2</b> | 18.64 | 19.21 | 19.02 | 22    |
|                                             |               | <b>#2.3</b> | 18.62 | 19.26 | 18.94 | 21.96 |
|                                             | <b>#2 NRT</b> |             | 0     | 39.72 | 0     | 37.18 |
|                                             | <b>mean</b>   |             | 18.64 | 19.20 | 18.83 | 21.89 |
|                                             | <b>SD</b>     |             | 0.07  | 0.05  | 0.24  | 0.05  |
| <b>mCh_mRNA<sub>UTR2</sub><sup>WT</sup></b> | <b>#1</b>     | <b>#1.1</b> | 18.65 | 19.17 | 17.69 | 21.78 |
|                                             |               | <b>#1.2</b> | 18.56 | 19.15 | 18.56 | 21.73 |
|                                             |               | <b>#1.3</b> | 18.6  | 19.13 | 18.71 | 21.76 |
|                                             | <b>#1 NRT</b> |             | 0     | 0     | 0     | 0     |
|                                             | <b>#2</b>     | <b>#2.1</b> | 18.42 | 18.91 | 18.27 | 21.69 |
|                                             |               | <b>#2.2</b> | 18.42 | 19.09 | 18.11 | 21.73 |
|                                             |               | <b>#2.3</b> | 18.33 | 18.83 | 18.65 | 21.66 |
|                                             | <b>#2 NRT</b> |             | 0     | 0     | 0     | 0     |
|                                             | <b>mean</b>   |             | 18.50 | 19.05 | 18.33 | 21.73 |
|                                             | <b>SD</b>     |             | 0.04  | 0.06  | 0.34  | 0.02  |

|                                          |        |      |       |       |       |       |
|------------------------------------------|--------|------|-------|-------|-------|-------|
| mCh_mRNA <sub>UTR2</sub> <sup>1 CP</sup> | #1     | #1.1 | 19.51 | 19.47 | 19.54 | 22.01 |
|                                          |        | #1.2 | 19.27 | 19.21 | 18.55 | 21.74 |
|                                          |        | #1.3 | 19.28 | 19.19 | 17.51 | 21.74 |
|                                          | #1 NRT |      | 0     | 0     | 0     | 0     |
|                                          | #2     | #2.1 | 19.35 | 19.24 | 18.53 | 21.73 |
|                                          |        | #2.2 | 19.3  | 19.21 | 18.02 | 21.71 |
|                                          |        | #2.3 | 19.3  | 19.24 | 18.56 | 21.74 |
|                                          | #2 NRT |      | 0     | 0     | 0     | 0     |
|                                          | mean   |      | 19.34 | 19.26 | 18.45 | 21.78 |
|                                          | SD     |      | 0.07  | 0.07  | 0.54  | 0.07  |
| mCh_mRNA <sub>UTR2</sub> <sup>2 CP</sup> | #1     | #1.1 | 19.59 | 19.45 | 19.02 | 21.92 |
|                                          |        | #1.2 | 19.5  | 19.36 | 18.16 | 21.84 |
|                                          |        | #1.3 | 19.44 | 19.22 | 18.55 | 21.76 |
|                                          | #1 NRT |      | 0     | 0     | 0     | 0     |
|                                          | #2     | #2.1 | 19.67 | 19.44 | 18.84 | 21.89 |
|                                          |        | #2.2 | 19.62 | 19.46 | 18.8  | 21.86 |
|                                          |        | #2.3 | 19.62 | 19.6  | 17.74 | 21.89 |
|                                          | #2 NRT |      | 0     | 0     | 0     | 40.95 |
|                                          | mean   |      | 19.57 | 19.42 | 18.52 | 21.86 |
|                                          | SD     |      | 0.04  | 0.08  | 0.43  | 0.04  |
| mCh_mRNA <sub>UTR2</sub> <sup>1 PM</sup> | #1     | #1.1 | 18.64 | 19.14 | 19.31 | 21.92 |
|                                          |        | #1.2 | 18.53 | 19.04 | 18.64 | 21.85 |
|                                          |        | #1.3 | 18.52 | 19.09 | 19.12 | 21.81 |
|                                          | #1 NRT |      | 0     | 0     | 0     | 37.4  |
|                                          | #2     | #2.1 | 18.73 | 19.22 | 19.51 | 22    |
|                                          |        | #2.2 | 18.62 | 19.19 | 18.31 | 21.94 |
|                                          |        | #2.3 | 18.61 | 19.19 | 19.16 | 21.95 |
|                                          | #2 NRT |      | 0     | 0     | 0     | 38.98 |
|                                          | mean   |      | 18.61 | 19.15 | 19.01 | 21.91 |
|                                          | SD     |      | 0.05  | 0.03  | 0.39  | 0.04  |
| mCh_mRNA <sub>UTR2</sub> <sup>2 PM</sup> | #1     | #1.1 | 18.74 | 19.12 | 18.92 | 21.94 |
|                                          |        | #1.2 | 18.75 | 19.19 | 18.67 | 21.94 |
|                                          |        | #1.3 | 18.65 | 19.04 | 18.17 | 21.83 |
|                                          | #1 NRT |      | 0     | 0     | 0     | 0     |
|                                          | #2     | #2.1 | 18.66 | 19.05 | 17.87 | 21.71 |
|                                          |        | #2.2 | 18.8  | 19.23 | 18.3  | 22    |
|                                          |        | #2.3 | 18.67 | 19.13 | 19.03 | 21.9  |
|                                          | #2 NRT |      | 0     | 0     | 0     | 40.25 |
|                                          | mean   |      | 18.71 | 19.13 | 18.49 | 21.89 |
|                                          | SD     |      | 0.05  | 0.07  | 0.40  | 0.09  |
| H <sub>2</sub> O Ctrl.                   | #1     | #1.1 | 0     | 0     | 20.43 | 22.02 |
|                                          |        | #1.2 | 0     | 0     | 18.88 | 21.93 |
|                                          | #1 NRT |      | 0     | 0     | 0     | 0     |

|                 |        |      |      |      |       |       |
|-----------------|--------|------|------|------|-------|-------|
|                 | #2     | #2.1 | 0    | 0    | 18.11 | 21.84 |
|                 |        | #2.2 | 0    | 0    | 18.62 | 21.67 |
|                 | #2 NRT |      | 0    | 0    | 0     | 0     |
|                 | mean   |      | 0.00 | 0.00 | 19.01 | 21.87 |
|                 | SD     |      | 0.00 | 0.00 | 0.52  | 0.06  |
| Untreated Cells | #1     | #1.1 | 0    | 0    | 19.73 | 21.87 |
|                 |        | #1.2 | 0    | 0    | 19.03 | 21.9  |
|                 |        | #1.3 | 0    | 0    | 19.01 | 21.82 |
|                 | #1 NRT |      | 0    | 0    | 0     | 0     |
|                 | #2     | #2.1 | 0    | 0    | 18.33 | 21.93 |
|                 |        | #2.2 | 0    | 0    | 19.38 | 21.86 |
|                 |        | #2.3 | 0    | 0    | 18.8  | 21.88 |
|                 | #2 NRT |      | 0    | 0    | 0     | 0     |
|                 | mean   |      | 0.00 | 0.00 | 19.05 | 21.88 |
|                 | SD     |      | 0.00 | 0.00 | 0.38  | 0.03  |
| NTC             | #1     |      | 0    | 0    | 0     | 0     |
|                 | #2     |      | 0    | 0    | 0     | 0     |

$$\Delta C_t = C_t(\text{mCh}) - C_t(\text{GAPDH})$$

|                                          | $\Delta C_t$<br>(mCh 3'end) | error | $\Delta C_t$<br>(mCh internal) | error |
|------------------------------------------|-----------------------------|-------|--------------------------------|-------|
| mCh_mRNA <sup>WT</sup>                   | -3.27                       | 0.07  | -2.70                          | 0.03  |
| mCh_mRNA <sup>1 CP</sup>                 | -2.68                       | 0.07  | -2.30                          | 0.04  |
| mCh_mRNA <sup>2 CP</sup>                 | -2.11                       | 0.06  | -1.89                          | 0.08  |
| mCh_mRNA <sup>1 PM</sup>                 | -3.25                       | 0.05  | -2.70                          | 0.03  |
| mCh_mRNA <sup>2 PM</sup>                 | -3.25                       | 0.09  | -2.69                          | 0.07  |
| mCh_mRNA <sub>UTR2</sub> <sup>WT</sup>   | -3.23                       | 0.05  | -2.68                          | 0.07  |
| mCh_mRNA <sub>UTR2</sub> <sup>1 CP</sup> | -2.44                       | 0.10  | -2.52                          | 0.10  |
| mCh_mRNA <sub>UTR2</sub> <sup>2 CP</sup> | -2.29                       | 0.06  | -2.44                          | 0.09  |
| mCh_mRNA <sub>UTR2</sub> <sup>1 PM</sup> | -3.30                       | 0.07  | -2.77                          | 0.05  |
| mCh_mRNA <sub>UTR2</sub> <sup>2 PM</sup> | -3.18                       | 0.10  | -2.76                          | 0.11  |
| H <sub>2</sub> O Ctrl.                   | -21.87                      | 0.06  | -21.87                         | 0.06  |
| Untreated cells                          | -21.88                      | 0.03  | -21.88                         | 0.03  |

### mCh\_mRNA + mCh\_mRNA<sub>UTR2</sub> data set 1, cell lysis 48 h post transfection

#### C<sub>t</sub> values

|                        | Duplicate Samples | Technical Triplicats | Ct values          |                      |                     |            |
|------------------------|-------------------|----------------------|--------------------|----------------------|---------------------|------------|
|                        |                   |                      | mCh 3' end:<br>FAM | mCh internal:<br>HEX | $\beta$ -Actin: ROX | GAPDH: Cy5 |
| mCh_mRNA <sup>WT</sup> | #1                | #1.1                 | 20.92              | 21.5                 | 19.65               | 21.68      |
|                        |                   | #1.2                 | 21.25              | 21.74                | 19.65               | 22.1       |

|                               |               |             |       |       |       |       |
|-------------------------------|---------------|-------------|-------|-------|-------|-------|
|                               |               | <b>#1.3</b> | 21.17 | 21.66 | 19.7  | 22.01 |
|                               | <b>#1 NRT</b> |             | 0     | 0     | 0     | 0     |
|                               | <b>#2</b>     | <b>#2.1</b> | 21.47 | 22.07 | 20.17 | 22.14 |
|                               |               | <b>#2.2</b> | 21.27 | 21.85 | 19    | 21.94 |
|                               |               | <b>#2.3</b> | 21.2  | 21.82 | 18.56 | 21.91 |
|                               | <b>#2 NRT</b> |             | 38.33 | 40.72 | 30.2  | 31.91 |
|                               | <b>mean</b>   |             | 21.21 | 21.77 | 19.46 | 21.96 |
|                               | <b>SD</b>     |             | 0.13  | 0.11  | 0.35  | 0.14  |
| <b>mCh_mRNA<sup>1CP</sup></b> | <b>#1</b>     | <b>#1.1</b> | 22.05 | 22.37 | 20.06 | 22.28 |
|                               |               | <b>#1.2</b> | 21.73 | 22.15 | 19.24 | 22.13 |
|                               |               | <b>#1.3</b> | 21.55 | 22.01 | 19.56 | 21.96 |
|                               | <b>#1 NRT</b> |             | 0     | 0     | 0     | 41.42 |
|                               | <b>#2</b>     | <b>#2.1</b> | 21.67 | 22.06 | 19.14 | 22.18 |
|                               |               | <b>#2.2</b> | 21.46 | 21.82 | 19.09 | 22.02 |
|                               |               | <b>#2.3</b> | 21.33 | 21.71 | 19.01 | 21.9  |
|                               | <b>#2 NRT</b> |             | 0     | 0     | 0     | 0     |
|                               | <b>mean</b>   |             | 21.63 | 22.02 | 19.35 | 22.08 |
|                               | <b>SD</b>     |             | 0.17  | 0.15  | 0.20  | 0.12  |
| <b>mCh_mRNA<sup>2CP</sup></b> | <b>#1</b>     | <b>#1.1</b> | 22.15 | 22.04 | 20.01 | 22.15 |
|                               |               | <b>#1.2</b> | 22.14 | 22.08 | 19.09 | 22.17 |
|                               |               | <b>#1.3</b> | 22.14 | 22.12 | 19.99 | 22.16 |
|                               | <b>#1 NRT</b> |             | 0     | 0     | 0     | 0     |
|                               | <b>#2</b>     | <b>#2.1</b> | 22.2  | 22.15 | 19.55 | 22.29 |
|                               |               | <b>#2.2</b> | 22.05 | 22.03 | 18.92 | 22.17 |
|                               |               | <b>#2.3</b> | 21.76 | 21.83 | 19.15 | 22.02 |
|                               | <b>#2 NRT</b> |             | 0     | 0     | 0     | 0     |
|                               | <b>mean</b>   |             | 22.07 | 22.04 | 19.45 | 22.16 |
|                               | <b>SD</b>     |             | 0.09  | 0.08  | 0.34  | 0.06  |
| <b>mCh_mRNA<sup>1PM</sup></b> | <b>#1</b>     | <b>#1.1</b> | 21.34 | 21.77 | 19.85 | 22.19 |
|                               |               | <b>#1.2</b> | 21.06 | 21.43 | 18.91 | 21.77 |
|                               |               | <b>#1.3</b> | 21.04 | 21.57 | 18.82 | 22.01 |
|                               | <b>#1 NRT</b> |             | 0     | 0     | 0     | 0     |
|                               | <b>#2</b>     | <b>#2.1</b> | 21.28 | 21.99 | 19.91 | 22.28 |
|                               |               | <b>#2.2</b> | 21.23 | 21.93 | 19.87 | 22.24 |
|                               |               | <b>#2.3</b> | 21.2  | 21.99 | 19.74 | 22.25 |
|                               | <b>#2 NRT</b> |             | 0     | 0     | 0     | 0     |
|                               | <b>mean</b>   |             | 21.19 | 21.78 | 19.52 | 22.12 |
|                               | <b>SD</b>     |             | 0.08  | 0.08  | 0.27  | 0.09  |
| <b>mCh_mRNA<sup>2PM</sup></b> | <b>#1</b>     | <b>#1.1</b> | 21.13 | 21.46 | 19.53 | 22.09 |
|                               |               | <b>#1.2</b> | 20.77 | 21.32 | 19.44 | 21.74 |
|                               |               | <b>#1.3</b> | 21.25 | 21.69 | 20.28 | 22.2  |

|                                              |               |             |       |       |       |       |
|----------------------------------------------|---------------|-------------|-------|-------|-------|-------|
|                                              | <b>#1 NRT</b> |             | 0     | 0     | 0     | 0     |
|                                              | <b>#2</b>     | <b>#2.1</b> | 21.09 | 21.56 | 19.6  | 22.11 |
|                                              |               | <b>#2.2</b> | 20.96 | 21.34 | 19.47 | 22.13 |
|                                              |               | <b>#2.3</b> | 20.83 | 21.27 | 19.8  | 22.01 |
|                                              | <b>#2 NRT</b> |             | 0     | 0     | 0     | 0     |
|                                              | <b>mean</b>   |             | 21.01 | 21.44 | 19.69 | 22.05 |
|                                              | <b>SD</b>     |             | 0.16  | 0.14  | 0.26  | 0.12  |
| <b>mCh_mRNA<sub>UTR2</sub><sup>WT</sup></b>  | <b>#1</b>     | <b>#1.1</b> | 20.64 | 21.15 | 19.06 | 21.76 |
|                                              |               | <b>#1.2</b> | 20.54 | 21.07 | 18.68 | 21.7  |
|                                              |               | <b>#1.3</b> | 20.86 | 21.34 | 19.31 | 22.1  |
|                                              | <b>#1 NRT</b> |             | 0     | 0     | 0     | 0     |
|                                              | <b>#2</b>     | <b>#2.1</b> | 20.41 | 20.92 | 18.56 | 21.45 |
|                                              |               | <b>#2.2</b> | 21.3  | 21.87 | 20.01 | 22.37 |
|                                              |               | <b>#2.3</b> | 20.71 | 21.23 | 19.32 | 21.78 |
|                                              | <b>#2 NRT</b> |             | 0     | 0     | 0     | 0     |
|                                              | <b>mean</b>   |             | 20.74 | 21.26 | 19.16 | 21.86 |
|                                              | <b>SD</b>     |             | 0.25  | 0.25  | 0.43  | 0.28  |
| <b>mCh_mRNA<sub>UTR2</sub><sup>1CP</sup></b> | <b>#1</b>     | <b>#1.1</b> | 22.03 | 22.04 | 19.34 | 22.28 |
|                                              |               | <b>#1.2</b> | 21.58 | 21.63 | 19.04 | 22    |
|                                              |               | <b>#1.3</b> | 21.6  | 21.63 | 18.78 | 21.97 |
|                                              | <b>#1 NRT</b> |             | 0     | 0     | 0     | 0     |
|                                              | <b>#2</b>     | <b>#2.1</b> | 21.69 | 21.8  | 18.83 | 22.12 |
|                                              |               | <b>#2.2</b> | 21.47 | 21.55 | 19.1  | 21.92 |
|                                              |               | <b>#2.3</b> | 21.29 | 21.38 | 18.86 | 21.72 |
|                                              | <b>#2 NRT</b> |             | 0     | 0     | 0     | 0     |
|                                              | <b>mean</b>   |             | 21.61 | 21.67 | 18.99 | 22.00 |
|                                              | <b>SD</b>     |             | 0.19  | 0.18  | 0.17  | 0.15  |
| <b>mCh_mRNA<sub>UTR2</sub><sup>2CP</sup></b> | <b>#1</b>     | <b>#1.1</b> | 22.3  | 22.11 | 19.96 | 22.29 |
|                                              |               | <b>#1.2</b> | 22.18 | 21.99 | 19.27 | 22.15 |
|                                              |               | <b>#1.3</b> | 21.64 | 21.52 | 19.25 | 21.59 |
|                                              | <b>#1 NRT</b> |             | 0     | 0     | 0     | 0     |
|                                              | <b>#2</b>     | <b>#2.1</b> | 21.88 | 21.56 | 18.99 | 21.89 |
|                                              |               | <b>#2.2</b> | 22.03 | 21.76 | 18.86 | 22.04 |
|                                              |               | <b>#2.3</b> | 22.14 | 21.99 | 19.6  | 22.21 |
|                                              | <b>#2 NRT</b> |             | 0     | 0     | 0     | 0     |
|                                              | <b>mean</b>   |             | 22.03 | 21.82 | 19.32 | 22.03 |
|                                              | <b>SD</b>     |             | 0.20  | 0.22  | 0.33  | 0.22  |
| <b>mCh_mRNA<sub>UTR2</sub><sup>1PM</sup></b> | <b>#1</b>     | <b>#1.1</b> | 21    | 21.34 | 19.6  | 22.11 |
|                                              |               | <b>#1.2</b> | 20.95 | 21.36 | 18.57 | 21.98 |
|                                              |               | <b>#1.3</b> | 20.99 | 21.41 | 19.21 | 22.02 |
|                                              | <b>#1 NRT</b> |             | 0     | 0     | 0     | 39.63 |
|                                              | <b>#2</b>     | <b>#2.1</b> | 21.09 | 21.53 | 19.3  | 22.18 |

|                                          |               |             |       |       |       |       |
|------------------------------------------|---------------|-------------|-------|-------|-------|-------|
|                                          |               | <b>#2.2</b> | 21    | 21.43 | 19.17 | 22.1  |
|                                          |               | <b>#2.3</b> | 21.06 | 21.57 | 19.34 | 22.18 |
|                                          | <b>#2 NRT</b> |             | 0     | 0     | 0     | 0     |
|                                          | <b>mean</b>   |             | 21.02 | 21.44 | 19.20 | 22.10 |
|                                          | <b>SD</b>     |             | 0.03  | 0.04  | 0.25  | 0.05  |
| mCh_mRNA <sub>UTR2</sub> <sup>2 PM</sup> | <b>#1</b>     | <b>#1.1</b> | 21.01 | 21.25 | 19.33 | 22.05 |
|                                          |               | <b>#1.2</b> | 20.77 | 21.05 | 19.16 | 21.85 |
|                                          |               | <b>#1.3</b> | 21.03 | 21.31 | 19.1  | 21.95 |
|                                          | <b>#1 NRT</b> |             | 0     | 0     | 0     | 0     |
|                                          | <b>#2</b>     | <b>#2.1</b> | 21.08 | 21.39 | 19.14 | 22.04 |
|                                          |               | <b>#2.2</b> | 21.15 | 21.52 | 19.29 | 22.12 |
|                                          |               | <b>#2.3</b> | 21.13 | 21.5  | 19.3  | 22.11 |
|                                          | <b>#2 NRT</b> |             | 0     | 0     | 0     | 0     |
| H <sub>2</sub> O Ctrl.                   | <b>#1</b>     | <b>#1.1</b> | 0     | 0     | 21.35 | 22.69 |
|                                          |               | <b>#1.2</b> | 0     | 0     | 19.81 | 22.31 |
|                                          | <b>#1 NRT</b> |             | 0     | 0     | 0     | 0     |
|                                          | <b>#2</b>     | <b>#2.1</b> | 0     | 0     | 19.68 | 22.47 |
|                                          |               | <b>#2.2</b> | 0     | 0     | 19.51 | 22.52 |
|                                          | <b>#2 NRT</b> |             | 0     | 0     | 0     | 0     |
|                                          | <b>mean</b>   |             | 0.00  | 0.00  | 20.09 | 22.50 |
|                                          | <b>SD</b>     |             | 0.00  | 0.00  | 0.43  | 0.11  |
| Untreated Cells                          | <b>#1</b>     | <b>#1.1</b> | 0     | 0     | 20.11 | 22.89 |
|                                          |               | <b>#1.2</b> | 0     | 0     | 19.33 | 22.34 |
|                                          |               | <b>#1.3</b> | 0     | 0     | 19.33 | 22.35 |
|                                          | <b>#1 NRT</b> |             | 0     | 0     | 0     | 0     |
|                                          | <b>#2</b>     | <b>#2.1</b> | 0     | 0     | 19.5  | 22.43 |
|                                          |               | <b>#2.2</b> | 0     | 0     | 19.57 | 22.51 |
|                                          |               | <b>#2.3</b> | 0     | 0     | 19.09 | 22.41 |
|                                          | <b>#2 NRT</b> |             | 0     | 0     | 0     | 0     |
| NTC                                      | <b>#1</b>     |             | 0     | 0     | 0     | 0     |
|                                          | <b>#2</b>     |             | 0     | 0     | 0     | 0     |

$$\Delta C_t = C_t(\text{mCh}) - C_t(\text{GAPDH})$$

|                          | $\Delta C_t$<br>(mCh 3'end) | error | $\Delta C_t$<br>(mCh internal) | error |
|--------------------------|-----------------------------|-------|--------------------------------|-------|
| mCh_mRNA <sup>WT</sup>   | -0.75                       | 0.19  | -0.19                          | 0.18  |
| mCh_mRNA <sup>1 CP</sup> | -0.45                       | 0.21  | -0.06                          | 0.19  |
| mCh_mRNA <sup>2 CP</sup> | -0.09                       | 0.11  | -0.12                          | 0.10  |
| mCh_mRNA <sup>1 PM</sup> | -0.93                       | 0.13  | -0.34                          | 0.13  |

|                                          |        |      |        |      |
|------------------------------------------|--------|------|--------|------|
| mCh_mRNA <sup>2 PM</sup>                 | -1.04  | 0.20 | -0.61  | 0.19 |
| mCh_mRNA <sub>UTR2</sub> <sup>WT</sup>   | -1.12  | 0.38 | -0.60  | 0.38 |
| mCh_mRNA <sub>UTR2</sub> <sup>1 CP</sup> | -0.39  | 0.24 | -0.33  | 0.24 |
| mCh_mRNA <sub>UTR2</sub> <sup>2 CP</sup> | 0.00   | 0.29 | -0.21  | 0.31 |
| mCh_mRNA <sub>UTR2</sub> <sup>1 PM</sup> | -1.08  | 0.05 | -0.65  | 0.06 |
| mCh_mRNA <sub>UTR2</sub> <sup>2 PM</sup> | -0.99  | 0.09 | -0.68  | 0.10 |
| H <sub>2</sub> O Ctrl.                   | -22.50 | 0.11 | -22.50 | 0.11 |
| Untreated cells                          | -22.49 | 0.15 | -22.49 | 0.15 |

### mCh\_mRNA + mCh\_mRNA<sub>UTR2</sub> data set 2, cell lysis 6 h post transfection

#### C<sub>t</sub> values

|                          | Duplicate Samples | Technical Triplicats | Ct values       |                   |              |            |
|--------------------------|-------------------|----------------------|-----------------|-------------------|--------------|------------|
|                          |                   |                      | mCh 3' end: FAM | mCh internal: HEX | β-Actin: ROX | GAPDH: Cy5 |
| mCh_mRNA <sup>WT</sup>   | #1                | #1.1                 | 16.38           | 16.55             | 18.7         | 21.31      |
|                          |                   | #1.2                 | 16.19           | 16.37             | 20.86        | 21.2       |
|                          |                   | #1.3                 | 16.22           | 16.43             | 18.24        | 21.21      |
|                          | #1 NRT            |                      | 0               | 0                 | 0            | 0          |
|                          | #2                | #2.1                 | 16.19           | 16.44             | 18.62        | 21.12      |
|                          |                   | #2.2                 | 16.2            | 16.46             | 18.12        | 21.2       |
|                          |                   | #2.3                 | 16.25           | 16.5              | 18.15        | 21.24      |
|                          | #2 NRT            |                      | 0               | 0                 | 0            | 0          |
|                          | mean              |                      | 16.24           | 16.46             | 18.78        | 21.21      |
|                          | SD                |                      | 0.05            | 0.05              | 0.69         | 0.05       |
| mCh_mRNA <sup>1 CP</sup> | #1                | #1.1                 | 16.97           | 17.01             | 18.35        | 21.25      |
|                          |                   | #1.2                 | 16.96           | 16.83             | 18.48        | 21.27      |
|                          |                   | #1.3                 | 16.71           | 16.82             | 18.7         | 21.25      |
|                          | #1 NRT            |                      | 0               | 0                 | 0            | 0          |
|                          | #2                | #2.1                 | 16.72           | 16.87             | 18.17        | 21.23      |
|                          |                   | #2.2                 | 16.78           | 16.98             | 18.23        | 21.3       |
|                          |                   | #2.3                 | 16.68           | 16.87             | 17.64        | 21.22      |
|                          | #2 NRT            |                      | 0               | 0                 | 0            | 0          |
|                          | mean              |                      | 16.80           | 16.90             | 18.26        | 21.25      |
|                          | SD                |                      | 0.08            | 0.07              | 0.20         | 0.02       |
| mCh_mRNA <sup>2 CP</sup> | #1                | #1.1                 | 17.29           | 16.84             | 18.33        | 21.23      |
|                          |                   | #1.2                 | 17.28           | 16.83             | 18.1         | 21.24      |
|                          |                   | #1.3                 | 17.29           | 16.88             | 18.52        | 21.26      |
|                          | #1 NRT            |                      | 0               | 0                 | 0            | 0          |
|                          | #2                | #2.1                 | 17.28           | 17.09             | 18.38        | 21.14      |
|                          |                   | #2.2                 | 17.25           | 17.07             | 18.36        | 21.15      |

|                                              |               |             |       |       |       |       |
|----------------------------------------------|---------------|-------------|-------|-------|-------|-------|
|                                              |               | <b>#2.3</b> | 17.27 | 17.1  | 18.09 | 21.18 |
|                                              | <b>#2 NRT</b> |             | 0     | 36.48 | 0     | 0     |
|                                              | <b>mean</b>   |             | 17.28 | 16.97 | 18.30 | 21.20 |
|                                              | <b>SD</b>     |             | 0.01  | 0.02  | 0.15  | 0.01  |
| <b>mCh_mRNA<sup>1PM</sup></b>                | <b>#1</b>     | <b>#1.1</b> | 16.45 | 16.62 | 18.76 | 21.46 |
|                                              |               | <b>#1.2</b> | 16.42 | 16.64 | 21.39 | 21.46 |
|                                              |               | <b>#1.3</b> | 16.41 | 16.61 | 18.14 | 21.28 |
|                                              | <b>#1 NRT</b> |             | 0     | 0     | 0     | 0     |
|                                              | <b>#2</b>     | <b>#2.1</b> | 16.45 | 16.7  | 18.2  | 21.2  |
|                                              |               | <b>#2.2</b> | 16.53 | 16.75 | 18.18 | 21.34 |
|                                              |               | <b>#2.3</b> | 16.57 | 16.82 | 18.48 | 21.35 |
|                                              | <b>#2 NRT</b> |             | 0     | 0     | 0     | 0     |
|                                              | <b>mean</b>   |             | 16.47 | 16.69 | 18.86 | 21.35 |
|                                              | <b>SD</b>     |             | 0.03  | 0.03  | 0.77  | 0.08  |
| <b>mCh_mRNA<sup>2PM</sup></b>                | <b>#1</b>     | <b>#1.1</b> | 16.39 | 16.57 | 18.48 | 21.29 |
|                                              |               | <b>#1.2</b> | 16.34 | 16.54 | 18.58 | 21.27 |
|                                              |               | <b>#1.3</b> | 16.35 | 16.56 | 20.92 | 21.43 |
|                                              | <b>#1 NRT</b> |             | 0     | 0     | 0     | 0     |
|                                              | <b>#2</b>     | <b>#2.1</b> | 16.31 | 16.46 | 18.5  | 21.32 |
|                                              |               | <b>#2.2</b> | 16.32 | 16.52 | 21.36 | 21.19 |
|                                              |               | <b>#2.3</b> | 16.32 | 16.54 | 20.84 | 21.22 |
|                                              | <b>#2 NRT</b> |             | 0     | 39.9  | 0     | 0     |
|                                              | <b>mean</b>   |             | 16.34 | 16.53 | 19.78 | 21.29 |
|                                              | <b>SD</b>     |             | 0.01  | 0.02  | 1.19  | 0.06  |
| <b>mCh_mRNA<sub>UTR2</sub><sup>WT</sup></b>  | <b>#1</b>     | <b>#1.1</b> | 16.23 | 16.51 | 20.82 | 21.25 |
|                                              |               | <b>#1.2</b> | 16.13 | 16.38 | 20.75 | 21.16 |
|                                              |               | <b>#1.3</b> | 16.15 | 16.39 | 20.8  | 21.21 |
|                                              | <b>#1 NRT</b> |             | 0     | 0     | 0     | 0     |
|                                              | <b>#2</b>     | <b>#2.1</b> | 16.14 | 16.39 | 18.31 | 21.08 |
|                                              |               | <b>#2.2</b> | 16.17 | 16.37 | 18.42 | 21.21 |
|                                              |               | <b>#2.3</b> | 16.11 | 16.38 | 17.83 | 21.12 |
|                                              | <b>#2 NRT</b> |             | 0     | 0     | 0     | 0     |
|                                              | <b>mean</b>   |             | 16.16 | 16.40 | 19.49 | 21.17 |
|                                              | <b>SD</b>     |             | 0.03  | 0.03  | 0.14  | 0.05  |
| <b>mCh_mRNA<sub>UTR2</sub><sup>1CP</sup></b> | <b>#1</b>     | <b>#1.1</b> | 17.21 | 16.82 | 18.45 | 21.3  |
|                                              |               | <b>#1.2</b> | 17.12 | 16.71 | 18.01 | 21.22 |
|                                              |               | <b>#1.3</b> | 17.09 | 16.65 | 17.52 | 21.19 |
|                                              | <b>#1 NRT</b> |             | 0     | 37.21 | 33.7  | 36.41 |
|                                              | <b>#2</b>     | <b>#2.1</b> | 17.02 | 16.59 | 17.92 | 21.12 |
|                                              |               | <b>#2.2</b> | 17.02 | 16.59 | 17.73 | 21.14 |



|                                               |               |             |       |       |       |       |
|-----------------------------------------------|---------------|-------------|-------|-------|-------|-------|
|                                               |               | <b>#2.3</b> | 17.03 | 16.63 | 18.22 | 21.13 |
|                                               | <b>#2 NRT</b> |             | 0     | 41.37 | 0     | 0     |
|                                               | <b>mean</b>   |             | 17.08 | 16.67 | 17.98 | 21.18 |
|                                               | <b>SD</b>     |             | 0.03  | 0.04  | 0.29  | 0.03  |
| <b>mCh_mRNA<sub>UTR2</sub><sup>2 CP</sup></b> | <b>#1</b>     | <b>#1.1</b> | 17.37 | 16.94 | 18.03 | 21.45 |
|                                               |               | <b>#1.2</b> | 17.28 | 17.03 | 18    | 21.38 |
|                                               |               | <b>#1.3</b> | 17.29 | 17.03 | 18.01 | 21.37 |
|                                               | <b>#1 NRT</b> |             | 0     | 0     | 0     | 0     |
|                                               | <b>#2</b>     | <b>#2.1</b> | 17.38 | 17.12 | 17.7  | 21.22 |
|                                               |               | <b>#2.2</b> | 17.33 | 17.11 | 18.3  | 21.2  |
|                                               |               | <b>#2.3</b> | 17.36 | 17.12 | 18.04 | 21.22 |
|                                               | <b>#2 NRT</b> |             | 0     | 0     | 0     | 0     |
|                                               | <b>mean</b>   |             | 17.34 | 17.06 | 18.01 | 21.31 |
|                                               | <b>SD</b>     |             | 0.03  | 0.02  | 0.13  | 0.02  |
| <b>mCh_mRNA<sub>UTR2</sub><sup>1 PM</sup></b> | <b>#1</b>     | <b>#1.1</b> | 16.42 | 16.64 | 18.51 | 21.28 |
|                                               |               | <b>#1.2</b> | 16.37 | 16.6  | 18.47 | 21.26 |
|                                               |               | <b>#1.3</b> | 16.38 | 16.59 | 20.76 | 21.39 |
|                                               | <b>#1 NRT</b> |             | 0     | 0     | 0     | 0     |
|                                               | <b>#2</b>     | <b>#2.1</b> | 16.4  | 16.62 | 18.27 | 21.49 |
|                                               |               | <b>#2.2</b> | 16.26 | 16.49 | 17.9  | 21.24 |
|                                               |               | <b>#2.3</b> | 16.39 | 16.9  | 18.37 | 21.51 |
|                                               | <b>#2 NRT</b> |             | 0     | 0     | 0     | 0     |
|                                               | <b>mean</b>   |             | 16.37 | 16.64 | 18.71 | 21.36 |
|                                               | <b>SD</b>     |             | 0.04  | 0.10  | 0.64  | 0.09  |
| <b>mCh_mRNA<sub>UTR2</sub><sup>2 PM</sup></b> | <b>#1</b>     | <b>#1.1</b> | 16.52 | 16.68 | 17.98 | 21.5  |
|                                               |               | <b>#1.2</b> | 16.44 | 16.63 | 18.19 | 21.45 |
|                                               |               | <b>#1.3</b> | 16.45 | 16.6  | 18.24 | 21.43 |
|                                               | <b>#1 NRT</b> |             | 0     | 41.06 | 0     | 40.2  |
|                                               | <b>#2</b>     | <b>#2.1</b> | 16.51 | 16.61 | 18.3  | 21.3  |
|                                               |               | <b>#2.2</b> | 16.4  | 16.56 | 18.3  | 21.25 |
|                                               |               | <b>#2.3</b> | 16.34 | 16.79 | 21.31 | 21.4  |
|                                               | <b>#2 NRT</b> |             | 0     | 40.45 | 0     | 0     |
|                                               | <b>mean</b>   |             | 16.44 | 16.65 | 18.72 | 21.39 |
|                                               | <b>SD</b>     |             | 0.05  | 0.07  | 0.77  | 0.05  |
| <b>H<sub>2</sub>O Ctrl.</b>                   | <b>#1</b>     | <b>#1.1</b> | 0     | 39.85 | 18.85 | 21.51 |
|                                               |               | <b>#1.2</b> | 0     | 40.34 | 17.97 | 21.43 |
|                                               | <b>#1 NRT</b> |             | 0     | 0     | 0     | 0     |
|                                               | <b>#2</b>     | <b>#2.1</b> | 0     | 0     | 18.2  | 21.31 |
|                                               |               | <b>#2.2</b> | 0     | 0     | 18.94 | 21.31 |
|                                               | <b>#2 NRT</b> |             | 0     | 0     | 0     | 0     |
|                                               | <b>mean</b>   |             | 0.00  | 20.05 | 18.49 | 21.39 |
|                                               | <b>SD</b>     |             | 0.00  | 0.12  | 0.41  | 0.02  |
| <b>Untreated Cells</b>                        | <b>#1</b>     | <b>#1.1</b> | 34.49 | 37.09 | 18.33 | 21.41 |
|                                               |               | <b>#1.2</b> | 33.39 | 36.73 | 17.94 | 21.34 |

|            |               |             |       |       |       |       |
|------------|---------------|-------------|-------|-------|-------|-------|
|            |               | <b>#1.3</b> | 34.61 | 37.27 | 17.95 | 21.37 |
|            | <b>#1 NRT</b> |             | 0     | 0     | 0     | 0     |
|            | <b>#2</b>     | <b>#2.1</b> | 0     | 0     | 18.13 | 21.3  |
|            |               | <b>#2.2</b> | 0     | 0     | 18.38 | 21.29 |
|            |               | <b>#2.3</b> | 0     | 0     | 18.13 | 21.33 |
|            | <b>#2 NRT</b> |             | 0     | 0     | 0     | 0     |
|            | <b>mean</b>   |             | 17.08 | 18.52 | 18.14 | 21.34 |
|            | <b>SD</b>     |             | 0.27  | 0.11  | 0.15  | 0.02  |
| <b>NTC</b> | <b>#1</b>     |             | 0     | 0     | 0     | 0     |
|            | <b>#2</b>     |             | 0     | 0     | 0     | 0     |

$$\Delta C_t = C_t(\text{mCh}) - C_t(\text{GAPDH})$$

|                                          | $\Delta C_t$<br>(mCh 3'end) | error | $\Delta C_t$<br>(mCh internal) | error |
|------------------------------------------|-----------------------------|-------|--------------------------------|-------|
| mCh_mRNA <sup>WT</sup>                   | -4.98                       | 0.07  | -4.76                          | 0.07  |
| mCh_mRNA <sup>1 CP</sup>                 | -4.45                       | 0.08  | -4.36                          | 0.07  |
| mCh_mRNA <sup>2 CP</sup>                 | -3.92                       | 0.02  | -4.23                          | 0.02  |
| mCh_mRNA <sup>1 PM</sup>                 | -4.88                       | 0.08  | -4.66                          | 0.08  |
| mCh_mRNA <sup>2 PM</sup>                 | -4.95                       | 0.06  | -4.76                          | 0.07  |
| mCh_mRNA <sub>UTR2</sub> <sup>WT</sup>   | -5.02                       | 0.06  | -4.77                          | 0.06  |
| mCh_mRNA <sub>UTR2</sub> <sup>1 CP</sup> | -4.10                       | 0.04  | -4.52                          | 0.05  |
| mCh_mRNA <sub>UTR2</sub> <sup>2 CP</sup> | -3.97                       | 0.04  | -4.25                          | 0.03  |
| mCh_mRNA <sub>UTR2</sub> <sup>1 PM</sup> | -4.99                       | 0.10  | -4.72                          | 0.13  |
| mCh_mRNA <sub>UTR2</sub> <sup>2 PM</sup> | -4.95                       | 0.07  | -4.74                          | 0.08  |
| H <sub>2</sub> O Ctrl.                   | -21.39                      | 0.02  | -1.34                          | 0.12  |
| Untreated cells                          | -4.26                       | 0.28  | -2.83                          | 0.11  |

### mCh\_mRNA + mCh\_mRNA<sub>UTR2</sub> data set 2, cell lysis 24 h post transfection

#### C<sub>t</sub> values

|                              | Duplicate Samples | Technical Triplicats | Ct values          |                      |                     |            |
|------------------------------|-------------------|----------------------|--------------------|----------------------|---------------------|------------|
|                              |                   |                      | mCh 3' end:<br>FAM | mCh internal:<br>HEX | $\beta$ -Actin: ROX | GAPDH: Cy5 |
| <b>mCh_mRNA<sup>WT</sup></b> | <b>#1</b>         | <b>#1.1</b>          | 19.08              | 19.59                | 19.12               | 22.1       |
|                              |                   | <b>#1.2</b>          | 18.94              | 19.44                | 18.73               | 22.03      |
|                              |                   | <b>#1.3</b>          | 19.11              | 19.68                | 19.12               | 22.05      |
|                              | <b>#1 NRT</b>     |                      | 0                  | 0                    | 0                   | 0          |
|                              | <b>#2</b>         | <b>#2.1</b>          | 18.78              | 19.41                | 18.29               | 21.93      |
|                              |                   | <b>#2.2</b>          | 18.94              | 19.43                | 17.71               | 21.96      |
|                              |                   | <b>#2.3</b>          | 18.73              | 19.38                | 18.34               | 21.94      |
|                              | <b>#2 NRT</b>     |                      | 0                  | 0                    | 0                   | 0          |
|                              | <b>mean</b>       |                      | 18.93              | 19.49                | 18.55               | 22.00      |

|                               |               |             |       |       |       |       |
|-------------------------------|---------------|-------------|-------|-------|-------|-------|
|                               | <b>SD</b>     |             | 0.08  | 0.06  | 0.23  | 0.02  |
| <b>mCh_mRNA<sup>1CP</sup></b> | <b>#1</b>     | <b>#1.1</b> | 18.95 | 19.14 | 18.97 | 21.69 |
|                               |               | <b>#1.2</b> | 19.16 | 19.37 | 18.32 | 21.97 |
|                               |               | <b>#1.3</b> | 19.28 | 19.53 | 17.73 | 22.11 |
|                               | <b>#1 NRT</b> |             | 0     | 0     | 0     | 0     |
|                               | <b>#2</b>     | <b>#2.1</b> | 19.47 | 19.49 | 18.39 | 22.07 |
|                               |               | <b>#2.2</b> | 19.44 | 19.46 | 17.66 | 22.08 |
|                               |               | <b>#2.3</b> | 19.4  | 19.5  | 17.84 | 22.04 |
|                               | <b>#2 NRT</b> |             | 0     | 0     | 0     | 0     |
|                               | <b>mean</b>   |             | 19.28 | 19.42 | 18.15 | 21.99 |
|                               | <b>SD</b>     |             | 0.08  | 0.09  | 0.41  | 0.10  |
| <b>mCh_mRNA<sup>2CP</sup></b> | <b>#1</b>     | <b>#1.1</b> | 19.4  | 19.25 | 17.59 | 21.87 |
|                               |               | <b>#1.2</b> | 19.46 | 19.39 | 17.04 | 22.01 |
|                               |               | <b>#1.3</b> | 19.48 | 19.42 | 17.48 | 22.03 |
|                               | <b>#1 NRT</b> |             | 0     | 0     | 0     | 0     |
|                               | <b>#2</b>     | <b>#2.1</b> | 19.46 | 19.43 | 17.8  | 21.92 |
|                               |               | <b>#2.2</b> | 19.49 | 19.4  | 17.66 | 22.01 |
|                               |               | <b>#2.3</b> | 19.52 | 19.48 | 18.56 | 22.04 |
|                               | <b>#2 NRT</b> |             | 0     | 0     | 0     | 0     |
|                               | <b>mean</b>   |             | 19.47 | 19.40 | 17.69 | 21.98 |
|                               | <b>SD</b>     |             | 0.03  | 0.05  | 0.32  | 0.06  |
| <b>mCh_mRNA<sup>1PM</sup></b> | <b>#1</b>     | <b>#1.1</b> | 18.75 | 19.26 | 18.23 | 22.06 |
|                               |               | <b>#1.2</b> | 18.62 | 19.13 | 17.62 | 21.97 |
|                               |               | <b>#1.3</b> | 18.65 | 19.13 | 16.72 | 22    |
|                               | <b>#1 NRT</b> |             | 0     | 0     | 0     | 0     |
|                               | <b>#2</b>     | <b>#2.1</b> | 18.72 | 19.21 | 18.07 | 22.02 |
|                               |               | <b>#2.2</b> | 18.74 | 19.26 | 18.18 | 22.05 |
|                               |               | <b>#2.3</b> | 18.79 | 19.33 | 18.15 | 22.12 |
|                               | <b>#2 NRT</b> |             | 0     | 0     | 0     | 0     |
|                               | <b>mean</b>   |             | 18.71 | 19.22 | 17.83 | 22.04 |
|                               | <b>SD</b>     |             | 0.04  | 0.06  | 0.33  | 0.04  |
| <b>mCh_mRNA<sup>2PM</sup></b> | <b>#1</b>     | <b>#1.1</b> | 18.53 | 19.18 | 18.07 | 21.91 |
|                               |               | <b>#1.2</b> | 18.5  | 19.09 | 18.45 | 21.9  |
|                               |               | <b>#1.3</b> | 18.63 | 19.24 | 18.78 | 22.02 |
|                               | <b>#1 NRT</b> |             | 0     | 0     | 0     | 0     |
|                               | <b>#2</b>     | <b>#2.1</b> | 18.48 | 18.96 | 18.93 | 22.02 |
|                               |               | <b>#2.2</b> | 18.56 | 19.06 | 18.39 | 22.12 |
|                               |               | <b>#2.3</b> | 18.6  | 19.15 | 18.55 | 22.17 |
|                               | <b>#2 NRT</b> |             | 0     | 0     | 0     | 0     |
|                               | <b>mean</b>   |             | 18.55 | 19.11 | 18.53 | 22.02 |
|                               | <b>SD</b>     |             | 0.05  | 0.07  | 0.26  | 0.06  |

|                                          |        |      |       |       |       |       |
|------------------------------------------|--------|------|-------|-------|-------|-------|
| mCh_mRNA <sub>UTR2</sub> <sup>WT</sup>   | #1     | #1.1 | 18.77 | 19.31 | 17.9  | 22.1  |
|                                          |        | #1.2 | 18.62 | 19.22 | 17.37 | 22    |
|                                          |        | #1.3 | 18.66 | 19.27 | 18.01 | 22.04 |
|                                          | #1 NRT |      | 0     | 0     | 0     | 0     |
|                                          | #2     | #2.1 | 18.64 | 19.23 | 18.04 | 21.98 |
|                                          |        | #2.2 | 18.52 | 19.13 | 17.44 | 21.92 |
|                                          |        | #2.3 | 18.58 | 19.2  | 17.95 | 22.01 |
|                                          | #2 NRT |      | 0     | 0     | 0     | 0     |
|                                          | mean   |      | 18.63 | 19.23 | 17.79 | 22.01 |
|                                          | SD     |      | 0.06  | 0.04  | 0.27  | 0.04  |
| mCh_mRNA <sub>UTR2</sub> <sup>1 CP</sup> | #1     | #1.1 | 19.62 | 19.66 | 18.31 | 22.11 |
|                                          |        | #1.2 | 19.45 | 19.66 | 18.23 | 22    |
|                                          |        | #1.3 | 19.54 | 19.73 | 18.44 | 22.1  |
|                                          | #1 NRT |      | 0     | 0     | 0     | 0     |
|                                          | #2     | #2.1 | 19.15 | 19.31 | 18.48 | 21.94 |
|                                          |        | #2.2 | 19.19 | 19.37 | 18.01 | 22.01 |
|                                          |        | #2.3 | 19.19 | 19.56 | 17.96 | 22.07 |
|                                          | #2 NRT |      | 0     | 0     | 0     | 0     |
|                                          | mean   |      | 19.36 | 19.55 | 18.24 | 22.04 |
|                                          | SD     |      | 0.04  | 0.07  | 0.16  | 0.05  |
| mCh_mRNA <sub>UTR2</sub> <sup>2 CP</sup> | #1     | #1.1 | 19.51 | 19.3  | 17.56 | 22.09 |
|                                          |        | #1.2 | 19.47 | 19.23 | 17.41 | 22.04 |
|                                          |        | #1.3 | 19.46 | 19.25 | 16.82 | 22.06 |
|                                          | #1 NRT |      | 0     | 0     | 0     | 0     |
|                                          | #2     | #2.1 | 19.43 | 19.22 | 18.38 | 21.92 |
|                                          |        | #2.2 | 19.56 | 19.35 | 17.49 | 22.06 |
|                                          |        | #2.3 | 19.61 | 19.38 | 18.56 | 22.12 |
|                                          | #2 NRT |      | 0     | 0     | 0     | 0     |
|                                          | mean   |      | 19.51 | 19.29 | 17.70 | 22.05 |
|                                          | SD     |      | 0.05  | 0.05  | 0.39  | 0.05  |
| mCh_mRNA <sub>UTR2</sub> <sup>1 PM</sup> | #1     | #1.1 | 18.72 | 19.26 | 17.77 | 22.1  |
|                                          |        | #1.2 | 18.71 | 19.24 | 17.42 | 22.1  |
|                                          |        | #1.3 | 18.74 | 19.33 | 17.35 | 22.14 |
|                                          | #1 NRT |      | 0     | 0     | 0     | 0     |
|                                          | #2     | #2.1 | 18.87 | 19.45 | 18.52 | 22.13 |
|                                          |        | #2.2 | 18.86 | 19.43 | 18.3  | 22.19 |
|                                          |        | #2.3 | 19    | 19.45 | 17.23 | 22.18 |
|                                          | #2 NRT |      | 0     | 0     | 0     | 0     |
|                                          | mean   |      | 18.82 | 19.36 | 17.77 | 22.14 |
|                                          | SD     |      | 0.04  | 0.02  | 0.37  | 0.02  |
| mCh_mRNA <sub>UTR2</sub> <sup>2 PM</sup> | #1     | #1.1 | 18.86 | 19.3  | 17.59 | 22.12 |
|                                          |        | #1.2 | 19.01 | 19.3  | 18.53 | 22.1  |

|                             |               |             |       |       |       |       |
|-----------------------------|---------------|-------------|-------|-------|-------|-------|
|                             |               | <b>#1.3</b> | 18.94 | 19.22 | 17.98 | 22.07 |
|                             | <b>#1 NRT</b> |             | 0     | 0     | 0     | 0     |
|                             | <b>#2</b>     | <b>#2.1</b> | 18.94 | 19.19 | 17.46 | 22.03 |
|                             |               | <b>#2.2</b> | 18.95 | 19.22 | 17.42 | 22.07 |
|                             |               | <b>#2.3</b> | 18.91 | 19.23 | 17.34 | 22.04 |
|                             | <b>#2 NRT</b> |             | 0     | 0     | 0     | 0     |
|                             | <b>mean</b>   |             | 18.94 | 19.24 | 17.72 | 22.07 |
|                             | <b>SD</b>     |             | 0.04  | 0.03  | 0.22  | 0.02  |
| <b>H<sub>2</sub>O Ctrl.</b> | <b>#1</b>     | <b>#1.1</b> | 0     | 0     | 20.2  | 22.16 |
|                             |               | <b>#1.2</b> | 0     | 0     | 17.74 | 22.08 |
|                             | <b>#1 NRT</b> |             | 0     | 0     | 0     | 0     |
|                             | <b>#2</b>     | <b>#2.1</b> | 0     | 0     | 17.59 | 22.05 |
|                             |               | <b>#2.2</b> | 0     | 0     | 18.94 | 21.98 |
|                             | <b>#2 NRT</b> |             | 0     | 0     | 0     | 0     |
|                             | <b>mean</b>   |             | 0.00  | 0.00  | 18.62 | 22.07 |
|                             | <b>SD</b>     |             | 0.00  | 0.00  | 0.95  | 0.04  |
| <b>Untreated Cells</b>      | <b>#1</b>     | <b>#1.1</b> | 0     | 0     | 18.09 | 22.03 |
|                             |               | <b>#1.2</b> | 0     | 0     | 17.78 | 21.9  |
|                             |               | <b>#1.3</b> | 0     | 0     | 17.24 | 21.9  |
|                             | <b>#1 NRT</b> |             | 0     | 0     | 0     | 0     |
|                             | <b>#2</b>     | <b>#2.1</b> | 33.54 | 35.47 | 17.34 | 21.92 |
|                             |               | <b>#2.2</b> | 32.37 | 35.14 | 17.49 | 21.94 |
|                             |               | <b>#2.3</b> | 32.82 | 35.54 | 17.87 | 21.89 |
|                             | <b>#2 NRT</b> |             | 32.31 | 34.14 | 0     | 33.18 |
|                             | <b>mean</b>   |             | 16.46 | 17.69 | 17.64 | 21.93 |
|                             | <b>SD</b>     |             | 0.24  | 0.09  | 0.29  | 0.04  |
| <b>NTC</b>                  | <b>#1</b>     |             | 0     | 0     | 0     | 0     |
|                             | <b>#2</b>     |             | 0     | 0     | 0     | 0     |

$$\Delta C_t = C_t(\text{mCh}) - C_t(\text{GAPDH})$$

|                                         | $\Delta C_t$<br>(mCh 3'end) | error | $\Delta C_t$<br>(mCh internal) | error |
|-----------------------------------------|-----------------------------|-------|--------------------------------|-------|
| mCh_mRNA <sup>WT</sup>                  | -3.07                       | 0.08  | -2.51                          | 0.06  |
| mCh_mRNA <sup>1CP</sup>                 | -2.71                       | 0.13  | -2.58                          | 0.13  |
| mCh_mRNA <sup>2CP</sup>                 | -2.51                       | 0.07  | -2.58                          | 0.08  |
| mCh_mRNA <sup>1PM</sup>                 | -3.33                       | 0.06  | -2.82                          | 0.07  |
| mCh_mRNA <sup>2PM</sup>                 | -3.47                       | 0.08  | -2.91                          | 0.09  |
| mCh_mRNA <sub>UTR2</sub> <sup>WT</sup>  | -3.38                       | 0.07  | -2.78                          | 0.06  |
| mCh_mRNA <sub>UTR2</sub> <sup>1CP</sup> | -2.68                       | 0.07  | -2.49                          | 0.09  |
| mCh_mRNA <sub>UTR2</sub> <sup>2CP</sup> | -2.54                       | 0.07  | -2.76                          | 0.07  |
| mCh_mRNA <sub>UTR2</sub> <sup>1PM</sup> | -3.32                       | 0.04  | -2.78                          | 0.03  |
| mCh_mRNA <sub>UTR2</sub> <sup>2PM</sup> | -3.14                       | 0.04  | -2.83                          | 0.03  |
| H <sub>2</sub> O Ctrl.                  | -22.07                      | 0.04  | -22.07                         | 0.04  |

|                 |       |      |       |      |
|-----------------|-------|------|-------|------|
| Untreated cells | -5.48 | 0.24 | -4.24 | 0.10 |
|-----------------|-------|------|-------|------|

**mCh\_mRNA + mCh\_mRNA<sub>UTR2</sub> data set 2, cell lysis 48 h post transfection**

**C<sub>t</sub> values**

|                               | Duplicate Samples | Technical Triplicats | Ct values       |                   |              |            |
|-------------------------------|-------------------|----------------------|-----------------|-------------------|--------------|------------|
|                               |                   |                      | mCh 3' end: FAM | mCh internal: HEX | β-Actin: ROX | GAPDH: Cy5 |
| <b>mCh_mRNA<sup>WT</sup></b>  | <b>#1</b>         | <b>#1.1</b>          | 21.39           | 22.06             | 19.44        | 22.19      |
|                               |                   | <b>#1.2</b>          | 21.24           | 21.94             | 19.59        | 22.11      |
|                               |                   | <b>#1.3</b>          | 21.16           | 21.93             | 17.91        | 22.07      |
|                               | <b>#1 NRT</b>     |                      | 0               | 0                 | 0            | 0          |
|                               | <b>#2</b>         | <b>#2.1</b>          | 21.24           | 22.01             | 17.33        | 22.1       |
|                               |                   | <b>#2.2</b>          | 21.31           | 22.08             | 17.71        | 22.15      |
|                               |                   | <b>#2.3</b>          | 21.23           | 22.03             | 16.84        | 22.09      |
|                               | <b>#2 NRT</b>     |                      | 0               | 0                 | 0            | 0          |
|                               | <b>mean</b>       |                      | 21.26           | 22.01             | 18.14        | 22.12      |
|                               | <b>SD</b>         |                      | 0.07            | 0.04              | 0.56         | 0.04       |
| <b>mCh_mRNA<sup>1CP</sup></b> | <b>#1</b>         | <b>#1.1</b>          | 21.73           | 22.04             | 17.15        | 22.11      |
|                               |                   | <b>#1.2</b>          | 21.63           | 22.13             | 17.98        | 22.04      |
|                               |                   | <b>#1.3</b>          | 21.65           | 22.19             | 17.53        | 22.15      |
|                               | <b>#1 NRT</b>     |                      | 0               | 0                 | 0            | 0          |
|                               | <b>#2</b>         | <b>#2.1</b>          | 21.66           | 22.2              | 17.43        | 22.26      |
|                               |                   | <b>#2.2</b>          | 21.58           | 22.11             | 16.57        | 22.19      |
|                               |                   | <b>#2.3</b>          | 21.57           | 22.08             | 15.28        | 22.09      |
|                               | <b>#2 NRT</b>     |                      | 0               | 0                 | 0            | 0          |
|                               | <b>mean</b>       |                      | 21.64           | 22.13             | 16.99        | 22.14      |
|                               | <b>SD</b>         |                      | 0.04            | 0.06              | 0.61         | 0.06       |
| <b>mCh_mRNA<sup>2CP</sup></b> | <b>#1</b>         | <b>#1.1</b>          | 21.87           | 21.9              | 18.12        | 22.14      |
|                               |                   | <b>#1.2</b>          | 21.81           | 21.92             | 17.23        | 22.12      |
|                               |                   | <b>#1.3</b>          | 21.8            | 21.94             | 17.83        | 22.02      |
|                               | <b>#1 NRT</b>     |                      | 0               | 0                 | 0            | 0          |
|                               | <b>#2</b>         | <b>#2.1</b>          | 21.78           | 21.84             | 17.86        | 22.2       |
|                               |                   | <b>#2.2</b>          | 21.75           | 21.81             | 16.89        | 22.17      |
|                               |                   | <b>#2.3</b>          | 21.78           | 22                | 16.49        | 22.18      |
|                               | <b>#2 NRT</b>     |                      | 0               | 0                 | 0            | 0          |
|                               | <b>mean</b>       |                      | 21.80           | 21.90             | 17.40        | 22.14      |
|                               | <b>SD</b>         |                      | 0.02            | 0.05              | 0.47         | 0.03       |
| <b>mCh_mRNA<sup>1PM</sup></b> | <b>#1</b>         | <b>#1.1</b>          | 21.45           | 22.08             | 17.01        | 22.27      |
|                               |                   | <b>#1.2</b>          | 21.43           | 21.98             | 17.46        | 22.26      |
|                               |                   | <b>#1.3</b>          | 21.41           | 21.96             | 16.64        | 22.22      |

|                                              |               |             |       |       |       |       |
|----------------------------------------------|---------------|-------------|-------|-------|-------|-------|
|                                              | <b>#1 NRT</b> |             | 0     | 0     | 0     | 0     |
|                                              | <b>#2</b>     | <b>#2.1</b> | 21.35 | 21.9  | 16.03 | 22.09 |
|                                              |               | <b>#2.2</b> | 21.25 | 21.77 | 16.94 | 22.03 |
|                                              |               | <b>#2.3</b> | 21.22 | 21.91 | 17.46 | 22.07 |
|                                              | <b>#2 NRT</b> |             | 0     | 0     | 0     | 0     |
|                                              | <b>mean</b>   |             | 21.35 | 21.93 | 16.92 | 22.16 |
|                                              | <b>SD</b>     |             | 0.04  | 0.06  | 0.46  | 0.02  |
| <b>mCh_mRNA<sup>2PM</sup></b>                | <b>#1</b>     | <b>#1.1</b> | 21.07 | 21.56 | 18.31 | 22.06 |
|                                              |               | <b>#1.2</b> | 20.98 | 21.5  | 16.59 | 21.98 |
|                                              |               | <b>#1.3</b> | 21    | 21.51 | 16.67 | 21.96 |
|                                              | <b>#1 NRT</b> |             | 0     | 0     | 0     | 0     |
|                                              | <b>#2</b>     | <b>#2.1</b> | 21.05 | 21.63 | 16.69 | 22.06 |
|                                              |               | <b>#2.2</b> | 21.03 | 21.59 | 17.85 | 22.04 |
|                                              |               | <b>#2.3</b> | 20.95 | 21.55 | 16.73 | 22.01 |
|                                              | <b>#2 NRT</b> |             | 0     | 0     | 0     | 0     |
|                                              | <b>mean</b>   |             | 21.01 | 21.56 | 17.14 | 22.02 |
|                                              | <b>SD</b>     |             | 0.04  | 0.03  | 0.67  | 0.03  |
| <b>mCh_mRNA<sub>UTR2</sub><sup>WT</sup></b>  | <b>#1</b>     | <b>#1.1</b> | 20.94 | 21.45 | 18.67 | 22.09 |
|                                              |               | <b>#1.2</b> | 20.84 | 21.51 | 17.25 | 22.01 |
|                                              |               | <b>#1.3</b> | 20.82 | 21.46 | 17.41 | 22.1  |
|                                              | <b>#1 NRT</b> |             | 0     | 0     | 0     | 0     |
|                                              | <b>#2</b>     | <b>#2.1</b> | 20.76 | 21.36 | 16.05 | 21.94 |
|                                              |               | <b>#2.2</b> | 20.7  | 21.33 | 17.17 | 21.9  |
|                                              |               | <b>#2.3</b> | 20.7  | 21.4  | 13.95 | 21.9  |
|                                              | <b>#2 NRT</b> |             | 0     | 38.36 | 31.23 | 0     |
|                                              | <b>mean</b>   |             | 20.79 | 21.42 | 16.75 | 21.99 |
|                                              | <b>SD</b>     |             | 0.04  | 0.03  | 0.98  | 0.03  |
| <b>mCh_mRNA<sub>UTR2</sub><sup>1CP</sup></b> | <b>#1</b>     | <b>#1.1</b> | 21.7  | 21.74 | 16.79 | 22.21 |
|                                              |               | <b>#1.2</b> | 21.52 | 21.57 | 17.54 | 22.02 |
|                                              |               | <b>#1.3</b> | 21.52 | 21.62 | 15.75 | 22.08 |
|                                              | <b>#1 NRT</b> |             | 0     | 0     | 0     | 0     |
|                                              | <b>#2</b>     | <b>#2.1</b> | 21.58 | 21.66 | 17.87 | 22.12 |
|                                              |               | <b>#2.2</b> | 21.63 | 21.69 | 17.6  | 22.06 |
|                                              |               | <b>#2.3</b> | 21.59 | 21.67 | 16.69 | 22.05 |
|                                              | <b>#2 NRT</b> |             | 0     | 0     | 0     | 0     |
|                                              | <b>mean</b>   |             | 21.59 | 21.66 | 17.04 | 22.09 |
|                                              | <b>SD</b>     |             | 0.05  | 0.04  | 0.62  | 0.06  |
| <b>mCh_mRNA<sub>UTR2</sub><sup>2CP</sup></b> | <b>#1</b>     | <b>#1.1</b> | 21.73 | 21.58 | 17.69 | 22.1  |
|                                              |               | <b>#1.2</b> | 21.68 | 21.55 | 17.87 | 22.13 |
|                                              |               | <b>#1.3</b> | 21.66 | 21.52 | 17.86 | 22.05 |
|                                              | <b>#1 NRT</b> |             | 0     | 0     | 0     | 0     |

|                                               |               |             |       |       |       |       |
|-----------------------------------------------|---------------|-------------|-------|-------|-------|-------|
|                                               | <b>#2</b>     | <b>#2.1</b> | 21.79 | 21.66 | 17.62 | 22.08 |
|                                               |               | <b>#2.2</b> | 21.77 | 21.67 | 16.55 | 22.13 |
|                                               |               | <b>#2.3</b> | 21.82 | 21.72 | 18.04 | 22.09 |
|                                               | <b>#2 NRT</b> |             | 0     | 0     | 0     | 0     |
|                                               | <b>mean</b>   |             | 21.74 | 21.62 | 17.61 | 22.10 |
|                                               | <b>SD</b>     |             | 0.02  | 0.03  | 0.35  | 0.03  |
| <b>mCh_mRNA<sub>UTR2</sub><sup>1 PM</sup></b> | <b>#1</b>     | <b>#1.1</b> | 21.16 | 21.86 | 17.15 | 22.3  |
|                                               |               | <b>#1.2</b> | 21.11 | 21.8  | 16.68 | 22.25 |
|                                               |               | <b>#1.3</b> | 21.04 | 21.71 | 15.9  | 22.18 |
|                                               | <b>#1 NRT</b> |             | 0     | 0     | 0     | 0     |
|                                               | <b>#2</b>     | <b>#2.1</b> | 20.73 | 21.33 | 16.62 | 22.04 |
|                                               |               | <b>#2.2</b> | 20.67 | 21.31 | 16.69 | 22.08 |
|                                               |               | <b>#2.3</b> | 20.71 | 21.37 | 17.21 | 22.04 |
|                                               | <b>#2 NRT</b> |             | 0     | 0     | 0     | 0     |
|                                               | <b>mean</b>   |             | 20.90 | 21.56 | 16.71 | 22.15 |
| <b>SD</b>                                     |               | 0.04        | 0.04  | 0.39  | 0.03  |       |
| <b>mCh_mRNA<sub>UTR2</sub><sup>2 PM</sup></b> | <b>#1</b>     | <b>#1.1</b> | 21.1  | 21.61 | 18.02 | 22.19 |
|                                               |               | <b>#1.2</b> | 21.06 | 21.57 | 17.5  | 22.08 |
|                                               |               | <b>#1.3</b> | 21.16 | 21.56 | 16.51 | 22.15 |
|                                               | <b>#1 NRT</b> |             | 0     | 40.5  | 0     | 0     |
|                                               | <b>#2</b>     | <b>#2.1</b> | 21.3  | 21.71 | 16.64 | 22.2  |
|                                               |               | <b>#2.2</b> | 21.12 | 21.65 | 17.36 | 22.15 |
|                                               |               | <b>#2.3</b> | 21.17 | 21.72 | 16.57 | 22.19 |
|                                               | <b>#2 NRT</b> |             | 0     | 0     | 0     | 0     |
|                                               | <b>mean</b>   |             | 21.15 | 21.64 | 17.10 | 22.16 |
| <b>SD</b>                                     |               | 0.06        | 0.03  | 0.49  | 0.03  |       |
| <b>H<sub>2</sub>O Ctrl.</b>                   | <b>#1</b>     | <b>#1.1</b> | 0     | 0     | 19.72 | 22.23 |
|                                               |               | <b>#1.2</b> | 0     | 0     | 15.57 | 22.25 |
|                                               | <b>#1 NRT</b> |             | 0     | 0     | 0     | 0     |
|                                               | <b>#2</b>     | <b>#2.1</b> | 0     | 0     | 16.72 | 22.3  |
|                                               |               | <b>#2.2</b> | 0     | 0     | 17.6  | 22.32 |
|                                               | <b>#2 NRT</b> |             | 0     | 0     | 0     | 0     |
|                                               | <b>mean</b>   |             | 0.00  | 0.00  | 17.40 | 22.28 |
| <b>SD</b>                                     |               | 0.00        | 0.00  | 1.26  | 0.01  |       |
| <b>Untreated Cells</b>                        | <b>#1</b>     | <b>#1.1</b> | 0     | 0     | 17.57 | 22.37 |
|                                               |               | <b>#1.2</b> | 0     | 0     | 18.33 | 22.29 |
|                                               |               | <b>#1.3</b> | 0     | 0     | 17.57 | 22.32 |
|                                               | <b>#1 NRT</b> |             | 0     | 0     | 0     | 0     |
|                                               | <b>#2</b>     | <b>#2.1</b> | 0     | 0     | 15.8  | 22.35 |
|                                               |               | <b>#2.2</b> | 0     | 0     | 16.72 | 22.32 |
|                                               |               | <b>#2.3</b> | 0     | 0     | 16.55 | 22.35 |
|                                               | <b>#2 NRT</b> |             | 0     | 0     | 0     | 0     |
|                                               | <b>mean</b>   |             | 0.00  | 0.00  | 17.09 | 22.33 |
| <b>SD</b>                                     |               | 0.00        | 0.00  | 0.38  | 0.02  |       |



|     |    |  |   |   |   |   |
|-----|----|--|---|---|---|---|
| NTC | #1 |  | 0 | 0 | 0 | 0 |
|     | #2 |  | 0 | 0 | 0 | 0 |

$$\Delta C_t = C_t(\text{mCh}) - C_t(\text{GAPDH})$$

|                                         | $\Delta C_t$<br>(mCh 3'end) | error | $\Delta C_t$<br>(mCh internal) | error |
|-----------------------------------------|-----------------------------|-------|--------------------------------|-------|
| mCh_mRNA <sup>WT</sup>                  | -0.86                       | 0.08  | -0.11                          | 0.06  |
| mCh_mRNA <sup>1CP</sup>                 | -0.50                       | 0.07  | -0.02                          | 0.08  |
| mCh_mRNA <sup>2CP</sup>                 | -0.34                       | 0.04  | -0.24                          | 0.06  |
| mCh_mRNA <sup>1PM</sup>                 | -0.81                       | 0.04  | -0.22                          | 0.06  |
| mCh_mRNA <sup>2PM</sup>                 | -1.01                       | 0.05  | -0.46                          | 0.04  |
| mCh_mRNA <sub>UTR2</sub> <sup>WT</sup>  | -1.20                       | 0.05  | -0.57                          | 0.04  |
| mCh_mRNA <sub>UTR2</sub> <sup>1CP</sup> | -0.50                       | 0.08  | -0.43                          | 0.07  |
| mCh_mRNA <sub>UTR2</sub> <sup>2CP</sup> | -0.35                       | 0.04  | -0.48                          | 0.04  |
| mCh_mRNA <sub>UTR2</sub> <sup>1PM</sup> | -1.24                       | 0.05  | -0.58                          | 0.06  |
| mCh_mRNA <sub>UTR2</sub> <sup>2PM</sup> | -1.01                       | 0.07  | -0.52                          | 0.04  |
| H <sub>2</sub> O Ctrl.                  | -22.28                      | 0.01  | -22.28                         | 0.01  |
| Untreated cells                         | -22.33                      | 0.02  | -22.33                         | 0.02  |

#### mCh\_mRNA + mCh\_mRNA<sup>ψ+5mC</sup> data set 1, cell lysis 6 h post transfection

##### C<sub>t</sub> values

|                         | Duplicate Samples | Technical Triplicats | Ct values       |                   | β-Actin: ROX | GAPDH: Cy5 |
|-------------------------|-------------------|----------------------|-----------------|-------------------|--------------|------------|
|                         |                   |                      | mCh 3' end: FAM | mCh internal: HEX |              |            |
| mCh_mRNA <sup>WT</sup>  | #1                | #1.1                 | 17.09           | 17.52             | 20.72        | 21.88      |
|                         |                   | #1.2                 | 17.01           | 17.49             | 19.52        | 21.85      |
|                         |                   | #1.3                 | 17.02           | 17.51             | 20.62        | 21.88      |
|                         | #1 NRT            |                      | 0               | 0                 | 25.71        | 0          |
|                         | #2                | #2.1                 | 17.27           | 17.75             | 21.08        | 22.27      |
|                         |                   | #2.2                 | 17.1            | 17.81             | 20.3         | 22.11      |
|                         |                   | #2.3                 | 17              | 17.55             | 20.81        | 22.02      |
|                         | #2 NRT            |                      | 0               | 0                 | 36.67        | 0          |
|                         | mean              |                      | 17.08           | 17.61             | 20.51        | 22.00      |
|                         | SD                |                      | 0.07            | 0.06              | 0.43         | 0.06       |
| mCh_mRNA <sup>1CP</sup> | #1                | #1.1                 | 17.3            | 17.44             | 20.41        | 21.8       |
|                         |                   | #1.2                 | 17.29           | 17.45             | 20.4         | 21.78      |
|                         |                   | #1.3                 | 17.28           | 17.5              | 20.52        | 21.81      |
|                         | #1 NRT            |                      | 0               | 0                 | 0            | 0          |
|                         | #2                | #2.1                 | 16.91           | 17.27             | 20.25        | 21.69      |
|                         |                   | #2.2                 | 17.33           | 17.66             | 20.9         | 22.13      |

|                                                       |               |             |       |       |       |       |
|-------------------------------------------------------|---------------|-------------|-------|-------|-------|-------|
|                                                       |               | <b>#2.3</b> | 17.07 | 17.41 | 20.39 | 21.88 |
|                                                       | <b>#2 NRT</b> |             | 0     | 0     | 0     | 0     |
|                                                       | <b>mean</b>   |             | 17.20 | 17.46 | 20.48 | 21.85 |
|                                                       | <b>SD</b>     |             | 0.09  | 0.09  | 0.17  | 0.10  |
| <b>mCh_mRNA<sup>2 CP</sup></b>                        | <b>#1</b>     | <b>#1.1</b> | 17.75 | 17.54 | 20.56 | 21.8  |
|                                                       |               | <b>#1.2</b> | 16.69 | 17.53 | 20.38 | 21.75 |
|                                                       |               | <b>#1.3</b> | 17.69 | 17.54 | 20.38 | 21.76 |
|                                                       | <b>#1 NRT</b> |             | 0     | 0     | 0     | 0     |
|                                                       | <b>#2</b>     | <b>#2.1</b> | 17.77 | 17.65 | 19.72 | 21.83 |
|                                                       |               | <b>#2.2</b> | 17.73 | 17.73 | 19.4  | 21.8  |
|                                                       |               | <b>#2.3</b> | 17.83 | 17.68 | 19.34 | 21.86 |
|                                                       | <b>#2 NRT</b> |             | 0     | 0     | 0     | 0     |
|                                                       | <b>mean</b>   |             | 17.58 | 17.61 | 19.96 | 21.80 |
|                                                       | <b>SD</b>     |             | 0.26  | 0.02  | 0.13  | 0.02  |
| <b>mCh_mRNA<sup>WT, <math>\Psi</math>+5mC</sup></b>   | <b>#1</b>     | <b>#1.1</b> | 17.38 | 18.05 | 20.36 | 21.69 |
|                                                       |               | <b>#1.2</b> | 17.31 | 17.97 | 19.25 | 21.62 |
|                                                       |               | <b>#1.3</b> | 17.25 | 17.73 | 20.29 | 21.57 |
|                                                       | <b>#1 NRT</b> |             | 0     | 0     | 0     | 0     |
|                                                       | <b>#2</b>     | <b>#2.1</b> | 17.47 | 18.13 | 19.39 | 21.67 |
|                                                       |               | <b>#2.2</b> | 17.43 | 18.11 | 20.4  | 21.65 |
|                                                       |               | <b>#2.3</b> | 17.5  | 18.19 | 20.46 | 21.73 |
|                                                       | <b>#2 NRT</b> |             | 0     | 0     | 0     | 0     |
|                                                       | <b>mean</b>   |             | 17.39 | 18.03 | 20.03 | 21.66 |
|                                                       | <b>SD</b>     |             | 0.04  | 0.08  | 0.50  | 0.04  |
| <b>mCh_mRNA<sup>1 CP, <math>\Psi</math>+5mC</sup></b> | <b>#1</b>     | <b>#1.1</b> | 17.56 | 18.06 | 20.51 | 21.75 |
|                                                       |               | <b>#1.2</b> | 17.41 | 17.96 | 19.64 | 21.6  |
|                                                       |               | <b>#1.3</b> | 17.42 | 17.96 | 20.31 | 21.65 |
|                                                       | <b>#1 NRT</b> |             | 0     | 0     | 0     | 0     |
|                                                       | <b>#2</b>     | <b>#2.1</b> | 17.42 | 17.76 | 20.4  | 21.67 |
|                                                       |               | <b>#2.2</b> | 17.43 | 17.96 | 20.37 | 21.68 |
|                                                       |               | <b>#2.3</b> | 17.41 | 17.96 | 20.3  | 21.67 |
|                                                       | <b>#2 NRT</b> |             | 0     | 0     | 0     | 0     |
|                                                       | <b>mean</b>   |             | 17.44 | 17.94 | 20.26 | 21.67 |
|                                                       | <b>SD</b>     |             | 0.04  | 0.07  | 0.21  | 0.03  |
| <b>mCh_mRNA<sup>2 CP, <math>\Psi</math>+5mC</sup></b> | <b>#1</b>     | <b>#1.1</b> | 18.62 | 18.19 | 20.11 | 21.88 |
|                                                       |               | <b>#1.2</b> | 18.44 | 18.06 | 19.05 | 21.73 |
|                                                       |               | <b>#1.3</b> | 18.4  | 17.89 | 19.31 | 21.74 |
|                                                       | <b>#1 NRT</b> |             | 0     | 0     | 0     | 0     |
|                                                       | <b>#2</b>     | <b>#2.1</b> | 17.97 | 17.91 | 19.55 | 21.71 |
|                                                       |               | <b>#2.2</b> | 18.09 | 17.92 | 19.3  | 21.7  |
|                                                       |               | <b>#2.3</b> | 17.93 | 17.86 | 20.37 | 21.7  |

|                        |                             |             |             |       |       |       |
|------------------------|-----------------------------|-------------|-------------|-------|-------|-------|
|                        | <b>#2 NRT</b>               |             | 0           | 0     | 0     | 0     |
|                        | <b>mean</b>                 |             | 18.24       | 17.97 | 19.62 | 21.74 |
|                        | <b>SD</b>                   |             | 0.08        | 0.07  | 0.45  | 0.04  |
| <b>Untreated Cells</b> | <b>#1</b>                   | <b>#1.1</b> | 0           | 0     | 21.03 | 21.79 |
|                        |                             | <b>#1.2</b> | 0           | 0     | 21.08 | 21.86 |
|                        |                             | <b>#1.3</b> | 0           | 0     | 20.94 | 21.83 |
|                        | <b>#1 NRT</b>               |             | 0           | 0     | 0     | 0     |
|                        | <b>#2</b>                   | <b>#2.1</b> | 0           | 0     | 20.82 | 21.61 |
|                        |                             | <b>#2.2</b> | 0           | 0     | 20.9  | 21.75 |
|                        |                             | <b>#2.3</b> | 0           | 0     | 20.76 | 21.53 |
|                        | <b>#2 NRT</b>               |             | 0           | 0     | 0     | 0     |
|                        | <b>mean</b>                 |             | 0.00        | 0.00  | 20.92 | 21.73 |
|                        | <b>SD</b>                   |             | 0.00        | 0.00  | 0.06  | 0.06  |
|                        | <b>H<sub>2</sub>O Ctrl.</b> | <b>#1</b>   | <b>#1.1</b> | 0     | 0     | 20.79 |
|                        |                             | <b>#1.2</b> | 0           | 0     | 20.62 | 21.45 |
|                        |                             | <b>#1.3</b> | 0           | 0     | 20.61 | 21.45 |
| <b>#1 NRT</b>          |                             |             | 0           | 0     | 0     | 0     |
| <b>#2</b>              |                             | <b>#2.1</b> | 0           | 39.35 | 20.61 | 21.53 |
|                        |                             | <b>#2.2</b> | 0           | 38.93 | 20.66 | 21.49 |
|                        |                             | <b>#2.3</b> | 0           | 38.69 | 18.91 | 21.68 |
| <b>#2 NRT</b>          |                             |             | 0           | 0     | 0     | 0     |
| <b>mean</b>            |                             |             | 0.00        | 19.50 | 20.37 | 21.56 |
| <b>SD</b>              |                             |             | 0.00        | 0.14  | 0.45  | 0.11  |
| <b>NTC</b>             | <b>#1</b>                   |             | 0           | 0     | 0     | 0     |
|                        | <b>#2</b>                   |             | 0           | 0     | 0     | 0     |

$$\Delta C_t = C_t(\text{mCh}) - C_t(\text{GAPDH})$$

|                                                       | <b><math>\Delta C_t</math><br/>(mCh 3'end)</b> | <b>error</b> | <b><math>\Delta C_t</math><br/>(mCh internal)</b> | <b>error</b> |
|-------------------------------------------------------|------------------------------------------------|--------------|---------------------------------------------------|--------------|
| <b>mCh_mRNA<sup>WT</sup></b>                          | -4.92                                          | 0.09         | -4.40                                             | 0.09         |
| <b>mCh_mRNA<sup>1 CP</sup></b>                        | -4.65                                          | 0.13         | -4.39                                             | 0.13         |
| <b>mCh_mRNA<sup>2 CP</sup></b>                        | -4.22                                          | 0.26         | -4.19                                             | 0.03         |
| <b>mCh_mRNA<sup>WT, <math>\Psi+5mC</math></sup></b>   | -4.27                                          | 0.06         | -3.63                                             | 0.09         |
| <b>mCh_mRNA<sup>1 CP, <math>\Psi+5mC</math></sup></b> | -4.23                                          | 0.05         | -3.73                                             | 0.08         |
| <b>mCh_mRNA<sup>2 CP, <math>\Psi+5mC</math></sup></b> | -3.50                                          | 0.09         | -3.77                                             | 0.08         |
| <b>H<sub>2</sub>O Ctrl.</b>                           | -21.73                                         | 0.06         | -21.73                                            | 0.06         |
| <b>Untreated cells</b>                                | -21.56                                         | 0.11         | -2.06                                             | 0.17         |

mCh\_mRNA + mCh\_mRNA<sup>Ψ+5mC</sup> data set 1, cell lysis 24 h post transfection

C<sub>t</sub> values

|                               | Duplicate Samples | Technical Triplicats | Ct values       |                   |              |            |
|-------------------------------|-------------------|----------------------|-----------------|-------------------|--------------|------------|
|                               |                   |                      | mCh 3' end: FAM | mCh internal: HEX | β-Actin: ROX | GAPDH: Cy5 |
| mCh_mRNA <sup>WT</sup>        | #1                | #1.1                 | 19.41           | 19.71             | 21.63        | 22.29      |
|                               |                   | #1.2                 | 19.3            | 19.57             | 21.54        | 22.22      |
|                               |                   | #1.3                 | 19.27           | 19.7              | 21.54        | 22.22      |
|                               | #1 NRT            |                      | 0               | 0                 | 0            | 0          |
|                               | #2                | #2.1                 | 19.12           | 19.53             | 21.38        | 22.02      |
|                               |                   | #2.2                 | 19.09           | 19.52             | 21.35        | 22.01      |
|                               |                   | #2.3                 | 19.37           | 19.92             | 21.61        | 22.17      |
|                               | #2 NRT            |                      | 0               | 0                 | 0            | 0          |
|                               | mean              |                      | 19.26           | 19.66             | 21.51        | 22.16      |
|                               | SD                |                      | 0.09            | 0.13              | 0.08         | 0.05       |
| mCh_mRNA <sup>1CP</sup>       | #1                | #1.1                 | 19.56           | 19.61             | 21.41        | 22.04      |
|                               |                   | #1.2                 | 19.53           | 19.63             | 21.42        | 22.02      |
|                               |                   | #1.3                 | 19.53           | 19.7              | 21.41        | 22.06      |
|                               | #1 NRT            |                      | 0               | 0                 | 0            | 0          |
|                               | #2                | #2.1                 | 19.3            | 19.53             | 21.43        | 22.1       |
|                               |                   | #2.2                 | 19.28           | 19.49             | 21.45        | 22.1       |
|                               |                   | #2.3                 | 19.22           | 19.49             | 21.38        | 22.06      |
|                               | #2 NRT            |                      | 0               | 0                 | 0            | 0          |
|                               | mean              |                      | 19.40           | 19.58             | 21.42        | 22.06      |
|                               | SD                |                      | 0.02            | 0.03              | 0.02         | 0.02       |
| mCh_mRNA <sup>2CP</sup>       | #1                | #1.1                 | 20.19           | 20.02             | 21.38        | 22.03      |
|                               |                   | #1.2                 | 20.12           | 20                | 21.29        | 21.96      |
|                               |                   | #1.3                 | 20.1            | 20.01             | 21.35        | 21.95      |
|                               | #1 NRT            |                      | 0               | 0                 | 0            | 0          |
|                               | #2                | #2.1                 | 20.11           | 20.11             | 21.25        | 21.86      |
|                               |                   | #2.2                 | 20.22           | 20.11             | 21.31        | 21.9       |
|                               |                   | #2.3                 | 20.2            | 20.11             | 21.35        | 22         |
|                               | #2 NRT            |                      | 0               | 0                 | 0            | 0          |
|                               | mean              |                      | 20.16           | 20.06             | 21.32        | 21.95      |
|                               | SD                |                      | 0.04            | 0.00              | 0.04         | 0.05       |
| mCh_mRNA <sup>WT, Ψ+5mC</sup> | #1                | #1.1                 | 19.89           | 20.4              | 21.34        | 22.05      |
|                               |                   | #1.2                 | 19.68           | 20.15             | 21.21        | 21.88      |
|                               |                   | #1.3                 | 19.67           | 20.25             | 21.17        | 21.86      |
|                               | #1 NRT            |                      | 0               | 0                 | 0            | 0          |
|                               | #2                | #2.1                 | 19.83           | 20.4              | 21.24        | 21.86      |
|                               |                   | #2.2                 | 19.92           | 20.49             | 21.3         | 21.97      |

|                                                       |               |             |       |       |       |       |
|-------------------------------------------------------|---------------|-------------|-------|-------|-------|-------|
|                                                       |               | <b>#2.3</b> | 19.95 | 20.57 | 21.38 | 22.01 |
|                                                       | <b>#2 NRT</b> |             | 0     | 0     | 0     | 0     |
|                                                       | <b>mean</b>   |             | 19.82 | 20.38 | 21.27 | 21.94 |
|                                                       | <b>SD</b>     |             | 0.08  | 0.09  | 0.06  | 0.07  |
| <b>mCh_mRNA<sup>1</sup> CP, <math>\Psi</math>+5mC</b> | <b>#1</b>     | <b>#1.1</b> | 20.17 | 20.52 | 21.49 | 22.08 |
|                                                       |               | <b>#1.2</b> | 20.03 | 20.38 | 21.26 | 21.93 |
|                                                       |               | <b>#1.3</b> | 20.31 | 21.08 | 21.61 | 22.34 |
|                                                       | <b>#1 NRT</b> |             | 0     | 0     | 0     | 0     |
|                                                       | <b>#2</b>     | <b>#2.1</b> | 19.86 | 20.26 | 21.18 | 21.78 |
|                                                       |               | <b>#2.2</b> | 20.01 | 20.36 | 21.31 | 21.94 |
|                                                       |               | <b>#2.3</b> | 19.99 | 20.4  | 21.35 | 21.94 |
|                                                       | <b>#2 NRT</b> |             | 0     | 0     | 39.47 | 0     |
|                                                       | <b>mean</b>   |             | 20.06 | 20.50 | 21.37 | 22.00 |
|                                                       | <b>SD</b>     |             | 0.09  | 0.18  | 0.11  | 0.12  |
| <b>mCh_mRNA<sup>2</sup> CP, <math>\Psi</math>+5mC</b> | <b>#1</b>     | <b>#1.1</b> | 21.24 | 21.13 | 21.6  | 22.22 |
|                                                       |               | <b>#1.2</b> | 21.13 | 21.01 | 21.47 | 22.13 |
|                                                       |               | <b>#1.3</b> | 21.07 | 20.95 | 21.46 | 22.09 |
|                                                       | <b>#1 NRT</b> |             | 0     | 0     | 0     | 0     |
|                                                       | <b>#2</b>     | <b>#2.1</b> | 20.8  | 20.72 | 21.25 | 21.89 |
|                                                       |               | <b>#2.2</b> | 20.68 | 20.6  | 21.22 | 21.82 |
|                                                       |               | <b>#2.3</b> | 20.68 | 20.63 | 21.26 | 21.83 |
|                                                       | <b>#2 NRT</b> |             | 0     | 0     | 0     | 0     |
|                                                       | <b>mean</b>   |             | 20.93 | 20.84 | 21.38 | 22.00 |
|                                                       | <b>SD</b>     |             | 0.06  | 0.06  | 0.04  | 0.04  |
| <b>Untreated Cells</b>                                | <b>#1</b>     | <b>#1.1</b> | 0     | 0     | 21.58 | 22.13 |
|                                                       |               | <b>#1.2</b> | 0     | 0     | 21.41 | 21.97 |
|                                                       |               | <b>#1.3</b> | 0     | 0     | 21.42 | 21.94 |
|                                                       | <b>#1 NRT</b> |             | 0     | 0     | 39.14 | 0     |
|                                                       | <b>#2</b>     | <b>#2.1</b> | 0     | 0     | 21.43 | 21.98 |
|                                                       |               | <b>#2.2</b> | 0     | 0     | 21.43 | 21.95 |
|                                                       |               | <b>#2.3</b> | 0     | 0     | 21.34 | 21.89 |
|                                                       | <b>#2 NRT</b> |             | 0     | 0     | 0     | 0     |
|                                                       | <b>mean</b>   |             | 0.00  | 0.00  | 21.44 | 21.98 |
|                                                       | <b>SD</b>     |             | 0.00  | 0.00  | 0.06  | 0.06  |
| <b>H<sub>2</sub>O Ctrl.</b>                           | <b>#1</b>     | <b>#1.1</b> | 0     | 0     | 21.75 | 22.11 |
|                                                       |               | <b>#1.2</b> | 0     | 0     | 21.54 | 22    |
|                                                       |               | <b>#1.3</b> | 0     | 0     | 21.54 | 21.96 |
|                                                       | <b>#1 NRT</b> |             | 0     | 0     | 0     | 0     |
|                                                       | <b>#2</b>     | <b>#2.1</b> | 0     | 0     | 21.65 | 22.07 |
|                                                       |               | <b>#2.2</b> | 0     | 0     | 21.52 | 22.08 |
|                                                       |               | <b>#2.3</b> | 0     | 0     | 21.66 | 22.12 |
| <b>#2 NRT</b>                                         |               | 0           | 0     | 0     | 0     |       |

|            |             |  |      |      |       |       |
|------------|-------------|--|------|------|-------|-------|
|            | <b>mean</b> |  | 0.00 | 0.00 | 21.61 | 22.06 |
|            | <b>SD</b>   |  | 0.00 | 0.00 | 0.08  | 0.04  |
| <b>NTC</b> | <b>#1</b>   |  | 0    | 0    | 0     | 0     |
|            | <b>#2</b>   |  | 0    | 0    | 0     | 0     |

$$\Delta C_t = C_t(\text{mCh}) - C_t(\text{GAPDH})$$

|                                                 | <b><math>\Delta C_t</math><br/>(mCh 3'end)</b> | <b>error</b> | <b><math>\Delta C_t</math><br/>(mCh internal)</b> | <b>error</b> |
|-------------------------------------------------|------------------------------------------------|--------------|---------------------------------------------------|--------------|
| mCh_mRNA <sup>WT</sup>                          | -2.90                                          | 0.11         | -2.50                                             | 0.14         |
| mCh_mRNA <sup>1 CP</sup>                        | -2.66                                          | 0.03         | -2.49                                             | 0.03         |
| mCh_mRNA <sup>2 CP</sup>                        | -1.79                                          | 0.06         | -1.89                                             | 0.05         |
| mCh_mRNA <sup>WT, <math>\Psi+5mC</math></sup>   | -2.12                                          | 0.11         | -1.56                                             | 0.11         |
| mCh_mRNA <sup>1 CP, <math>\Psi+5mC</math></sup> | -1.94                                          | 0.15         | -1.50                                             | 0.22         |
| mCh_mRNA <sup>2 CP, <math>\Psi+5mC</math></sup> | -1.06                                          | 0.08         | -1.16                                             | 0.08         |
| H <sub>2</sub> O Ctrl.                          | -21.98                                         | 0.06         | -21.98                                            | 0.06         |
| Untreated cells                                 | -22.06                                         | 0.04         | -22.06                                            | 0.04         |

#### mCh\_mRNA + mCh\_mRNA <sup>$\Psi+5mC$</sup> data set 1, cell lysis 48 h post transfection

##### C<sub>t</sub> values

|                                | <b>Duplicate Samples</b> | <b>Technical Triplicats</b> | <b>Ct values</b>           |                              |                                      |                   |
|--------------------------------|--------------------------|-----------------------------|----------------------------|------------------------------|--------------------------------------|-------------------|
|                                |                          |                             | <b>mCh 3' end:<br/>FAM</b> | <b>mCh internal:<br/>HEX</b> | <b><math>\beta</math>-Actin: ROX</b> | <b>GAPDH: Cy5</b> |
| <b>mCh_mRNA<sup>WT</sup></b>   | <b>#1</b>                | <b>#1.1</b>                 | 21.71                      | 22.47                        | 16.55                                | 22.32             |
|                                |                          | <b>#1.2</b>                 | 21.6                       | 22.39                        | 17.36                                | 22.26             |
|                                |                          | <b>#1.3</b>                 | 21.6                       | 22.54                        | 19.02                                | 22.31             |
|                                | <b>#1 NRT</b>            |                             | 0                          | 0                            | 20.92                                | 0                 |
|                                | <b>#2</b>                | <b>#2.1</b>                 | 21.54                      | 22.26                        | 18.69                                | 22.31             |
|                                |                          | <b>#2.2</b>                 | 21.62                      | 22.54                        | 15.98                                | 22.45             |
|                                |                          | <b>#2.3</b>                 | 21.65                      | 22.58                        | 15.79                                | 22.48             |
|                                | <b>#2 NRT</b>            |                             | 0                          | 0                            | 0                                    | 0                 |
|                                | <b>mean</b>              |                             | 21.62                      | 22.46                        | 17.23                                | 22.36             |
|                                | <b>SD</b>                |                             | 0.05                       | 0.10                         | 1.18                                 | 0.05              |
| <b>mCh_mRNA<sup>1 CP</sup></b> | <b>#1</b>                | <b>#1.1</b>                 | 22.04                      | 22.49                        | 17.5                                 | 22.46             |
|                                |                          | <b>#1.2</b>                 | 21.97                      | 22.52                        | 17.12                                | 22.4              |
|                                |                          | <b>#1.3</b>                 | 22.02                      | 22.58                        | 17.31                                | 22.35             |
|                                | <b>#1 NRT</b>            |                             | 0                          | 0                            | 0                                    | 0                 |
|                                | <b>#2</b>                | <b>#2.1</b>                 | 22.03                      | 22.55                        | 13.08                                | 22.42             |
|                                |                          | <b>#2.2</b>                 | 22.16                      | 22.8                         | 17.78                                | 22.56             |
|                                |                          | <b>#2.3</b>                 | 22.07                      | 22.81                        | 17.27                                | 22.55             |
|                                | <b>#2 NRT</b>            |                             | 0                          | 0                            | 0                                    | 0                 |

|                                                       |               |             |       |       |       |       |
|-------------------------------------------------------|---------------|-------------|-------|-------|-------|-------|
|                                                       | <b>mean</b>   |             | 22.05 | 22.63 | 16.68 | 22.46 |
|                                                       | <b>SD</b>     |             | 0.04  | 0.08  | 1.13  | 0.05  |
| <b>mCh_mRNA<sup>2 CP</sup></b>                        | <b>#1</b>     | <b>#1.1</b> | 22.39 | 22.54 | 17.33 | 22.33 |
|                                                       |               | <b>#1.2</b> | 22.36 | 22.57 | 15.09 | 22.32 |
|                                                       |               | <b>#1.3</b> | 22.25 | 22.57 | 16.61 | 22.28 |
|                                                       | <b>#1 NRT</b> |             | 0     | 0     | 0     | 0     |
|                                                       | <b>#2</b>     | <b>#2.1</b> | 22.63 | 23.04 | 14.24 | 22.53 |
|                                                       |               | <b>#2.2</b> | 22.65 | 23.05 | 17.29 | 22.57 |
|                                                       |               | <b>#2.3</b> | 22.57 | 23.02 | 16.21 | 22.51 |
|                                                       | <b>#2 NRT</b> |             | 0     | 0     | 24.86 | 0     |
|                                                       | <b>mean</b>   |             | 22.48 | 22.80 | 16.13 | 22.42 |
|                                                       | <b>SD</b>     |             | 0.05  | 0.01  | 1.10  | 0.02  |
| <b>mCh_mRNA<sup>WT, <math>\Psi</math>+5mC</sup></b>   | <b>#1</b>     | <b>#1.1</b> | 22    | 23.01 | 15.1  | 22.42 |
|                                                       |               | <b>#1.2</b> | 21.96 | 22.9  | 16.41 | 22.4  |
|                                                       |               | <b>#1.3</b> | 21.94 | 23.02 | 15.54 | 22.35 |
|                                                       | <b>#1 NRT</b> |             | 0     | 0     | 0     | 0     |
|                                                       | <b>#2</b>     | <b>#2.1</b> | 21.87 | 22.98 | 17.3  | 22.18 |
|                                                       |               | <b>#2.2</b> | 21.87 | 22.99 | 16.16 | 22.26 |
|                                                       |               | <b>#2.3</b> | 21.98 | 22.92 | 14.92 | 22.24 |
|                                                       | <b>#2 NRT</b> |             | 0     | 0     | 0     | 0     |
|                                                       | <b>mean</b>   |             | 21.94 | 22.97 | 15.91 | 22.31 |
|                                                       | <b>SD</b>     |             | 0.04  | 0.04  | 0.76  | 0.03  |
| <b>mCh_mRNA<sup>1 CP, <math>\Psi</math>+5mC</sup></b> | <b>#1</b>     | <b>#1.1</b> | 22.49 | 23.24 | 17.24 | 22.45 |
|                                                       |               | <b>#1.2</b> | 22.39 | 23.19 | 16.87 | 22.36 |
|                                                       |               | <b>#1.3</b> | 22.39 | 23.15 | 16.3  | 22.35 |
|                                                       | <b>#1 NRT</b> |             | 0     | 0     | 18.07 | 0     |
|                                                       | <b>#2</b>     | <b>#2.1</b> | 22.11 | 22.73 | 14.65 | 22.2  |
|                                                       |               | <b>#2.2</b> | 22.04 | 22.85 | 15.48 | 22.13 |
|                                                       |               | <b>#2.3</b> | 22.14 | 22.75 | 16.45 | 22.25 |
|                                                       | <b>#2 NRT</b> |             | 0     | 0     | 0     | 0     |
|                                                       | <b>mean</b>   |             | 22.26 | 22.99 | 16.17 | 22.29 |
|                                                       | <b>SD</b>     |             | 0.04  | 0.04  | 0.56  | 0.05  |
| <b>mCh_mRNA<sup>2 CP, <math>\Psi</math>+5mC</sup></b> | <b>#1</b>     | <b>#1.1</b> | 23.02 | 23.35 | 15.06 | 22.43 |
|                                                       |               | <b>#1.2</b> | 22.94 | 23.31 | 16.36 | 22.37 |
|                                                       |               | <b>#1.3</b> | 22.96 | 23.3  | 17.29 | 22.42 |
|                                                       | <b>#1 NRT</b> |             | 0     | 0     | 0     | 0     |
|                                                       | <b>#2</b>     | <b>#2.1</b> | 22.84 | 23.23 | 16.38 | 22.22 |
|                                                       |               | <b>#2.2</b> | 22.88 | 23.22 | 15.6  | 22.33 |
|                                                       |               | <b>#2.3</b> | 22.84 | 23.22 | 14.83 | 22.25 |
|                                                       | <b>#2 NRT</b> |             | 0     | 0     | 0     | 0     |
|                                                       | <b>mean</b>   |             | 22.91 | 23.27 | 15.92 | 22.34 |

|                             |               |             |      |      |       |       |
|-----------------------------|---------------|-------------|------|------|-------|-------|
|                             | <b>SD</b>     |             | 0.03 | 0.01 | 0.77  | 0.04  |
| <b>Untreated Cells</b>      | <b>#1</b>     | <b>#1.1</b> | 0    | 0    | 17.22 | 22.65 |
|                             |               | <b>#1.2</b> | 0    | 0    | 18.01 | 22.64 |
|                             |               | <b>#1.3</b> | 0    | 0    | 16.16 | 22.52 |
|                             | <b>#1 NRT</b> |             | 0    | 0    | 0     | 0     |
|                             | <b>#2</b>     | <b>#2.1</b> | 0    | 0    | 14.48 | 22.48 |
|                             |               | <b>#2.2</b> | 0    | 0    | 16.46 | 22.48 |
|                             |               | <b>#2.3</b> | 0    | 0    | 16.26 | 22.5  |
|                             | <b>#2 NRT</b> |             | 0    | 0    | 0     | 0     |
|                             | <b>mean</b>   |             | 0.00 | 0.00 | 16.43 | 22.55 |
|                             | <b>SD</b>     |             | 0.00 | 0.00 | 0.82  | 0.03  |
| <b>H<sub>2</sub>O Ctrl.</b> | <b>#1</b>     | <b>#1.1</b> | 0    | 0    | 17.29 | 23    |
|                             |               | <b>#1.2</b> | 0    | 0    | 17.99 | 22.87 |
|                             |               | <b>#1.3</b> | 0    | 0    | 15.55 | 22.93 |
|                             | <b>#1 NRT</b> |             | 0    | 0    | 0     | 0     |
|                             | <b>#2</b>     | <b>#2.1</b> | 0    | 0    | 16.98 | 22.39 |
|                             |               | <b>#2.2</b> | 0    | 0    | 15.58 | 22.41 |
|                             |               | <b>#2.3</b> | 0    | 0    | 15.42 | 22.43 |
|                             | <b>#2 NRT</b> |             | 0    | 0    | 0     | 0     |
|                             | <b>mean</b>   |             | 0.00 | 0.00 | 16.47 | 22.67 |
|                             | <b>SD</b>     |             | 0.00 | 0.00 | 0.86  | 0.03  |
| <b>NTC</b>                  | <b>#1</b>     |             | 0    | 0    | 14.31 | 0     |
|                             | <b>#2</b>     |             | 0    | 0    | 0     | 0     |

$$\Delta C_t = C_t(\text{mCh}) - C_t(\text{GAPDH})$$

|                                                 | $\Delta C_t$<br>(mCh 3'end) | error | $\Delta C_t$<br>(mCh internal) | error |
|-------------------------------------------------|-----------------------------|-------|--------------------------------|-------|
| mCh_mRNA <sup>WT</sup>                          | -0.73                       | 0.07  | 0.11                           | 0.11  |
| mCh_mRNA <sup>1 CP</sup>                        | -0.41                       | 0.07  | 0.17                           | 0.10  |
| mCh_mRNA <sup>2 CP</sup>                        | 0.05                        | 0.05  | 0.38                           | 0.03  |
| mCh_mRNA <sup>WT, <math>\Psi+5mC</math></sup>   | -0.37                       | 0.05  | 0.66                           | 0.05  |
| mCh_mRNA <sup>1 CP, <math>\Psi+5mC</math></sup> | -0.03                       | 0.06  | 0.70                           | 0.06  |
| mCh_mRNA <sup>2 CP, <math>\Psi+5mC</math></sup> | 0.58                        | 0.04  | 0.93                           | 0.04  |
| H <sub>2</sub> O Ctrl.                          | -22.55                      | 0.03  | -22.55                         | 0.03  |
| Untreated cells                                 | -22.67                      | 0.03  | -22.67                         | 0.03  |

mCh\_mRNA + mCh\_mRNA <sup>$\Psi+5mC$</sup>  data set 2, cell lysis 6 h post transfection

C<sub>t</sub> values

|                        | Duplicate Samples | Technical Triplicats | Ct values          |                      |                     |            |
|------------------------|-------------------|----------------------|--------------------|----------------------|---------------------|------------|
|                        |                   |                      | mCh 3' end:<br>FAM | mCh internal:<br>HEX | $\beta$ -Actin: ROX | GAPDH: Cy5 |
| mCh_mRNA <sup>WT</sup> | #1                | #1.1                 | 17.04              | 17.14                | 18.34               | 21.99      |



|                                       |               |             |       |       |       |       |
|---------------------------------------|---------------|-------------|-------|-------|-------|-------|
|                                       |               | <b>#1.2</b> | 16.94 | 17.18 | 18.07 | 21.93 |
|                                       |               | <b>#1.3</b> | 16.86 | 17.04 | 18.39 | 21.89 |
|                                       | <b>#1 NRT</b> |             | 0     | 0     | 0     | 0     |
|                                       | <b>#2</b>     | <b>#2.1</b> | 16.95 | 17.25 | 18.35 | 21.91 |
|                                       |               | <b>#2.2</b> | 16.94 | 17.25 | 18.07 | 21.92 |
|                                       |               | <b>#2.3</b> | 16.96 | 17.12 | 18.12 | 21.96 |
|                                       | <b>#2 NRT</b> |             | 0     | 0     | 0     | 0     |
|                                       | <b>mean</b>   |             | 16.95 | 17.16 | 18.22 | 21.93 |
|                                       | <b>SD</b>     |             | 0.04  | 0.06  | 0.13  | 0.03  |
| <b>mCh_mRNA<sup>1 CP</sup></b>        | <b>#1</b>     | <b>#1.1</b> | 17.43 | 17.38 | 18.12 | 21.9  |
|                                       |               | <b>#1.2</b> | 17.34 | 17.36 | 18.6  | 21.78 |
|                                       |               | <b>#1.3</b> | 17.32 | 17.36 | 17.81 | 21.82 |
|                                       | <b>#1 NRT</b> |             | 0     | 39.02 | 21.22 | 0     |
|                                       | <b>#2</b>     | <b>#2.1</b> | 17.36 | 17.41 | 17.24 | 22.05 |
|                                       |               | <b>#2.2</b> | 17.35 | 17.36 | 18.87 | 21.94 |
|                                       |               | <b>#2.3</b> | 17.28 | 17.31 | 18.15 | 21.85 |
|                                       | <b>#2 NRT</b> |             | 0     | 0     | 0     | 0     |
|                                       | <b>mean</b>   |             | 17.35 | 17.36 | 18.13 | 21.89 |
| <b>SD</b>                             |               | 0.04        | 0.03  | 0.50  | 0.07  |       |
| <b>mCh_mRNA<sup>2 CP</sup></b>        | <b>#1</b>     | <b>#1.1</b> | 17.78 | 17.39 | 17.94 | 21.89 |
|                                       |               | <b>#1.2</b> | 17.68 | 17.32 | 18.72 | 21.79 |
|                                       |               | <b>#1.3</b> | 17.71 | 17.23 | 17.32 | 21.84 |
|                                       | <b>#1 NRT</b> |             | 0     | 0     | 0     | 0     |
|                                       | <b>#2</b>     | <b>#2.1</b> | 17.81 | 17.44 | 18.53 | 21.85 |
|                                       |               | <b>#2.2</b> | 17.76 | 17.4  | 17.15 | 21.82 |
|                                       |               | <b>#2.3</b> | 17.79 | 17.44 | 18.11 | 21.84 |
|                                       | <b>#2 NRT</b> |             | 0     | 0     | 0     | 0     |
|                                       | <b>mean</b>   |             | 17.76 | 17.37 | 17.96 | 21.84 |
| <b>SD</b>                             |               | 0.03        | 0.04  | 0.58  | 0.03  |       |
| <b>mCh_mRNA<sup>WT, Ψ+5mC</sup></b>   | <b>#1</b>     | <b>#1.1</b> | 17.39 | 17.59 | 18.86 | 21.76 |
|                                       |               | <b>#1.2</b> | 17.27 | 17.4  | 17.87 | 21.64 |
|                                       |               | <b>#1.3</b> | 17.27 | 17.48 | 18.84 | 21.66 |
|                                       | <b>#1 NRT</b> |             | 0     | 0     | 0     | 0     |
|                                       | <b>#2</b>     | <b>#2.1</b> | 17.33 | 17.64 | 18.01 | 21.69 |
|                                       |               | <b>#2.2</b> | 17.31 | 17.63 | 17    | 21.67 |
|                                       |               | <b>#2.3</b> | 17.34 | 17.65 | 17.61 | 21.73 |
|                                       | <b>#2 NRT</b> |             | 0     | 0     | 0     | 0     |
|                                       | <b>mean</b>   |             | 17.32 | 17.57 | 18.03 | 21.69 |
| <b>SD</b>                             |               | 0.03        | 0.04  | 0.44  | 0.04  |       |
| <b>mCh_mRNA<sup>1 CP, Ψ+5mC</sup></b> | <b>#1</b>     | <b>#1.1</b> | 17.61 | 17.73 | 17.69 | 21.75 |
|                                       |               | <b>#1.2</b> | 17.44 | 17.55 | 18.52 | 21.6  |

|                                       |               |             |       |       |       |       |
|---------------------------------------|---------------|-------------|-------|-------|-------|-------|
|                                       |               | <b>#1.3</b> | 17.4  | 17.52 | 18.28 | 21.54 |
|                                       | <b>#1 NRT</b> |             | 0     | 0     | 0     | 0     |
|                                       | <b>#2</b>     | <b>#2.1</b> | 17.5  | 17.61 | 16.55 | 21.68 |
|                                       |               | <b>#2.2</b> | 17.51 | 17.6  | 18.47 | 21.69 |
|                                       |               | <b>#2.3</b> | 17.51 | 17.63 | 16.97 | 21.88 |
|                                       | <b>#2 NRT</b> |             | 0     | 40.05 | 0     | 0     |
|                                       | <b>mean</b>   |             | 17.50 | 17.61 | 17.75 | 21.69 |
|                                       | <b>SD</b>     |             | 0.05  | 0.05  | 0.59  | 0.09  |
| <b>mCh_mRNA<sup>2 CP, Ψ+5mC</sup></b> | <b>#1</b>     | <b>#1.1</b> | 18.49 | 18.05 | 18.52 | 21.79 |
|                                       |               | <b>#1.2</b> | 18.32 | 17.88 | 17.58 | 21.62 |
|                                       |               | <b>#1.3</b> | 18.31 | 17.83 | 17.39 | 21.64 |
|                                       | <b>#1 NRT</b> |             | 0     | 0     | 0     | 0     |
|                                       | <b>#2</b>     | <b>#2.1</b> | 18.26 | 17.91 | 17.6  | 21.67 |
|                                       |               | <b>#2.2</b> | 18.28 | 17.78 | 17.82 | 21.6  |
|                                       |               | <b>#2.3</b> | 18.3  | 17.8  | 18    | 21.59 |
|                                       | <b>#2 NRT</b> |             | 0     | 0     | 0     | 0     |
|                                       | <b>mean</b>   |             | 18.33 | 17.88 | 17.82 | 21.65 |
|                                       | <b>SD</b>     |             | 0.05  | 0.08  | 0.33  | 0.06  |
| <b>Untreated Cells</b>                | <b>#1</b>     | <b>#1.1</b> | 0     | 0     | 19.11 | 21.95 |
|                                       |               | <b>#1.2</b> | 0     | 0     | 18.23 | 21.84 |
|                                       |               | <b>#1.3</b> | 0     | 0     | 18.59 | 21.85 |
|                                       | <b>#1 NRT</b> |             | 0     | 0     | 0     | 0     |
|                                       | <b>#2</b>     | <b>#2.1</b> | 0     | 0     | 18.37 | 21.76 |
|                                       |               | <b>#2.2</b> | 0     | 0     | 18.22 | 21.71 |
|                                       |               | <b>#2.3</b> | 0     | 0     | 20.64 | 22.61 |
|                                       | <b>#2 NRT</b> |             | 0     | 0     | 0     | 0     |
|                                       | <b>mean</b>   |             | 0.00  | 0.00  | 18.86 | 21.95 |
|                                       | <b>SD</b>     |             | 0.00  | 0.00  | 0.73  | 0.23  |
| <b>H<sub>2</sub>O Ctrl.</b>           | <b>#1</b>     | <b>#1.1</b> | 0     | 40.51 | 17.78 | 21.94 |
|                                       |               | <b>#1.2</b> | 0     | 39.82 | 18.35 | 21.82 |
|                                       |               | <b>#1.3</b> | 0     | 40.53 | 17    | 21.76 |
|                                       | <b>#1 NRT</b> |             | 0     | 0     | 0     | 0     |
|                                       | <b>#2</b>     | <b>#2.1</b> | 0     | 0     | 17.23 | 21.8  |
|                                       |               | <b>#2.2</b> | 0     | 0     | 17.67 | 21.69 |
|                                       |               | <b>#2.3</b> | 0     | 0     | 17.23 | 21.8  |
|                                       | <b>#2 NRT</b> |             | 0     | 0     | 0     | 0     |
|                                       | <b>mean</b>   |             | 0.00  | 20.14 | 17.54 | 21.80 |
|                                       | <b>SD</b>     |             | 0.00  | 0.17  | 0.38  | 0.06  |
| <b>NTC</b>                            | <b>#1</b>     |             | 0     | 0     | 0     | 0     |
|                                       | <b>#2</b>     |             | 0     | 0     | 0     | 0     |

$$\Delta C_t = C_t(\text{mCh}) - C_t(\text{GAPDH})$$

|                                                 | $\Delta C_t$<br>(mCh 3'end) | error | $\Delta C_t$<br>(mCh internal) | error |
|-------------------------------------------------|-----------------------------|-------|--------------------------------|-------|
| mCh_mRNA <sup>WT</sup>                          | -4.99                       | 0.05  | -4.77                          | 0.07  |
| mCh_mRNA <sup>1 CP</sup>                        | -4.54                       | 0.08  | -4.53                          | 0.07  |
| mCh_mRNA <sup>2 CP</sup>                        | -4.08                       | 0.04  | -4.47                          | 0.05  |
| mCh_mRNA <sup>WT, <math>\Psi+5mC</math></sup>   | -4.37                       | 0.05  | -4.13                          | 0.06  |
| mCh_mRNA <sup>1 CP, <math>\Psi+5mC</math></sup> | -4.20                       | 0.10  | -4.08                          | 0.10  |
| mCh_mRNA <sup>2 CP, <math>\Psi+5mC</math></sup> | -3.33                       | 0.07  | -3.78                          | 0.09  |
| H <sub>2</sub> O Ctrl.                          | -21.95                      | 0.23  | -21.95                         | 0.23  |
| Untreated cells                                 | -21.80                      | 0.06  | -1.66                          | 0.18  |

### mCh\_mRNA + mCh\_mRNA <sup>$\Psi+5mC$</sup> data set 2, cell lysis 24 h post transfection

#### C<sub>t</sub> values

|                          | Duplicate Samples | Technical Triplicats | Ct values          |                      |                     |            |
|--------------------------|-------------------|----------------------|--------------------|----------------------|---------------------|------------|
|                          |                   |                      | mCh 3' end:<br>FAM | mCh internal:<br>HEX | $\beta$ -Actin: ROX | GAPDH: Cy5 |
| mCh_mRNA <sup>WT</sup>   | #1                | #1.1                 | 19.14              | 19.83                | 19.56               | 21.93      |
|                          |                   | #1.2                 | 18.98              | 19.63                | 19.08               | 21.8       |
|                          |                   | #1.3                 | 18.98              | 19.68                | 19.21               | 21.82      |
|                          | #1 NRT            |                      | 0                  | 0                    | 41.14               | 0          |
|                          | #2                | #2.1                 | 19.09              | 19.79                | 19.24               | 22.02      |
|                          |                   | #2.2                 | 19.07              | 19.96                | 17.54               | 22.02      |
|                          |                   | #2.3                 | 19.09              | 19.97                | 19.47               | 22.04      |
|                          | #2 NRT            |                      | 0                  | 0                    | 0                   | 0          |
|                          | mean              |                      | 19.06              | 19.81                | 19.02               | 21.94      |
|                          | SD                |                      | 0.04               | 0.08                 | 0.53                | 0.03       |
| mCh_mRNA <sup>1 CP</sup> | #1                | #1.1                 | 19.5               | 20.02                | 19.5                | 22.2       |
|                          |                   | #1.2                 | 19.42              | 19.97                | 18.62               | 22.16      |
|                          |                   | #1.3                 | 19.3               | 19.82                | 19.47               | 22.14      |
|                          | #1 NRT            |                      | 0                  | 0                    | 41.52               | 0          |
|                          | #2                | #2.1                 | 19.24              | 19.88                | 19.15               | 22.12      |
|                          |                   | #2.2                 | 19.23              | 19.9                 | 18.24               | 22.14      |
|                          |                   | #2.3                 | 19.19              | 19.86                | 19.33               | 22.11      |
|                          | #2 NRT            |                      | 0                  | 0                    | 0                   | 0          |
|                          | mean              |                      | 19.31              | 19.91                | 19.05               | 22.15      |
|                          | SD                |                      | 0.05               | 0.05                 | 0.44                | 0.02       |
| mCh_mRNA <sup>2 CP</sup> | #1                | #1.1                 | 20.08              | 20.26                | 19.22               | 22.14      |
|                          |                   | #1.2                 | 19.97              | 20.16                | 17.87               | 22.08      |
|                          |                   | #1.3                 | 20.01              | 20.2                 | 19.16               | 22.09      |
|                          | #1 NRT            |                      | 0                  | 0                    | 0                   | 0          |

|                                                       |               |             |       |       |       |       |
|-------------------------------------------------------|---------------|-------------|-------|-------|-------|-------|
|                                                       | <b>#2</b>     | <b>#2.1</b> | 20.03 | 20.2  | 18.37 | 22.13 |
|                                                       |               | <b>#2.2</b> | 19.97 | 20.15 | 18.56 | 22.09 |
|                                                       |               | <b>#2.3</b> | 19.99 | 20.21 | 19.04 | 22.13 |
|                                                       | <b>#2 NRT</b> |             | 0     | 0     | 0     | 0     |
|                                                       | <b>mean</b>   |             | 20.01 | 20.20 | 18.70 | 22.11 |
|                                                       | <b>SD</b>     |             | 0.04  | 0.03  | 0.45  | 0.02  |
| <b>mCh_mRNA<sup>WT</sup>, <math>\Psi+5mC</math></b>   | <b>#1</b>     | <b>#1.1</b> | 19.69 | 20.57 | 18.47 | 21.72 |
|                                                       |               | <b>#1.2</b> | 19.58 | 20.48 | 18.73 | 21.69 |
|                                                       |               | <b>#1.3</b> | 19.55 | 20.45 | 18.35 | 21.64 |
|                                                       | <b>#1 NRT</b> |             | 0     | 0     | 0     | 0     |
|                                                       | <b>#2</b>     | <b>#2.1</b> | 19.7  | 20.59 | 19.15 | 21.78 |
|                                                       |               | <b>#2.2</b> | 19.69 | 20.75 | 18.45 | 21.93 |
|                                                       |               | <b>#2.3</b> | 19.74 | 20.71 | 18.98 | 21.99 |
|                                                       | <b>#2 NRT</b> |             | 0     | 0     | 0     | 0     |
|                                                       | <b>mean</b>   |             | 19.66 | 20.59 | 18.69 | 21.79 |
| <b>SD</b>                                             |               | 0.04        | 0.06  | 0.23  | 0.06  |       |
| <b>mCh_mRNA<sup>1 CP</sup>, <math>\Psi+5mC</math></b> | <b>#1</b>     | <b>#1.1</b> | 19.83 | 20.41 | 19.01 | 21.97 |
|                                                       |               | <b>#1.2</b> | 19.66 | 20.27 | 18.28 | 21.75 |
|                                                       |               | <b>#1.3</b> | 19.71 | 20.29 | 19.13 | 21.77 |
|                                                       | <b>#1 NRT</b> |             | 0     | 0     | 0     | 0     |
|                                                       | <b>#2</b>     | <b>#2.1</b> | 20.01 | 20.78 | 19.24 | 22.06 |
|                                                       |               | <b>#2.2</b> | 20.03 | 20.66 | 18.48 | 22.08 |
|                                                       |               | <b>#2.3</b> | 20    | 20.69 | 18.07 | 22.08 |
|                                                       | <b>#2 NRT</b> |             | 0     | 0     | 0     | 0     |
|                                                       | <b>mean</b>   |             | 19.87 | 20.52 | 18.70 | 21.95 |
| <b>SD</b>                                             |               | 0.04        | 0.06  | 0.43  | 0.05  |       |
| <b>mCh_mRNA<sup>2 CP</sup>, <math>\Psi+5mC</math></b> | <b>#1</b>     | <b>#1.1</b> | 20.94 | 21.15 | 18.49 | 22.03 |
|                                                       |               | <b>#1.2</b> | 20.79 | 21.07 | 18.73 | 21.82 |
|                                                       |               | <b>#1.3</b> | 20.73 | 21.01 | 18.2  | 21.74 |
|                                                       | <b>#1 NRT</b> |             | 0     | 0     | 0     | 0     |
|                                                       | <b>#2</b>     | <b>#2.1</b> | 20.57 | 20.83 | 18.25 | 21.88 |
|                                                       |               | <b>#2.2</b> | 20.53 | 20.81 | 18.55 | 21.87 |
|                                                       |               | <b>#2.3</b> | 20.51 | 20.7  | 16.81 | 21.85 |
|                                                       | <b>#2 NRT</b> |             | 0     | 0     | 0     | 0     |
|                                                       | <b>mean</b>   |             | 20.68 | 20.93 | 18.17 | 21.87 |
| <b>SD</b>                                             |               | 0.06        | 0.06  | 0.49  | 0.07  |       |
| <b>Untreated Cells</b>                                | <b>#1</b>     | <b>#1.1</b> | 0     | 0     | 18.32 | 22.06 |
|                                                       |               | <b>#1.2</b> | 0     | 0     | 18.34 | 21.96 |
|                                                       |               | <b>#1.3</b> | 0     | 0     | 18.36 | 21.89 |
|                                                       | <b>#1 NRT</b> |             | 0     | 0     | 0     | 0     |
|                                                       | <b>#2</b>     | <b>#2.1</b> | 0     | 0     | 18.27 | 22.11 |

|                             |               |             |      |      |       |       |
|-----------------------------|---------------|-------------|------|------|-------|-------|
|                             |               | <b>#2.2</b> | 0    | 0    | 18.89 | 22.12 |
|                             |               | <b>#2.3</b> | 0    | 0    | 17.56 | 22.14 |
|                             | <b>#2 NRT</b> |             | 0    | 0    | 0     | 0     |
|                             | <b>mean</b>   |             | 0.00 | 0.00 | 18.29 | 22.05 |
|                             | <b>SD</b>     |             | 0.00 | 0.00 | 0.28  | 0.04  |
| <b>H<sub>2</sub>O Ctrl.</b> | <b>#1</b>     | <b>#1.1</b> | 0    | 0    | 18.49 | 22.11 |
|                             |               | <b>#1.2</b> | 0    | 0    | 18.26 | 22.01 |
|                             |               | <b>#1.3</b> | 0    | 0    | 17.67 | 21.97 |
|                             | <b>#1 NRT</b> |             | 0    | 0    | 0     | 0     |
|                             | <b>#2</b>     | <b>#2.1</b> | 0    | 0    | 18.21 | 21.99 |
|                             |               | <b>#2.2</b> | 0    | 0    | 18.12 | 21.92 |
|                             |               | <b>#2.3</b> | 0    | 0    | 18.15 | 21.93 |
|                             | <b>#2 NRT</b> |             | 0    | 0    | 0     | 0     |
|                             | <b>mean</b>   |             | 0.00 | 0.00 | 18.15 | 21.99 |
|                             | <b>SD</b>     |             | 0.00 | 0.00 | 0.19  | 0.04  |
| <b>NTC</b>                  | <b>#1</b>     |             | 0    | 0    | 0     | 0     |
|                             | <b>#2</b>     |             | 0    | 0    | 0     | 0     |

$$\Delta C_t = C_t(\text{mCh}) - C_t(\text{GAPDH})$$

|                                                 | $\Delta C_t$<br>(mCh 3'end) | error | $\Delta C_t$<br>(mCh internal) | error |
|-------------------------------------------------|-----------------------------|-------|--------------------------------|-------|
| mCh_mRNA <sup>WT</sup>                          | -2.88                       | 0.05  | -2.13                          | 0.09  |
| mCh_mRNA <sup>1 CP</sup>                        | -2.83                       | 0.06  | -2.24                          | 0.05  |
| mCh_mRNA <sup>2 CP</sup>                        | -2.10                       | 0.04  | -1.91                          | 0.04  |
| mCh_mRNA <sup>WT, <math>\Psi+5mC</math></sup>   | -2.13                       | 0.07  | -1.20                          | 0.08  |
| mCh_mRNA <sup>1 CP, <math>\Psi+5mC</math></sup> | -2.08                       | 0.07  | -1.44                          | 0.08  |
| mCh_mRNA <sup>2 CP, <math>\Psi+5mC</math></sup> | -1.19                       | 0.09  | -0.94                          | 0.09  |
| H <sub>2</sub> O Ctrl.                          | -22.05                      | 0.04  | -22.05                         | 0.04  |
| Untreated cells                                 | -21.99                      | 0.04  | -21.99                         | 0.04  |

### mCh\_mRNA + mCh\_mRNA <sup>$\Psi+5mC$</sup> data set 2, cell lysis 48 h post transfection

#### C<sub>t</sub> values

|                              | Duplicate Samples | Technical Triplicats | Ct values          |                      |                     |            |
|------------------------------|-------------------|----------------------|--------------------|----------------------|---------------------|------------|
|                              |                   |                      | mCh 3' end:<br>FAM | mCh internal:<br>HEX | $\beta$ -Actin: ROX | GAPDH: Cy5 |
| <b>mCh_mRNA<sup>WT</sup></b> | <b>#1</b>         | <b>#1.1</b>          | 21.38              | 22.18                | 19.77               | 22.39      |
|                              |                   | <b>#1.2</b>          | 21.42              | 22.15                | 19.65               | 22.37      |
|                              |                   | <b>#1.3</b>          | 21.37              | 22.15                | 20.34               | 22.35      |
|                              | <b>#1 NRT</b>     |                      | 0                  | 0                    | 0                   | 0          |
|                              | <b>#2</b>         | <b>#2.1</b>          | 21.84              | 22.74                | 20.09               | 22.45      |
|                              |                   | <b>#2.2</b>          | 21.8               | 22.74                | 20.39               | 22.43      |

|                                       |               |             |       |       |       |       |
|---------------------------------------|---------------|-------------|-------|-------|-------|-------|
|                                       |               | <b>#2.3</b> | 21.83 | 22.78 | 21.11 | 22.47 |
|                                       | <b>#2 NRT</b> |             | 0     | 0     | 0     | 0     |
|                                       | <b>mean</b>   |             | 21.61 | 22.46 | 20.23 | 22.41 |
|                                       | <b>SD</b>     |             | 0.02  | 0.02  | 0.36  | 0.02  |
| <b>mCh_mRNA<sup>1 CP</sup></b>        | <b>#1</b>     | <b>#1.1</b> | 22.19 | 22.7  | 20.19 | 22.54 |
|                                       |               | <b>#1.2</b> | 22.16 | 22.72 | 20.31 | 22.5  |
|                                       |               | <b>#1.3</b> | 22.04 | 22.68 | 20.44 | 22.49 |
|                                       | <b>#1 NRT</b> |             | 0     | 0     | 0     | 0     |
|                                       | <b>#2</b>     | <b>#2.1</b> | 21.87 | 22.4  | 19.7  | 22.37 |
|                                       |               | <b>#2.2</b> | 21.88 | 22.52 | 20.29 | 22.39 |
|                                       |               | <b>#2.3</b> | 21.78 | 22.38 | 19.63 | 22.41 |
|                                       | <b>#2 NRT</b> |             | 0     | 0     | 29.18 | 0     |
|                                       | <b>mean</b>   |             | 21.99 | 22.57 | 20.09 | 22.45 |
|                                       | <b>SD</b>     |             | 0.05  | 0.04  | 0.20  | 0.02  |
| <b>mCh_mRNA<sup>2 CP</sup></b>        | <b>#1</b>     | <b>#1.1</b> | 22.86 | 23.11 | 20.47 | 22.73 |
|                                       |               | <b>#1.2</b> | 22.77 | 23.11 | 19.52 | 22.64 |
|                                       |               | <b>#1.3</b> | 22.77 | 23.1  | 19.57 | 22.65 |
|                                       | <b>#1 NRT</b> |             | 0     | 0     | 0     | 0     |
|                                       | <b>#2</b>     | <b>#2.1</b> | 22.65 | 23.01 | 19.43 | 22.5  |
|                                       |               | <b>#2.2</b> | 22.58 | 22.96 | 19.77 | 22.47 |
|                                       |               | <b>#2.3</b> | 22.59 | 22.97 | 18.97 | 22.46 |
|                                       | <b>#2 NRT</b> |             | 0     | 0     | 0     | 0     |
|                                       | <b>mean</b>   |             | 22.70 | 23.04 | 19.62 | 22.58 |
|                                       | <b>SD</b>     |             | 0.04  | 0.01  | 0.38  | 0.03  |
| <b>mCh_mRNA<sup>WT, Ψ+5mC</sup></b>   | <b>#1</b>     | <b>#1.1</b> | 22.22 | 23.35 | 20.39 | 22.54 |
|                                       |               | <b>#1.2</b> | 21.97 | 23.25 | 19.87 | 22.45 |
|                                       |               | <b>#1.3</b> | 21.96 | 23.2  | 19.73 | 22.42 |
|                                       | <b>#1 NRT</b> |             | 0     | 0     | 0     | 0     |
|                                       | <b>#2</b>     | <b>#2.1</b> | 22.5  | 23.8  | 20.36 | 22.64 |
|                                       |               | <b>#2.2</b> | 22.52 | 23.71 | 20.37 | 22.68 |
|                                       |               | <b>#2.3</b> | 22.57 | 23.94 | 19.83 | 22.75 |
|                                       | <b>#2 NRT</b> |             | 0     | 0     | 0     | 0     |
|                                       | <b>mean</b>   |             | 22.29 | 23.54 | 20.09 | 22.58 |
|                                       | <b>SD</b>     |             | 0.07  | 0.08  | 0.27  | 0.05  |
| <b>mCh_mRNA<sup>1 CP, Ψ+5mC</sup></b> | <b>#1</b>     | <b>#1.1</b> | 23.17 | 24.05 | 20.13 | 22.73 |
|                                       |               | <b>#1.2</b> | 22.88 | 23.85 | 20.24 | 22.59 |
|                                       |               | <b>#1.3</b> | 22.88 | 23.73 | 18.67 | 22.59 |
|                                       | <b>#1 NRT</b> |             | 0     | 0     | 0     | 0     |
|                                       | <b>#2</b>     | <b>#2.1</b> | 23    | 23.99 | 20.19 | 22.73 |
|                                       |               | <b>#2.2</b> | 23.01 | 24.03 | 19.52 | 22.73 |
|                                       |               | <b>#2.3</b> | 22.98 | 24.02 | 20.46 | 22.74 |

|                                       |                        |             |             |       |       |       |
|---------------------------------------|------------------------|-------------|-------------|-------|-------|-------|
|                                       | <b>#2 NRT</b>          |             | 0           | 0     | 0     | 0     |
|                                       | <b>mean</b>            |             | 22.99       | 23.95 | 19.87 | 22.69 |
|                                       | <b>SD</b>              |             | 0.07        | 0.07  | 0.56  | 0.04  |
| <b>mCh_mRNA<sup>2 CP, Ψ+5mC</sup></b> | <b>#1</b>              | <b>#1.1</b> | 23.86       | 24.34 | 19.43 | 22.8  |
|                                       |                        | <b>#1.2</b> | 23.68       | 24.23 | 20.31 | 22.63 |
|                                       |                        | <b>#1.3</b> | 23.64       | 24.21 | 19.77 | 22.62 |
|                                       | <b>#1 NRT</b>          |             | 0           | 0     | 0     | 0     |
|                                       | <b>#2</b>              | <b>#2.1</b> | 23.66       | 24.19 | 19.69 | 22.61 |
|                                       |                        | <b>#2.2</b> | 23.56       | 24.11 | 19.33 | 22.57 |
|                                       |                        | <b>#2.3</b> | 23.58       | 24.14 | 19.4  | 22.62 |
|                                       | <b>#2 NRT</b>          |             | 0           | 0     | 0     | 0     |
|                                       | <b>mean</b>            |             | 23.66       | 24.20 | 19.66 | 22.64 |
|                                       | <b>SD</b>              |             | 0.07        | 0.05  | 0.26  | 0.05  |
|                                       | <b>Untreated Cells</b> | <b>#1</b>   | <b>#1.1</b> | 0     | 0     | 20.75 |
|                                       |                        | <b>#1.2</b> | 0           | 0     | 19.86 | 22.84 |
|                                       |                        | <b>#1.3</b> | 0           | 0     | 20.28 | 22.81 |
| <b>#1 NRT</b>                         |                        |             | 0           | 0     | 0     | 0     |
| <b>#2</b>                             |                        | <b>#2.1</b> | 0           | 0     | 20.75 | 22.86 |
|                                       |                        | <b>#2.2</b> | 0           | 0     | 20.86 | 22.9  |
|                                       |                        | <b>#2.3</b> | 0           | 0     | 20.5  | 22.86 |
| <b>#2 NRT</b>                         |                        |             | 0           | 0     | 0     | 0     |
| <b>mean</b>                           |                        |             | 0.00        | 0.00  | 20.50 | 22.88 |
| <b>SD</b>                             |                        | 0.00        | 0.00        | 0.26  | 0.05  |       |
| <b>H<sub>2</sub>O Ctrl.</b>           | <b>#1</b>              | <b>#1.1</b> | 0           | 0     | 20.42 | 22.57 |
|                                       |                        | <b>#1.2</b> | 0           | 0     | 19.55 | 22.46 |
|                                       |                        | <b>#1.3</b> | 0           | 0     | 19.23 | 22.47 |
|                                       | <b>#1 NRT</b>          |             | 0           | 0     | 0     | 0     |
|                                       | <b>#2</b>              | <b>#2.1</b> | 0           | 0     | 20.15 | 22.53 |
|                                       |                        | <b>#2.2</b> | 0           | 0     | 19.41 | 22.47 |
|                                       |                        | <b>#2.3</b> | 0           | 0     | 20.15 | 22.47 |
|                                       | <b>#2 NRT</b>          |             | 0           | 0     | 0     | 0     |
|                                       | <b>mean</b>            |             | 0.00        | 0.00  | 19.82 | 22.50 |
| <b>SD</b>                             |                        | 0.00        | 0.00        | 0.43  | 0.04  |       |
| <b>NTC</b>                            | <b>#1</b>              |             | 0           | 0     | 0     | 0     |
|                                       | <b>#2</b>              |             | 0           | 0     | 0     | 0     |

$$\Delta C_t = C_t(\text{mCh}) - C_t(\text{GAPDH})$$

|                                | <b>ΔCt<br/>(mCh 3'end)</b> | <b>error</b> | <b>ΔCt<br/>(mCh internal)</b> | <b>error</b> |
|--------------------------------|----------------------------|--------------|-------------------------------|--------------|
| <b>mCh_mRNA<sup>WT</sup></b>   | -0.80                      | 0.03         | 0.05                          | 0.02         |
| <b>mCh_mRNA<sup>1 CP</sup></b> | -0.46                      | 0.06         | 0.12                          | 0.04         |
| <b>mCh_mRNA<sup>2 CP</sup></b> | 0.13                       | 0.05         | 0.47                          | 0.03         |

|                                 |        |      |        |      |
|---------------------------------|--------|------|--------|------|
| mCh_mRNA <sup>WT, Ψ+5mC</sup>   | -0.29  | 0.09 | 0.96   | 0.09 |
| mCh_mRNA <sup>1 CP, Ψ+5mC</sup> | 0.30   | 0.08 | 1.26   | 0.08 |
| mCh_mRNA <sup>2 CP, Ψ+5mC</sup> | 1.02   | 0.09 | 1.56   | 0.07 |
| H <sub>2</sub> O Ctrl.          | -22.88 | 0.05 | -22.88 | 0.05 |
| Untreated cells                 | -22.50 | 0.04 | -22.50 | 0.04 |

### Combined $\Delta$ Ct values of all data sets

#### mCh\_mRNA 3' end primer + probe set

|                                         | 6 h                        |       | 24 h                       |       | 48 h                       |       |
|-----------------------------------------|----------------------------|-------|----------------------------|-------|----------------------------|-------|
|                                         | $\Delta$ Ct<br>(mCh 3'end) | error | $\Delta$ Ct<br>(mCh 3'end) | error | $\Delta$ Ct<br>(mCh 3'end) | error |
| mCh_mRNA <sup>WT</sup>                  | -5.17                      | 0.04  | -3.03                      | 0.04  | -0.79                      | 0.05  |
| mCh_mRNA <sup>1 CP</sup>                | -4.68                      | 0.05  | -2.72                      | 0.04  | -0.46                      | 0.06  |
| mCh_mRNA <sup>2 CP</sup>                | -4.20                      | 0.07  | -2.13                      | 0.03  | -0.06                      | 0.03  |
| mCh_mRNA <sup>WT, Ψ+5mC</sup>           | -4.32                      | 0.12  | -2.12                      | 0.17  | -0.33                      | 0.12  |
| mCh_mRNA <sup>1 CP, Ψ+5mC</sup>         | -4.21                      | 0.12  | -2.01                      | 0.20  | 0.14                       | 0.13  |
| mCh_mRNA <sup>2 CP, Ψ+5mC</sup>         | -3.41                      | 0.15  | -1.13                      | 0.15  | 0.80                       | 0.11  |
| mCh_mRNA <sup>1 PM</sup>                | -5.18                      | 0.06  | -3.29                      | 0.04  | -0.87                      | 0.07  |
| mCh_mRNA <sup>2 PM</sup>                | -5.29                      | 0.05  | -3.36                      | 0.06  | -1.02                      | 0.10  |
| mCh_mRNA <sup>UTR2<sup>WT</sup></sup>   | -5.36                      | 0.05  | -3.30                      | 0.04  | -1.16                      | 0.19  |
| mCh_mRNA <sup>UTR2<sup>1 CP</sup></sup> | -4.41                      | 0.04  | -2.56                      | 0.06  | -0.45                      | 0.13  |
| mCh_mRNA <sup>UTR2<sup>2 CP</sup></sup> | -4.29                      | 0.07  | -2.41                      | 0.05  | -0.18                      | 0.15  |
| mCh_mRNA <sup>UTR2<sup>1 PM</sup></sup> | -5.27                      | 0.05  | -3.31                      | 0.04  | -1.16                      | 0.04  |
| mCh_mRNA <sup>UTR2<sup>2 PM</sup></sup> | -5.11                      | 0.04  | -3.16                      | 0.06  | -1.00                      | 0.06  |

#### mCh\_mRNA internal primer + probe set

|                                         | 6 h                           |       | 24 h                          |       | 48 h                          |       |
|-----------------------------------------|-------------------------------|-------|-------------------------------|-------|-------------------------------|-------|
|                                         | $\Delta$ Ct<br>(mCh internal) | error | $\Delta$ Ct<br>(mCh internal) | error | $\Delta$ Ct<br>(mCh internal) | error |
| mCh_mRNA <sup>WT</sup>                  | -4.93                         | 0.04  | -2.46                         | 0.04  | -0.04                         | 0.05  |
| mCh_mRNA <sup>1 CP</sup>                | -4.62                         | 0.05  | -2.40                         | 0.04  | 0.05                          | 0.06  |
| mCh_mRNA <sup>2 CP</sup>                | -4.48                         | 0.04  | -2.07                         | 0.03  | 0.12                          | 0.03  |
| mCh_mRNA <sup>WT, Ψ+5mC</sup>           | -3.88                         | 0.16  | -1.38                         | 0.17  | 0.81                          | 0.12  |
| mCh_mRNA <sup>1 CP, Ψ+5mC</sup>         | -3.91                         | 0.15  | -1.47                         | 0.24  | 0.98                          | 0.13  |
| mCh_mRNA <sup>2 CP, Ψ+5mC</sup>         | -3.77                         | 0.15  | -1.05                         | 0.14  | 1.25                          | 0.10  |
| mCh_mRNA <sup>1 PM</sup>                | -5.00                         | 0.08  | -2.76                         | 0.04  | -0.28                         | 0.07  |
| mCh_mRNA <sup>2 PM</sup>                | -5.13                         | 0.11  | -2.80                         | 0.06  | -0.53                         | 0.10  |
| mCh_mRNA <sup>UTR2<sup>WT</sup></sup>   | -5.03                         | 0.10  | -2.73                         | 0.04  | -0.58                         | 0.19  |
| mCh_mRNA <sup>UTR2<sup>1 CP</sup></sup> | -4.56                         | 0.13  | -2.50                         | 0.07  | -0.38                         | 0.12  |



|                                          |       |      |       |      |       |      |
|------------------------------------------|-------|------|-------|------|-------|------|
| mCh_mRNA <sub>UTR2</sub> <sup>2 CP</sup> | -4.47 | 0.16 | -2.60 | 0.06 | -0.34 | 0.15 |
| mCh_mRNA <sub>UTR2</sub> <sup>1 PM</sup> | -5.03 | 0.12 | -2.77 | 0.03 | -0.62 | 0.04 |
| mCh_mRNA <sub>UTR2</sub> <sup>2 PM</sup> | -4.89 | 0.07 | -2.79 | 0.06 | -0.60 | 0.06 |

$$\Delta\Delta C_t = \Delta C_t(\text{mCh\_mRNA modified, any time}) - \Delta C_t(\text{mCh\_mRNA}^{\text{WT}}, 6\text{h})$$

#### mCh\_mRNA 3' end primer + probe set

|                                                 | 6 h                               |       | 24 h                              |       | 48 h                              |       |
|-------------------------------------------------|-----------------------------------|-------|-----------------------------------|-------|-----------------------------------|-------|
|                                                 | $\Delta\Delta C_t$<br>(mCh 3'end) | error | $\Delta\Delta C_t$<br>(mCh 3'end) | error | $\Delta\Delta C_t$<br>(mCh 3'end) | error |
| mCh_mRNA <sup>WT</sup>                          | 0.00                              | 0.06  | 2.14                              | 0.06  | 4.39                              | 0.07  |
| mCh_mRNA <sup>1 CP</sup>                        | 0.49                              | 0.06  | 2.45                              | 0.06  | 4.72                              | 0.07  |
| mCh_mRNA <sup>2 CP</sup>                        | 0.98                              | 0.08  | 3.04                              | 0.05  | 5.11                              | 0.05  |
| mCh_mRNA <sup>WT, <math>\Psi+5mC</math></sup>   | 0.85                              | 0.13  | 3.05                              | 0.17  | 4.84                              | 0.13  |
| mCh_mRNA <sup>1 CP, <math>\Psi+5mC</math></sup> | 0.96                              | 0.13  | 3.16                              | 0.20  | 5.31                              | 0.14  |
| mCh_mRNA <sup>2 CP, <math>\Psi+5mC</math></sup> | 1.76                              | 0.16  | 4.05                              | 0.15  | 5.97                              | 0.12  |
| mCh_mRNA <sup>1 PM</sup>                        | -0.01                             | 0.07  | 1.89                              | 0.06  | 4.30                              | 0.08  |
| mCh_mRNA <sup>2 PM</sup>                        | -0.12                             | 0.06  | 1.81                              | 0.07  | 4.15                              | 0.11  |
| mCh_mRNA <sub>UTR2</sub> <sup>WT</sup>          | -0.19                             | 0.06  | 1.87                              | 0.06  | 4.02                              | 0.19  |
| mCh_mRNA <sub>UTR2</sub> <sup>1 CP</sup>        | 0.76                              | 0.06  | 2.61                              | 0.07  | 4.73                              | 0.13  |
| mCh_mRNA <sub>UTR2</sub> <sup>2 CP</sup>        | 0.88                              | 0.08  | 2.76                              | 0.06  | 5.00                              | 0.15  |
| mCh_mRNA <sub>UTR2</sub> <sup>1 PM</sup>        | -0.10                             | 0.07  | 1.86                              | 0.06  | 4.01                              | 0.05  |
| mCh_mRNA <sub>UTR2</sub> <sup>2 PM</sup>        | 0.06                              | 0.06  | 2.02                              | 0.07  | 4.17                              | 0.07  |

#### mCh\_mRNA internal primer + probe set

|                                                 | 6 h                                  |       | 24 h                                 |       | 48 h                                 |       |
|-------------------------------------------------|--------------------------------------|-------|--------------------------------------|-------|--------------------------------------|-------|
|                                                 | $\Delta\Delta C_t$<br>(mCh internal) | error | $\Delta\Delta C_t$<br>(mCh internal) | error | $\Delta\Delta C_t$<br>(mCh internal) | error |
| mCh_mRNA <sup>WT</sup>                          | 0.00                                 | 0.05  | 2.47                                 | 0.06  | 4.89                                 | 0.07  |
| mCh_mRNA <sup>1 CP</sup>                        | 0.30                                 | 0.06  | 2.53                                 | 0.05  | 4.98                                 | 0.07  |
| mCh_mRNA <sup>2 CP</sup>                        | 0.45                                 | 0.05  | 2.86                                 | 0.05  | 5.05                                 | 0.05  |
| mCh_mRNA <sup>WT, <math>\Psi+5mC</math></sup>   | 1.05                                 | 0.16  | 3.55                                 | 0.18  | 5.74                                 | 0.13  |
| mCh_mRNA <sup>1 CP, <math>\Psi+5mC</math></sup> | 1.02                                 | 0.15  | 3.46                                 | 0.24  | 5.90                                 | 0.14  |
| mCh_mRNA <sup>2 CP, <math>\Psi+5mC</math></sup> | 1.15                                 | 0.16  | 3.88                                 | 0.15  | 6.17                                 | 0.11  |
| mCh_mRNA <sup>1 PM</sup>                        | -0.07                                | 0.09  | 2.17                                 | 0.05  | 4.64                                 | 0.08  |
| mCh_mRNA <sup>2 PM</sup>                        | -0.21                                | 0.11  | 2.13                                 | 0.07  | 4.39                                 | 0.10  |
| mCh_mRNA <sub>UTR2</sub> <sup>WT</sup>          | -0.11                                | 0.11  | 2.20                                 | 0.06  | 4.34                                 | 0.19  |
| mCh_mRNA <sub>UTR2</sub> <sup>1 CP</sup>        | 0.37                                 | 0.14  | 2.42                                 | 0.08  | 4.55                                 | 0.13  |
| mCh_mRNA <sub>UTR2</sub> <sup>2 CP</sup>        | 0.45                                 | 0.17  | 2.33                                 | 0.07  | 4.58                                 | 0.16  |
| mCh_mRNA <sub>UTR2</sub> <sup>1 PM</sup>        | -0.11                                | 0.13  | 2.15                                 | 0.05  | 4.31                                 | 0.06  |
| mCh_mRNA <sub>UTR2</sub> <sup>2 PM</sup>        | 0.03                                 | 0.08  | 2.13                                 | 0.07  | 4.32                                 | 0.07  |

Fold change  $2^{-\Delta\Delta Ct}$

mCh\_mRNA 3' end primer + probe set

|                                                 | 6 h                                   |       | 24 h                                  |       | 48 h                                  |       |
|-------------------------------------------------|---------------------------------------|-------|---------------------------------------|-------|---------------------------------------|-------|
|                                                 | $2^{-\Delta\Delta Ct}$<br>(mCh 3'end) | error | $2^{-\Delta\Delta Ct}$<br>(mCh 3'end) | error | $2^{-\Delta\Delta Ct}$<br>(mCh 3'end) | error |
| mCh_mRNA <sup>WT</sup>                          | 1.00                                  | 0.04  | 0.23                                  | 0.01  | 0.048                                 | 0.002 |
| mCh_mRNA <sup>1 CP</sup>                        | 0.71                                  | 0.03  | 0.18                                  | 0.01  | 0.038                                 | 0.002 |
| mCh_mRNA <sup>2 CP</sup>                        | 0.51                                  | 0.03  | 0.12                                  | 0.00  | 0.029                                 | 0.001 |
| mCh_mRNA <sup>WT, <math>\Psi+5mC</math></sup>   | 0.55                                  | 0.05  | 0.12                                  | 0.01  | 0.035                                 | 0.003 |
| mCh_mRNA <sup>1 CP, <math>\Psi+5mC</math></sup> | 0.51                                  | 0.05  | 0.11                                  | 0.02  | 0.025                                 | 0.002 |
| mCh_mRNA <sup>2 CP, <math>\Psi+5mC</math></sup> | 0.30                                  | 0.03  | 0.06                                  | 0.01  | 0.016                                 | 0.001 |
| mCh_mRNA <sup>1 PM</sup>                        | 1.00                                  | 0.05  | 0.27                                  | 0.01  | 0.051                                 | 0.003 |
| mCh_mRNA <sup>2 PM</sup>                        | 1.09                                  | 0.05  | 0.28                                  | 0.01  | 0.056                                 | 0.004 |
| mCh_mRNA <sup>UTR2<sup>WT</sup></sup>           | 1.14                                  | 0.05  | 0.27                                  | 0.01  | 0.062                                 | 0.008 |
| mCh_mRNA <sup>UTR2<sup>1 CP</sup></sup>         | 0.59                                  | 0.02  | 0.16                                  | 0.01  | 0.038                                 | 0.003 |
| mCh_mRNA <sup>UTR2<sup>2 CP</sup></sup>         | 0.54                                  | 0.03  | 0.15                                  | 0.01  | 0.031                                 | 0.003 |
| mCh_mRNA <sup>UTR2<sup>1 PM</sup></sup>         | 1.07                                  | 0.05  | 0.28                                  | 0.01  | 0.062                                 | 0.002 |
| mCh_mRNA <sup>UTR2<sup>2 PM</sup></sup>         | 0.96                                  | 0.04  | 0.25                                  | 0.01  | 0.055                                 | 0.003 |

mCh\_mRNA internal primer + probe set

|                                                 | 6 h                                      |       | 24 h                                  |       | 48 h                                  |       |
|-------------------------------------------------|------------------------------------------|-------|---------------------------------------|-------|---------------------------------------|-------|
|                                                 | $2^{-\Delta\Delta Ct}$<br>(mCh internal) | error | $2^{-\Delta\Delta Ct}$ (mCh internal) | error | $2^{-\Delta\Delta Ct}$ (mCh internal) | error |
| mCh_mRNA <sup>WT</sup>                          | 1.00                                     | 0.04  | 0.18                                  | 0.01  | 0.034                                 | 0.002 |
| mCh_mRNA <sup>1 CP</sup>                        | 0.81                                     | 0.03  | 0.17                                  | 0.01  | 0.032                                 | 0.002 |
| mCh_mRNA <sup>2 CP</sup>                        | 0.73                                     | 0.03  | 0.14                                  | 0.00  | 0.030                                 | 0.001 |
| mCh_mRNA <sup>WT, <math>\Psi+5mC</math></sup>   | 0.48                                     | 0.05  | 0.09                                  | 0.01  | 0.019                                 | 0.002 |
| mCh_mRNA <sup>1 CP, <math>\Psi+5mC</math></sup> | 0.49                                     | 0.05  | 0.09                                  | 0.02  | 0.017                                 | 0.002 |
| mCh_mRNA <sup>2 CP, <math>\Psi+5mC</math></sup> | 0.45                                     | 0.05  | 0.07                                  | 0.01  | 0.014                                 | 0.001 |
| mCh_mRNA <sup>1 PM</sup>                        | 1.05                                     | 0.07  | 0.22                                  | 0.01  | 0.040                                 | 0.002 |
| mCh_mRNA <sup>2 PM</sup>                        | 1.15                                     | 0.09  | 0.23                                  | 0.01  | 0.048                                 | 0.003 |
| mCh_mRNA <sup>UTR2<sup>WT</sup></sup>           | 1.08                                     | 0.08  | 0.22                                  | 0.01  | 0.049                                 | 0.007 |
| mCh_mRNA <sup>UTR2<sup>1 CP</sup></sup>         | 0.78                                     | 0.07  | 0.19                                  | 0.01  | 0.043                                 | 0.004 |
| mCh_mRNA <sup>UTR2<sup>2 CP</sup></sup>         | 0.73                                     | 0.08  | 0.20                                  | 0.01  | 0.042                                 | 0.005 |
| mCh_mRNA <sup>UTR2<sup>1 PM</sup></sup>         | 1.08                                     | 0.09  | 0.22                                  | 0.01  | 0.051                                 | 0.002 |
| mCh_mRNA <sup>UTR2<sup>2 PM</sup></sup>         | 0.98                                     | 0.05  | 0.23                                  | 0.01  | 0.050                                 | 0.002 |

## Ratios

| Time point [h] | 3' end                                                                 |       |                                                                          |       |
|----------------|------------------------------------------------------------------------|-------|--------------------------------------------------------------------------|-------|
|                | mCh_mRNA <sup>WT, <math>\Psi+5mC</math></sup> / mCh_mRNA <sup>WT</sup> | error | mCh_mRNA <sup>2 CP, <math>\Psi+5mC</math></sup> / mCh_mRNA <sup>WT</sup> | error |
| 6              | 0.55                                                                   | 0.05  | 0.30                                                                     | 0.03  |
| 24             | 0.54                                                                   | 0.07  | 0.27                                                                     | 0.03  |
| 48             | 0.73                                                                   | 0.07  | 0.33                                                                     | 0.03  |

| Time point [h] | internal                                                               |       |                                                                          |       |
|----------------|------------------------------------------------------------------------|-------|--------------------------------------------------------------------------|-------|
|                | mCh_mRNA <sup>WT, <math>\Psi+5mC</math></sup> / mCh_mRNA <sup>WT</sup> | error | mCh_mRNA <sup>2 CP, <math>\Psi+5mC</math></sup> / mCh_mRNA <sup>WT</sup> | error |
| 6              | 0.48                                                                   | 0.06  | 0.45                                                                     | 0.05  |
| 24             | 0.48                                                                   | 0.06  | 0.38                                                                     | 0.04  |
| 48             | 0.56                                                                   | 0.07  | 0.41                                                                     | 0.04  |

## Initial experiments for qPCR efficiencies in singleplex vs. multiplex assays

HeLa cells were transfected with mCh\_mRNA<sup>WT</sup> and incubated for 24 h. Then, cells were lysed and total cellular RNA was isolated. Total RNA isolation was accomplished using the NucleoSpin<sup>®</sup> RNA Kit (Macherey-Nagel) according to the manufacturer's protocol.

RT-qPCR reactions were performed applying the GoTaq<sup>®</sup> Probe 2 step RT-qPCR System (Promega). First, denaturing of RNA templates and primers was performed in a 7  $\mu$ L scale with 100 ng of isolated cellular total RNA, 0.5  $\mu$ g Oligo(dT)<sub>15</sub> primer and 0.5  $\mu$ g random primers. RNA/primer mixes were pipetted on ice, then incubated at 70 °C for 5 min and subsequently chilled in an ice-water bath for at least 5 min. According to the manufacturers' protocol, master mixes for reverse transcription (RT) and no-reverse transcriptase (NRT) controls were prepared on ice with a total volume of 13  $\mu$ L per each reaction. 13  $\mu$ L each of RT or NRT master mix were added to 7  $\mu$ L each of RNA/primer mixes for a final reaction volume of 20  $\mu$ L containing GoScript<sup>™</sup> Reaction Buffer (unlisted concentrations of GoTaq<sup>®</sup> Probe 2 step RT-qPCR System component), 2 mM MgCl<sub>2</sub>, 500  $\mu$ M PCR nucleotide mix, 50 U recombinant RNasin ribonuclease inhibitor and GoScript<sup>™</sup> reverse transcriptase (unlisted concentration of GoTaq<sup>®</sup> Probe 2 step RT-qPCR System component) for RT or compensational amount of ddH<sub>2</sub>O for NRT controls, respectively. RT and NRT reaction mixes were incubated at 25 °C for 5 min to hybridize RNA and primers, followed by 42 °C for 45 min for implementation of reverse transcription and subsequent enzyme inactivation at 70 °C for 15 min. For usage in qPCR, the reverse transcribed cDNA samples and NRT control reactions were diluted 1:2 with ddH<sub>2</sub>O. Five or six different concentrations of two-fold serial dilutions of cDNA or NRT control were then taken for qPCR reactions. According to the manufacturer's protocol, qPCR master mixes were prepared on ice and added to diluted cDNA or NRT control, respectively. Each qPCR reaction was complemented in a total volume of 20  $\mu$ L containing GoTaq<sup>®</sup> Probe qPCR master mix (unlisted concentration of GoTaq<sup>®</sup> Probe 2 step RT-qPCR System component), 200 nM forward primers, 200 nM reverse primers and 300 nM hydrolysis probe. For mCh\_qPCR<sup>internal</sup> singleplex qPCR reactions only mCh\_qPCR<sup>internal</sup>\_FW forward primer, 200 nM mCh\_qPCR<sup>internal</sup>\_RV reverse primer

and 300 nM mCh\_qPCR<sup>internal</sup>\_probe as for mCh\_qPCR<sup>3'-end</sup> singleplex qPCR reactions only 200 nM mCh\_qPCR<sup>3'-end</sup>\_FW forward primer, 200 nM mCh\_qPCR<sup>3'-end</sup>\_RV reverse primer and 300 nM mCh\_qPCR<sup>3'-end</sup>\_probe as for GAPDH\_qPCR singleplex qPCR reactions only 200 nM GAPDH\_qPCR\_FW forward primer, 200 nM GAPDH\_qPCR\_RV reverse primer and 300 nM GAPDH\_qPCR\_probe as for  $\beta$ -Actin singleplex qPCR reactions only 200 nM  $\beta$ -Actin\_qPCR\_FW forward primer, 200 nM  $\beta$ -Actin\_qPCR\_RV reverse primer and 300 nM  $\beta$ -Actin\_qPCR\_probe were used, respectively. For multiplex reactions a combination thereof was used. qPCR master mix and cDNA or NRT dilutions, respectively, were pipetted into 96-well PCR plates (Hard-Shell® 96-Well PCR Plates, low profile, thin wall, skirted, white/white, Bio-Rad) on ice. The qPCR plate was sealed with adhesive foil (Microseal 'B' PCR Plate Sealing Film, adhesive, optical, Bio-Rad), briefly centrifuged and placed into the qPCR thermal cycler (CFX96 Touch Real-Time PCR Detection System, Bio-Rad). qPCR cycling was performed with an initial denaturing step at 95 °C for 2 min, followed by 40 cycles of denaturing at 95 °C for 15 s and a combined step for annealing and elongation at 60 °C for 1 min. All qPCR reactions were performed as technical triplets. C<sub>t</sub> values for each target gene were calculated by the CFX Maestro software (Bio-Rad). C<sub>t</sub> mean values and standard deviation (s.d.) of technical duplicate samples were calculated. C<sub>t</sub> mean values were plotted against the logarithm of diluted cDNA concentrations. Lines of best fit were computed with Excel (Microsoft Office) and qPCR efficiencies were calculated as  $(10^{-1/\text{slope}-1}) * 100$ .

| singleplex mCh_qPCR <sup>3'-end</sup> |                         |                 |                 |               |       |
|---------------------------------------|-------------------------|-----------------|-----------------|---------------|-------|
| V <sub>CDNA</sub> [μL]                | log(V <sub>CDNA</sub> ) | Ct Duplicate #1 | Ct Duplicate #2 | Ct mean value | S.D.  |
| 0.156                                 | -0.807                  | 24.40           | 24.32           | 24.36         | 0.04  |
| 0.313                                 | -0.504                  | 23.17           | 23.19           | 23.18         | 0.01  |
| 0.625                                 | -0.204                  | 22.10           | 22.01           | 22.06         | 0.045 |
| 1.25                                  | 0.097                   | 20.93           | 20.98           | 20.96         | 0.025 |
| 2.5                                   | 0.398                   | 19.88           | 19.86           | 19.87         | 0.01  |
| 5                                     | 0.699                   | 18.73           | 19.10           | 18.92         | 0.185 |

| Ctrls | Ct  |
|-------|-----|
| NRT   | 0.0 |
| NTC   | 0.0 |

| multiplex mCh_qPCR <sup>3'-end</sup> together w/ $\beta$ -Actin_qPCR + GAPDH_qPCR |                         |                 |                 |               |       |
|-----------------------------------------------------------------------------------|-------------------------|-----------------|-----------------|---------------|-------|
| V <sub>CDNA</sub> [μL]                                                            | log(V <sub>CDNA</sub> ) | Ct Duplicate #1 | Ct Duplicate #2 | Ct mean value | S.D.  |
| 0.156                                                                             | -0.807                  | 24.16           | 24.07           | 24.12         | 0.045 |
| 0.313                                                                             | -0.504                  | 23.10           | 22.94           | 23.02         | 0.08  |
| 0.625                                                                             | -0.204                  | 22.03           | 21.92           | 21.98         | 0.055 |
| 1.25                                                                              | 0.097                   | 21.01           | 20.97           | 20.99         | 0.02  |
| 2.5                                                                               | 0.398                   | 20.08           | 19.95           | 20.02         | 0.065 |
| 5                                                                                 | 0.699                   | 18.99           | 18.92           | 18.96         | 0.035 |

| Ctrls | Ct  |
|-------|-----|
| NRT   | 0.0 |
| NTC   | 0.0 |

| Multiplex mCh_qPCR <sup>3'-end</sup> together w/ mCh_qPCR <sup>internal</sup> + $\beta$ -Actin_qPCR + GAPDH_qPCR |                         |                 |                 |               |       |
|------------------------------------------------------------------------------------------------------------------|-------------------------|-----------------|-----------------|---------------|-------|
| V <sub>cdNA</sub> [ $\mu$ L]                                                                                     | log(V <sub>cdNA</sub> ) | Ct Duplicate #1 | Ct Duplicate #2 | Ct mean value | S.D.  |
| 0.156                                                                                                            | -0.807                  | 24.10           | 24.04           | 24.07         | 0.03  |
| 0.313                                                                                                            | -0.504                  | 23.05           | 23.08           | 23.07         | 0.015 |
| 0.625                                                                                                            | -0.204                  | 22.00           | 21.98           | 21.99         | 0.01  |
| 1.25                                                                                                             | 0.097                   | 20.96           | 20.95           | 20.96         | 0.005 |
| 2.5                                                                                                              | 0.398                   | 20.01           | 20.02           | 20.02         | 0.005 |
| 5                                                                                                                | 0.699                   | 24.10           | 24.04           | 24.07         | 0.03  |

| Ctrls | Ct  |
|-------|-----|
| NRT   | 0.0 |
| NTC   | 0.0 |

| singleplex mCh_qPCR <sup>internal</sup> |                         |                 |                 |               |       |
|-----------------------------------------|-------------------------|-----------------|-----------------|---------------|-------|
| V <sub>cdNA</sub> [ $\mu$ L]            | log(V <sub>cdNA</sub> ) | Ct Duplicate #1 | Ct Duplicate #2 | Ct mean value | S.D.  |
| 0.156                                   | -0.807                  | 24.62           | 24.73           | 24.68         | 0.055 |
| 0.313                                   | -0.504                  | 23.44           | 23.51           | 23.48         | 0.035 |
| 0.625                                   | -0.204                  | 21.71           | 22.26           | 21.99         | 0.275 |
| 1.25                                    | 0.097                   | 21.21           | 21.19           | 21.20         | 0.01  |
| 2.5                                     | 0.398                   | 20.12           | 20.15           | 20.14         | 0.015 |
| 5                                       | 0.699                   | 19.05           | 19.09           | 19.07         | 0.02  |

| Ctrls | Ct  |
|-------|-----|
| NRT   | 0.0 |
| NTC   | 0.0 |

| multiplex mCh_qPCR <sup>internal</sup> together w/ $\beta$ -Actin_qPCR + GAPDH_qPCR |                         |                 |                 |               |       |
|-------------------------------------------------------------------------------------|-------------------------|-----------------|-----------------|---------------|-------|
| V <sub>cdNA</sub> [ $\mu$ L]                                                        | log(V <sub>cdNA</sub> ) | Ct Duplicate #1 | Ct Duplicate #2 | Ct mean value | S.D.  |
| 0.156                                                                               | -0.807                  | 25.43           | 25.48           | 25.46         | 0.025 |
| 0.313                                                                               | -0.504                  | 24.18           | 24.09           | 24.14         | 0.045 |
| 0.625                                                                               | -0.204                  | 23.05           | 23.06           | 23.06         | 0.005 |
| 1.25                                                                                | 0.097                   | 21.98           | 21.93           | 21.96         | 0.025 |
| 2.5                                                                                 | 0.398                   | 21.05           | 20.89           | 20.97         | 0.08  |
| 5                                                                                   | 0.699                   | 20.20           | 19.85           | 20.03         | 0.175 |

| Ctrls | Ct |
|-------|----|
|-------|----|

|     |     |
|-----|-----|
| NRT | 0.0 |
| NTC | 0.0 |

| multiplex mCh_qPCR <sup>internal</sup> together w/ mCh_qPCR <sup>internal</sup> + $\beta$ -Actin_qPCR + GAPDH_qPCR |                         |                 |                 |               |       |
|--------------------------------------------------------------------------------------------------------------------|-------------------------|-----------------|-----------------|---------------|-------|
| V <sub>CDNA</sub> [ $\mu$ L]                                                                                       | log(V <sub>CDNA</sub> ) | Ct Duplicate #1 | Ct Duplicate #2 | Ct mean value | S.D.  |
| 0.156                                                                                                              | -0.807                  | 24.97           | 25.00           | 24.99         | 0.015 |
| 0.313                                                                                                              | -0.504                  | 23.76           | 23.79           | 23.78         | 0.015 |
| 0.625                                                                                                              | -0.204                  | 22.64           | 22.64           | 22.64         | 0     |
| 1.25                                                                                                               | 0.097                   | 21.59           | 21.58           | 21.59         | 0.005 |
| 2.5                                                                                                                | 0.398                   | 20.54           | 20.53           | 20.54         | 0.005 |
| 5                                                                                                                  | 0.699                   | 24.97           | 25.00           | 24.99         | 0.015 |

| Ctrls | Ct  |
|-------|-----|
| NRT   | 0.0 |
| NTC   | 0.0 |

| singleplex $\beta$ -Actin_qPCR |                         |                 |                 |               |       |
|--------------------------------|-------------------------|-----------------|-----------------|---------------|-------|
| V <sub>CDNA</sub> [ $\mu$ L]   | log(V <sub>CDNA</sub> ) | Ct Duplicate #1 | Ct Duplicate #2 | Ct mean value | S.D.  |
| 0.156                          | -0.807                  | 24.27           | 24.19           | 24.23         | 0.04  |
| 0.313                          | -0.504                  | 23.17           | 23.07           | 23.12         | 0.05  |
| 0.625                          | -0.204                  | 21.98           | 21.91           | 21.95         | 0.035 |
| 1.25                           | 0.097                   | 20.87           | 20.85           | 20.86         | 0.01  |
| 2.5                            | 0.398                   | 19.73           | 19.47           | 19.60         | 0.13  |
| 5                              | 0.699                   | 18.68           | 18.46           | 18.57         | 0.11  |

| Ctrls | Ct  |
|-------|-----|
| NRT   | 0.0 |
| NTC   | 0.0 |

| multiplex $\beta$ -Actin_qPCR together w/ mCh_qPCR <sup>3'-end</sup> + mCh_qPCR <sup>internal</sup> + GAPDH_qPCR |                         |                 |                 |               |       |
|------------------------------------------------------------------------------------------------------------------|-------------------------|-----------------|-----------------|---------------|-------|
| V <sub>CDNA</sub> [ $\mu$ L]                                                                                     | log(V <sub>CDNA</sub> ) | Ct Duplicate #1 | Ct Duplicate #2 | Ct mean value | S.D.  |
| 0.156                                                                                                            | -0.807                  | 23.37           | 23.29           | 23.33         | 0.04  |
| 0.313                                                                                                            | -0.504                  | 22.28           | 22.54           | 22.41         | 0.13  |
| 0.625                                                                                                            | -0.204                  | 21.62           | 21.60           | 21.61         | 0.01  |
| 1.25                                                                                                             | 0.097                   | 20.58           | 19.42           | 20.00         | 0.58  |
| 2.5                                                                                                              | 0.398                   | 19.54           | 19.55           | 19.55         | 0.005 |
| 5                                                                                                                | 0.699                   | 23.37           | 23.29           | 23.33         | 0.04  |

| Ctrls | Ct  |
|-------|-----|
| NRT   | 0.0 |

|     |     |
|-----|-----|
| NTC | 0.0 |
|-----|-----|

| singleplex GAPDH_qPCR  |                         |                 |                 |               |       |
|------------------------|-------------------------|-----------------|-----------------|---------------|-------|
| V <sub>CDNA</sub> [μL] | log(V <sub>CDNA</sub> ) | Ct Duplicate #1 | Ct Duplicate #2 | Ct mean value | S.D.  |
| 0.156                  | -0.807                  | 25.14           | 25.20           | 25.17         | 0.03  |
| 0.313                  | -0.504                  | 24.05           | 24.06           | 24.06         | 0.005 |
| 0.625                  | -0.204                  | 22.83           | 23.21           | 23.02         | 0.19  |
| 1.25                   | 0.097                   | 21.82           | 21.78           | 21.80         | 0.02  |
| 2.5                    | 0.398                   | 20.78           | 20.82           | 20.80         | 0.02  |
| 5                      | 0.699                   | 19.72           | 19.87           | 19.80         | 0.075 |

| Ctrls | Ct  |
|-------|-----|
| NRT   | 0.0 |
| NTC   | 0.0 |

| multiplex GAPDH_qPCR together w/ mCh_qPCR <sup>3'-end</sup> + mCh_qPCR <sup>internal</sup> + β-Actin_qPCR |                         |                 |                 |               |       |
|-----------------------------------------------------------------------------------------------------------|-------------------------|-----------------|-----------------|---------------|-------|
| V <sub>CDNA</sub> [μL]                                                                                    | log(V <sub>CDNA</sub> ) | Ct Duplicate #1 | Ct Duplicate #2 | Ct mean value | S.D.  |
| 0.156                                                                                                     | -0.807                  | 24.54           | 24.58           | 24.56         | 0.02  |
| 0.313                                                                                                     | -0.504                  | 23.51           | 23.56           | 23.54         | 0.025 |
| 0.625                                                                                                     | -0.204                  | 22.50           | 22.49           | 22.50         | 0.005 |
| 1.25                                                                                                      | 0.097                   | 21.54           | 21.48           | 21.51         | 0.03  |
| 2.5                                                                                                       | 0.398                   | 20.52           | 20.45           | 20.49         | 0.035 |
| 5                                                                                                         | 0.699                   | 24.54           | 24.58           | 24.56         | 0.02  |

| Ctrls | Ct  |
|-------|-----|
| NRT   | 0.0 |
| NTC   | 0.0 |

| qPCR target                  |                                                                                        | qPCR efficiency [%] |
|------------------------------|----------------------------------------------------------------------------------------|---------------------|
| mCh_qPCR <sup>3'-end</sup>   | singleplex                                                                             | 88.56               |
|                              | multiplex (+β-Actin_qPCR +GAPDH_qPCR)                                                  | 96.94               |
|                              | multiplex (+ mCh_qPCR <sup>internal</sup> + β-Actin_qPCR + GAPDH_qPCR)                 | 97.07               |
| mCh_qPCR <sup>internal</sup> | singleplex                                                                             | 86.8                |
|                              | multiplex (+β-Actin_qPCR +GAPDH_qPCR)                                                  | 90.18               |
|                              | multiplex (+ mCh_qPCR <sup>3'-end</sup> + β-Actin_qPCR + GAPDH_qPCR)                   | 86.85               |
| β-Actin_qPCR                 | singleplex                                                                             | 83.57               |
|                              | multiplex (+ mCh_qPCR <sup>3'-end</sup> + mCh_qPCR <sup>internal</sup> + GAPDH_qPCR)   | 100.31              |
| GAPDH_qPCR                   | singleplex                                                                             | 89.81               |
|                              | multiplex (+ mCh_qPCR <sup>3'-end</sup> + mCh_qPCR <sup>internal</sup> + β-Actin_qPCR) | 97.66               |

## mCherry protein quantification

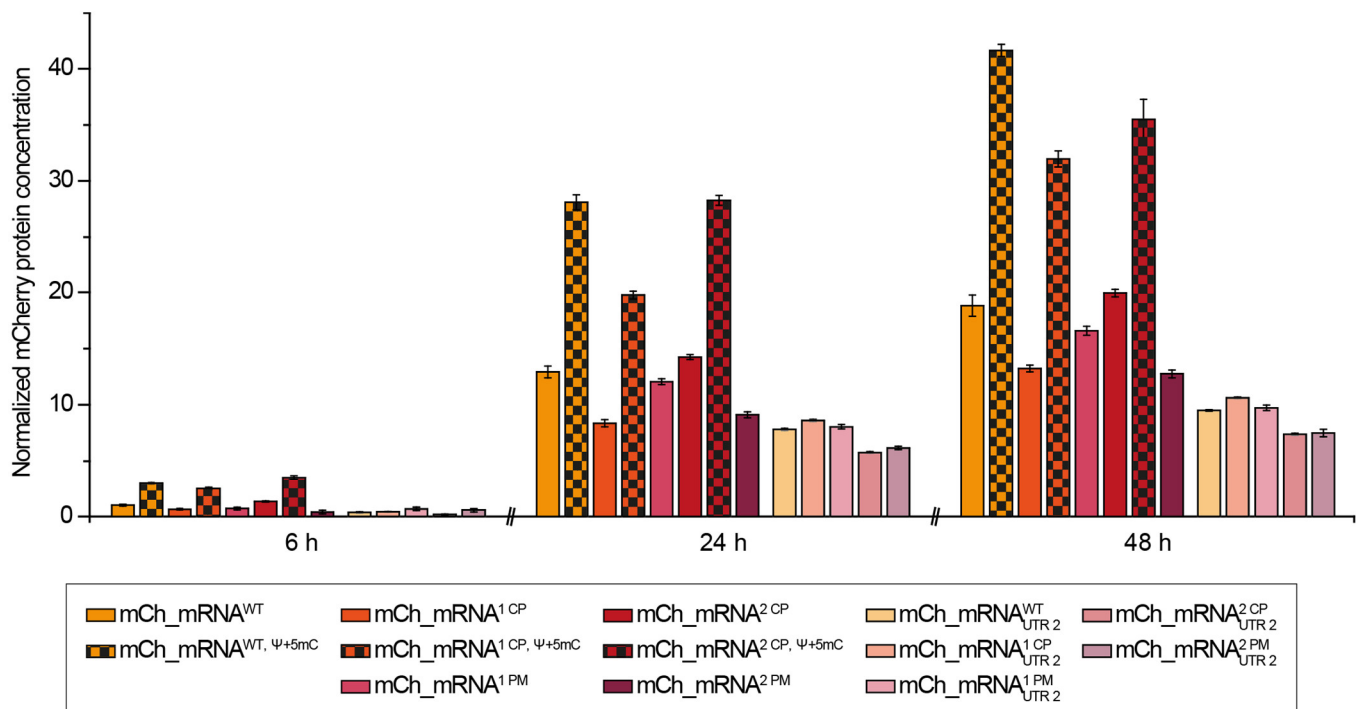

**Supplementary Figure 30.** mCherry protein quantification of mCh\_mRNA and mCh\_mRNA<sub>UTR 2</sub> sequences. Subsets are shown in Figure 4 of the main text.

## Raw data of fluorescence (RFU) and mCherry protein standard curves for quantification

### mCh\_mRNA + mCh\_mRNA<sub>UTR 2</sub>

Exp. #1

|                                     | WT #1 | WT #2 | 1 CP #1 | 1 CP #2 | 2 CP #1 | 2 CP #2 | 1 PM #1 | 1 PM #2 | 2 PM #1 | 2 PM #2 | H <sub>2</sub> O Transf. Ctrl. #1 | H <sub>2</sub> O Transf. Ctrl. #2 | Untr. Cells Ctrl. #1 | Untr. Cells Ctrl. #2 |
|-------------------------------------|-------|-------|---------|---------|---------|---------|---------|---------|---------|---------|-----------------------------------|-----------------------------------|----------------------|----------------------|
| 6 h mCh_mRNA                        | 72    | 57    | 0       | 120     | 96      | 90      | 95      | 0       | 82      | 2       |                                   |                                   |                      |                      |
| 6 h mCh_mRNA <sub>UTR2</sub>        | 80    | 94    | 74      | 74      | 77      | 0       | 74      | 135     | 47      | 74      |                                   |                                   |                      |                      |
| 6 h H <sub>2</sub> O Transf. Ctrl.  |       |       |         |         |         |         |         |         |         |         | 41                                | 78                                |                      |                      |
| 6 h Untr. Cells Ctrl.               |       |       |         |         |         |         |         |         |         |         |                                   |                                   | 16                   | 66                   |
| 24 h mCh_mRNA                       | 416   | 365   | 227     | 364     | 391     | 501     | 426     | 460     | 397     | 351     |                                   |                                   |                      |                      |
| 24 h mCh_mRNA <sub>UTR2</sub>       | 351   | 211   | 319     | 376     | 250     | 270     | 372     | 314     | 321     | 245     |                                   |                                   |                      |                      |
| 24 h H <sub>2</sub> O Transf. Ctrl. |       |       |         |         |         |         |         |         |         |         | 51                                | 0                                 |                      |                      |
| 24 h Untr. Cells Ctrl.              |       |       |         |         |         |         |         |         |         |         |                                   |                                   | 2                    | 43                   |
| 48 h mCh_mRNA                       | 561   | 608   | 196     | 509     | 576     | 645     | 583     | 564     | 402     | 553     |                                   |                                   |                      |                      |
| 48 h mCh_mRNA <sub>UTR2</sub>       | 355   | 331   | 444     | 511     | 464     | 378     | 443     | 467     | 427     | 347     |                                   |                                   |                      |                      |
| 48 h H <sub>2</sub> O Transf. Ctrl. |       |       |         |         |         |         |         |         |         |         | 83                                | 25                                |                      |                      |
| 48 h Untr. Cells Ctrl.              |       |       |         |         |         |         |         |         |         |         |                                   |                                   | 55                   | 29                   |



| mCherry protein standard [ng/well] | 0  | 20  | 40  | 60  | 80  | 100 |
|------------------------------------|----|-----|-----|-----|-----|-----|
| Standard curve                     | 60 | 119 | 208 | 396 | 587 | 620 |
| Standard curve #2                  | 80 | 82  | 331 | 148 | 499 | 544 |

|                                             |       |
|---------------------------------------------|-------|
| Background (mean value for 0 ng/well)       | 70    |
| Slope line of best fit                      | 6.52  |
| Coefficient of determination R <sup>2</sup> | 0.988 |

Exp. #2

|                                     | WT #1 | WT #2 | 1 CP #1 | 1 CP #2 | 2 CP #1 | 2 CP #2 | 1 PM #1 | 1 PM #2 | 2 PM #1 | 2 PM #2 | H <sub>2</sub> O Transf. Ctrl. #1 | H <sub>2</sub> O Transf. Ctrl. #2 | Untr. Cells Ctrl. #1 |
|-------------------------------------|-------|-------|---------|---------|---------|---------|---------|---------|---------|---------|-----------------------------------|-----------------------------------|----------------------|
| 6 h mCh_mRNA                        | 5     | 25    | 0       | 0       | 5       | 0       | 0       | 30      | 35      | 0       |                                   |                                   |                      |
| 6 h mCh_mRNA <sub>UTR2</sub>        | 46    | 0     | 32      | 16      | 0       | 0       | 15      | 76      | 42      | 41      |                                   |                                   |                      |
| 6 h H <sub>2</sub> O Transf. Ctrl.  |       |       |         |         |         |         |         |         |         |         | 0                                 | 0                                 |                      |
| 6 h Untr. Cells Ctrl.               |       |       |         |         |         |         |         |         |         |         |                                   |                                   | 0                    |
| 24 h mCh_mRNA                       | 300   | 398   | 137     | 260     | 336     | 349     | 336     | 313     | 251     | 246     |                                   |                                   |                      |
| 24 h mCh_mRNA <sub>UTR2</sub>       | 270   | 187   | 276     | 259     | 171     | 192     | 195     | 256     | 204     | 258     |                                   |                                   |                      |
| 24 h H <sub>2</sub> O Transf. Ctrl. |       |       |         |         |         |         |         |         |         |         | 0                                 | 0                                 |                      |
| 24 h Untr. Cells Ctrl.              |       |       |         |         |         |         |         |         |         |         |                                   |                                   | 0                    |
| 48 h mCh_mRNA                       | 516   | 470   | 285     | 292     | 506     | 529     | 310     | 511     | 350     | 394     |                                   |                                   |                      |
| 48 h mCh_mRNA <sub>UTR2</sub>       | 347   | 343   | 381     | 398     | 200     | 250     | 384     | 361     | 348     | 145     |                                   |                                   |                      |
| 48 h H <sub>2</sub> O Transf. Ctrl. |       |       |         |         |         |         |         |         |         |         | 5                                 | 0                                 |                      |
| 48 h Untr. Cells Ctrl.              |       |       |         |         |         |         |         |         |         |         |                                   |                                   | 26                   |

| mCherry protein standard [ng/well] | 0 | 20  | 40  | 60  | 80  | 100 |
|------------------------------------|---|-----|-----|-----|-----|-----|
| Standard curve #1                  | 0 | 118 | 94  | 214 | 306 | 317 |
| Standard curve #2                  | 0 | 33  | 145 | 198 | 318 | 429 |

|                                             |       |
|---------------------------------------------|-------|
| Background (mean value for 0 ng/well)       | 0     |
| Slope line of best fit                      | 3.68  |
| Coefficient of determination R <sup>2</sup> | 0.996 |

Exp. #3

|                                     | WT #1 | WT #2 | 1 CP #1 | 1 CP #2 | 2 CP #1 | 2 CP #2 | 1 PM #1 | 1 PM #2 | 2 PM #1 | 2 PM #2 | H <sub>2</sub> O Transf. Ctrl. #1 | H <sub>2</sub> O Transf. Ctrl. #2 | Untr. Cells Ctrl. #1 | Untr. Cells Ctrl. #2 |
|-------------------------------------|-------|-------|---------|---------|---------|---------|---------|---------|---------|---------|-----------------------------------|-----------------------------------|----------------------|----------------------|
| 6 h mCh_mRNA                        | 132   | 115   | 63      | 1       | 124     | 147     | 137     | 71      | 23      | 52      |                                   |                                   |                      |                      |
| 6 h mCh_mRNA <sub>UTR2</sub>        | 77    | 88    | 12      | 38      | 51      | 55      | 40      | 91      | 47      | 36      |                                   |                                   |                      |                      |
| 6 h H <sub>2</sub> O Transf. Ctrl.  |       |       |         |         |         |         |         |         |         |         | 73                                | 28                                |                      |                      |
| 6 h Untr. Cells Ctrl.               |       |       |         |         |         |         |         |         |         |         |                                   |                                   | 2                    | 69                   |
| 24 h mCh_mRNA                       | 872   | 830   | 236     | 374     | 543     | 577     | 635     | 741     | 505     | 605     |                                   |                                   |                      |                      |
| 24 h mCh_mRNA <sub>UTR2</sub>       | 439   | 326   | 304     | 462     | 221     | 296     | 377     | 466     | 330     | 336     |                                   |                                   |                      |                      |
| 24 h H <sub>2</sub> O Transf. Ctrl. |       |       |         |         |         |         |         |         |         |         | 4                                 | 15                                |                      |                      |

|                                     |      |      |     |     |     |     |     |      |     |     |    |    |   |    |    |
|-------------------------------------|------|------|-----|-----|-----|-----|-----|------|-----|-----|----|----|---|----|----|
| 24 h Untr. Cells Ctrl.              |      |      |     |     |     |     |     |      |     |     |    |    |   | 45 | 39 |
| 48 h mCh_mRNA                       | 1050 | 1193 | 331 | 512 | 608 | 787 | 957 | 1141 | 698 | 827 |    |    |   |    |    |
| 48 h mCh_mRNA <sub>UTR2</sub>       | 493  | 490  | 447 | 472 | 379 | 485 | 437 | 528  | 473 | 411 |    |    |   |    |    |
| 48 h H <sub>2</sub> O Transf. Ctrl. |      |      |     |     |     |     |     |      |     |     | 27 | 32 |   |    |    |
| 48 h Untr. Cells Ctrl.              |      |      |     |     |     |     |     |      |     |     |    |    | 1 | 54 |    |

|                                    |    |     |     |     |     |     |
|------------------------------------|----|-----|-----|-----|-----|-----|
| mCherry protein standard [ng/well] | 0  | 20  | 40  | 60  | 80  | 100 |
| Standard curve #1                  | 38 | 136 | 170 | 256 | 424 | 432 |
| Standard curve #2                  | 43 | 95  | 192 | 336 | 346 | 430 |

|                                             |       |
|---------------------------------------------|-------|
| Background (mean value for 0 ng/well)       | 40.5  |
| Slope line of best fit                      | 4.60  |
| Coefficient of determination R <sup>2</sup> | 0.992 |

Exp. #4

|                                     | WT #1 | WT #2 | 1 CP #1 | 1 CP #2 | 2 CP #1 | 2 CP #2 | 1 PM #1 | 1 PM #2 | 2 PM #1 | 2 PM #2 | H <sub>2</sub> O Transf. Ctrl. #1 | H <sub>2</sub> O Transf. Ctrl. #2 | Untr. Cells Ctrl. #1 | Untr. Cells Ctrl. #2 |
|-------------------------------------|-------|-------|---------|---------|---------|---------|---------|---------|---------|---------|-----------------------------------|-----------------------------------|----------------------|----------------------|
| 6 h mCh_mRNA                        | 89    | 65    | 0       | 69      | 104     | 157     | 93      | 82      | 26      | 60      |                                   |                                   |                      |                      |
| 6 h mCh_mRNA <sub>UTR2</sub>        | 31    | 75    | 52      | 59      | 17      | 56      | 101     | 78      | 53      | 90      |                                   |                                   |                      |                      |
| 6 h H <sub>2</sub> O Transf. Ctrl.  |       |       |         |         |         |         |         |         |         |         | 60                                | 9                                 |                      |                      |
| 6 h Untr. Cells Ctrl.               |       |       |         |         |         |         |         |         |         |         |                                   |                                   | 0                    | 44                   |
| 24 h mCh_mRNA                       | 985   | 1075  | 323     | 509     | 761     | 869     | 967     | 996     | 656     | 718     |                                   |                                   |                      |                      |
| 24 h mCh_mRNA <sub>UTR2</sub>       | 607   | 537   | 438     | 543     | 363     | 436     | 515     | 560     | 406     | 486     |                                   |                                   |                      |                      |
| 24 h H <sub>2</sub> O Transf. Ctrl. |       |       |         |         |         |         |         |         |         |         | 59                                | 8                                 |                      |                      |
| 24 h Untr. Cells Ctrl.              |       |       |         |         |         |         |         |         |         |         |                                   |                                   | 34                   | 39                   |
| 48 h mCh_mRNA                       | 1561  | 1424  | 492     | 592     | 1204    | 1259    | 1335    | 1480    | 1047    | 1170    |                                   |                                   |                      |                      |
| 48 h mCh_mRNA <sub>UTR2</sub>       | 851   | 776   | 600     | 671     | 599     | 547     | 817     | 700     | 563     | 613     |                                   |                                   |                      |                      |
| 48 h H <sub>2</sub> O Transf. Ctrl. |       |       |         |         |         |         |         |         |         |         | 43                                | 17                                |                      |                      |
| 48 h Untr. Cells Ctrl.              |       |       |         |         |         |         |         |         |         |         |                                   |                                   | 76                   | 10                   |

|                                    |    |     |     |     |     |     |
|------------------------------------|----|-----|-----|-----|-----|-----|
| mCherry protein standard [ng/well] | 0  | 20  | 40  | 60  | 80  | 100 |
| Standard curve #1                  | 49 | 122 | 266 | 282 | 289 | 548 |
| Standard curve #2                  | 50 | 102 | 301 | 304 | 393 | 413 |

|                                             |       |
|---------------------------------------------|-------|
| Background (mean value for 0 ng/well)       | 49.5  |
| Slope line of best fit                      | 4.84  |
| Coefficient of determination R <sup>2</sup> | 0.976 |

Exp. #5

|              | WT #1 | WT #2 | 1 CP #1 | 1 CP #2 | 2 CP #1 | 2 CP #2 | 1 PM #1 | 1 PM #2 | 2 PM #1 | 2 PM #2 | H <sub>2</sub> O Transf. Ctrl. #1 | H <sub>2</sub> O Transf. Ctrl. #2 | Untr. Cells Ctrl. #1 | Untr. Cells Ctrl. #2 |
|--------------|-------|-------|---------|---------|---------|---------|---------|---------|---------|---------|-----------------------------------|-----------------------------------|----------------------|----------------------|
| 6 h mCh_mRNA | 42    | 125   | 19      | 13      | 92      | 103     | 8       | 36      | 94      | 98      |                                   |                                   |                      |                      |

|                                     |      |      |     |     |      |      |      |      |     |     |    |   |   |   |
|-------------------------------------|------|------|-----|-----|------|------|------|------|-----|-----|----|---|---|---|
| 6 h mCh_mRNA <sub>UTR2</sub>        | 13   | 0    | 21  | 41  | 0    | 0    | 26   | 89   | 43  | 42  |    |   |   |   |
| 6 h H <sub>2</sub> O Transf. Ctrl.  |      |      |     |     |      |      |      |      |     |     | 0  | 0 |   |   |
| 6 h Untr. Cells Ctrl.               |      |      |     |     |      |      |      |      |     |     |    |   | 0 | 0 |
| 24 h mCh_mRNA                       | 694  | 670  | 117 | 390 | 833  | 683  | 659  | 782  | 582 | 574 |    |   |   |   |
| 24 h mCh_mRNA <sub>UTR2</sub>       | 487  | 407  | 396 | 332 | 173  | 316  | 381  | 471  | 329 | 332 |    |   |   |   |
| 24 h H <sub>2</sub> O Transf. Ctrl. |      |      |     |     |      |      |      |      |     |     | 1  | 0 |   |   |
| 24 h Untr. Cells Ctrl.              |      |      |     |     |      |      |      |      |     |     |    |   | 0 | 0 |
| 48 h mCh_mRNA                       | 1194 | 1031 | 373 | 606 | 1219 | 1024 | 1234 | 1205 | 806 | 991 |    |   |   |   |
| 48 h mCh_mRNA <sub>UTR2</sub>       | 610  | 566  | 597 | 570 | 390  | 321  | 635  | 653  | 526 | 480 |    |   |   |   |
| 48 h H <sub>2</sub> O Transf. Ctrl. |      |      |     |     |      |      |      |      |     |     | 15 | 0 |   |   |
| 48 h Untr. Cells Ctrl.              |      |      |     |     |      |      |      |      |     |     |    |   | 0 | 7 |

|                                    |    |     |     |     |     |     |
|------------------------------------|----|-----|-----|-----|-----|-----|
| mCherry protein standard [ng/well] | 0  | 20  | 40  | 60  | 80  | 100 |
| Standard curve #1                  | 10 | 104 | 263 | 367 | 523 | 616 |
| Standard curve #2                  | 13 | 135 | 241 | 389 | 480 | 653 |

|                                             |      |
|---------------------------------------------|------|
| Background (mean value for 0 ng/well)       | 11.5 |
| Slope line of best fit                      | 6.31 |
| Coefficient of determination R <sup>2</sup> | 1    |

Exp. #6

|                                     | WT #1 | WT #2 | 1 CP #1 | 1 CP #2 | 2 CP #1 | 2 CP #2 | 1 PM #1 | 1 PM #2 | 2 PM #1 | 2 PM #2 | H <sub>2</sub> O Transf. Ctrl. #1 | H <sub>2</sub> O Transf. Ctrl. #2 | Untr. Cells Ctrl. #1 | Untr. Cells Ctrl. #2 |
|-------------------------------------|-------|-------|---------|---------|---------|---------|---------|---------|---------|---------|-----------------------------------|-----------------------------------|----------------------|----------------------|
| 6 h mCh_mRNA                        | 91    | 106   | 55      | 22      | 180     | 155     | 116     | 92      | 102     | 1       |                                   |                                   |                      |                      |
| 6 h mCh_mRNA <sub>UTR2</sub>        | 52    | 46    | 49      | 67      | 57      | 31      | 52      | 38      | 54      | 34      |                                   |                                   |                      |                      |
| 6 h H <sub>2</sub> O Transf. Ctrl.  |       |       |         |         |         |         |         |         |         |         | 63                                | 0                                 |                      |                      |
| 6 h Untr. Cells Ctrl.               |       |       |         |         |         |         |         |         |         |         |                                   |                                   | 37                   | 0                    |
| 24 h mCh_mRNA                       | 717   | 647   | 226     | 371     | 750     | 975     | 696     | 742     | 463     | 614     |                                   |                                   |                      |                      |
| 24 h mCh_mRNA <sub>UTR2</sub>       | 409   | 383   | 424     | 388     | 256     | 322     | 457     | 462     | 331     | 299     |                                   |                                   |                      |                      |
| 24 h H <sub>2</sub> O Transf. Ctrl. |       |       |         |         |         |         |         |         |         |         | 43                                | 0                                 |                      |                      |
| 24 h Untr. Cells Ctrl.              |       |       |         |         |         |         |         |         |         |         |                                   |                                   | 45                   | 9                    |
| 48 h mCh_mRNA                       | 1072  | 833   | 279     | 520     | 1138    | 1243    | 1162    | 1196    | 799     | 866     |                                   |                                   |                      |                      |
| 48 h mCh_mRNA <sub>UTR2</sub>       | 610   | 543   | 555     | 551     | 369     | 318     | 543     | 615     | 484     | 502     |                                   |                                   |                      |                      |
| 48 h H <sub>2</sub> O Transf. Ctrl. |       |       |         |         |         |         |         |         |         |         | 62                                | 4                                 |                      |                      |
| 48 h Untr. Cells Ctrl.              |       |       |         |         |         |         |         |         |         |         |                                   |                                   | 37                   | 13                   |

|                                    |   |     |     |     |     |     |
|------------------------------------|---|-----|-----|-----|-----|-----|
| mCherry protein standard [ng/well] | 0 | 20  | 40  | 60  | 80  | 100 |
| Standard curve #1                  | 4 | 106 | 202 | 304 | 435 | 507 |
| Standard curve #2                  | 0 | 154 | 222 | 387 | 394 | 564 |

|                                       |      |
|---------------------------------------|------|
| Background (mean value for 0 ng/well) | 2    |
| Slope line of best fit                | 5.18 |

|                                             |       |
|---------------------------------------------|-------|
| Coefficient of determination R <sup>2</sup> | 0.999 |
|---------------------------------------------|-------|

Exp. #7

|                                     | WT #1 | WT #2 | 1 CP #1 | 1 CP #2 | 2 CP #1 | 2 CP #2 | 1 PM #1 | 1 PM #2 | 2 PM #1 | 2 PM #2 | H <sub>2</sub> O Transf. Ctrl. #1 | H <sub>2</sub> O Transf. Ctrl. #2 | Untr. Cells Ctrl. #1 | Untr. Cells Ctrl. #2 |
|-------------------------------------|-------|-------|---------|---------|---------|---------|---------|---------|---------|---------|-----------------------------------|-----------------------------------|----------------------|----------------------|
| 6 h mCh_mRNA                        | 72    | 124   | 51      | 56      | 90      | 67      | 140     | 96      | 107     | 79      |                                   |                                   |                      |                      |
| 6 h mCh_mRNA <sub>UTR2</sub>        | 77    | 47    | 101     | 95      | 87      | 46      | 68      | 89      | 95      | 75      |                                   |                                   |                      |                      |
| 6 h H <sub>2</sub> O Transf. Ctrl.  |       |       |         |         |         |         |         |         |         |         | 20                                | 1                                 |                      |                      |
| 6 h Untr. Cells Ctrl.               |       |       |         |         |         |         |         |         |         |         |                                   |                                   | 33                   | 61                   |
| 24 h mCh_mRNA                       | 589   | 517   | 244     | 421     | 372     | 216     | 534     | 548     | 449     | 414     |                                   |                                   |                      |                      |
| 24 h mCh_mRNA <sub>UTR2</sub>       | 514   | 492   | 604     | 625     | 365     | 423     | 463     | 433     | 343     | 381     |                                   |                                   |                      |                      |
| 24 h H <sub>2</sub> O Transf. Ctrl. |       |       |         |         |         |         |         |         |         |         | 15                                | 33                                |                      |                      |
| 24 h Untr. Cells Ctrl.              |       |       |         |         |         |         |         |         |         |         |                                   |                                   | 88                   | 120                  |
| 48 h mCh_mRNA                       | 692   | 691   | 301     | 443     | 320     | 333     | 668     | 726     | 513     | 603     |                                   |                                   |                      |                      |
| 48 h mCh_mRNA <sub>UTR2</sub>       | 511   | 516   | 635     | 720     | 399     | 377     | 515     | 530     | 356     | 396     |                                   |                                   |                      |                      |
| 48 h H <sub>2</sub> O Transf. Ctrl. |       |       |         |         |         |         |         |         |         |         | 38                                | 8                                 |                      |                      |
| 48 h Untr. Cells Ctrl.              |       |       |         |         |         |         |         |         |         |         |                                   |                                   | 76                   | 45                   |

| mCherry protein standard [ng/well] | 0  | 20  | 40  | 60  | 80  | 100 |
|------------------------------------|----|-----|-----|-----|-----|-----|
| Standard curve #1                  | 17 | 251 | 281 | 415 | 564 | 669 |
| Standard curve #2                  | 53 | 170 | 361 | 438 | 632 | 706 |

|                                             |       |
|---------------------------------------------|-------|
| Background (mean value for 0 ng/well)       | 35    |
| Slope line of best fit                      | 7.24  |
| Coefficient of determination R <sup>2</sup> | 0.993 |

Exp. #8

|                                     | WT #1 | WT #2 | 1 CP #1 | 1 CP #2 | 2 CP #1 | 2 CP #2 | 1 PM #1 | 1 PM #2 | 2 PM #1 | 2 PM #2 | H <sub>2</sub> O Transf. Ctrl. #1 | H <sub>2</sub> O Transf. Ctrl. #2 | Untr. Cells Ctrl. #1 | Untr. Cells Ctrl. #2 |
|-------------------------------------|-------|-------|---------|---------|---------|---------|---------|---------|---------|---------|-----------------------------------|-----------------------------------|----------------------|----------------------|
| 6 h mCh_mRNA                        | 91    | 103   | 0       | 51      | 22      | 6       | 45      | 39      | 30      | 8       |                                   |                                   |                      |                      |
| 6 h mCh_mRNA <sub>UTR2</sub>        | 42    | 23    | 96      | 85      | 13      | 23      | 81      | 55      | 73      | 80      |                                   |                                   |                      |                      |
| 6 h H <sub>2</sub> O Transf. Ctrl.  |       |       |         |         |         |         |         |         |         |         | 34                                | 41                                |                      |                      |
| 6 h Untr. Cells Ctrl.               |       |       |         |         |         |         |         |         |         |         |                                   |                                   | 20                   | 45                   |
| 24 h mCh_mRNA                       | 587   | 616   | 231     | 378     | 260     | 389     | 536     | 538     | 395     | 480     |                                   |                                   |                      |                      |
| 24 h mCh_mRNA <sub>UTR2</sub>       | 443   | 447   | 545     | 620     | 372     | 304     | 421     | 395     | 309     | 303     |                                   |                                   |                      |                      |
| 24 h H <sub>2</sub> O Transf. Ctrl. |       |       |         |         |         |         |         |         |         |         | 65                                | 0                                 |                      |                      |
| 24 h Untr. Cells Ctrl.              |       |       |         |         |         |         |         |         |         |         |                                   |                                   | 35                   | 0                    |
| 48 h mCh_mRNA                       | 632   | 700   | 366     | 516     | 306     | 334     | 723     | 692     | 580     | 628     |                                   |                                   |                      |                      |
| 48 h mCh_mRNA <sub>UTR2</sub>       | 549   | 446   | 714     | 682     | 474     | 409     | 474     | 515     | 401     | 374     |                                   |                                   |                      |                      |
| 48 h H <sub>2</sub> O Transf. Ctrl. |       |       |         |         |         |         |         |         |         |         | 8                                 | 0                                 |                      |                      |
| 48 h Untr. Cells Ctrl.              |       |       |         |         |         |         |         |         |         |         |                                   |                                   | 37                   | 0                    |

| mCherry protein standard [ng/well] | 0  | 20  | 40  | 60  | 80  | 100 |
|------------------------------------|----|-----|-----|-----|-----|-----|
| Standard curve #1                  | 39 | 207 | 264 | 361 | 507 | 654 |
| Standard curve #2                  | 31 | 119 | 341 | 440 | 467 | 734 |

|                                             |       |
|---------------------------------------------|-------|
| Background (mean value for 0 ng/well)       | 35    |
| Slope line of best fit                      | 6.72  |
| Coefficient of determination R <sup>2</sup> | 0.994 |

Exp. #9

|                                     | WT #1 | WT #2 | 1 CP #1 | 1 CP #2 | 2 CP #1 | 2 CP #2 | 1 PM #1 | 1 PM #2 | 2 PM #1 | 2 PM #2 | H <sub>2</sub> O Transf. Ctrl. #1 | H <sub>2</sub> O Transf. Ctrl. #2 | Untr. Cells Ctrl. #1 | Untr. Cells Ctrl. #2 |
|-------------------------------------|-------|-------|---------|---------|---------|---------|---------|---------|---------|---------|-----------------------------------|-----------------------------------|----------------------|----------------------|
| 6 h mCh_mRNA                        | 0     | 2     | 0       | 59      | 4       | 0       | 32      | 39      | 0       | 41      |                                   |                                   |                      |                      |
| 6 h mCh_mRNA <sub>UTR2</sub>        | 0     | 8     | 0       | 9       | 14      | 55      | 0       | 18      | 57      | 14      |                                   |                                   |                      |                      |
| 6 h H <sub>2</sub> O Transf. Ctrl.  |       |       |         |         |         |         |         |         |         |         | 0                                 | 0                                 |                      |                      |
| 6 h Untr. Cells Ctrl.               |       |       |         |         |         |         |         |         |         |         |                                   |                                   | 0                    | 0                    |
| 24 h mCh_mRNA                       | 589   | 528   | 161     | 411     | 276     | 256     | 384     | 555     | 378     | 366     |                                   |                                   |                      |                      |
| 24 h mCh_mRNA <sub>UTR2</sub>       | 437   | 326   | 526     | 583     | 275     | 359     | 430     | 441     | 285     | 285     |                                   |                                   |                      |                      |
| 24 h H <sub>2</sub> O Transf. Ctrl. |       |       |         |         |         |         |         |         |         |         | 0                                 | 0                                 |                      |                      |
| 24 h Untr. Cells Ctrl.              |       |       |         |         |         |         |         |         |         |         |                                   |                                   | 0                    | 0                    |
| 48 h mCh_mRNA                       | 545   | 566   | 205     | 389     | 246     | 298     | 546     | 571     | 358     | 492     |                                   |                                   |                      |                      |
| 48 h mCh_mRNA <sub>UTR2</sub>       | 355   | 299   | 511     | 548     | 326     | 319     | 399     | 264     | 256     | 228     |                                   |                                   |                      |                      |
| 48 h H <sub>2</sub> O Transf. Ctrl. |       |       |         |         |         |         |         |         |         |         | 0                                 | 0                                 |                      |                      |
| 48 h Untr. Cells Ctrl.              |       |       |         |         |         |         |         |         |         |         |                                   |                                   | 0                    | 0                    |

| mCherry protein standard [ng/well] | 0 | 20  | 40  | 60  | 80  | 100 |
|------------------------------------|---|-----|-----|-----|-----|-----|
| Standard curve #1                  | 0 | 67  | 202 | 307 | 456 | 511 |
| Standard curve #2                  | 0 | 102 | 197 | 273 | 369 | 557 |

|                                             |       |
|---------------------------------------------|-------|
| Background (mean value for 0 ng/well)       | 0     |
| Slope line of best fit                      | 5.16  |
| Coefficient of determination R <sup>2</sup> | 0.998 |

Exp. #10

|                                     | WT #1 | WT #2 | 1 CP #1 | 1 CP #2 | 2 CP #1 | 2 CP #2 | 1 PM #1 | 1 PM #2 | 2 PM #1 | 2 PM #2 | H <sub>2</sub> O Transf. Ctrl. #1 | H <sub>2</sub> O Transf. Ctrl. #2 | Untr. Cells Ctrl. #1 | Untr. Cells Ctrl. #2 |
|-------------------------------------|-------|-------|---------|---------|---------|---------|---------|---------|---------|---------|-----------------------------------|-----------------------------------|----------------------|----------------------|
| 6 h mCh_mRNA                        | 1     | 18    | 0       | 25      | 6       | 0       | 19      | 0       | 0       | 51      |                                   |                                   |                      |                      |
| 6 h mCh_mRNA <sub>UTR2</sub>        | 0     | 21    | 31      | 22      | 54      | 0       | 0       | 21      | 54      | 0       |                                   |                                   |                      |                      |
| 6 h H <sub>2</sub> O Transf. Ctrl.  |       |       |         |         |         |         |         |         |         |         | 0                                 | 0                                 |                      |                      |
| 6 h Untr. Cells Ctrl.               |       |       |         |         |         |         |         |         |         |         |                                   |                                   | 0                    | 0                    |
| 24 h mCh_mRNA                       | 655   | 510   | 228     | 371     | 299     | 435     | 623     | 712     | 409     | 523     |                                   |                                   |                      |                      |
| 24 h mCh_mRNA <sub>UTR2</sub>       | 519   | 391   | 585     | 529     | 402     | 383     | 436     | 506     | 359     | 318     |                                   |                                   |                      |                      |
| 24 h H <sub>2</sub> O Transf. Ctrl. |       |       |         |         |         |         |         |         |         |         | 0                                 | 0                                 |                      |                      |

|                                     |     |     |     |     |     |     |     |     |     |     |  |   |   |   |   |
|-------------------------------------|-----|-----|-----|-----|-----|-----|-----|-----|-----|-----|--|---|---|---|---|
| 24 h Untr. Cells Ctrl.              |     |     |     |     |     |     |     |     |     |     |  |   |   | 0 | 0 |
| 48 h mCh_mRNA                       | 506 | 572 | 283 | 389 | 298 | 330 | 554 | 526 | 458 | 397 |  |   |   |   |   |
| 48 h mCh_mRNA <sup>UTR2</sup>       | 390 | 363 | 615 | 585 | 312 | 414 | 337 | 396 | 254 | 256 |  |   |   |   |   |
| 48 h H <sub>2</sub> O Transf. Ctrl. |     |     |     |     |     |     |     |     |     |     |  | 0 | 0 |   |   |
| 48 h Untr. Cells Ctrl.              |     |     |     |     |     |     |     |     |     |     |  |   |   | 0 | 0 |

|                                    |   |    |     |     |     |     |
|------------------------------------|---|----|-----|-----|-----|-----|
| mCherry protein standard [ng/well] | 0 | 20 | 40  | 60  | 80  | 100 |
| Standard curve #1                  | 0 | 15 | 122 | 312 | 436 | 506 |
| Standard curve #2                  | 0 | 69 | 245 | 236 | 282 | 502 |

|                                             |       |
|---------------------------------------------|-------|
| Background (mean value for 0 ng/well)       | 0     |
| Slope line of best fit                      | 4.72  |
| Coefficient of determination R <sup>2</sup> | 0.991 |

### mCh\_mRNA + mCh\_mRNA<sup>ψ+5mC</sup>

Exp. #1

|                                     | WT #1 | WT #2 | 1 CP #1 | 1 CP #2 | 2 CP #1 | 2 CP #2 | WT ψ+5mC #1 | WT ψ+5mC #2 | 1 CP ψ+5mC #1 | 1 CP ψ+5mC #2 | 2 CP ψ+5mC #1 | 2 CP ψ+5mC #2 | H <sub>2</sub> O Transf. Ctrl. #1 | H <sub>2</sub> O Transf. Ctrl. #2 | Untr. Cells Ctrl. #1 | Untr. Cells Ctrl. #2 |
|-------------------------------------|-------|-------|---------|---------|---------|---------|-------------|-------------|---------------|---------------|---------------|---------------|-----------------------------------|-----------------------------------|----------------------|----------------------|
| 6 h mCh_mRNA                        | 130   | 116   | 109     | 83      | 131     | 148     | 190         | 222         | 130           | 126           | 128           | 144           |                                   |                                   |                      |                      |
| 6 h H <sub>2</sub> O Transf. Ctrl.  |       |       |         |         |         |         |             |             |               |               |               |               | 13                                | 71                                |                      |                      |
| 6 h Untr. Cells Ctrl.               |       |       |         |         |         |         |             |             |               |               |               |               |                                   |                                   | 44                   | 67                   |
| 24 h mCh_mRNA                       | 869   | 1083  | 572     | 549     | 846     | 767     | 1850        | 1980        | 637           | 611           | 929           | 890           |                                   |                                   |                      |                      |
| 24 h H <sub>2</sub> O Transf. Ctrl. |       |       |         |         |         |         |             |             |               |               |               |               | 26                                | 2                                 |                      |                      |
| 24 h Untr. Cells Ctrl.              |       |       |         |         |         |         |             |             |               |               |               |               |                                   |                                   | 61                   | 64                   |
| 48 h mCh_mRNA                       | 1317  | 1468  | 775     | 834     | 1203    | 1204    | 2540        | 2509        | 901           | 921           | 1154          | 1141          |                                   |                                   |                      |                      |
| 48 h H <sub>2</sub> O Transf. Ctrl. |       |       |         |         |         |         |             |             |               |               |               |               | 35                                | 48                                |                      |                      |
| 48 h Untr. Cells Ctrl.              |       |       |         |         |         |         |             |             |               |               |               |               |                                   |                                   | 37                   | 47                   |

|                                    |    |     |     |     |     |     |
|------------------------------------|----|-----|-----|-----|-----|-----|
| mCherry protein standard [ng/well] | 0  | 20  | 40  | 60  | 80  | 100 |
| Standard curve #1                  | 6  | 127 | 262 | 347 | 354 | 450 |
| Standard curve #2                  | 86 | 138 | 238 | 307 | 386 | 383 |

|                                             |       |
|---------------------------------------------|-------|
| Background (mean value for 0 ng/well)       | 46    |
| Slope line of best fit                      | 4.68  |
| Coefficient of determination R <sup>2</sup> | 0.978 |

Exp. #2

|                                    | WT #1 | WT #2 | 1 CP #1 | 1 CP #2 | 2 CP #1 | 2 CP #2 | WT ψ+5mC #1 | WT ψ+5mC #2 | 1 CP ψ+5mC #1 | 1 CP ψ+5mC #2 | 2 CP ψ+5mC #1 | 2 CP ψ+5mC #2 | H <sub>2</sub> O Transf. Ctrl. #1 | H <sub>2</sub> O Transf. Ctrl. #2 | Untr. Cells Ctrl. #1 | Untr. Cells Ctrl. #2 |
|------------------------------------|-------|-------|---------|---------|---------|---------|-------------|-------------|---------------|---------------|---------------|---------------|-----------------------------------|-----------------------------------|----------------------|----------------------|
| 6 h mCh_mRNA                       | 121   | 98    | 96      | 92      | 189     | 161     | 231         | 249         | 138           | 106           | 217           | 346           |                                   |                                   |                      |                      |
| 6 h H <sub>2</sub> O Transf. Ctrl. |       |       |         |         |         |         |             |             |               |               |               |               | 18                                | 0                                 |                      |                      |
| 6 h Untr. Cells Ctrl.              |       |       |         |         |         |         |             |             |               |               |               |               |                                   |                                   | 2                    | 40                   |

|                                     |      |      |      |      |      |      |      |      |      |      |      |      |    |    |    |    |
|-------------------------------------|------|------|------|------|------|------|------|------|------|------|------|------|----|----|----|----|
| 24 h mCh_mRNA                       | 1236 | 1447 | 667  | 746  | 1405 | 1343 | 1681 | 1845 | 1216 | 1234 | 1869 | 1793 |    |    |    |    |
| 24 h H <sub>2</sub> O Transf. Ctrl. |      |      |      |      |      |      |      |      |      |      |      |      | 6  | 27 |    |    |
| 24 h Untr. Cells Ctrl.              |      |      |      |      |      |      |      |      |      |      |      |      |    |    | 36 | 3  |
| 48 h mCh_mRNA                       | 1936 | 2360 | 1201 | 1219 | 1880 | 2339 | 2716 | 2921 | 2364 | 1868 | 2777 | 2471 |    |    |    |    |
| 48 h H <sub>2</sub> O Transf. Ctrl. |      |      |      |      |      |      |      |      |      |      |      |      | 19 | 25 |    |    |
| 48 h Untr. Cells Ctrl.              |      |      |      |      |      |      |      |      |      |      |      |      |    |    | 13 | 21 |

|                                    |   |     |     |     |     |     |
|------------------------------------|---|-----|-----|-----|-----|-----|
| mCherry protein standard [ng/well] | 0 | 20  | 40  | 60  | 80  | 100 |
| Standard curve #1                  | 0 | 143 | 215 | 304 | 466 | 595 |
| Standard curve #2                  | 0 | 150 | 256 | 385 | 365 | 514 |

|                                             |       |
|---------------------------------------------|-------|
| Background (mean value for 0 ng/well)       | 0     |
| Slope line of best fit                      | 5.53  |
| Coefficient of determination R <sup>2</sup> | 0.997 |

Exp. #3

|                                     | WT #1 | WT #2 | 1 CP #1 | 1 CP #2 | 2 CP #1 | 2 CP #2 | WT $\Psi$ +5mC #1 | WT $\Psi$ +5mC #2 | 1 CP $\Psi$ +5mC #1 | 1 CP $\Psi$ +5mC #2 | 2 CP $\Psi$ +5mC #1 | 2 CP $\Psi$ +5mC #2 | H <sub>2</sub> O Transf. Ctrl. #1 | H <sub>2</sub> O Transf. Ctrl. #2 | Untr. Cells Ctrl. #1 | Untr. Cells Ctrl. #2 |
|-------------------------------------|-------|-------|---------|---------|---------|---------|-------------------|-------------------|---------------------|---------------------|---------------------|---------------------|-----------------------------------|-----------------------------------|----------------------|----------------------|
| 6 h mCh_mRNA                        | 0     | 92    | 0       | 27      | 76      | 37      | 91                | 65                | 75                  | 64                  | 147                 | 178                 |                                   |                                   |                      |                      |
| 6 h H <sub>2</sub> O Transf. Ctrl.  |       |       |         |         |         |         |                   |                   |                     |                     |                     |                     | 0                                 | 0                                 |                      |                      |
| 6 h Untr. Cells Ctrl.               |       |       |         |         |         |         |                   |                   |                     |                     |                     |                     |                                   |                                   | 0                    | 0                    |
| 24 h mCh_mRNA                       | 404   | 1017  | 432     | 545     | 1159    | 1141    | 1704              | 1275              | 1080                | 1078                | 1685                | 1643                |                                   |                                   |                      |                      |
| 24 h H <sub>2</sub> O Transf. Ctrl. |       |       |         |         |         |         |                   |                   |                     |                     |                     |                     | 0                                 | 0                                 |                      |                      |
| 24 h Untr. Cells Ctrl.              |       |       |         |         |         |         |                   |                   |                     |                     |                     |                     |                                   |                                   | 0                    | 0                    |
| 48 h mCh_mRNA                       | 594   | 1465  | 812     | 794     | 1477    | 1405    | 1687              | 1832              | 1541                | 1504                | 330                 | 1835                |                                   |                                   |                      |                      |
| 48 h H <sub>2</sub> O Transf. Ctrl. |       |       |         |         |         |         |                   |                   |                     |                     |                     |                     | 0                                 | 0                                 |                      |                      |
| 48 h Untr. Cells Ctrl.              |       |       |         |         |         |         |                   |                   |                     |                     |                     |                     |                                   |                                   | 0                    | 0                    |

|                                    |   |    |     |     |     |     |
|------------------------------------|---|----|-----|-----|-----|-----|
| mCherry protein standard [ng/well] | 0 | 20 | 40  | 60  | 80  | 100 |
| Standard curve #1                  | 0 | 55 | 187 | 271 | 411 | 472 |
| Standard curve #2                  | 0 | 72 | 199 | 215 | 402 | 481 |

|                                             |       |
|---------------------------------------------|-------|
| Background (mean value for 0 ng/well)       | 0     |
| Slope line of best fit                      | 4.77  |
| Coefficient of determination R <sup>2</sup> | 0.995 |

Exp. #4

|                                    | WT #1 | WT #2 | 1 CP #1 | 1 CP #2 | 2 CP #1 | 2 CP #2 | WT $\Psi$ +5mC #1 | WT $\Psi$ +5mC #2 | 1 CP $\Psi$ +5mC #1 | 1 CP $\Psi$ +5mC #2 | 2 CP $\Psi$ +5mC #1 | 2 CP $\Psi$ +5mC #2 | H <sub>2</sub> O Transf. Ctrl. #1 | H <sub>2</sub> O Transf. Ctrl. #2 | Untr. Cells Ctrl. #1 | Untr. Cells Ctrl. #2 |
|------------------------------------|-------|-------|---------|---------|---------|---------|-------------------|-------------------|---------------------|---------------------|---------------------|---------------------|-----------------------------------|-----------------------------------|----------------------|----------------------|
| 6 h mCh_mRNA                       | 38    | 22    | 21      | 76      | 83      | 112     | 177               | 131               | 111                 | 78                  | 167                 | 246                 |                                   |                                   |                      |                      |
| 6 h H <sub>2</sub> O Transf. Ctrl. |       |       |         |         |         |         |                   |                   |                     |                     |                     |                     | 0                                 | 0                                 |                      |                      |
| 6 h Untr. Cells Ctrl.              |       |       |         |         |         |         |                   |                   |                     |                     |                     |                     |                                   |                                   | 0                    | 52                   |
| 24 h mCh_mRNA                      | 313   | 761   | 439     | 521     | 1036    | 999     | 1082              | 1087              | 1042                | 909                 | 1667                | 1352                |                                   |                                   |                      |                      |

|                                     |     |      |     |     |      |      |      |      |      |      |      |      |  |   |    |   |    |
|-------------------------------------|-----|------|-----|-----|------|------|------|------|------|------|------|------|--|---|----|---|----|
| 24 h H <sub>2</sub> O Transf. Ctrl. |     |      |     |     |      |      |      |      |      |      |      |      |  | 5 | 0  |   |    |
| 24 h Untr. Cells Ctrl.              |     |      |     |     |      |      |      |      |      |      |      |      |  |   |    | 0 | 15 |
| 48 h mCh <sub>2</sub> mRNA          | 504 | 1389 | 897 | 950 | 1584 | 1198 | 1446 | 1788 | 1442 | 1492 | 2055 | 1862 |  |   |    |   |    |
| 48 h H <sub>2</sub> O Transf. Ctrl. |     |      |     |     |      |      |      |      |      |      |      |      |  | 0 | 55 |   |    |
| 48 h Untr. Cells Ctrl.              |     |      |     |     |      |      |      |      |      |      |      |      |  |   |    | 0 | 0  |

|                                           |          |           |           |           |           |            |
|-------------------------------------------|----------|-----------|-----------|-----------|-----------|------------|
| <b>mCherry protein standard [ng/well]</b> | <b>0</b> | <b>20</b> | <b>40</b> | <b>60</b> | <b>80</b> | <b>100</b> |
| <b>Standard curve #1</b>                  | 0        | 139       | 282       | 418       | 480       | 605        |
| <b>Standard curve #2</b>                  | 0        | 121       | 283       | 286       | 475       | 648        |

|                                                   |       |
|---------------------------------------------------|-------|
| <b>Background (mean value for 0 ng/well)</b>      | 0     |
| <b>Slope line of best fit</b>                     | 6.18  |
| <b>Coefficient of determination R<sup>2</sup></b> | 0.998 |

Exp. #5

|                                     | WT #1 | WT #2 | 1 CP #1 | 1 CP #2 | 2 CP #1 | 2 CP #2 | WT $\Psi$ +5mC #1 | WT $\Psi$ +5mC #2 | 1 CP $\Psi$ +5mC #1 | 1 CP $\Psi$ +5mC #2 | 2 CP $\Psi$ +5mC #1 | 2 CP $\Psi$ +5mC #2 | H <sub>2</sub> O Transf. Ctrl. #1 | H <sub>2</sub> O Transf. Ctrl. #2 | Untr. Cells Ctrl. #1 | Untr. Cells Ctrl. #2 |
|-------------------------------------|-------|-------|---------|---------|---------|---------|-------------------|-------------------|---------------------|---------------------|---------------------|---------------------|-----------------------------------|-----------------------------------|----------------------|----------------------|
| 6 h mCh <sub>2</sub> mRNA           | 101   | 68    | 43      | 62      | 104     | 106     | 110               | 85                | 140                 | 79                  | 171                 | 126                 |                                   |                                   |                      |                      |
| 6 h H <sub>2</sub> O Transf. Ctrl.  |       |       |         |         |         |         |                   |                   |                     |                     |                     |                     | 0                                 | 0                                 |                      |                      |
| 6 h Untr. Cells Ctrl.               |       |       |         |         |         |         |                   |                   |                     |                     |                     |                     |                                   |                                   | 0                    | 0                    |
| 24 h mCh <sub>2</sub> mRNA          | 503   | 673   | 216     | 291     | 950     | 992     | 915               | 1114              | 643                 | 667                 | 1024                | 951                 |                                   |                                   |                      |                      |
| 24 h H <sub>2</sub> O Transf. Ctrl. |       |       |         |         |         |         |                   |                   |                     |                     |                     |                     | 20                                | 0                                 |                      |                      |
| 24 h Untr. Cells Ctrl.              |       |       |         |         |         |         |                   |                   |                     |                     |                     |                     |                                   |                                   | 0                    | 0                    |
| 48 h mCh <sub>2</sub> mRNA          | 287   | 1092  | 548     | 616     | 1460    | 1400    | 1520              | 1689              | 975                 | 959                 | 1538                | 1449                |                                   |                                   |                      |                      |
| 48 h H <sub>2</sub> O Transf. Ctrl. |       |       |         |         |         |         |                   |                   |                     |                     |                     |                     | 0                                 | 0                                 |                      |                      |
| 48 h Untr. Cells Ctrl.              |       |       |         |         |         |         |                   |                   |                     |                     |                     |                     |                                   |                                   | 0                    | 0                    |

|                                           |          |           |           |           |           |            |
|-------------------------------------------|----------|-----------|-----------|-----------|-----------|------------|
| <b>mCherry protein standard [ng/well]</b> | <b>0</b> | <b>20</b> | <b>40</b> | <b>60</b> | <b>80</b> | <b>100</b> |
| <b>Standard curve #1</b>                  | 0        | 101       | 159       | 315       | 389       | 535        |
| <b>Standard curve #2</b>                  | 0        | 103       | 219       | 324       | 434       | 523        |

|                                                   |      |
|---------------------------------------------------|------|
| <b>Background (mean value for 0 ng/well)</b>      | 0    |
| <b>Slope line of best fit</b>                     | 5.33 |
| <b>Coefficient of determination R<sup>2</sup></b> | 1    |

Exp. #6

|                                     | WT #1 | WT #2 | 1 CP #1 | 1 CP #2 | 2 CP #1 | 2 CP #2 | WT $\Psi$ +5mC #1 | WT $\Psi$ +5mC #2 | 1 CP $\Psi$ +5mC #1 | 1 CP $\Psi$ +5mC #2 | 2 CP $\Psi$ +5mC #1 | 2 CP $\Psi$ +5mC #2 | H <sub>2</sub> O Transf. Ctrl. #1 | H <sub>2</sub> O Transf. Ctrl. #2 | Untr. Cells Ctrl. #1 | Untr. Cells Ctrl. #2 |
|-------------------------------------|-------|-------|---------|---------|---------|---------|-------------------|-------------------|---------------------|---------------------|---------------------|---------------------|-----------------------------------|-----------------------------------|----------------------|----------------------|
| 6 h mCh <sub>2</sub> mRNA           | 89    | 90    | 46      | 34      | 118     | 65      | 65                | 107               | 50                  | 73                  | 84                  | 127                 |                                   |                                   |                      |                      |
| 6 h H <sub>2</sub> O Transf. Ctrl.  |       |       |         |         |         |         |                   |                   |                     |                     |                     |                     | 0                                 | 0                                 |                      |                      |
| 6 h Untr. Cells Ctrl.               |       |       |         |         |         |         |                   |                   |                     |                     |                     |                     |                                   |                                   | 0                    | 0                    |
| 24 h mCh <sub>2</sub> mRNA          | 524   | 647   | 327     | 367     | 1142    | 1073    | 1071              | 1145              | 687                 | 713                 | 1152                | 1242                |                                   |                                   |                      |                      |
| 24 h H <sub>2</sub> O Transf. Ctrl. |       |       |         |         |         |         |                   |                   |                     |                     |                     |                     | 0                                 | 0                                 |                      |                      |



|                                     |      |      |     |     |      |      |      |      |      |      |      |      |  |   |   |   |   |
|-------------------------------------|------|------|-----|-----|------|------|------|------|------|------|------|------|--|---|---|---|---|
| 24 h Untr. Cells Ctrl.              |      |      |     |     |      |      |      |      |      |      |      |      |  |   |   | 0 | 2 |
| 48 h mCh_mRNA                       | 1110 | 1468 | 742 | 789 | 1751 | 1608 | 1710 | 1992 | 1175 | 1167 | 1584 | 1451 |  |   |   |   |   |
| 48 h H <sub>2</sub> O Transf. Ctrl. |      |      |     |     |      |      |      |      |      |      |      |      |  | 0 | 0 |   |   |
| 48 h Untr. Cells Ctrl.              |      |      |     |     |      |      |      |      |      |      |      |      |  |   |   | 0 | 0 |

|                                           |          |           |           |           |           |            |
|-------------------------------------------|----------|-----------|-----------|-----------|-----------|------------|
| <b>mCherry protein standard [ng/well]</b> | <b>0</b> | <b>20</b> | <b>40</b> | <b>60</b> | <b>80</b> | <b>100</b> |
| <b>Standard curve #1</b>                  | 0        | 96        | 260       | 314       | 449       | 505        |
| <b>Standard curve #2</b>                  | 6        | 117       | 203       | 344       | 484       | 465        |

|                                                   |       |
|---------------------------------------------------|-------|
| <b>Background (mean value for 0 ng/well)</b>      | 3     |
| <b>Slope line of best fit</b>                     | 5.34  |
| <b>Coefficient of determination R<sup>2</sup></b> | 0.994 |

Exp. #7

|                                     | WT #1 | WT #2 | 1 CP #1 | 1 CP #2 | 2 CP #1 | 2 CP #2 | WT $\Psi$ +5mC #1 | WT $\Psi$ +5mC #2 | 1 CP $\Psi$ +5mC #1 | 1 CP $\Psi$ +5mC #2 | 2 CP $\Psi$ +5mC #1 | 2 CP $\Psi$ +5mC #2 | H <sub>2</sub> O Transf. Ctrl. #1 | H <sub>2</sub> O Transf. Ctrl. #2 | Untr. Cells Ctrl. #1 | Untr. Cells Ctrl. #2 |
|-------------------------------------|-------|-------|---------|---------|---------|---------|-------------------|-------------------|---------------------|---------------------|---------------------|---------------------|-----------------------------------|-----------------------------------|----------------------|----------------------|
| 6 h mCh_mRNA                        | 94    | 177   | 169     | 186     | 144     | 148     | 441               | 443               | 359                 | 362                 | 373                 | 321                 |                                   |                                   |                      |                      |
| 6 h H <sub>2</sub> O Transf. Ctrl.  |       |       |         |         |         |         |                   |                   |                     |                     |                     |                     | 65                                | 37                                |                      |                      |
| 6 h Untr. Cells Ctrl.               |       |       |         |         |         |         |                   |                   |                     |                     |                     |                     |                                   |                                   | 101                  | 92                   |
| 24 h mCh_mRNA                       | 683   | 857   | 875     | 872     | 1009    | 900     | 2732              | 3041              | 1951                | 2176                | 2071                | 1891                |                                   |                                   |                      |                      |
| 24 h H <sub>2</sub> O Transf. Ctrl. |       |       |         |         |         |         |                   |                   |                     |                     |                     |                     | 71                                | 101                               |                      |                      |
| 24 h Untr. Cells Ctrl.              |       |       |         |         |         |         |                   |                   |                     |                     |                     |                     |                                   |                                   | 93                   | 87                   |
| 48 h mCh_mRNA                       | 1019  | 1347  | 1523    | 1476    | 1488    | 1454    | 4304              | 4424              | 2931                | 2923                | 3027                | 2894                |                                   |                                   |                      |                      |
| 48 h H <sub>2</sub> O Transf. Ctrl. |       |       |         |         |         |         |                   |                   |                     |                     |                     |                     | 119                               | 96                                |                      |                      |
| 48 h Untr. Cells Ctrl.              |       |       |         |         |         |         |                   |                   |                     |                     |                     |                     |                                   |                                   | 83                   | 81                   |

|                                           |          |           |           |           |           |            |
|-------------------------------------------|----------|-----------|-----------|-----------|-----------|------------|
| <b>mCherry protein standard [ng/well]</b> | <b>0</b> | <b>20</b> | <b>40</b> | <b>60</b> | <b>80</b> | <b>100</b> |
| <b>Standard curve #1</b>                  | 87       | 226       | 298       | 488       | 633       | 787        |
| <b>Standard curve #2</b>                  | 112      | 243       | 413       | 514       | 575       | 739        |

|                                                   |       |
|---------------------------------------------------|-------|
| <b>Background (mean value for 0 ng/well)</b>      | 99.5  |
| <b>Slope line of best fit</b>                     | 7.96  |
| <b>Coefficient of determination R<sup>2</sup></b> | 0.991 |

Exp. #8

|                                     | WT #1 | WT #2 | 1 CP #1 | 1 CP #2 | 2 CP #1 | 2 CP #2 | WT $\Psi$ +5mC #1 | WT $\Psi$ +5mC #2 | 1 CP $\Psi$ +5mC #1 | 1 CP $\Psi$ +5mC #2 | 2 CP $\Psi$ +5mC #1 | 2 CP $\Psi$ +5mC #2 | H <sub>2</sub> O Transf. Ctrl. #1 | H <sub>2</sub> O Transf. Ctrl. #2 | Untr. Cells Ctrl. #1 | Untr. Cells Ctrl. #2 |
|-------------------------------------|-------|-------|---------|---------|---------|---------|-------------------|-------------------|---------------------|---------------------|---------------------|---------------------|-----------------------------------|-----------------------------------|----------------------|----------------------|
| 6 h mCh_mRNA                        | 45    | 67    | 104     | 58      | 35      | 87      | 298               | 290               | 229                 | 233                 | 259                 | 266                 |                                   |                                   |                      |                      |
| 6 h H <sub>2</sub> O Transf. Ctrl.  |       |       |         |         |         |         |                   |                   |                     |                     |                     |                     | 2                                 | 0                                 |                      |                      |
| 6 h Untr. Cells Ctrl.               |       |       |         |         |         |         |                   |                   |                     |                     |                     |                     |                                   |                                   | 0                    | 0                    |
| 24 h mCh_mRNA                       | 592   | 728   | 734     | 796     | 794     | 771     | 2512              | 2818              | 1696                | 1880                | 1961                | 1759                |                                   |                                   |                      |                      |
| 24 h H <sub>2</sub> O Transf. Ctrl. |       |       |         |         |         |         |                   |                   |                     |                     |                     |                     | 0                                 | 15                                |                      |                      |
| 24 h Untr. Cells Ctrl.              |       |       |         |         |         |         |                   |                   |                     |                     |                     |                     |                                   |                                   | 2                    | 9                    |

|                                     |     |      |      |      |      |      |      |      |      |      |      |      |    |   |   |    |
|-------------------------------------|-----|------|------|------|------|------|------|------|------|------|------|------|----|---|---|----|
| 48 h mCh_mRNA                       | 970 | 1270 | 1288 | 1390 | 1323 | 1321 | 4006 | 4200 | 2715 | 2682 | 2752 | 2671 |    |   |   |    |
| 48 h H <sub>2</sub> O Transf. Ctrl. |     |      |      |      |      |      |      |      |      |      |      |      | 13 | 0 |   |    |
| 48 h Untr. Cells Ctrl.              |     |      |      |      |      |      |      |      |      |      |      |      |    |   | 0 | 29 |

|                                    |   |     |     |     |     |     |
|------------------------------------|---|-----|-----|-----|-----|-----|
| mCherry protein standard [ng/well] | 0 | 20  | 40  | 60  | 80  | 100 |
| Standard curve #1                  | 0 | 120 | 250 | 345 | 492 | 627 |
| Standard curve #2                  | 5 | 138 | 226 | 356 | 526 | 596 |

|                                             |       |
|---------------------------------------------|-------|
| Background (mean value for 0 ng/well)       | 2.5   |
| Slope line of best fit                      | 6.14  |
| Coefficient of determination R <sup>2</sup> | 0.999 |

Exp. #9

|                                     | WT #1 | WT #2 | 1 CP #1 | 1 CP #2 | 2 CP #1 | 2 CP #2 | WT $\Psi$ +5mC #1 | WT $\Psi$ +5mC #2 | 1 CP $\Psi$ +5mC #1 | 1 CP $\Psi$ +5mC #2 | 2 CP $\Psi$ +5mC #1 | 2 CP $\Psi$ +5mC #2 | H <sub>2</sub> O Transf. Ctrl. #1 | H <sub>2</sub> O Transf. Ctrl. #2 | Untr. Cells Ctrl. #1 | Untr. Cells Ctrl. #2 |
|-------------------------------------|-------|-------|---------|---------|---------|---------|-------------------|-------------------|---------------------|---------------------|---------------------|---------------------|-----------------------------------|-----------------------------------|----------------------|----------------------|
| 6 h mCh_mRNA                        | 59    | 37    | 99      | 132     | 81      | 88      | 117               | 110               | 247                 | 176                 | 246                 | 242                 |                                   |                                   |                      |                      |
| 6 h H <sub>2</sub> O Transf. Ctrl.  |       |       |         |         |         |         |                   |                   |                     |                     |                     |                     | 32                                | 76                                |                      |                      |
| 6 h Untr. Cells Ctrl.               |       |       |         |         |         |         |                   |                   |                     |                     |                     |                     |                                   |                                   | 0                    | 0                    |
| 24 h mCh_mRNA                       | 284   | 683   | 884     | 827     | 1057    | 889     | 709               | 727               | 928                 | 1154                | 2096                | 1883                |                                   |                                   |                      |                      |
| 24 h H <sub>2</sub> O Transf. Ctrl. |       |       |         |         |         |         |                   |                   |                     |                     |                     |                     | 18                                | 0                                 |                      |                      |
| 24 h Untr. Cells Ctrl.              |       |       |         |         |         |         |                   |                   |                     |                     |                     |                     |                                   |                                   | 0                    | 0                    |
| 48 h mCh_mRNA                       | 369   | 1137  | 1274    | 1273    | 1208    | 1091    | 1075              | 1142              | 2000                | 2521                | 2477                | 2139                |                                   |                                   |                      |                      |
| 48 h H <sub>2</sub> O Transf. Ctrl. |       |       |         |         |         |         |                   |                   |                     |                     |                     |                     | 18                                | 71                                |                      |                      |
| 48 h Untr. Cells Ctrl.              |       |       |         |         |         |         |                   |                   |                     |                     |                     |                     |                                   |                                   | 0                    | 0                    |

|                                    |    |     |     |     |     |     |
|------------------------------------|----|-----|-----|-----|-----|-----|
| mCherry protein standard [ng/well] | 0  | 20  | 40  | 60  | 80  | 100 |
| Standard curve #1                  | 32 | 131 | 206 | 383 | 545 | 634 |
| Standard curve #2                  | 0  | 161 | 284 | 369 | 576 | 774 |

|                                             |       |
|---------------------------------------------|-------|
| Background (mean value for 0 ng/well)       | 16    |
| Slope line of best fit                      | 6.84  |
| Coefficient of determination R <sup>2</sup> | 0.997 |

Exp. #10

|                                     | WT #1 | WT #2 | 1 CP #1 | 1 CP #2 | 2 CP #1 | 2 CP #2 | WT $\Psi$ +5mC #1 | WT $\Psi$ +5mC #2 | 1 CP $\Psi$ +5mC #1 | 1 CP $\Psi$ +5mC #2 | 2 CP $\Psi$ +5mC #1 | 2 CP $\Psi$ +5mC #2 | H <sub>2</sub> O Transf. Ctrl. #1 | H <sub>2</sub> O Transf. Ctrl. #2 | Untr. Cells Ctrl. #1 | Untr. Cells Ctrl. #2 |
|-------------------------------------|-------|-------|---------|---------|---------|---------|-------------------|-------------------|---------------------|---------------------|---------------------|---------------------|-----------------------------------|-----------------------------------|----------------------|----------------------|
| 6 h mCh_mRNA                        | 91    | 150   | 176     | 143     | 133     | 191     | 196               | 152               | 291                 | 281                 | 321                 | 316                 |                                   |                                   |                      |                      |
| 6 h H <sub>2</sub> O Transf. Ctrl.  |       |       |         |         |         |         |                   |                   |                     |                     |                     |                     | 66                                | 153                               |                      |                      |
| 6 h Untr. Cells Ctrl.               |       |       |         |         |         |         |                   |                   |                     |                     |                     |                     |                                   |                                   | 95                   | 48                   |
| 24 h mCh_mRNA                       | 355   | 813   | 898     | 848     | 1063    | 869     | 761               | 719               | 1040                | 1216                | 1984                | 1847                |                                   |                                   |                      |                      |
| 24 h H <sub>2</sub> O Transf. Ctrl. |       |       |         |         |         |         |                   |                   |                     |                     |                     |                     | 93                                | 50                                |                      |                      |
| 24 h Untr. Cells Ctrl.              |       |       |         |         |         |         |                   |                   |                     |                     |                     |                     |                                   |                                   | 88                   | 85                   |
| 48 h mCh_mRNA                       | 469   | 1186  | 1307    | 1314    | 1164    | 1175    | 1137              | 1115              | 1977                | 2409                | 2341                | 2299                |                                   |                                   |                      |                      |

|                                     |  |  |  |  |  |  |  |  |  |  |  |  |    |    |     |    |
|-------------------------------------|--|--|--|--|--|--|--|--|--|--|--|--|----|----|-----|----|
| 48 h H <sub>2</sub> O Transf. Ctrl. |  |  |  |  |  |  |  |  |  |  |  |  | 77 | 52 |     |    |
| 48 h Untr. Cells Ctrl.              |  |  |  |  |  |  |  |  |  |  |  |  |    |    | 107 | 18 |

|                                           |          |           |           |           |           |            |
|-------------------------------------------|----------|-----------|-----------|-----------|-----------|------------|
| <b>mCherry protein standard [ng/well]</b> | <b>0</b> | <b>20</b> | <b>40</b> | <b>60</b> | <b>80</b> | <b>100</b> |
| <b>Standard curve #1</b>                  | 70       | 204       | 290       | 372       | 654       | 635        |
| <b>Standard curve #2</b>                  | 86       | 283       | 298       | 425       | 549       | 807        |

|                                                   |       |
|---------------------------------------------------|-------|
| <b>Background (mean value for 0 ng/well)</b>      | 78    |
| <b>Slope line of best fit</b>                     | 7.31  |
| <b>Coefficient of determination R<sup>2</sup></b> | 0.985 |

**Mean values [ng mCherry protein/well] and standard deviation of duplicate samples, background subtracted and divided by slope of linear standard curve (individual for each measurement)**

**mCh\_mRNA + mCh\_mRNA<sub>UTR 2</sub>**

Exp. #1

|                                          | WT    | error | 1 CP  | error | 2 CP  | error | 1 PM  | error | 2 PM  | error | H <sub>2</sub> O Transf. Ctrl. | error | Untr. Cells Ctrl. | error |
|------------------------------------------|-------|-------|-------|-------|-------|-------|-------|-------|-------|-------|--------------------------------|-------|-------------------|-------|
| <b>6 h mCh_mRNA</b>                      | -0.84 | 1.15  | -1.53 | 9.20  | 3.53  | 0.46  | -3.45 | 7.29  | -4.30 | 6.14  |                                |       |                   |       |
| <b>6 h mCh_mRNA<sub>UTR2</sub></b>       | 2.61  | 1.07  | 0.61  | 0.00  | -4.83 | 5.91  | 5.29  | 4.68  | -1.46 | 2.07  |                                |       |                   |       |
| <b>6 h H<sub>2</sub>O Transf. Ctrl.</b>  |       |       |       |       |       |       |       |       |       |       | -1.61                          | 2.84  |                   |       |
| <b>6 h Untr. Cells Ctrl.</b>             |       |       |       |       |       |       |       |       |       |       |                                |       | -4.45             | 3.83  |
| <b>24 h mCh_mRNA</b>                     | 49.16 | 3.91  | 34.59 | 10.51 | 57.68 | 8.44  | 57.22 | 2.61  | 46.63 | 3.53  |                                |       |                   |       |
| <b>24 h mCh_mRNA<sub>UTR2</sub></b>      | 32.37 | 10.74 | 42.57 | 4.37  | 29.15 | 1.53  | 41.88 | 4.45  | 32.67 | 5.83  |                                |       |                   |       |
| <b>24 h H<sub>2</sub>O Transf. Ctrl.</b> |       |       |       |       |       |       |       |       |       |       | -6.83                          | 3.91  |                   |       |
| <b>24 h Untr. Cells Ctrl.</b>            |       |       |       |       |       |       |       |       |       |       |                                |       | -7.29             | 3.14  |
| <b>48 h mCh_mRNA</b>                     | 78.92 | 3.60  | 43.33 | 24.01 | 82.91 | 5.29  | 77.23 | 1.46  | 62.51 | 11.58 |                                |       |                   |       |
| <b>48 h mCh_mRNA<sub>UTR2</sub></b>      | 41.88 | 1.84  | 62.51 | 5.14  | 53.84 | 6.60  | 59.06 | 1.84  | 48.63 | 6.14  |                                |       |                   |       |
| <b>48 h H<sub>2</sub>O Transf. Ctrl.</b> |       |       |       |       |       |       |       |       |       |       | -2.45                          | 4.45  |                   |       |
| <b>48 h Untr. Cells Ctrl.</b>            |       |       |       |       |       |       |       |       |       |       |                                |       | -4.30             | 1.99  |

Exp. #2

|                                          | WT    | error | 1 CP  | error | 2 CP  | error | 1 PM  | error | 2 PM  | error | H <sub>2</sub> O Transf. Ctrl. | error | Untr. Cells Ctrl. | error |
|------------------------------------------|-------|-------|-------|-------|-------|-------|-------|-------|-------|-------|--------------------------------|-------|-------------------|-------|
| <b>6 h mCh_mRNA</b>                      | 4.08  | 2.72  | 0,00  | 0,00  | 0.68  | 0.68  | 4.08  | 4.08  | 4.76  | 4.76  |                                |       |                   |       |
| <b>6 h mCh_mRNA<sub>UTR2</sub></b>       | 6.25  | 6.25  | 6,53  | 2,18  | 0.00  | 0.00  | 12.37 | 8.29  | 11.28 | 0.14  |                                |       |                   |       |
| <b>6 h H<sub>2</sub>O Transf. Ctrl.</b>  |       |       |       |       |       |       |       |       |       |       | 0.00                           | 0.00  |                   |       |
| <b>6 h Untr. Cells Ctrl.</b>             |       |       |       |       |       |       |       |       |       |       |                                |       | 0.00              | 0.00  |
| <b>24 h mCh_mRNA</b>                     | 94.90 | 13.32 | 53,97 | 16,72 | 93.13 | 1.77  | 88.23 | 3.13  | 67.57 | 0.68  |                                |       |                   |       |
| <b>24 h mCh_mRNA<sub>UTR2</sub></b>      | 62.13 | 11.28 | 72,74 | 2,31  | 49.35 | 2.86  | 61.32 | 8.29  | 62.81 | 7.34  |                                |       |                   |       |
| <b>24 h H<sub>2</sub>O Transf. Ctrl.</b> |       |       |       |       |       |       |       |       |       |       | 0.00                           | 0.00  |                   |       |
| <b>24 h Untr. Cells Ctrl.</b>            |       |       |       |       |       |       |       |       |       |       |                                |       | 0.00              | 0.00  |

|                                     |        |      |        |      |        |      |        |       |        |       |      |      |      |      |
|-------------------------------------|--------|------|--------|------|--------|------|--------|-------|--------|-------|------|------|------|------|
| 48 h mCh_mRNA                       | 134.05 | 6.25 | 78,45  | 0,95 | 140.71 | 3.13 | 111.62 | 27.33 | 101.15 | 5.98  |      |      |      |      |
| 48 h mCh_mRNA <sub>UTR2</sub>       | 93.81  | 0.54 | 105,91 | 2,31 | 61.18  | 6.80 | 101.29 | 3.13  | 67.03  | 27.60 |      |      |      |      |
| 48 h H <sub>2</sub> O Transf. Ctrl. |        |      |        |      |        |      |        |       |        |       | 0.68 | 0.68 |      |      |
| 48 h Untr. Cells Ctrl.              |        |      |        |      |        |      |        |       |        |       |      |      | 3.53 | 3.53 |

Exp. #3

|                                     | WT     | error | 1 CP  | error | 2 CP   | error | 1 PM   | error | 2 PM   | error | H <sub>2</sub> O Transf. Ctrl. | error | Untr. Cells Ctrl. | error |
|-------------------------------------|--------|-------|-------|-------|--------|-------|--------|-------|--------|-------|--------------------------------|-------|-------------------|-------|
| 6 h mCh_mRNA                        | 18.04  | 1.85  | -1.85 | 6.74  | 20.65  | 2.50  | 13.80  | 7.17  | -0.65  | 3.15  |                                |       |                   |       |
| 6 h mCh_mRNA <sub>UTR2</sub>        | 9.13   | 1.20  | -3.37 | 2.83  | 2.72   | 0.43  | 5.43   | 5.54  | 0.22   | 1.20  |                                |       |                   |       |
| 6 h H <sub>2</sub> O Transf. Ctrl.  |        |       |       |       |        |       |        |       |        |       | 2.17                           | 4.89  |                   |       |
| 6 h Untr. Cells Ctrl.               |        |       |       |       |        |       |        |       |        |       |                                |       | -1.09             | 7.28  |
| 24 h mCh_mRNA                       | 176.18 | 4.56  | 57.49 | 15.00 | 112.92 | 3.70  | 140.75 | 11.52 | 111.84 | 10.87 |                                |       |                   |       |
| 24 h mCh_mRNA <sub>UTR2</sub>       | 74.34  | 12.28 | 74.45 | 17.17 | 47.39  | 8.15  | 82.82  | 9.67  | 63.58  | 0.65  |                                |       |                   |       |
| 24 h H <sub>2</sub> O Transf. Ctrl. |        |       |       |       |        |       |        |       |        |       | -6.74                          | 1.20  |                   |       |
| 24 h Untr. Cells Ctrl.              |        |       |       |       |        |       |        |       |        |       |                                |       | 0.33              | 0.65  |
| 48 h mCh_mRNA                       | 234.97 | 15.54 | 82.82 | 19.67 | 142.81 | 19.45 | 219.22 | 20.00 | 156.94 | 14.02 |                                |       |                   |       |
| 48 h mCh_mRNA <sub>UTR2</sub>       | 98.03  | 0.33  | 91.08 | 2.72  | 85.10  | 11.52 | 96.08  | 9.89  | 87.27  | 6.74  |                                |       |                   |       |
| 48 h H <sub>2</sub> O Transf. Ctrl. |        |       |       |       |        |       |        |       |        |       | -2.39                          | 0.54  |                   |       |
| 48 h Untr. Cells Ctrl.              |        |       |       |       |        |       |        |       |        |       |                                |       | -2.83             | 5.76  |

Exp. #4

|                                     | WT     | error | 1 CP   | error | 2 CP   | error | 1 PM   | error | 2 PM   | error | H <sub>2</sub> O Transf. Ctrl. | error | Untr. Cells Ctrl. | error |
|-------------------------------------|--------|-------|--------|-------|--------|-------|--------|-------|--------|-------|--------------------------------|-------|-------------------|-------|
| 6 h mCh_mRNA                        | 5.68   | 2.48  | -3.10  | 7.13  | 16.73  | 5.47  | 7.85   | 1.14  | -1.34  | 3.51  |                                |       |                   |       |
| 6 h mCh_mRNA <sub>UTR2</sub>        | 0.72   | 4.54  | 1.24   | 0.72  | -2.69  | 4.03  | 8.26   | 2.38  | 4.54   | 3.82  |                                |       |                   |       |
| 6 h H <sub>2</sub> O Transf. Ctrl.  |        |       |        |       |        |       |        |       |        |       | -3.10                          | 5.27  |                   |       |
| 6 h Untr. Cells Ctrl.               |        |       |        |       |        |       |        |       |        |       |                                |       | -5.68             | 4.54  |
| 24 h mCh_mRNA                       | 202.56 | 9.30  | 75.72  | 19.21 | 158.14 | 11.16 | 192.54 | 3.00  | 131.70 | 6.40  |                                |       |                   |       |
| 24 h mCh_mRNA <sub>UTR2</sub>       | 107.94 | 7.23  | 91.11  | 10.85 | 72.31  | 7.54  | 100.82 | 4.65  | 81.91  | 8.26  |                                |       |                   |       |
| 24 h H <sub>2</sub> O Transf. Ctrl. |        |       |        |       |        |       |        |       |        |       | -3.31                          | 5.27  |                   |       |
| 24 h Untr. Cells Ctrl.              |        |       |        |       |        |       |        |       |        |       |                                |       | -2.69             | 0.52  |
| 48 h mCh_mRNA                       | 298.11 | 14.15 | 101.75 | 10.33 | 244.19 | 5.68  | 280.55 | 14.98 | 218.78 | 12.71 |                                |       |                   |       |
| 48 h mCh_mRNA <sub>UTR2</sub>       | 157.83 | 7.75  | 121.06 | 7.33  | 108.15 | 5.37  | 146.47 | 12.09 | 111.25 | 5.16  |                                |       |                   |       |
| 48 h H <sub>2</sub> O Transf. Ctrl. |        |       |        |       |        |       |        |       |        |       | -4.03                          | 2.69  |                   |       |
| 48 h Untr. Cells Ctrl.              |        |       |        |       |        |       |        |       |        |       |                                |       | -1.34             | 6.82  |

Exp. #5

|                              | WT    | error | 1 CP | error | 2 CP  | error | 1 PM | error | 2 PM  | error | H <sub>2</sub> O Transf. Ctrl. | error | Untr. Cells Ctrl. | error |
|------------------------------|-------|-------|------|-------|-------|-------|------|-------|-------|-------|--------------------------------|-------|-------------------|-------|
| 6 h mCh_mRNA                 | 11.42 | 6.58  | 0.71 | 0.48  | 13.64 | 0.87  | 1.67 | 2.22  | 13.40 | 0.32  |                                |       |                   |       |
| 6 h mCh_mRNA <sub>UTR2</sub> | -0.79 | 1.03  | 3.09 | 1.59  | -1.82 | 0.00  | 7.30 | 5.00  | 4.92  | 0.08  |                                |       |                   |       |

|                                     |        |       |       |       |        |       |        |      |        |       |  |       |      |       |      |
|-------------------------------------|--------|-------|-------|-------|--------|-------|--------|------|--------|-------|--|-------|------|-------|------|
| 6 h H <sub>2</sub> O Transf. Ctrl.  |        |       |       |       |        |       |        |      |        |       |  | -1.82 | 0.00 |       |      |
| 6 h Untr. Cells Ctrl.               |        |       |       |       |        |       |        |      |        |       |  |       |      | -1.82 | 0.00 |
| 24 h mCh_mRNA                       | 106.34 | 1.90  | 38.38 | 21.65 | 118.39 | 11.89 | 112.44 | 9.75 | 89.84  | 0.63  |  |       |      |       |      |
| 24 h mCh_mRNA <sub>UTR2</sub>       | 69.07  | 6.34  | 55.90 | 5.07  | 36.95  | 11.34 | 65.74  | 7.14 | 50.59  | 0.24  |  |       |      |       |      |
| 24 h H <sub>2</sub> O Transf. Ctrl. |        |       |       |       |        |       |        |      |        |       |  | -1.74 | 0.08 |       |      |
| 24 h Untr. Cells Ctrl.              |        |       |       |       |        |       |        |      |        |       |  |       |      | -1.82 | 0.00 |
| 48 h mCh_mRNA                       | 174.61 | 12.93 | 75.81 | 18.48 | 176.04 | 15.46 | 191.58 | 2.30 | 140.67 | 14.67 |  |       |      |       |      |
| 48 h mCh_mRNA <sub>UTR2</sub>       | 91.43  | 3.49  | 90.71 | 2.14  | 54.56  | 5.47  | 100.31 | 1.43 | 77.95  | 3.65  |  |       |      |       |      |
| 48 h H <sub>2</sub> O Transf. Ctrl. |        |       |       |       |        |       |        |      |        |       |  | -0.63 | 1.19 |       |      |
| 48 h Untr. Cells Ctrl.              |        |       |       |       |        |       |        |      |        |       |  |       |      | -1.27 | 0.56 |

Exp. #6

|                                     | WT     | error | 1 CP   | error | 2 CP   | error | 1 PM   | error | 2 PM   | error | H <sub>2</sub> O Transf. Ctrl. | error | Untr. Cells Ctrl. | error |
|-------------------------------------|--------|-------|--------|-------|--------|-------|--------|-------|--------|-------|--------------------------------|-------|-------------------|-------|
| 6 h mCh_mRNA                        | 18.63  | 1.45  | 7.05   | 3.19  | 31.96  | 2.41  | 19.69  | 2.32  | 9.56   | 9.75  |                                |       |                   |       |
| 6 h mCh_mRNA <sub>UTR2</sub>        | 9.07   | 0.58  | 10.81  | 1.74  | 8.11   | 2.51  | 8.30   | 1.35  | 8.11   | 1.93  |                                |       |                   |       |
| 6 h H <sub>2</sub> O Transf. Ctrl.  |        |       |        |       |        |       |        |       |        |       | 5.70                           | 6.08  |                   |       |
| 6 h Untr. Cells Ctrl.               |        |       |        |       |        |       |        |       |        |       |                                |       | 3.19              | 3.57  |
| 24 h mCh_mRNA                       | 131.30 | 6.76  | 57.25  | 14.00 | 166.15 | 21.72 | 138.44 | 4.44  | 103.59 | 14.58 |                                |       |                   |       |
| 24 h mCh_mRNA <sub>UTR2</sub>       | 76.07  | 2.51  | 78.01  | 3.48  | 55.42  | 6.37  | 88.34  | 0.48  | 60.44  | 3.09  |                                |       |                   |       |
| 24 h H <sub>2</sub> O Transf. Ctrl. |        |       |        |       |        |       |        |       |        |       | 3.77                           | 4.15  |                   |       |
| 24 h Untr. Cells Ctrl.              |        |       |        |       |        |       |        |       |        |       |                                |       | 4.83              | 3.48  |
| 48 h mCh_mRNA                       | 183.53 | 23.07 | 76.75  | 23.27 | 229.48 | 10.14 | 227.26 | 3.28  | 160.36 | 6.47  |                                |       |                   |       |
| 48 h mCh_mRNA <sub>UTR2</sub>       | 110.93 | 6.47  | 106.39 | 0.39  | 65.94  | 4.92  | 111.41 | 6.95  | 94.80  | 1.74  |                                |       |                   |       |
| 48 h H <sub>2</sub> O Transf. Ctrl. |        |       |        |       |        |       |        |       |        |       | 5.99                           | 5.60  |                   |       |
| 48 h Untr. Cells Ctrl.              |        |       |        |       |        |       |        |       |        |       |                                |       | 4.44              | 2.32  |

Exp. #7

|                                     | WT    | error | 1 CP  | error | 2 CP  | error | 1 PM  | error | 2 PM  | error | H <sub>2</sub> O Transf. Ctrl. | error | Untr. Cells Ctrl. | error |
|-------------------------------------|-------|-------|-------|-------|-------|-------|-------|-------|-------|-------|--------------------------------|-------|-------------------|-------|
| 6 h mCh_mRNA                        | 8.70  | 3.59  | 2.56  | 0.35  | 6.01  | 1.59  | 11.47 | 3.04  | 8.01  | 1.93  |                                |       |                   |       |
| 6 h mCh_mRNA <sub>UTR2</sub>        | 3.73  | 2.07  | 8.70  | 0.41  | 4.35  | 2.83  | 6.01  | 1.45  | 6.91  | 1.38  |                                |       |                   |       |
| 6 h H <sub>2</sub> O Transf. Ctrl.  |       |       |       |       |       |       |       |       |       |       | -3.39                          | 1.31  |                   |       |
| 6 h Untr. Cells Ctrl.               |       |       |       |       |       |       |       |       |       |       |                                |       | 1.66              | 1.93  |
| 24 h mCh_mRNA                       | 71.57 | 4.97  | 41.10 | 12.23 | 35.78 | 10.78 | 69.91 | 0.97  | 54.78 | 2.42  |                                |       |                   |       |
| 24 h mCh_mRNA <sub>UTR2</sub>       | 64.66 | 1.52  | 80.07 | 1.45  | 49.60 | 4.01  | 57.06 | 2.07  | 45.18 | 2.63  |                                |       |                   |       |
| 24 h H <sub>2</sub> O Transf. Ctrl. |       |       |       |       |       |       |       |       |       |       | -1.52                          | 1.24  |                   |       |
| 24 h Untr. Cells Ctrl.              |       |       |       |       |       |       |       |       |       |       |                                |       | 9.53              | 2.21  |
| 48 h mCh_mRNA                       | 90.71 | 0.07  | 46.56 | 9.81  | 40.28 | 0.90  | 91.47 | 4.01  | 72.26 | 6.22  |                                |       |                   |       |
| 48 h mCh_mRNA <sub>UTR2</sub>       | 66.11 | 0.35  | 88.77 | 5.87  | 48.77 | 1.52  | 67.36 | 1.04  | 47.11 | 2.76  |                                |       |                   |       |
| 48 h H <sub>2</sub> O Transf. Ctrl. |       |       |       |       |       |       |       |       |       |       | -1.66                          | 2.07  |                   |       |
| 48 h Untr. Cells Ctrl.              |       |       |       |       |       |       |       |       |       |       |                                |       | 3.52              | 2.14  |

Exp. #8

|                                     | WT    | error | 1 CP  | error | 2 CP  | error | 1 PM   | error | 2 PM  | error | H <sub>2</sub> O Transf. Ctrl. | error | Untr. Cells Ctrl. | error |
|-------------------------------------|-------|-------|-------|-------|-------|-------|--------|-------|-------|-------|--------------------------------|-------|-------------------|-------|
| 6 h mCh_mRNA                        | 9.23  | 0.89  | -1.41 | 3.80  | -3.13 | 1.19  | 1.04   | 0.45  | -2.38 | 1.64  |                                |       |                   |       |
| 6 h mCh_mRNA <sub>UTR2</sub>        | -0.37 | 1.41  | 8.26  | 0.82  | -2.53 | 0.74  | 4.91   | 1.94  | 6.18  | 0.52  |                                |       |                   |       |
| 6 h H <sub>2</sub> O Transf. Ctrl.  |       |       |       |       |       |       |        |       |       |       | 0.37                           | 0.52  |                   |       |
| 6 h Untr. Cells Ctrl.               |       |       |       |       |       |       |        |       |       |       |                                |       | -0.37             | 1.86  |
| 24 h mCh_mRNA                       | 84.35 | 2.16  | 40.13 | 10.94 | 43.11 | 9.60  | 74.75  | 0.15  | 59.93 | 6.33  |                                |       |                   |       |
| 24 h mCh_mRNA <sub>UTR2</sub>       | 61.05 | 0.30  | 81.52 | 5.58  | 45.12 | 5.06  | 55.54  | 1.94  | 40.35 | 0.45  |                                |       |                   |       |
| 24 h H <sub>2</sub> O Transf. Ctrl. |       |       |       |       |       |       |        |       |       |       | -0.37                          | 4.84  |                   |       |
| 24 h Untr. Cells Ctrl.              |       |       |       |       |       |       |        |       |       |       |                                |       | -2.61             | 2.61  |
| 48 h mCh_mRNA                       | 93.96 | 5.06  | 60.45 | 11.17 | 42.44 | 2.08  | 100.14 | 2.31  | 84.72 | 3.57  |                                |       |                   |       |
| 48 h mCh_mRNA <sub>UTR2</sub>       | 68.87 | 7.67  | 98.72 | 2.38  | 60.53 | 4.84  | 68.42  | 3.05  | 52.49 | 2.01  |                                |       |                   |       |
| 48 h H <sub>2</sub> O Transf. Ctrl. |       |       |       |       |       |       |        |       |       |       | -4.62                          | 0.60  |                   |       |
| 48 h Untr. Cells Ctrl.              |       |       |       |       |       |       |        |       |       |       |                                |       | -2.46             | 2.75  |

Exp. #9

|                                     | WT     | error | 1 CP   | error | 2 CP  | error | 1 PM   | error | 2 PM  | error | H <sub>2</sub> O Transf. Ctrl. | error | Untr. Cells Ctrl. | error |
|-------------------------------------|--------|-------|--------|-------|-------|-------|--------|-------|-------|-------|--------------------------------|-------|-------------------|-------|
| 6 h mCh_mRNA                        | 0.19   | 0.19  | 5.72   | 5.72  | 0.39  | 0.39  | 6.88   | 0.68  | 3.97  | 3.97  |                                |       |                   |       |
| 6 h mCh_mRNA <sub>UTR2</sub>        | 0.78   | 0.78  | 0.87   | 0.87  | 6.69  | 3.97  | 1.74   | 1.74  | 6.88  | 4.17  |                                |       |                   |       |
| 6 h H <sub>2</sub> O Transf. Ctrl.  |        |       |        |       |       |       |        |       |       |       | 0.00                           | 0.00  |                   |       |
| 6 h Untr. Cells Ctrl.               |        |       |        |       |       |       |        |       |       |       |                                |       | 0.00              | 0.00  |
| 24 h mCh_mRNA                       | 108.28 | 5.91  | 55.45  | 24.24 | 51.57 | 1.94  | 91.03  | 16.58 | 72.13 | 1.16  |                                |       |                   |       |
| 24 h mCh_mRNA <sub>UTR2</sub>       | 73.97  | 10.76 | 107.51 | 5.53  | 61.46 | 8.14  | 84.44  | 1.07  | 55.26 | 0.00  |                                |       |                   |       |
| 24 h H <sub>2</sub> O Transf. Ctrl. |        |       |        |       |       |       |        |       |       |       | 0.00                           | 0.00  |                   |       |
| 24 h Untr. Cells Ctrl.              |        |       |        |       |       |       |        |       |       |       |                                |       | 0.00              | 0.00  |
| 48 h mCh_mRNA                       | 107.70 | 2.04  | 57.58  | 17.84 | 52.74 | 5.04  | 108.28 | 2.42  | 82.40 | 12.99 |                                |       |                   |       |
| 48 h mCh_mRNA <sub>UTR2</sub>       | 63.40  | 5.43  | 102.66 | 3.59  | 62.53 | 0.68  | 64.27  | 13.09 | 46.92 | 2.71  |                                |       |                   |       |
| 48 h H <sub>2</sub> O Transf. Ctrl. |        |       |        |       |       |       |        |       |       |       | 0.00                           | 0.00  |                   |       |
| 48 h Untr. Cells Ctrl.              |        |       |        |       |       |       |        |       |       |       |                                |       | 0.00              | 0.00  |

Exp. #10

|                                     | WT     | error | 1 CP   | error | 2 CP  | error | 1 PM   | error | 2 PM  | error | H <sub>2</sub> O Transf. Ctrl. | error | Untr. Cells Ctrl. | error |
|-------------------------------------|--------|-------|--------|-------|-------|-------|--------|-------|-------|-------|--------------------------------|-------|-------------------|-------|
| 6 h mCh_mRNA                        | 2.01   | 1.80  | 2.65   | 2.65  | 0.64  | 0.64  | 2.01   | 2.01  | 5.41  | 5.41  |                                |       |                   |       |
| 6 h mCh_mRNA <sub>UTR2</sub>        | 2.23   | 2.23  | 5.62   | 0.95  | 5.73  | 5.73  | 2.23   | 2.23  | 5.73  | 5.73  |                                |       |                   |       |
| 6 h H <sub>2</sub> O Transf. Ctrl.  |        |       |        |       |       |       |        |       |       |       | 0.00                           | 0.00  |                   |       |
| 6 h Untr. Cells Ctrl.               |        |       |        |       |       |       |        |       |       |       |                                |       | 0.00              | 0.00  |
| 24 h mCh_mRNA                       | 123.53 | 15.37 | 63.51  | 15.16 | 77.83 | 14.42 | 141.55 | 9.44  | 98.82 | 12.09 |                                |       |                   |       |
| 24 h mCh_mRNA <sub>UTR2</sub>       | 96.49  | 13.57 | 118.12 | 5.94  | 83.24 | 2.01  | 99.88  | 7.42  | 71.78 | 4.35  |                                |       |                   |       |
| 24 h H <sub>2</sub> O Transf. Ctrl. |        |       |        |       |       |       |        |       |       |       | 0.00                           | 0.00  |                   |       |
| 24 h Untr. Cells Ctrl.              |        |       |        |       |       |       |        |       |       |       |                                |       | 0.00              | 0.00  |
| 48 h mCh_mRNA                       | 114.30 | 7.00  | 71.25  | 11.24 | 66.59 | 3.39  | 114.52 | 2.97  | 90.66 | 6.47  |                                |       |                   |       |

|                                     |       |      |        |      |       |       |       |      |       |      |      |      |      |      |
|-------------------------------------|-------|------|--------|------|-------|-------|-------|------|-------|------|------|------|------|------|
| 48 h mCh_mRNA <sup>UTR2</sup>       | 79.84 | 2.86 | 127.24 | 3.18 | 76.98 | 10.82 | 77.72 | 6.26 | 54.08 | 0.21 |      |      |      |      |
| 48 h H <sub>2</sub> O Transf. Ctrl. |       |      |        |      |       |       |       |      |       |      | 0.00 | 0.00 |      |      |
| 48 h Untr. Cells Ctrl.              |       |      |        |      |       |       |       |      |       |      |      |      | 0.00 | 0.00 |

### mCh\_mRNA + mCh\_mRNA<sup>ψ+5mC</sup>

Exp. #1

|                                     | WT     | error | 1 CP   | error | 2 CP   | error | WT<br>ψ+5mC | error | 1 CP<br>ψ+5mC | error | 2 CP<br>ψ+5mC | error | H <sub>2</sub> O<br>Transf.<br>Ctrl. | error | Untr.<br>Cells<br>Ctrl. | error |
|-------------------------------------|--------|-------|--------|-------|--------|-------|-------------|-------|---------------|-------|---------------|-------|--------------------------------------|-------|-------------------------|-------|
| 6 h mCh_mRNA                        | 16.44  | 1.49  | 10.68  | 2.78  | 19.96  | 1.81  | 34.16       | 3.42  | 17.51         | 0.43  | 19.22         | 1.71  |                                      |       |                         |       |
| 6 h H <sub>2</sub> O Transf. Ctrl.  |        |       |        |       |        |       |             |       |               |       |               |       | -0.85                                | 6.19  |                         |       |
| 6 h Untr. Cells Ctrl.               |        |       |        |       |        |       |             |       |               |       |               |       |                                      |       | 2.03                    | 2.46  |
| 24 h mCh_mRNA                       | 198.57 | 22.85 | 109.85 | 2.46  | 162.38 | 8.43  | 399.05      | 13.88 | 123.41        | 2.78  | 184.37        | 4.16  |                                      |       |                         |       |
| 24 h H <sub>2</sub> O Transf. Ctrl. |        |       |        |       |        |       |             |       |               |       |               |       | -6.83                                | 2.56  |                         |       |
| 24 h Untr. Cells Ctrl.              |        |       |        |       |        |       |             |       |               |       |               |       |                                      |       | 3.52                    | 0.32  |
| 48 h mCh_mRNA                       | 287.49 | 16.12 | 161.95 | 6.30  | 247.14 | 0.11  | 529.19      | 3.31  | 184.69        | 2.14  | 235.18        | 1.39  |                                      |       |                         |       |
| 48 h H <sub>2</sub> O Transf. Ctrl. |        |       |        |       |        |       |             |       |               |       |               |       | -0.96                                | 1.39  |                         |       |
| 48 h Untr. Cells Ctrl.              |        |       |        |       |        |       |             |       |               |       |               |       |                                      |       | -0.85                   | 1.07  |

Exp. #2

|                                     | WT     | error | 1 CP   | error | 2 CP   | error | WT<br>ψ+5mC | error | 1 CP<br>ψ+5mC | error | 2 CP<br>ψ+5mC | error | H <sub>2</sub> O<br>Transf.<br>Ctrl. | error | Untr.<br>Cells<br>Ctrl. | error |
|-------------------------------------|--------|-------|--------|-------|--------|-------|-------------|-------|---------------|-------|---------------|-------|--------------------------------------|-------|-------------------------|-------|
| 6 h mCh_mRNA                        | 19.79  | 2.08  | 16.99  | 0.36  | 31.63  | 2.53  | 43.38       | 1.63  | 22.05         | 2.89  | 50.88         | 11.66 |                                      |       |                         |       |
| 6 h H <sub>2</sub> O Transf. Ctrl.  |        |       |        |       |        |       |             |       |               |       |               |       | 1.63                                 | 1.63  |                         |       |
| 6 h Untr. Cells Ctrl.               |        |       |        |       |        |       |             |       |               |       |               |       |                                      |       | 0.18                    | 0.18  |
| 24 h mCh_mRNA                       | 242.49 | 19.07 | 127.70 | 7.14  | 248.36 | 5.60  | 318.67      | 14.82 | 221.43        | 1.63  | 330.97        | 6.87  |                                      |       |                         |       |
| 24 h H <sub>2</sub> O Transf. Ctrl. |        |       |        |       |        |       |             |       |               |       |               |       | 2.98                                 | 1.90  |                         |       |
| 24 h Untr. Cells Ctrl.              |        |       |        |       |        |       |             |       |               |       |               |       |                                      |       | 3.25                    | 3.25  |
| 48 h mCh_mRNA                       | 388.27 | 38.32 | 218.72 | 1.63  | 381.31 | 41.48 | 509.46      | 18.53 | 382.48        | 44.83 | 474.31        | 27.66 |                                      |       |                         |       |
| 48 h H <sub>2</sub> O Transf. Ctrl. |        |       |        |       |        |       |             |       |               |       |               |       | 3.98                                 | 0.54  |                         |       |
| 48 h Untr. Cells Ctrl.              |        |       |        |       |        |       |             |       |               |       |               |       |                                      |       | 1.17                    | 1.17  |

Exp. #3

|                                     | WT     | error | 1 CP   | error | 2 CP   | error | WT<br>ψ+5mC | error | 1 CP<br>ψ+5mC | error | 2 CP<br>ψ+5mC | error  | H <sub>2</sub> O<br>Transf.<br>Ctrl. | error | Untr.<br>Cells<br>Ctrl. | error |
|-------------------------------------|--------|-------|--------|-------|--------|-------|-------------|-------|---------------|-------|---------------|--------|--------------------------------------|-------|-------------------------|-------|
| 6 h mCh_mRNA                        | 9.65   | 9.65  | 2.83   | 2.83  | 11.85  | 4.09  | 16.36       | 2.73  | 14.57         | 1.15  | 34.07         | 3.25   |                                      |       |                         |       |
| 6 h H <sub>2</sub> O Transf. Ctrl.  |        |       |        |       |        |       |             |       |               |       |               |        | 0.00                                 | 0.00  |                         |       |
| 6 h Untr. Cells Ctrl.               |        |       |        |       |        |       |             |       |               |       |               |        |                                      |       | 0.00                    | 0.00  |
| 24 h mCh_mRNA                       | 148.98 | 64.27 | 102.43 | 11.85 | 241.14 | 1.89  | 312.32      | 44.98 | 226.25        | 0.21  | 348.91        | 4.40   |                                      |       |                         |       |
| 24 h H <sub>2</sub> O Transf. Ctrl. |        |       |        |       |        |       |             |       |               |       |               |        | 0.00                                 | 0.00  |                         |       |
| 24 h Untr. Cells Ctrl.              |        |       |        |       |        |       |             |       |               |       |               |        |                                      |       | 0.00                    | 0.00  |
| 48 h mCh_mRNA                       | 215.87 | 91.32 | 168.38 | 1.89  | 302.15 | 7.55  | 368.94      | 15.20 | 319.24        | 3.88  | 226.98        | 157.79 |                                      |       |                         |       |

|                                     |  |  |  |  |  |  |  |  |  |  |  |  |  |      |      |      |      |
|-------------------------------------|--|--|--|--|--|--|--|--|--|--|--|--|--|------|------|------|------|
| 48 h H <sub>2</sub> O Transf. Ctrl. |  |  |  |  |  |  |  |  |  |  |  |  |  | 0.00 | 0.00 |      |      |
| 48 h Untr. Cells Ctrl.              |  |  |  |  |  |  |  |  |  |  |  |  |  |      |      | 0.00 | 0.00 |

Exp. #4

|                                     | WT     | error | 1 CP   | error | 2 CP   | error | WT $\Psi+5mC$ | error | 1 CP $\Psi+5mC$ | error | 2 CP $\Psi+5mC$ | error | H <sub>2</sub> O Transf. Ctrl. | error | Untr. Cells Ctrl. | error |
|-------------------------------------|--------|-------|--------|-------|--------|-------|---------------|-------|-----------------|-------|-----------------|-------|--------------------------------|-------|-------------------|-------|
| 6 h mCh_mRNA                        | 4.86   | 1.30  | 7.85   | 4.45  | 15.79  | 2.35  | 24.94         | 3.72  | 15.30           | 2.67  | 33.44           | 6.40  |                                |       |                   |       |
| 6 h H <sub>2</sub> O Transf. Ctrl.  |        |       |        |       |        |       |               |       |                 |       |                 |       | 0.00                           | 0.00  |                   |       |
| 6 h Untr. Cells Ctrl.               |        |       |        |       |        |       |               |       |                 |       |                 |       |                                |       | 4.21              | 4.21  |
| 24 h mCh_mRNA                       | 86.95  | 36.27 | 77.72  | 6.64  | 164.75 | 3.00  | 175.60        | 0.40  | 157.95          | 10.77 | 244.42          | 25.50 |                                |       |                   |       |
| 24 h H <sub>2</sub> O Transf. Ctrl. |        |       |        |       |        |       |               |       |                 |       |                 |       | 0.40                           | 0.40  |                   |       |
| 24 h Untr. Cells Ctrl.              |        |       |        |       |        |       |               |       |                 |       |                 |       |                                |       | 1.21              | 1.21  |
| 48 h mCh_mRNA                       | 153.26 | 71.65 | 149.53 | 4.29  | 225.23 | 31.25 | 261.82        | 27.69 | 237.54          | 4.05  | 317.12          | 15.63 |                                |       |                   |       |
| 48 h H <sub>2</sub> O Transf. Ctrl. |        |       |        |       |        |       |               |       |                 |       |                 |       | 4.45                           | 4.45  |                   |       |
| 48 h Untr. Cells Ctrl.              |        |       |        |       |        |       |               |       |                 |       |                 |       |                                |       | 0.00              | 0.00  |

Exp. #5

|                                     | WT     | error | 1 CP   | error | 2 CP   | error | WT $\Psi+5mC$ | error | 1 CP $\Psi+5mC$ | error | 2 CP $\Psi+5mC$ | error | H <sub>2</sub> O Transf. Ctrl. | error | Untr. Cells Ctrl. | error |
|-------------------------------------|--------|-------|--------|-------|--------|-------|---------------|-------|-----------------|-------|-----------------|-------|--------------------------------|-------|-------------------|-------|
| 6 h mCh_mRNA                        | 15.85  | 3.10  | 9.85   | 1.78  | 19.70  | 0.19  | 18.29         | 2.34  | 20.54           | 5.72  | 27.86           | 4.22  |                                |       |                   |       |
| 6 h H <sub>2</sub> O Transf. Ctrl.  |        |       |        |       |        |       |               |       |                 |       |                 |       | 0.00                           | 0.00  |                   |       |
| 6 h Untr. Cells Ctrl.               |        |       |        |       |        |       |               |       |                 |       |                 |       |                                |       | 0.00              | 0.00  |
| 24 h mCh_mRNA                       | 110.30 | 15.94 | 47.55  | 7.03  | 182.15 | 3.94  | 190.31        | 18.66 | 122.87          | 2.25  | 185.24          | 6.85  |                                |       |                   |       |
| 24 h H <sub>2</sub> O Transf. Ctrl. |        |       |        |       |        |       |               |       |                 |       |                 |       | 1.88                           | 1.88  |                   |       |
| 24 h Untr. Cells Ctrl.              |        |       |        |       |        |       |               |       |                 |       |                 |       |                                |       | 0.00              | 0.00  |
| 48 h mCh_mRNA                       | 129.34 | 75.50 | 109.17 | 6.38  | 268.25 | 5.63  | 300.98        | 15.85 | 181.40          | 1.50  | 280.16          | 8.35  |                                |       |                   |       |
| 48 h H <sub>2</sub> O Transf. Ctrl. |        |       |        |       |        |       |               |       |                 |       |                 |       | 0.00                           | 0.00  |                   |       |
| 48 h Untr. Cells Ctrl.              |        |       |        |       |        |       |               |       |                 |       |                 |       |                                |       | 0.00              | 0.00  |

Exp. #6

|                                     | WT     | error | 1 CP   | error | 2 CP   | error | WT $\Psi+5mC$ | error | 1 CP $\Psi+5mC$ | error | 2 CP $\Psi+5mC$ | error | H <sub>2</sub> O Transf. Ctrl. | error | Untr. Cells Ctrl. | error |
|-------------------------------------|--------|-------|--------|-------|--------|-------|---------------|-------|-----------------|-------|-----------------|-------|--------------------------------|-------|-------------------|-------|
| 6 h mCh_mRNA                        | 16.18  | 0.09  | 6.92   | 1.12  | 16.56  | 4.96  | 15.53         | 3.93  | 10.95           | 2.15  | 19.18           | 4.02  |                                |       |                   |       |
| 6 h H <sub>2</sub> O Transf. Ctrl.  |        |       |        |       |        |       |               |       |                 |       |                 |       | -0.56                          | 0.00  |                   |       |
| 6 h Untr. Cells Ctrl.               |        |       |        |       |        |       |               |       |                 |       |                 |       |                                |       | -0.56             | 0.00  |
| 24 h mCh_mRNA                       | 108.99 | 11.51 | 64.37  | 3.74  | 206.66 | 6.46  | 206.75        | 6.92  | 130.41          | 2.43  | 223.41          | 8.42  |                                |       |                   |       |
| 24 h H <sub>2</sub> O Transf. Ctrl. |        |       |        |       |        |       |               |       |                 |       |                 |       | -0.56                          | 0.00  |                   |       |
| 24 h Untr. Cells Ctrl.              |        |       |        |       |        |       |               |       |                 |       |                 |       |                                |       | -0.37             | 0.19  |
| 48 h mCh_mRNA                       | 240.62 | 33.49 | 142.67 | 4.40  | 313.69 | 13.38 | 345.78        | 26.38 | 218.54          | 0.75  | 283.38          | 12.44 |                                |       |                   |       |
| 48 h H <sub>2</sub> O Transf. Ctrl. |        |       |        |       |        |       |               |       |                 |       |                 |       | -0.56                          | 0.00  |                   |       |
| 48 h Untr. Cells Ctrl.              |        |       |        |       |        |       |               |       |                 |       |                 |       |                                |       | -0.56             | 0.00  |



## Exp. #7

|                                        | WT     | error | 1 CP   | error | 2 CP   | error | WT<br>$\Psi+5mC$ | error | 1 CP<br>$\Psi+5mC$ | error | 2 CP<br>$\Psi+5mC$ | error | H <sub>2</sub> O<br>Transf.<br>Ctrl. | error | Untr.<br>Cells<br>Ctrl. | error |
|----------------------------------------|--------|-------|--------|-------|--------|-------|------------------|-------|--------------------|-------|--------------------|-------|--------------------------------------|-------|-------------------------|-------|
| 6 h<br>mCh_mRNA                        | 4.52   | 5.22  | 9.80   | 1.07  | 5.84   | 0.25  | 43.04            | 0.13  | 32.80              | 0.19  | 31.10              | 3.27  |                                      |       |                         |       |
| 6 h H <sub>2</sub> O<br>Transf. Ctrl.  |        |       |        |       |        |       |                  |       |                    |       |                    |       | -6.10                                | 1.76  |                         |       |
| 6 h Untr.<br>Cells Ctrl.               |        |       |        |       |        |       |                  |       |                    |       |                    |       |                                      |       | -0.38                   | 0.57  |
| 24 h<br>mCh_mRNA                       | 84.26  | 10.93 | 97.27  | 0.19  | 107.45 | 6.85  | 350.24           | 19.42 | 246.82             | 14.14 | 236.45             | 11.31 |                                      |       |                         |       |
| 24 h H <sub>2</sub> O<br>Transf. Ctrl. |        |       |        |       |        |       |                  |       |                    |       |                    |       | -1.70                                | 1.89  |                         |       |
| 24 h Untr.<br>Cells Ctrl.              |        |       |        |       |        |       |                  |       |                    |       |                    |       |                                      |       | -1.19                   | 0.38  |
| 48 h<br>mCh_mRNA                       | 136.16 | 20.61 | 175.94 | 2.95  | 172.36 | 2.14  | 535.92           | 7.54  | 355.33             | 0.50  | 359.54             | 8.36  |                                      |       |                         |       |
| 48 h H <sub>2</sub> O<br>Transf. Ctrl. |        |       |        |       |        |       |                  |       |                    |       |                    |       | 1.01                                 | 1.45  |                         |       |
| 48 h Untr.<br>Cells Ctrl.              |        |       |        |       |        |       |                  |       |                    |       |                    |       |                                      |       | -2.20                   | 0.13  |

## Exp. #8

|                                        | WT     | error | 1 CP   | error | 2 CP   | error | WT<br>$\Psi+5mC$ | error | 1 CP<br>$\Psi+5mC$ | error | 2 CP<br>$\Psi+5mC$ | error | H <sub>2</sub> O<br>Transf.<br>Ctrl. | error | Untr.<br>Cells<br>Ctrl. | error |
|----------------------------------------|--------|-------|--------|-------|--------|-------|------------------|-------|--------------------|-------|--------------------|-------|--------------------------------------|-------|-------------------------|-------|
| 6 h<br>mCh_mRNA                        | 8.71   | 1.79  | 12.78  | 3.74  | 9.52   | 4.23  | 47.45            | 0.65  | 37.19              | 0.33  | 42.32              | 0.57  |                                      |       |                         |       |
| 6 h H <sub>2</sub> O<br>Transf. Ctrl.  |        |       |        |       |        |       |                  |       |                    |       |                    |       | -0.24                                | 0.16  |                         |       |
| 6 h Untr.<br>Cells Ctrl.               |        |       |        |       |        |       |                  |       |                    |       |                    |       |                                      |       | -0.41                   | 0.00  |
| 24 h<br>mCh_mRNA                       | 107.02 | 11.07 | 124.11 | 5.05  | 126.96 | 1.87  | 433.38           | 24.90 | 290.63             | 14.97 | 302.35             | 16.44 |                                      |       |                         |       |
| 24 h H <sub>2</sub> O<br>Transf. Ctrl. |        |       |        |       |        |       |                  |       |                    |       |                    |       | 0.81                                 | 1.22  |                         |       |
| 24 h Untr.<br>Cells Ctrl.              |        |       |        |       |        |       |                  |       |                    |       |                    |       |                                      |       | 0.49                    | 0.57  |
| 48 h<br>mCh_mRNA                       | 181.90 | 24.42 | 217.54 | 8.30  | 214.78 | 0.16  | 667.44           | 15.79 | 438.83             | 2.69  | 440.95             | 6.59  |                                      |       |                         |       |
| 48 h H <sub>2</sub> O<br>Transf. Ctrl. |        |       |        |       |        |       |                  |       |                    |       |                    |       | 0.65                                 | 1.06  |                         |       |
| 48 h Untr.<br>Cells Ctrl.              |        |       |        |       |        |       |                  |       |                    |       |                    |       |                                      |       | 1.95                    | 2.36  |

## Exp. #9

|                                        | WT     | error | 1 CP   | error | 2 CP   | error | WT<br>$\Psi+5mC$ | error | 1 CP<br>$\Psi+5mC$ | error | 2 CP<br>$\Psi+5mC$ | error | H <sub>2</sub> O<br>Transf.<br>Ctrl. | error | Untr.<br>Cells<br>Ctrl. | error |
|----------------------------------------|--------|-------|--------|-------|--------|-------|------------------|-------|--------------------|-------|--------------------|-------|--------------------------------------|-------|-------------------------|-------|
| 6 h<br>mCh_mRNA                        | 4.68   | 1.61  | 14.54  | 2.41  | 10.01  | 0.51  | 14.25            | 0.51  | 28.57              | 5.19  | 33.32              | 0.29  |                                      |       |                         |       |
| 6 h H <sub>2</sub> O<br>Transf. Ctrl.  |        |       |        |       |        |       |                  |       |                    |       |                    |       | 5.55                                 | 3.22  |                         |       |
| 6 h Untr.<br>Cells Ctrl.               |        |       |        |       |        |       |                  |       |                    |       |                    |       |                                      |       | -2.34                   | 0.00  |
| 24 h<br>mCh_mRNA                       | 68.33  | 29.16 | 122.70 | 4.17  | 139.88 | 12.28 | 102.60           | 1.32  | 149.81             | 16.52 | 288.45             | 15.57 |                                      |       |                         |       |
| 24 h H <sub>2</sub> O<br>Transf. Ctrl. |        |       |        |       |        |       |                  |       |                    |       |                    |       | -1.02                                | 1.32  |                         |       |
| 24 h Untr.<br>Cells Ctrl.              |        |       |        |       |        |       |                  |       |                    |       |                    |       |                                      |       | -2.34                   | 0.00  |
| 48 h<br>mCh_mRNA                       | 107.72 | 56.13 | 183.80 | 0.07  | 165.67 | 8.55  | 159.68           | 4.90  | 328.06             | 38.07 | 335.00             | 24.70 |                                      |       |                         |       |
| 48 h H <sub>2</sub> O<br>Transf. Ctrl. |        |       |        |       |        |       |                  |       |                    |       |                    |       | 4.17                                 | 3.87  |                         |       |
| 48 h Untr.<br>Cells Ctrl.              |        |       |        |       |        |       |                  |       |                    |       |                    |       |                                      |       | -2.34                   | 0.00  |

## Exp. #10

|                 | WT   | error | 1 CP  | error | 2 CP  | error | WT<br>$\Psi+5mC$ | error | 1 CP<br>$\Psi+5mC$ | error | 2 CP<br>$\Psi+5mC$ | error | H <sub>2</sub> O<br>Transf.<br>Ctrl. | error | Untr.<br>Cells<br>Ctrl. | error |
|-----------------|------|-------|-------|-------|-------|-------|------------------|-------|--------------------|-------|--------------------|-------|--------------------------------------|-------|-------------------------|-------|
| 6 h<br>mCh_mRNA | 5.82 | 4.04  | 11.15 | 2.26  | 11.50 | 3.97  | 13.14            | 3.01  | 28.46              | 0.68  | 32.91              | 0.34  |                                      |       |                         |       |

|                                     |        |       |        |      |        |       |        |      |        |       |        |      |  |       |      |       |      |
|-------------------------------------|--------|-------|--------|------|--------|-------|--------|------|--------|-------|--------|------|--|-------|------|-------|------|
| 6 h H <sub>2</sub> O Transf. Ctrl.  |        |       |        |      |        |       |        |      |        |       |        |      |  | 4.31  | 5.95 |       |      |
| 6 h Untr. Cells Ctrl.               |        |       |        |      |        |       |        |      |        |       |        |      |  |       |      | -0.89 | 3.22 |
| 24 h mCh_mRNA                       | 69.25  | 31.34 | 108.80 | 3.42 | 121.52 | 13.27 | 90.59  | 2.87 | 143.69 | 12.04 | 251.46 | 9.37 |  |       |      |       |      |
| 24 h H <sub>2</sub> O Transf. Ctrl. |        |       |        |      |        |       |        |      |        |       |        |      |  | -0.89 | 2.94 |       |      |
| 24 h Untr. Cells Ctrl.              |        |       |        |      |        |       |        |      |        |       |        |      |  |       |      | 1.16  | 0.21 |
| 48 h mCh_mRNA                       | 102.57 | 49.06 | 168.67 | 0.48 | 149.37 | 0.75  | 143.42 | 1.51 | 289.44 | 29.56 | 306.82 | 2.87 |  |       |      |       |      |
| 48 h H <sub>2</sub> O Transf. Ctrl. |        |       |        |      |        |       |        |      |        |       |        |      |  | -1.85 | 1.71 |       |      |
| 48 h Untr. Cells Ctrl.              |        |       |        |      |        |       |        |      |        |       |        |      |  |       |      | -2.12 | 6.09 |

### Merged data from both data sets

|                                     | 6 h   | error | 24 h   | error | 48 h   | error |
|-------------------------------------|-------|-------|--------|-------|--------|-------|
| mCh_mRNA <sup>WT</sup>              | 9.18  | 0.78  | 118.66 | 4.86  | 172.70 | 8.64  |
| mCh_mRNA <sup>1 CP</sup>            | 5.71  | 0.88  | 75.01  | 2.78  | 119.56 | 2.66  |
| mCh_mRNA <sup>2 CP</sup>            | 12.17 | 0.59  | 130.80 | 2.12  | 182.91 | 3.11  |
| mCh_mRNA <sup>WT, Ψ+5mC</sup>       | 27.05 | 0.81  | 257.95 | 6.20  | 382.26 | 5.13  |
| mCh_mRNA <sup>1 CP, Ψ+5mC</sup>     | 22.80 | 0.91  | 181.33 | 3.13  | 293.55 | 6.62  |
| mCh_mRNA <sup>2 CP, Ψ+5mC</sup>     | 32.43 | 1.53  | 259.60 | 3.98  | 325.94 | 16.39 |
| mCh_mRNA <sup>1 PM</sup>            | 6.50  | 1.21  | 110.69 | 2.53  | 152.19 | 3.78  |
| mCh_mRNA <sup>2 PM</sup>            | 3.64  | 1.51  | 83.68  | 2.40  | 117.04 | 3.24  |
| mCh_mRNA <sup>WT UTR 2</sup>        | 3.34  | 0.46  | 71.81  | 0.87  | 87.21  | 0.61  |
| mCh_mRNA <sup>1 CP UTR 2</sup>      | 3.80  | 0.35  | 78.99  | 0.83  | 97.45  | 0.64  |
| mCh_mRNA <sup>2 CP UTR 2</sup>      | 1.57  | 0.51  | 53.00  | 0.76  | 67.76  | 0.77  |
| mCh_mRNA <sup>1 PM UTR 2</sup>      | 6.19  | 1.29  | 73.78  | 1.79  | 89.24  | 2.30  |
| mCh_mRNA <sup>2 PM UTR 2</sup>      | 5.33  | 0.87  | 56.46  | 1.39  | 68.75  | 3.01  |
| H <sub>2</sub> O Transfection Ctrl. | 0.10  | 0.69  | -1.08  | 0.54  | 0.09   | 0.52  |
| Untreated Cells Ctrl.               | -0.34 | 0.60  | 0.30   | 0.34  | -0.28  | 0.63  |

### Normalized to mCh\_mRNA<sup>WT</sup>

|                                 | 6 h  | error | 24 h  | error | 48 h  | error |
|---------------------------------|------|-------|-------|-------|-------|-------|
| mCh_mRNA <sup>WT</sup>          | 1.00 | 0.08  | 12.92 | 0.53  | 18.81 | 0.94  |
| mCh_mRNA <sup>1 CP</sup>        | 0.62 | 0.10  | 8.17  | 0.30  | 13.02 | 0.29  |
| mCh_mRNA <sup>2 CP</sup>        | 1.33 | 0.06  | 14.24 | 0.23  | 19.92 | 0.34  |
| mCh_mRNA <sup>WT, Ψ+5mC</sup>   | 2.95 | 0.09  | 28.09 | 0.67  | 41.63 | 0.56  |
| mCh_mRNA <sup>1 CP, Ψ+5mC</sup> | 2.48 | 0.10  | 19.75 | 0.34  | 31.97 | 0.72  |
| mCh_mRNA <sup>2 CP, Ψ+5mC</sup> | 3.53 | 0.17  | 28.27 | 0.43  | 35.50 | 1.78  |
| mCh_mRNA <sup>1 PM</sup>        | 0.71 | 0.13  | 12.05 | 0.28  | 16.57 | 0.41  |
| mCh_mRNA <sup>2 PM</sup>        | 0.40 | 0.16  | 9.11  | 0.26  | 12.75 | 0.35  |
| mCh_mRNA <sup>WT UTR 2</sup>    | 0.36 | 0.05  | 7.82  | 0.10  | 9.50  | 0.07  |
| mCh_mRNA <sup>1 CP UTR 2</sup>  | 0.41 | 0.04  | 8.60  | 0.09  | 10.61 | 0.07  |
| mCh_mRNA <sup>2 CP UTR 2</sup>  | 0.17 | 0.06  | 5.77  | 0.08  | 7.38  | 0.08  |
| mCh_mRNA <sup>1 PM UTR 2</sup>  | 0.67 | 0.14  | 8.04  | 0.19  | 9.72  | 0.25  |

|                                                |       |      |       |      |       |      |
|------------------------------------------------|-------|------|-------|------|-------|------|
| <b>mCh_mRNA<sup>2 PM</sup><sub>UTR 2</sub></b> | 0.58  | 0.10 | 6.15  | 0.15 | 7.49  | 0.33 |
| <b>H<sub>2</sub>O Transfection Ctrl.</b>       | 0.01  | 0.07 | -0.12 | 0.06 | 0.01  | 0.06 |
| <b>Untreated Cells Ctrl.</b>                   | -0.04 | 0.07 | 0.03  | 0.04 | -0.03 | 0.07 |

### Ratios

| <b>Time point [h]</b> | <b>mCh_mRNA<sup>WT, <math>\Psi+5mC</math></sup> / mCh_mRNA<sup>WT</sup></b> | <b>error</b> | <b>mCh_mRNA<sup>2 CP, <math>\Psi+5mC</math></sup> / mCh_mRNA<sup>WT</sup></b> | <b>error</b> |
|-----------------------|-----------------------------------------------------------------------------|--------------|-------------------------------------------------------------------------------|--------------|
| <b>6</b>              | 2.95                                                                        | 0.26         | 3.53                                                                          | 0.34         |
| <b>24</b>             | 2.17                                                                        | 0.10         | 2.19                                                                          | 0.10         |
| <b>48</b>             | 2.21                                                                        | 0.11         | 1.89                                                                          | 0.13         |

## MT cell viability assay

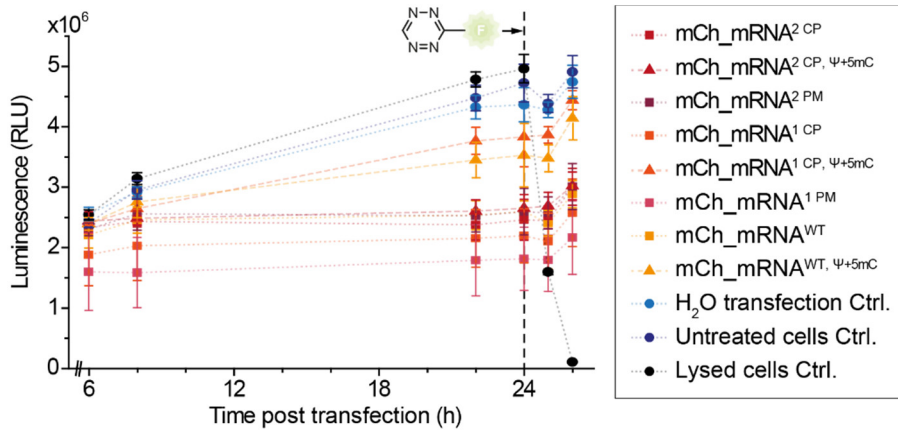

Supplementary Figure 31. Cell viability assay of mCh\_mRNA sequences. Subset shown in Figure 5 of the main text.

### Raw Data of Luminescence (RLU)

| Time [h]                              | 6       | 8       | 22      | 24      | 25      | 26      |
|---------------------------------------|---------|---------|---------|---------|---------|---------|
| mCh<br>mRNA <sup>2</sup> CP           | 2432900 | 2554490 | 2685350 | 2725420 | 2643830 | 3255060 |
|                                       | 2409160 | 2454330 | 2416200 | 2704730 | 2627880 | 3233770 |
|                                       | 2215920 | 2334510 | 2075270 | 1997020 | 2117430 | 2593080 |
| mCh<br>mRNA <sup>1</sup> CP           | 1174660 | 1244560 | 1518930 | 1614330 | 1498030 | 1851460 |
|                                       | 2209430 | 2340810 | 2635460 | 2690920 | 2606540 | 3198450 |
|                                       | 2313670 | 2557930 | 2356800 | 2328160 | 2263850 | 2738030 |
| mCh<br>mRNA <sup>WT</sup>             | 1919750 | 2165110 | 2217530 | 2378180 | 2129170 | 2592010 |
|                                       | 2374180 | 2623030 | 2778790 | 2795050 | 2621650 | 3105210 |
|                                       | 2375480 | 2632540 | 2659840 | 2673440 | 2511330 | 3019900 |
| mCh<br>mRNA <sup>1</sup> PM           | 811560  | 867730  | 982170  | 1093620 | 1086630 | 1333650 |
|                                       | 1662180 | 1650180 | 2121930 | 2190380 | 2079090 | 2522180 |
|                                       | 2375030 | 2292610 | 2313820 | 2208820 | 2273910 | 2703040 |
| mCh<br>mRNA <sup>2</sup> PM           | 2465640 | 2948460 | 2843250 | 3069840 | 2907870 | 3503480 |
|                                       | 2267220 | 2469010 | 2588280 | 2641080 | 2614210 | 3016440 |
|                                       | 2225750 | 2308760 | 2195970 | 2126190 | 2256640 | 2572390 |
| mCh<br>mRNA <sup>2</sup> CP,<br>Ψ+5mC | 2378570 | 2421430 | 2494960 | 2693910 | 2531250 | 2891690 |
|                                       | 2673200 | 2673550 | 2888130 | 2934110 | 3023130 | 3366430 |
|                                       | 2315690 | 2415560 | 2473890 | 2379340 | 2568100 | 2872290 |
| mCh<br>mRNA <sup>1</sup> CP,<br>Ψ+5mC | 2454960 | 2895930 | 3934790 | 4433470 | 3916380 | 4539120 |
|                                       | 2396240 | 2719690 | 3944030 | 3894430 | 4032920 | 4598720 |
|                                       | 2394170 | 2368090 | 3467600 | 3222260 | 3701690 | 4242190 |
| mRNA <sup>WT</sup> ,<br>Ψ+5mC         | 2425740 | 3039910 | 3654140 | 4121950 | 3681070 | 4491290 |
|                                       | 2531230 | 2851830 | 3692630 | 3662330 | 3625490 | 4330610 |
|                                       | 2272830 | 2423550 | 3053540 | 2851040 | 3180800 | 3664090 |
| H <sub>2</sub> O Ctrl.                | 2665420 | 2951370 | 4445670 | 4552470 | 4314760 | 4921590 |
|                                       | 2630750 | 3039010 | 4510970 | 4609090 | 4443640 | 4992870 |
|                                       | 2414720 | 2826700 | 4067910 | 3980930 | 4136510 | 4375440 |
| Untreated<br>Cells Ctrl.              | 2494110 | 3062580 | 4509860 | 4963310 | 4550240 | 5130990 |
|                                       | 2434950 | 3093910 | 4744170 | 4961430 | 4458690 | 5104830 |
|                                       | 2320500 | 2757400 | 4225280 | 4297340 | 4199930 | 4548590 |
| Lysed<br>Cells Ctrl.                  | 2456100 | 3169160 | 4836790 | 5141860 | 1665630 | 128210  |
|                                       | 2659520 | 3270530 | 4929130 | 5146020 | 1627770 | 137680  |
|                                       | 2552340 | 3029590 | 4627390 | 4643430 | 1558040 | 120080  |
| Medium<br>Only                        | 13060   | 14430   | 13740   | 14260   | 13840   | 17180   |
|                                       | 14230   | 16360   | 14560   | 15280   | 15720   | 19340   |
|                                       | 16280   | 16350   | 16070   | 16170   | 17570   | 20180   |

|  |       |       |       |       |       |       |
|--|-------|-------|-------|-------|-------|-------|
|  | 16420 | 16480 | 16710 | 16790 | 17800 | 21280 |
|  | 17400 | 16640 | 16940 | 16600 | 19010 | 21020 |

### Background Subtracted Mean Values of Luminescence (RLU) = Data points

| Time [h] | mCh mRNA <sup>2</sup> CP | mCh mRNA <sup>1</sup> CP | mCh mRNA <sup>WT</sup> | mCh mRNA <sup>1</sup> PM | mCh mRNA <sup>2</sup> PM | mCh mRNA <sup>2</sup> CP, $\Psi$ +5mC | mCh mRNA <sup>1</sup> CP, $\Psi$ +5mC | mRNA <sup>WT</sup> , $\Psi$ +5mC | H <sub>2</sub> O Ctrl. | Untreated Cells Ctrl. | Lysed Cells Ctrl. |
|----------|--------------------------|--------------------------|------------------------|--------------------------|--------------------------|---------------------------------------|---------------------------------------|----------------------------------|------------------------|-----------------------|-------------------|
| 6        | 2337182                  | 1883775,33               | 2207658,67             | 1600778,67               | 2304058,67               | 2440342                               | 2399645,33                            | 2394455,33                       | 2554818,67             | 2401042               | 2540508,67        |
| 8        | 2431724,67               | 2031714,67               | 2457508                | 1587454,67               | 2559358                  | 2487461,33                            | 2645184,67                            | 2755711,33                       | 2922974,67             | 2955244,67            | 3140374,67        |
| 22       | 2376669,33               | 2154792,67               | 2536449,33             | 1790369,33               | 2526896                  | 2603389,33                            | 3766536                               | 3451166                          | 4325912,67             | 4477499,33            | 4782166           |
| 24       | 2459903,33               | 2195316,67               | 2599736,67             | 1815120                  | 2596550                  | 2653300                               | 3834233,33                            | 3529286,67                       | 4365010                | 4724873,33            | 4961283,33        |
| 25       | 2446258,67               | 2106018,67               | 2403928,67             | 1796422                  | 2576118,67               | 2690705,33                            | 3866875,33                            | 3478998,67                       | 4281515,33             | 4386165,33            | 1600358,67        |
| 26       | 3007503,33               | 2576180                  | 2885906,67             | 2166490                  | 3010970                  | 3023670                               | 4440210                               | 4142196,67                       | 4743500                | 4908336,67            | 108856,667        |

### Standard Deviation of Luminescence (RLU) = Error bars

| Time [h] | mCh mRNA <sup>2</sup> CP | mCh mRNA <sup>1</sup> CP | mCh mRNA <sup>WT</sup> | mCh mRNA <sup>1</sup> PM | mCh mRNA <sup>2</sup> PM | mCh mRNA <sup>2</sup> CP, $\Psi$ +5mC | mCh mRNA <sup>1</sup> CP, $\Psi$ +5mC | mRNA <sup>WT</sup> , $\Psi$ +5mC | H <sub>2</sub> O Ctrl. | Untreated Cells Ctrl. | Lysed Cells Ctrl. |
|----------|--------------------------|--------------------------|------------------------|--------------------------|--------------------------|---------------------------------------|---------------------------------------|----------------------------------|------------------------|-----------------------|-------------------|
| 6        | 97174,3025               | 514129,114               | 214527,426             | 639109,445               | 104688,676               | 155839,708                            | 28181,4506                            | 106081,818                       | 110916,114             | 72064,1228            | 83085,8902        |
| 8        | 89925,9315               | 574828,082               | 218141,639             | 582640,286               | 271777,78                | 120257,959                            | 219417,958                            | 257918,483                       | 87113,5368             | 151787,637            | 98774,5724        |
| 22       | 249638,092               | 474495,846               | 241476,943             | 587760,945               | 266226,352               | 190502,66                             | 222445,354                            | 292619,941                       | 195297,173             | 212167,068            | 126237,018        |
| 24       | 338599,744               | 447237,709               | 175039,061             | 521418,319               | 385778,027               | 227161,244                            | 495469,059                            | 525426,201                       | 283715,19              | 313499,088            | 235948,789        |
| 25       | 244474,621               | 463406,604               | 211016,934             | 519889,463               | 266289,945               | 223695,268                            | 137188,711                            | 223882,014                       | 125924,119             | 148344,657            | 44561,1448        |
| 26       | 307165,258               | 559004,572               | 224534,553             | 607411,893               | 380250,934               | 228504,502                            | 155932,046                            | 358132,007                       | 275797,926             | 268592,43             | 7192,10833        |

### Validation of assay linearity

Assay linearity was measured in initial experiments. Cell seeding, transfection and assay implementation were performed identically as described for the final viability measurements. Assay linearity was ensured for up to 30 h but not up to 50 h (see Supplementary Figure 32).

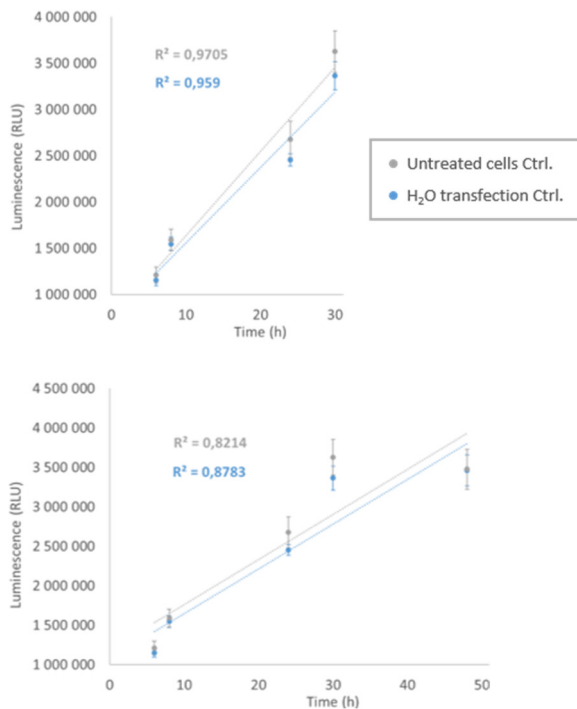

Supplementary Figure 32. Measurements for assay linearity of cell viability assay.

## Preparation of DNA primers, oligonucleotides and hydrolysis probes

DNA primer oligonucleotides, splint and adapter oligonucleotides as well as qPCR primer oligonucleotides and hydrolysis probes were synthesized by *Biomers.net*, Germany.

## Preparation of dNaM-modified DNA primers and DNA oligonucleotides

dNaM cyanoethyl phosphoramidite (Supplementary Figure 30) was purchased from *Berry & Associates Inc.*, USA. dNaM-modified primer oligonucleotides were prepared by solid phase synthesis in 200 nmol scale by *Ella Biotech*, Germany. dNaM triphosphate (TP) was purchased from *MyChem LLC*, USA. dTPT3 TP was synthesized according to literature.<sup>1</sup>

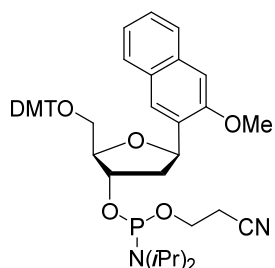

Supplementary Figure 33. dNaM cyanoethyl phosphoramidite.

## Preparation of variant mCh\_DNA and mCh\_RNA sequences

Two different 3'-UTR sequences of **mCh\_mRNAs** were used for experiments. For **mCh\_DNA** and **mCh\_RNA** the 3'-UTR sequence was adopted as it stands from the *pmCherry-N1* plasmid 3'-UTR following the mCherry protein coding region. To investigate possible effects of the UB modifications placed at different positions within the 3'-UTR sequence, we also prepared **mCh\_DNA<sub>UTR2</sub>** and **mCh\_RNA<sub>UTR2</sub>**. Therefore, a reverse primer was designed that hybridizes to an earlier section (G1393 to A1412) of the *pmCherry-N1* plasmid 3'-UTR during PCR amplification of the **mCh\_DNA<sub>UTR2</sub>** template. To obtain sequences of equal length for both **mCh\_DNA** and **mCh\_DNA<sub>UTR2</sub>**, a compensatory overhang sequence was adapted from the *pmCherry-C1* plasmid (G1501 to T1520) and added to the 5' end of reverse primer **mCh\_RV<sub>UTR2</sub>**.

In order to generate all dsDNA templates for subsequent mCh\_mRNA IVT, two different PCR amplification techniques were performed. On the one hand, canonical 4-letter PCRs applying unmodified reverse primer were carried out to yield unmodified **mCh\_DNA**. On the other hand, site-specific UB modified **mCh\_DNA<sup>UBP</sup>** was yielded using expanded 6-letter PCRs applying dNaM-modified reverse primers and the unnatural desoxynucleoside triphosphates dTPT3 TP and dNaM TP. Samples of UB modified PCR products as well as canonical PCR products were sent to Sanger sequencing to approve the desired sequence identities (for sequencing results see below).

Subsequently, mCh\_mRNA was obtained by either standard T7 IVT for **mCh\_mRNA<sup>WT</sup>**, **mCh\_mRNA<sup>1PM</sup>** and **mCh\_mRNA<sup>2PM</sup>**, or GENAEXT for **mCh\_mRNA<sup>1CP</sup>** and **mCh\_mRNA<sup>2CP</sup>**, using **rTPT3<sup>CP</sup>** TP as additional ribonucleoside triphosphate (Figure 2e and Supplementary Figures 8, 9). Furthermore, to check compatibility of the UB modification with additional chemical RNA alterations 1.25 mM  $\Psi$  TP and 1.25 mM 5mC TP were added to the

transcription mix. By this, RNA variants of either wild type and UB modified mCh\_mRNA bearing multiple  $\Psi$  and 5mC modifications were synthesized (Figure 2f and Supplementary Figure 7). A complete replacement of  $\Psi$  for U or 5mC for C was not aimed. Instead, a random exchange of approx. 50% of canonical U and C was reached.

## List of DNA and RNA sequences

Plasmid sequence:

***pmCherry-N1*** (4724 bp), insertion of two nucleotides **AA** at position 1388 (bold and underlined), silent mutation of stop codon, no influence on mCherry protein coding sequence (underlined with dotted line)

5'-TAGTTATTAATAGTAATCAATTACGGGGTCATTAGTTCATAGCCCATATATGGAGTTCGCGTTACATAACTT  
ACGGTAAATGGCCCGCCTGGCTGACCGCCCAACGACCCCGCCATTGACGTCAATAATGACGTATGTTCC  
CATAGTAACGCCAATAGGGACTTTCCATTGACGTCAATGGGTGGAGTATTTACGGTAAACTGCCCACTTGGC  
AGTACATCAAGTGTATCATATGCCAAGTACGCCCCCTATTGACGTCAATGACGGTAAATGGCCCGCCTGGCA  
TTATGCCCAGTACATGACCTTATGGGACTTTTCTACTTGGCAGTACATCTACGTATTAGTCATCGCTATTACCA  
TGGTGATGCGTTTTTGGCAGTACATCAATGGGCGTGGATAGCGGTTTGACTCACGGGGATTTCCAAGTCTCC  
ACCCATTGACGTCAATGGGAGTTTGTGTTTGGCACCAAATCAACGGGACTTTCCAAAATGTCGTAACAACTC  
CGCCCCATTGACGCAAATGGGCGGTAGGCGTGTACGGTGGGAGGTCTATATAAGCAGAGCTGGTTTAGTGA  
ACCGTCAGATCCGCTAGCGCTACCGGACTCAGATCTCGAGCTCAAGCTTCTGAATTCTGCAGTCGACGGTACC  
GCGGGCCCGGATCCACCGGTCGCCACCATGGTGAGCAAGGGCGAGGAGGATAACATGGCCATCATCAAG  
GAGTTCATGCGCTTCAAGGTGCACATGGAGGGCTCCGTGAACGGCCACGAGTTCGAGATCGAGGGCGAGG  
GCGAGGGCCGCCCTACGAGGGCACCCAGACCGCCAAGCTGAAGGTGACCAAGGGTGGCCCCCTGCCCTT  
CGCCTGGGACATCCTGTCCCTCAGTTCATGTACGGCTCCAAGGCCTACGTGAAGCACCCGCGGACATCC  
CCGACTACTTGAAGCTGTCCTTCCCCGAGGGCTTCAAGTGGGAGCGCGTGATGAACTTCGAGGACGGCGGC  
GTGGTGACCGTGACCCAGGACTCCTCCCTGCAGGACGGCGAGTTCATCTACAAGGTGAAGCTGCGCGGCAC  
CAACTTCCCCTCCGACGGCCCCGTAATGCAGAAGAAGACCATGGGCTGGGAGGCCTCCTCCGAGCGGATGT  
ACCCCGAGGACGGCGCCCTGAAGGGCGAGATCAAGCAGAGGCTGAAGCTGAAGGACGGCGGCCACTACGA  
CGCTGAGGTCAAGACCACCTACAAGGCCAAGAAGCCCGTGCAGCTGCCCGGCGCCTACAACGTCAACATCA  
AGTTGGACATCACCTCCCACAACGAGGACTACCCATCGTGGAACAGTACGAACGCGCCGAGGGCCGCCAC  
TCCACC GGCGGCATGGACGAGCTGTACAAGT**AA**AGCGGCCGCGACTCTAGATCATAATCAGCCATACCACA  
TTTGTAGAGGTTTTACTTGCTTTAAAAAACCTCCCACACCTCCCCCTGAACCTGAAACATAAAATGAATGCAAT  
TGTTGTTGTTAACTTGTTTATTGCAGCTTATAATGGTTACAAATAAAGCAATAGCATCACAATTTTCAAAATAA  
AGCATTTTTTTCACTGCATTCTAGTTGTGGTTTGTCCAAACTCATCAATGTATCTTAAGGCGTAAATTGTAAGC  
GTTAATATTTTGTAAATTCGCGTTAAATTTTTGTTAAATCAGCTCATTTTTTAAACCAATAGGCCGAAATCGGC  
AAAATCCCTTATAAATCAAAGAATAGACCGAGATAGGGTTGAGTGTTGTTCCAGTTTGAACAAGAGTCCAC  
TATTAAGAACGTGGACTCCAACGTCAAAGGGCGAAAAACCGTCTATCAGGGCGATGGCCCACTACGTGAAC  
CATCACCTAATCAAGTTTTTTGGGGTTCGAGGTGCCGTAAGCACTAAATCGGAACCCTAAAGGGAGCCCC  
GATTTAGAGCTTGACGGGGAAAGCCGGCGAACGTGGCGAGAAAGGAAGGGAAGAAAGCGAAAGGAGCGGG  
CGCTAGGGCGCTGGCAAGTGTAGCGGTACGCTGCGCGTAACCACCACACCCGCGCGCTTAATGCGCCG  
CTACAGGGCGCGTCAGGTGGCACTTTTCGGGGAAATGTGCGCGGAACCCCTATTTGTTATTTTTCTAAATAC  
ATTCAAATATGTATCCGCTCATGAGACAATAACCCTGATAAATGCTTCAATAATATTGAAAAAGGAAGAGTCCT  
GAGGCGGAAAGAACCAGCTGTGGAATGTGTGTGTCAGTTAGGGTGTGGAAAGTCCCCAGGCTCCCCAGCAGGC  
AGAAGTATGCAAAGCATGCATCTCAATTAGTCAGCAACCAGGTGTGGAAAGTCCCCAGGCTCCCCAGCAGGC  
AGAAGTATGCAAAGCATGCATCTCAATTAGTCAGCAACCATAGTCCCGCCCCTAACTCCGCCCATCCCGCCC  
CTAACTCCGCCAGTTCGCCCCATTCTCCGCCCATGGCTGACTAATTTTTTTTTATTTATGCAGAGGCCGAGG  
CCGCCTCGGCCTCTGAGCTATTCCAGAAGTAGTGAGGAGGCTTTTTTGGAGGCCTAGGCTTTTGCAAAGATC  
GATCAAGAGACAGGATGAGGATCGTTTCGCATGATTGAACAAGATGGATTGCACGCAGGTTCTCCGGCCGCT  
TGGGTGGAGAGGCTATTCGGCTATGACTGGGCACAACAGACAATCGGCTGCTCTGATGCCGCCGTGTTCCG  
GCTGTCAGCGCAGGGGCGCCGGTCTTTTTGTCAAGACCGACCTGTCCGGTGCCCTGAATGAACTGCAAG  
ACGAGGCAGCGCGGCTATCGTGGCTGGCCACGACGGGCGTTCCTTGCGCAGCTGTGCTCGACGTTGTAC  
TGAAGCGGGAAGGACTGGCTGCTATTGGGCGAAGTGCCGGGGCAGGATCTCCTGTCATCTCACCTTGCTC  
CTGCCGAGAAAGTATCCATCATGGCTGATGCAATGCGGCGGCTGCATACGCTTGATCCGGCTACCTGCCCAT  
TCGACCACCAAGCGAAACATCGCATCGAGCGAGCACGTA CTGGATGGAAGCCGGTCTTGTGATCAGGAT  
GATCTGGACGAAGAGCATCAGGGGCTCGCGCCAGCCGAACTGTTCCGCCAGGCTCAAGGCGAGCATGCCCG  
ACGGCGAGGATCTCGTCTGACCCATGGCGATGCCTGCTTGCCGAATATCATGGTGGAAAATGGCCGCTTTT



CTGGATTCATCGACTGTGGCCGGCTGGGTGTGGCGGACCGCTATCAGGACATAGCGTTGGCTACCCGTGAT  
ATTGCTGAAGAGCTTGGCGGCGAATGGGCTGACCGCTTCTCTCGTGCTTTACGGTATCGCCGCTCCCGATT  
GCAGCGCATCGCCTTCTATCGCCTTCTTGACGAGTTCTTCTGAGCGGGACTCTGGGGTTCGAAATGACCGAC  
CAAGCGACGCCAACCTGCCATCACGAGATTTGATTCCACCGCCGCTTCTATGAAAGGTTGGGCTTCGGA  
ATCGTTTTCCGGGACGCCGGCTGGATGATCCTCCAGCGCGGGGATCTCATGCTGGAGTTCTTCGCCACCC  
TAGGGGGAGGCTAACTGAAACACGGAAGGAGACAATACCGGAAGGAACCCGCGCTATGACGGCAATAAAAA  
GACAGAATAAAACGCACGGTGTGGGTCGTTTGTTCATAAACGCGGGGTTCCGGTCCCAGGGCTGGCACTCT  
GTCGATACCCACCGAGACCCATTGGGGCCAATACGCCCGCGTTTCTTCTTTTTCCACCCACCCACCCCA  
AGTTCGGGTGAAGGCCAGGGCTCGCAGCCAACGTCGGGGCGGCAGGCCCTGCCATAGCCTCAGGTTACT  
CATATATACTTTAGATTGATTTAAACTTCATTTTTAATTTAAAGGATCTAGGTGAAGATCCTTTTTGATAATCT  
CATGACCAAATCCCTTAACGTGAGTTTTCGTTCCACTGAGCGTCAGACCCCGTAGAAAAGATCAAAGGATCT  
TCTTGAGATCCTTTTTTTCTGCGCGTAATCTGCTGCTTGCAAACAAAAAACCCACCGCTACCAGCGGTGGTTT  
GTTTGCCGGATCAAGAGCTACCAACTCTTTTTCCGAAGGTAAGTGGCTTCAGCAGAGCGCAGATACCAAATA  
CTGTCCTTCTAGTGTAGCCGTAGTTAGGCCACCACTTCAAGAACTCTGTAGCACCGCCTACATACCTCGCTCT  
GCTAATCCTGTTACCAGTGGCTGCTGCCAGTGGCGATAAGTCGTGTCTTACCGGGTTGACTCAAGACGATA  
GTTACCGGATAAGGCGCAGCGGTTCGGGCTGAACGGGGGGTTCGTGCACACAGCCCAGCTTGGAGCGAACG  
ACCTACACCGAACTGAGATACCTACAGCGTGAGCTATGAGAAAGCGCCACGCTTCCCGAAGGGAGAAAGC  
GGACAGGTATCCGGTAAGCGGCAGGGTCGGAACAGGAGAGCGCACGAGGGAGCTTCCAGGGGGAAACGC  
CTGGTATCTTTATAGTCTGTCGGGTTTCGCCACCTCTGACTTGAGCGTCGATTTTTGTGATGCTCGTCAGGG  
GGGCGGAGCCTATGAAAAACGCCAGCAACGCGGCCTTTTTACGGTTCCTGGCCTTTTGTGGCCTTTTGT  
CACATGTTCTTCTGCGTTATCCCCTGATTCTGTGGATAACCGTATTACCGCCATGCAT-3'

#### Primer sequences:

**mCh\_FW** (39 nt, T7 promotor sequence underlined, after promotor sequence two additional nucleotides GG (dotted line) were added for enhanced T7 RNA polymerase transcription start)

5'-TAATACGACTCACTATAGGGCTCAAGCTTCGAATTCTGC-3'

**mCh\_RV** (24 nt)

5'-ACAAATGTGGTATGGCTGATTATG-3'

**mCh\_RV<sup>1</sup> dNaM** (N=dNaM) or **mCh\_RV<sup>1</sup> PM** (N=C) (24 nt)

5'-ACAAATGTGGTANGGCTGATTATG-3'

**mCh\_RV<sup>2</sup> dNaM** (N=dNaM) or **mCh\_RV<sup>2</sup> PM** (N=C) (24 nt)

5'-ACAAANGTGGTATGGCTGANATG-3'

**mCh\_RV<sub>UTR 2</sub>**

(alternative 5' end overhang sequence marked with dashed line, 40 nt)

5'-ATAAACAAAGTTAAACAACAACTATGATCTAGAGTCGCGGCC-3'

**mCh\_RV<sup>1 dNaM</sup><sub>UTR 2</sub> (N=dNaM) or mCh\_RV<sup>1 PM</sup><sub>UTR 2</sub> (N=C)**  
(alternative 5' end overhang sequence marked with dashed line, 40 nt)  
5'-ATAAACAAGTTAACAACAACTATGATC**N**AGAGTCGCGGCC-3'

**mCh\_RV<sup>2 dNaM</sup><sub>UTR 2</sub> (N=dNaM) or mCh\_RV<sup>2 PM</sup><sub>UTR 2</sub> (N=C)**  
(alternative 5' end overhang sequence marked with dashed line, 40 nt)  
5'- ATAAACAAGTTAACAACAACT**N**GATCTAGAG**N**CGCGGCC -3'

**mCh\_qPCR<sup>internal</sup>\_FW (21 nt)**  
5'-CCCGACTACTTGAAGCTGTCC-3'

**mCh\_qPCR<sup>internal</sup>\_RV (22 nt)**  
5'-TCACCTTGTAGATGAACTCGCC-3'

**mCh\_qPCR<sup>3'-end</sup>\_FW (22 nt)**  
5'-ATCAAGTTGGACATCACCTCCC-3'

**mCh\_qPCR<sup>3'-end</sup>\_RV (22 nt)**  
5'-CGCTTTACTTGTACAGCTCGTC-3'

**GAPDH\_qPCR\_FW (22 nt)**  
5'-AGCCTCAAGATCATCAGCAATG-3'

**GAPDH\_qPCR\_RV (23 nt)**  
5'-ATGGACTGTGGTCATGAGTCCTT-3'

**$\beta$ -Actin\_qPCR\_FW (20 nt)**  
5'-GGTCATCACCATTGGCAATG-3'

**$\beta$ -Actin\_qPCR\_RV (23 nt)**  
5'-CGTCACACTTCATGATGGAGTTG-3'

**ext-qPCR\_FW** (17 nt)

5'-GCGTTTACCCGCCATCC-3'

**mCh\_ext-qPCR<sup>internal</sup>\_RV** (21 nt)

5'-TCACCTTG TAGATGAACTCGC-3'

**mCh\_ext-qPCR<sup>3'-end</sup>\_RV** (22 nt)

5'-CGCTTTACTTGTACAGCTCGTC-3'

**GAPDH\_ext-qPCR\_RV** (21 nt)

5'-ATGGACTGTGGTCATGAGTCC-3'

**$\beta$ -Actin\_ext-qPCR\_RV** (23 nt)

5'-CGTCACACTTCATGATGGAGTTG-3'

**Hydrolysis probe sequences for qPCR:**

**mCh\_qPCR<sup>internal</sup>\_probe** (23 nt)

5'-HEX-TGACCGTGACCCAGGACTCCTCC-BMN-Q535-3'

**mCh\_qPCR<sup>3'-end</sup>\_probe** (26 nt)

5'-FAM-ACACCATCGTGGAACAGTACGAACGC-BMN-Q535-3'

**GAPDH\_qPCR\_probe** (23 nt)

5'-Cyanine 5-CCAACTGCTTAGCACCCCTGGCC-BMN-Q620-3'

**$\beta$ -Actin\_qPCR\_probe** (29 nt)

5'-Cyanine 3.5-ATGGAGTCCTGTGGCATCCACGAACTAC-BMN-Q590-3'

**Adapter and splint sequences for qPCR extension:**

**qPCR\_adapter** (130 nt)

5'-GCGTTTACCCGCCATCCGCACATGCCACCCTCCAGATATATTCGTCTCGACCAAATCACTTGGCAGTCTAG  
GCGATCGCGATGGCCTGAGTCTAGAGCTCGAGTTCGAAGCTTAAGACGTCAGCTGCCAT-3'

**mCh\_qPCR<sup>internal</sup>\_splint** (30 nt)

5'-GCTTCAAGTAGTCGGGATGGCAGCTGACGT-3'

**mCh\_qPCR<sup>3'-end</sup>\_splint** (32 nt)

5'-GGTGATGTCCAACCTTGATATGGCAGCTGACGT-3'

**GAPDH\_qPCR\_splint** (31 nt)

5'-CTGATGATCTTGAGGCTATGGCAGCTGACGT-3'

**$\beta$ -Actin\_qPCR\_splint** (30 nt)

5'-GCCAATGGTGATGACCATGGCAGCTGACGT-3'

**Primer sequences for Sanger sequencing:**

**mCh\_Seq** (17 nt)

5'-GTGGAACAGTACGAACG-3'

**T7\_Seq** (20 nt)

5'-TAATACGACTCACTATAGGG-3'

**DNA sequences:**

**mCh\_DNA<sup>WT</sup>** (834 bp, mCherry protein coding region underlined)

5'-TAATACGACTCACTATAGGGCTCAAGCTTCTGAATTCTGCAGTCGACGGTACCGCGGGCCCGGGATCCACC  
GGTCGCCACCATGGTGAGCAAGGGCGAGGAGGATAACATGGCCATCATCAAGGAGTTCATGCGCTTCAAGG  
TGACATGGAGGGCTCCGTGAACGGCCACGAGTTCGAGATCGAGGGCGAGGGCGAGGGCCGCCCTACGA  
GGGCACCCAGACCGCCAAGCTGAAGGTGACCAAGGGTGGCCCCCTGCCCTTCGCCTGGGACATCCTGTCC  
CCTCAGTTCATGTACGGCTCCAAGGCCTACGTGAAGCACCCCGCCGACATCCCGACTACTTGAAGCTGTCC  
TTCCCCGAGGGCTTCAAGTGGGAGCGCGTGATGAACTTCGAGGACGGCGGCGTGTTGACCGTGACCCAGG  
ACTCCTCCCTGCAGGACGGCGAGTTCATCTACAAGGTGAAGCTGCGCGGCACCAACTTCCCCTCCGACGGC  
CCCGTAATGCAGAAGAAGACCATGGGCTGGGAGGCCTCCTCCGAGCGGATGTACCCCGAGGACGGCGCCC  
TGAAGGGCGAGATCAAGCAGAGGCTGAAGCTGAAGGACGGCGGCCACTACGACGCTGAGGTCAAGACCAC  
CTACAAGGCCAAGAAGCCCCTGCAGCTGCCCGGCGCCTACAACGTCAACATCAAGTTGGACATCACCTCCC  
ACAACGAGGACTACACCATCGTGGAACAGTACGAACGCGCCGAGGGCCGCCACTCCACCGGCGGCATGGA  
CGAGCTGTACAAGTAAAGCGGCCGCGACTCTAGATCATAATCAGCCATACCACATTTGT-3'

**mCh\_DNA<sup>1UBP</sup> (N=dTPT3)** or **mCh\_DNA<sup>1PM</sup> (N=G)**  
(834 bp, mCherry protein coding region underlined)

5'-TAATACGACTCACTATAGGGCTCAAGCTTCTGAATTCTGCAGTCGACGGTACCGCGGGCCCGGGATCCACC  
GGTCGCCACCATGGTGAGCAAGGGCGAGGAGGATAACATGGCCATCATCAAGGAGTTCATGCGCTTCAAGG  
TGACATGGAGGGCTCCGTGAACGGCCACGAGTTCGAGATCGAGGGCGAGGGCGAGGGCCGCCCTACGA  
GGGCACCCAGACCGCCAAGCTGAAGGTGACCAAGGGTGGCCCCCTGCCCTTCGCCTGGGACATCCTGTCC  
CCTCAGTTCATGTACGGCTCCAAGGCCTACGTGAAGCACCCCGCCGACATCCCGACTACTTGAAGCTGTCC  
TTCCCCGAGGGCTTCAAGTGGGAGCGCGTGATGAACTTCGAGGACGGCGGCGTGTTGACCGTGACCCAGG  
ACTCCTCCCTGCAGGACGGCGAGTTCATCTACAAGGTGAAGCTGCGCGGCACCAACTTCCCCTCCGACGGC  
CCCGTAATGCAGAAGAAGACCATGGGCTGGGAGGCCTCCTCCGAGCGGATGTACCCCGAGGACGGCGCCC  
TGAAGGGCGAGATCAAGCAGAGGCTGAAGCTGAAGGACGGCGGCCACTACGACGCTGAGGTCAAGACCAC  
CTACAAGGCCAAGAAGCCCCTGCAGCTGCCCGGCGCCTACAACGTCAACATCAAGTTGGACATCACCTCCC  
ACAACGAGGACTACACCATCGTGGAACAGTACGAACGCGCCGAGGGCCGCCACTCCACCGGCGGCATGGA  
CGAGCTGTACAAGTAAAGCGGCCGCGACTCTAGATCATAATCAGCCNTACCACATTTGT-3'

**mCh\_DNA<sup>2UBP</sup> (834 bp, N=dTPT3)** or **mCh\_DNA<sup>2PM</sup> (N=G)**  
(834 bp, mCherry protein coding region underlined)

5'-TAATACGACTCACTATAGGGCTCAAGCTTCTGAATTCTGCAGTCGACGGTACCGCGGGCCCGGGATCCACC  
GGTCGCCACCATGGTGAGCAAGGGCGAGGAGGATAACATGGCCATCATCAAGGAGTTCATGCGCTTCAAGG  
TGACATGGAGGGCTCCGTGAACGGCCACGAGTTCGAGATCGAGGGCGAGGGCGAGGGCCGCCCTACGA  
GGGCACCCAGACCGCCAAGCTGAAGGTGACCAAGGGTGGCCCCCTGCCCTTCGCCTGGGACATCCTGTCC  
CCTCAGTTCATGTACGGCTCCAAGGCCTACGTGAAGCACCCCGCCGACATCCCGACTACTTGAAGCTGTCC  
TTCCCCGAGGGCTTCAAGTGGGAGCGCGTGATGAACTTCGAGGACGGCGGCGTGTTGACCGTGACCCAGG  
ACTCCTCCCTGCAGGACGGCGAGTTCATCTACAAGGTGAAGCTGCGCGGCACCAACTTCCCCTCCGACGGC  
CCCGTAATGCAGAAGAAGACCATGGGCTGGGAGGCCTCCTCCGAGCGGATGTACCCCGAGGACGGCGCCC  
TGAAGGGCGAGATCAAGCAGAGGCTGAAGCTGAAGGACGGCGGCCACTACGACGCTGAGGTCAAGACCAC  
CTACAAGGCCAAGAAGCCCCTGCAGCTGCCCGGCGCCTACAACGTCAACATCAAGTTGGACATCACCTCCC  
ACAACGAGGACTACACCATCGTGGAACAGTACGAACGCGCCGAGGGCCGCCACTCCACCGGCGGCATGGA  
CGAGCTGTACAAGTAAAGCGGCCGCGACTCTAGATCATANTCAGCCTTACCACNTTTGT-3'

**mCh\_DNA<sup>WT</sup><sub>UTR 2</sub>**

(834 bp, mCherry protein coding region underlined)

5'-TAATACGACTCACTATAGGGCTCAAGCTTCTGAATTCTGCAGTCGACGGTACCGCGGGCCCGGGATCCACC  
GGTCGCCACCATGGTGAGCAAGGGCGAGGAGGATAACATGGCCATCATCAAGGAGTTCATGCGCTTCAAGG  
TGCACATGGAGGGCTCCGTGAACGGCCACGAGTTCGAGATCGAGGGCGAGGGCGAGGGCCGCCCTACGA  
GGGCACCCAGACCGCCAAGCTGAAGGTGACCAAGGGTGGCCCCCTGCCCTTCGCCTGGGACATCCTGTCC  
CCTCAGTTCATGTACGGCTCCAAGGCCTACGTGAAGCACCCCGCCGACATCCCCGACTACTTGAAGCTGTCC  
TTCCCCGAGGGCTTCAAGTGGGAGCGCGTGATGAACTTCGAGGACGGCGGCGTGGTGACCGTGACCCAGG  
ACTCCTCCCTGCAGGACGGCGAGTTCATCTACAAGGTGAAGCTGCGCGGCACCAACTTCCCCTCCGACGGC  
CCCGTAATGCAGAAGAAGACCATGGGCTGGGAGGCCTCCTCCGAGCGGATGTACCCCGAGGACGGCGGCC  
TGAAGGGCGAGATCAAGCAGAGGCTGAAGCTGAAGGACGGCGGCCACTACGACGCTGAGGTCAAGACCAC  
CTACAAGGCCAAGAAGCCCGTGCAGCTGCCCGGCGCCTACAACGTCAACATCAAGTTGGACATCACCTCCC  
ACAACGAGGACTACACCATCGTGGAACAGTACGAACGCGCCGAGGGCCGCCACTCCACCGGCGGCATGGA  
CGAGCTGTACAAGTAAAGCGGCCGCGACTCTAGATCATAGTTGTTGTTAACTTGTTTAT-3'

**mCh\_DNA<sup>1UBP</sup><sub>UTR 2</sub> (N=dTPT3) or mCh\_DNA<sup>1PM</sup><sub>UTR 2</sub> (N=G)**

(834 bp, mCherry protein coding region underlined)

5'-TAATACGACTCACTATAGGGCTCAAGCTTCTGAATTCTGCAGTCGACGGTACCGCGGGCCCGGGATCCACC  
GGTCGCCACCATGGTGAGCAAGGGCGAGGAGGATAACATGGCCATCATCAAGGAGTTCATGCGCTTCAAGG  
TGCACATGGAGGGCTCCGTGAACGGCCACGAGTTCGAGATCGAGGGCGAGGGCGAGGGCCGCCCTACGA  
GGGCACCCAGACCGCCAAGCTGAAGGTGACCAAGGGTGGCCCCCTGCCCTTCGCCTGGGACATCCTGTCC  
CCTCAGTTCATGTACGGCTCCAAGGCCTACGTGAAGCACCCCGCCGACATCCCCGACTACTTGAAGCTGTCC  
TTCCCCGAGGGCTTCAAGTGGGAGCGCGTGATGAACTTCGAGGACGGCGGCGTGGTGACCGTGACCCAGG  
ACTCCTCCCTGCAGGACGGCGAGTTCATCTACAAGGTGAAGCTGCGCGGCACCAACTTCCCCTCCGACGGC  
CCCGTAATGCAGAAGAAGACCATGGGCTGGGAGGCCTCCTCCGAGCGGATGTACCCCGAGGACGGCGGCC  
TGAAGGGCGAGATCAAGCAGAGGCTGAAGCTGAAGGACGGCGGCCACTACGACGCTGAGGTCAAGACCAC  
CTACAAGGCCAAGAAGCCCGTGCAGCTGCCCGGCGCCTACAACGTCAACATCAAGTTGGACATCACCTCCC  
ACAACGAGGACTACACCATCGTGGAACAGTACGAACGCGCCGAGGGCCGCCACTCCACCGGCGGCATGGA  
CGAGCTGTACAAGTAAAGCGGCCGCGACTCTNGATCATAGTTGTTGTTAACTTGTTTAT-3'

**mCh\_DNA<sup>2UBP</sup><sub>UTR 2</sub> (N=dTPT3) or mCh\_DNA<sup>2PM</sup><sub>UTR 2</sub> (N=G)**

(834 bp, mCherry protein coding region underlined)

5'-TAATACGACTCACTATAGGGCTCAAGCTTCTGAATTCTGCAGTCGACGGTACCGCGGGCCCGGGATCCACC  
GGTCGCCACCATGGTGAGCAAGGGCGAGGAGGATAACATGGCCATCATCAAGGAGTTCATGCGCTTCAAGG  
TGCACATGGAGGGCTCCGTGAACGGCCACGAGTTCGAGATCGAGGGCGAGGGCGAGGGCCGCCCTACGA  
GGGCACCCAGACCGCCAAGCTGAAGGTGACCAAGGGTGGCCCCCTGCCCTTCGCCTGGGACATCCTGTCC  
CCTCAGTTCATGTACGGCTCCAAGGCCTACGTGAAGCACCCCGCCGACATCCCCGACTACTTGAAGCTGTCC  
TTCCCCGAGGGCTTCAAGTGGGAGCGCGTGATGAACTTCGAGGACGGCGGCGTGGTGACCGTGACCCAGG  
ACTCCTCCCTGCAGGACGGCGAGTTCATCTACAAGGTGAAGCTGCGCGGCACCAACTTCCCCTCCGACGGC  
CCCGTAATGCAGAAGAAGACCATGGGCTGGGAGGCCTCCTCCGAGCGGATGTACCCCGAGGACGGCGGCC  
TGAAGGGCGAGATCAAGCAGAGGCTGAAGCTGAAGGACGGCGGCCACTACGACGCTGAGGTCAAGACCAC  
CTACAAGGCCAAGAAGCCCGTGCAGCTGCCCGGCGCCTACAACGTCAACATCAAGTTGGACATCACCTCCC  
ACAACGAGGACTACACCATCGTGGAACAGTACGAACGCGCCGAGGGCCGCCACTCCACCGGCGGCATGGA  
CGAGCTGTACAAGTAAAGCGGCCGCGNCTCTAGATCN TAGTTGTTGTTAACTTGTTTAT-3'

**mCh\_qPCR<sup>internal</sup>** (130 bp)

5'-CCCGACTACTTGAAGCTGTCCTTCCCCGAGGGCTTCAAGTGGGAGCGCGTGATGAACTTCGAGGACGGC  
GGCGTGGTGACCGTGACCCAGGACTCCTCCCTGCAGGACGGCGAGTTCATCTACAAGGTGA-3'

**mCh\_qPCR<sup>3'-end</sup>** (112 bp)

5'-ATCAAGTTGGACATCACCTCCCACAACGAGGACTACACCATCGTGGAACAGTACGAACGCGCCGAGGGCC  
GCCACTCCACCGGCGGCATGGACGAGCTGTACAAGTAAAGCG-3'

**GAPDH\_qPCR** (111 bp)

5'-AGCCTCAAGATCATCAGCAATGCCTCCTGCACCACCAACTGCTTAGCACCCCTGGCCAAGGTCATCCATG  
ACAACCTTGGTATCGTGGAAGGACTCATGACCACAGTCCAT-3'

**$\beta$ -Actin\_qPCR** (122 bp)

5'-GGTCATCACCATTGGCAATGAGCGGTTCCGCTGCCCTGAGGCACTCTTCCAGCCTTCTTCCCTGGGCATG  
GAGTCCTGTGGCATCCACGAACTACCTTCAACTCCATCATGAAGTGTGACG-3'

**mCh\_ext-qPCR<sup>internal</sup>** (260 bp)

5'-GCGTTTACCCGCCATCCGCACATGCCACCCTCCAGATATATTCGTCTCGACCAAATCACTTGGCAGTCTAG  
GCGATCGCGATGGCCTGAGTCTAGAGCTCGAGTTCGAAGCTTAAGACGTCAGCTGCCATCCCGACTACTTGA  
AGCTGTCCTTCCCCGAGGGCTTCAAGTGGGAGCGCGTGATGAACTTCGAGGACGGCGGCGTGGTGACCGT  
GACCCAGGACTCCTCCCTGCAGGACGGCGAGTTCATCTACAAGGTGA-3'

**mCh\_ext-qPCR<sup>3'-end</sup>** (242 bp)

5'-GCGTTTACCCGCCATCCGCACATGCCACCCTCCAGATATATTCGTCTCGACCAAATCACTTGGCAGTCTAG  
GCGATCGCGATGGCCTGAGTCTAGAGCTCGAGTTCGAAGCTTAAGACGTCAGCTGCCATATCAAGTTGGACA  
TCACCTCCCACAACGAGGACTACACCATCGTGGAACAGTACGAACGCGCCGAGGGCCGCCACTCCACCGGC  
GGCATGGACGAGCTGTACAAGTAAAGCG-3'

**GAPDH\_ext-qPCR** (241 bp)

5'-GCGTTTACCCGCCATCCGCACATGCCACCCTCCAGATATATTCGTCTCGACCAAATCACTTGGCAGTCTAG  
GCGATCGCGATGGCCTGAGTCTAGAGCTCGAGTTCGAAGCTTAAGACGTCAGCTGCCATAGCCTCAAGATCA  
TCAGCAATGCCTCCTGCACCACCAACTGCTTAGCACCCCTGGCCAAGGTCATCCATGACAACCTTGGTATCG  
TGAAGGACTCATGACCACAGTCCAT-3'

**$\beta$ -Actin\_ext-qPCR** (252 bp)

5'-GCGTTTACCCGCCATCCGCACATGCCACCCTCCAGATATATTCGTCTCGACCAAATCACTTGGCAGTCTAG  
GCGATCGCGATGGCCTGAGTCTAGAGCTCGAGTTCGAAGCTTAAGACGTCAGCTGCCATGGTCATCACCATT

GGCAATGAGCGGTTCCGCTGCCCTGAGGCACTCTTCCAGCCTTCCTTCTGGGCATGGAGTCCTGTGGCAT  
 CCACGAAACTACCTTCAACTCCATCATGAAGTGTGACG-3'

**RNA sequences:**

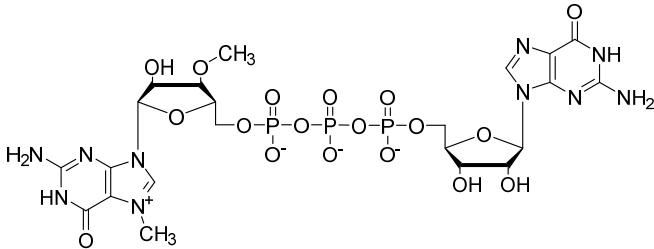

**Supplementary Figure 34. Structure of anti-reverse cap analog (ARCA).**

**mCh\_mRNA<sup>WT</sup>** (817 nt, mCherry protein coding region underlined)

5'-ARCA-GGGCUCAAGCUUCGAAUUCUGCAGUCGACGGUACCGCGGGGCCGGGAUCCACCGGUCGCCACC  
 AUGGUGAGCAAGGGCGAGGAGGAUAACAUGGCCAUCAUCAAGGAGUJCAUGCGCUJCAAGGUGCACAUG  
 GAGGGCUCGUGAACGGCCACGAGUUCGAGAUUCGAGGGCGAGGGCGAGGGCCGCCCUACGAGGGCAC  
 CCAGACCGCCAAGCUGAAGGUGACCAAGGGUGGCCCCUGCCCUUCGCCUJGGGACAUCUGUCCCUCA  
 GUUCAUGUACGGCUCCAAGGCCUACGUGAAGCACCCCGCCGACAUCGCCGACUACUJGAAGCUGUCCUU  
 CCCCAGGGGUUCAAGUGGGAGCGCGUGAUGAACUUCGAGGACGGCGGGCGUGGGUACCGUGACCCAGG  
 ACUCCUCCUGCAGGACGGCGAGUUAUCUACAAGGUGAAGCUGCGCGGCACCAACUJCCCUCCGACG  
 GCCCCGUAAUJGAGAAGAAGACCAUGGGCUGGGAGGCCUCCUCCGAGCGGAUGUACCCCGAGGACGGCG  
 CCCUGAAGGGCGAGAUCAAGCAGAGGCUGAAGCUGAAGGACGGCGGCCACUACGACGCUGAGGUCAAGA  
 CCACCUACAAGGCCAAGAAGCCCGUGCAGCUGCCCGGCCUACAACGUAACAUAAGUJGGACAUCAC  
 CUCCACAACGAGGACUACACCAUCGUGGAACAGUACGAACGCGCCGAGGGCCGCCACUCCACCGGCGG  
 CAUGGACGAGCUGUACAAGUAAAGCGGCCGCGACUCUAGAUAUAUAUCAGCCAUACCACAUUUGU-poly(A)-  
 3'

**mCh\_mRNA<sup>1CP</sup>** (N=rTPT3<sup>CP</sup>) or **mCh\_mRNA<sup>1PM</sup>** (N=G)  
 (817 nt, mCherry protein coding region underlined)

5'-ARCA-GGGCUCAAGCUUCGAAUUCUGCAGUCGACGGUACCGCGGGGCCGGGAUCCACCGGUCGCCACC  
 AUGGUGAGCAAGGGCGAGGAGGAUAACAUGGCCAUCAUCAAGGAGUJCAUGCGCUJCAAGGUGCACAUG  
 GAGGGCUCGUGAACGGCCACGAGUUCGAGAUUCGAGGGCGAGGGCGAGGGCCGCCCUACGAGGGCAC  
 CCAGACCGCCAAGCUGAAGGUGACCAAGGGUGGCCCCUGCCCUUCGCCUJGGGACAUCUGUCCCUCA  
 GUUCAUGUACGGCUCCAAGGCCUACGUGAAGCACCCCGCCGACAUCGCCGACUACUJGAAGCUGUCCUU  
 CCCCAGGGGUUCAAGUGGGAGCGCGUGAUGAACUUCGAGGACGGCGGGCGUGGGUACCGUGACCCAGG  
 ACUCCUCCUGCAGGACGGCGAGUUAUCUACAAGGUGAAGCUGCGCGGCACCAACUJCCCUCCGACG  
 GCCCCGUAAUJGAGAAGAAGACCAUGGGCUGGGAGGCCUCCUCCGAGCGGAUGUACCCCGAGGACGGCG  
 CCCUGAAGGGCGAGAUCAAGCAGAGGCUGAAGCUGAAGGACGGCGGCCACUACGACGCUGAGGUCAAGA  
 CCACCUACAAGGCCAAGAAGCCCGUGCAGCUGCCCGGCCUACAACGUAACAUAAGUJGGACAUCAC  
 CUCCACAACGAGGACUACACCAUCGUGGAACAGUACGAACGCGCCGAGGGCCGCCACUCCACCGGCGG  
 CAUGGACGAGCUGUACAAGUAAAGCGGCCGCGACUCUAGAUAUAUAUCAGCCAUACCACAUUUGU-poly(A)  
 -3'



**mCh\_mRNA<sup>2 CP</sup>** (817 nt, **N=rTPT3<sup>CP</sup>**) or **mCh\_mRNA<sup>2 PM</sup>** (817 nt, **N=G**)  
(817 nt, mCherry protein coding region underlined)

5'-ARCA-GGGCUCAAGCUUCGAAUUCUGCAGUCGACGGUACCGCGGGGCCCGGGGAUCCACCGGUCGCCACC  
AUGGUGAGCAAGGGCGAGGAGGAUAACAUGGCCAUAUCAAGGAGUUAUGCGCUUCAAGGUGCACAUG  
GAGGGCUCGUGAACGGCCACGAGUUCGAGAUCGAGGGCGAGGGCGAGGGCCGCCCUACGAGGGCAC  
CCAGACCGCCAAGCUGAAGGUGACCAAGGGUGGCCCCUUGCCCUUCGCCUUGGGACAUCUCCUGUCCCUCA  
GUUCAUGUACGGCUCCAAGGCCUACGUGAAGCACCCCGCCGACAUCGCCGACUACUUGAAGCUGUCCUU  
CCCCGAGGGCUUCAAGUGGGAGCGCGUGAUGAACUUCGAGGACGGCGGGCGUGGGUACCGUGACCCAGG  
ACUCCUCCCUGCAGGACGGCGAGUUAUCAUCAAGGUGAAGCUGCGCGGCACCAACUUCGCCUCCGACG  
GCCCCGUAUUGCAGAAGAAGACCAUGGGCUGGGAGGCCUCCUCCGAGCGGAUGUACCCCGAGGACGGCG  
CCCUGAAGGGCGAGAUAAGCAGAGGCUGAAGCUGAAGGACGGCGGCCACUACGACGCUGAGGUCAAGA  
CCACCUACAAGGCCAAGAAGCCCGUGCAGCUGCCCGGCGCCUACAACGUAACAUCAAGUUGGACAUCAC  
CUCCACAACGAGGACUACACCAUCGUGGAACAGUACGAACCGCGCCGAGGGCCGCCACUCCACCGGCGG  
CAUGGACGAGCUGUACAAGUAAAGCGGCCCGGACUCUAGAUCAUANUCAGCCAUACCACNUUUGU-poly(A)  
-3'

**mCh\_mRNA<sup>WT</sup><sub>UTR 2</sub>** (817 nt, mCherry protein coding region underlined)

5'-ARCA-GGGCUCAAGCUUCGAAUUCUGCAGUCGACGGUACCGCGGGGCCCGGGGAUCCACCGGUCGCCACC  
AUGGUGAGCAAGGGCGAGGAGGAUAACAUGGCCAUAUCAAGGAGUUAUGCGCUUCAAGGUGCACAUG  
GAGGGCUCGUGAACGGCCACGAGUUCGAGAUCGAGGGCGAGGGCGAGGGCCGCCCUACGAGGGCAC  
CCAGACCGCCAAGCUGAAGGUGACCAAGGGUGGCCCCUUGCCCUUCGCCUUGGGACAUCUCCUGUCCCUCA  
GUUCAUGUACGGCUCCAAGGCCUACGUGAAGCACCCCGCCGACAUCGCCGACUACUUGAAGCUGUCCUU  
CCCCGAGGGCUUCAAGUGGGAGCGCGUGAUGAACUUCGAGGACGGCGGGCGUGGGUACCGUGACCCAGG  
ACUCCUCCCUGCAGGACGGCGAGUUAUCAUCAAGGUGAAGCUGCGCGGCACCAACUUCGCCUCCGACG  
GCCCCGUAUUGCAGAAGAAGACCAUGGGCUGGGAGGCCUCCUCCGAGCGGAUGUACCCCGAGGACGGCG  
CCCUGAAGGGCGAGAUAAGCAGAGGCUGAAGCUGAAGGACGGCGGCCACUACGACGCUGAGGUCAAGA  
CCACCUACAAGGCCAAGAAGCCCGUGCAGCUGCCCGGCGCCUACAACGUAACAUCAAGUUGGACAUCAC  
CUCCACAACGAGGACUACACCAUCGUGGAACAGUACGAACCGCGCCGAGGGCCGCCACUCCACCGGCGG  
CAUGGACGAGCUGUACAAGUAAAGCGGCCCGGACUCUAGAUCAUAGUUGUUGUUAACUUGUUUAU-poly(A)  
-3'

**mCh\_mRNA<sup>1 CP</sup><sub>UTR 2</sub>** (**N=rTPT3<sup>CP</sup>**) or **mCh\_mRNA<sup>1 PM</sup><sub>UTR 2</sub>** (**N=G**)  
(817 nt, mCherry protein coding region underlined)

5'-ARCA-GGGCUCAAGCUUCGAAUUCUGCAGUCGACGGUACCGCGGGGCCCGGGGAUCCACCGGUCGCCACC  
AUGGUGAGCAAGGGCGAGGAGGAUAACAUGGCCAUAUCAAGGAGUUAUGCGCUUCAAGGUGCACAUG  
GAGGGCUCGUGAACGGCCACGAGUUCGAGAUCGAGGGCGAGGGCGAGGGCCGCCCUACGAGGGCAC  
CCAGACCGCCAAGCUGAAGGUGACCAAGGGUGGCCCCUUGCCCUUCGCCUUGGGACAUCUCCUGUCCCUCA  
GUUCAUGUACGGCUCCAAGGCCUACGUGAAGCACCCCGCCGACAUCGCCGACUACUUGAAGCUGUCCUU  
CCCCGAGGGCUUCAAGUGGGAGCGCGUGAUGAACUUCGAGGACGGCGGGCGUGGGUACCGUGACCCAGG  
ACUCCUCCCUGCAGGACGGCGAGUUAUCAUCAAGGUGAAGCUGCGCGGCACCAACUUCGCCUCCGACG  
GCCCCGUAUUGCAGAAGAAGACCAUGGGCUGGGAGGCCUCCUCCGAGCGGAUGUACCCCGAGGACGGCG  
CCCUGAAGGGCGAGAUAAGCAGAGGCUGAAGCUGAAGGACGGCGGCCACUACGACGCUGAGGUCAAGA  
CCACCUACAAGGCCAAGAAGCCCGUGCAGCUGCCCGGCGCCUACAACGUAACAUCAAGUUGGACAUCAC  
CUCCACAACGAGGACUACACCAUCGUGGAACAGUACGAACCGCGCCGAGGGCCGCCACUCCACCGGCGG  
CAUGGACGAGCUGUACAAGUAAAGCGGCCCGGACUCUNGAUCAUAGUUGUUGUUAACUUGUUUAU-poly(A)  
-3'

**mCh\_mRNA<sup>2CP</sup><sub>UTR 2</sub> (N=rTPT3<sup>CP</sup>)** or **mCh\_mRNA<sup>2PM</sup><sub>UTR 2</sub> (N=G)**  
(817 nt, mCherry protein coding region underlined)

5'-ARCA-GGGCUCAAGCUUCGAAUUCUGCAGUCGACGGUACCGCGGGCCCGGGAUCCACCGGUCGCCACC  
AUGGUGAGCAAGGGCGAGGAGGAUAACAUGGCCAUCAUCAAGGAGUUCAUGCGCUUCAAGGUGCACAUG  
GAGGGCUCGUGAACGGCCACGAGUUCGAGAUCGAGGGCGAGGGCGAGGGCCGCCCUACGAGGGCAC  
CCAGACCGCCAAGCUGAAGGUGACCAAGGGUGGCCCCUGCCCUUCGCCUGGGACAUCUCCUGUCCCUCA  
GUUCAUGUACGGCUCCAAGGCCUACGUGAAGCACCCCGCCGACAUCCCGACUACUUGAAGCUGUCCUU  
CCCCGAGGGCUUCAAGUGGGAGCGCGUGAUGAACUUCGAGGACGGCGGGCGUGGUGACCGUGACCCAGG  
ACUCCUCCUGCAGGACGGCGAGUUCAUCUACAAGGUGAAGCUGCGCGGCACCAACUCCCCUCCGACG  
GCCCCGUAUUGCAGAAGAAGACCAUGGGCUGGGAGGCCUCCUCCGAGCGGAUGUACCCCGAGGACGGCG  
CCUGAAGGGCGAGAUAAGCAGAGGCUGAAGCUGAAGGACGGCGGCCACUACGACGCUGAGGUCAAGA  
CCACCUACAAGGCCAAGAAGCCCGUGCAGCUGCCCGGCGCCUACAACGUAACAUCAAGUUGGACAUCAC  
CUCCACAACGAGGACUACACCAUCGUGGAACAGUACGAACGCGCCGAGGGCCGCCACUCCACCGGCGG  
CAUGGACGAGCUGUACAAGUAAAGCGGCCGCGNCUCUAGAUCNUAGUUGUUGUUAACUUGUUUAU-poly(A  
)-3'

## Sanger sequencing of UBP modified and unmodified DNA

### Sanger sequencing

Purified PCR amplicons of **mCh\_DNA**, **mCh\_DNA<sup>1PM</sup>** and **mCh\_DNA<sup>2PM</sup>** and also **mCh\_DNA<sub>UTR 2</sub>**, **mCh\_DNA<sup>1PM</sup><sub>UTR 2</sub>** and **mCh\_DNA<sup>2PM</sup><sub>UTR 2</sub>** were submitted to Sanger sequencing (*GATC services, Eurofins Genomics*) using the self-designed **mCh\_Seq** sequencing primer and the **T7\_Seq** primer provided by the sequencing company. Purified, extended qPCR amplicons of **mCh\_ext-qPCR<sup>internal</sup>**, **mCh\_ext-qPCR<sup>3'-end</sup>**, **GAPDH\_ext-qPCR** and  **$\beta$ -Actin\_ext-qPCR** were submitted to Sanger sequencing (*GATC services, Eurofins Genomics*) using the self-designed **ext-qPCR\_FW** primer. Purified PCR amplicons of **mCh\_DNA<sup>1UBP</sup>** and **mCh\_DNA<sup>2UBP</sup>** were used with the BigDye<sup>TM</sup> Terminator v3.1 Cycle Sequencing Kit (*Applied Biosystems<sup>TM</sup>*) together with the **mCh\_FW** primer and then submitted to Sanger sequencing at the Cologne Center for Genomics.

### **pmCherry-N1 plasmid with AA-insertion**

(**AA-insertion** highlighted; mutated stop codon underlined; mCherry protein coding region underlined)

5'-aGCaGaGCTGGTTaGTGAaCCGTCAGATCCGCTAGCGCTACCGGaCTCAGATCTCGAGCTCAA  
GCTTCGAATTCTGCAGTCGACGGTACCGCGGGCCCGGGATCCACCGGTCGCCACCATGGTGAG  
CAAGGGCGAGGAGGATAACATGGCCATCATCAAGGAGTTCATGCGCTTCAAGGTGCACATGGAG  
GGCTCCGTGAACGGCCACGAGTTCGAGATCGAGGGCGAGGGCGAGGGCCGCCCTACGAGGG  
CACCCAGACCGCCAAGCTGAAGGTGACCAAGGGTGGCCCCCTGCCCTTCGCCTGGGACATCCT  
GTCCCCCTCAGTTCATGTACGGCTCCAAGGCCTACGTGAAGCACCCCGCCGACATCCCCGACTAC  
TTGAAGCTGTCCTTCCCCGAGGGCTTCAAGTGGGAGCGCGTGATGAACTTCGAGGACGGCGGC  
GTGGTGACCGTGACCCAGGACTCCTCCCTGCAGGACGGCGAGTTCATCTACAAGGTGAAGCTGC  
GCGGCACCAACTTCCCCTCCGACGGCCCCGTAATGCAGAAGAAGACCATGGGCTGGGAGGCCT  
CCTCCGAGCGGATGTACCCCGAGGACGGCGCCCTGAAGGGCGAGATCAAGCAGAGGCTGAAGC  
TGAAGGACGGCGGCCACTACGACGCTGAGGTCAAGACCACCTACAAGGCCAAGAAGCCCCTGC  
AGCTGCCCGGGCGCCTACAACGTCAACATCAAGTTGGACATCACCTCCCACAACGAGGACTACAC  
CATCGTGGAACAGTACGAACGCGCCGAGGGCCGCACTCCACCGGGCGGCATGGACGAGCTGTA  
CAAGTAAAGCGGCCGCGACTCTAGATCATAATCAGCCATACCACATTTGTAGAGGTTTTACTTGCT  
TTAAAAAaCCTCCCACACCTCCCCCTGAACCTGAAACATAAAATGAATGCAATTGTTGTTGTTAACT  
TGTTTATTGCAGCTTATAATGGTTACAAATAAAGCAATAGCATCACAAATTTACAAATAAAGCATT  
TTTTTCaCTGCATTCTAGTTgtGgTTtGTCCAAaCTCATCAATGTATCTTAAGGCGTAAaTTGTAAGCG  
TTAAAnaTTTTGTTAAaTTcnnGTTAAaTTTTTggtAAaTCAGcTcATTTTTtAaCCAAnaGgCCGAaTCGG  
cAAanTCCcTTanAAaCAAa-3'

### **mCh\_DNA<sup>WT</sup>**

(stop codon underlined; mCherry protein coding region underlined)

### **T7\_seq primer results:**

5'-antctgCagTCGAACGGTACCGCGGggCCCggGATCCACCGGTCGCCACCATGGTGAGCAAGGGC  
GAGGAGGATAACATGGCCATCATCAAGGAGTTCATGCGCTTCAAGGTGCACATGGAGGGCTCCG  
TGAACGGCCACGAGTTCGAGATCGAGGGCGAGGGCGAGGGCCGCCCTACGAGGGCACCCAG  
ACCGCCAAGCTGAAGGTGACCAAGGGTGGCCCCCTGCCCTTCGCCTGGGACATCCTGTCCCCCT  
CAGTTCATGTACGGCTCCAAGGCCTACGTGAAGCACCCCGCCGACATCCCCGACTACTTGAAGC  
TGTCCCTTCCCCGAGGGCTTCAAGTGGGAGCGCGTGATGAACTTCGAGGACGGCGGCCTGGTGA  
CCGTGACCCAGGACTCCTCCCTGCAGGACGGCGAGTTCATCTACAAGGTGAAGCTGCGCGGCA  
CCAACCTTCCCCTCCGACGGCCCCGTAATGCAGAAGAAGACCATGGGCTGGGAGGCCTCCTCCG  
AGCGGATGTACCCCGAGGACGGCGCCCTGAAGGGCGAGATCAAGCAGAGGCTGAAGCTGAAGC

ACGGCGGCCACTACGACGCTGAGGTCAAGACCACCTACAAGGCCAAGAAGCCCGTGCAGCTGC  
CCGGCGCCTACAACGTCAACATCAAGTTGGACATCACCTCCCACAACGAGGACTACACCATCGT  
GGAACAGTACGAACGCGCCGAGGGCCGCCACTCCACCGGCGGCATGGACGAGCTGTACAAGTA  
AAGCGGCCGCGACTCTAGATCATAATCAGCCAtaCCc-3'

**mCh\_seq primer results:**

5'-atGgnnGAgCTGTACaAGTAAAGCGGCCGCGACTCTAGATCATAATCAGCCATACCACATTT-3'

**mCh\_DNA<sup>1</sup>PM**

(stop codon underlined; mCherry protein coding region underlined, mutated base in red)

**T7\_seq primer results:**

GngTCGaangGtcCGCGGGGCCCGGGATcACCGGTCGCCACCATGGTGAGCAAGGGCGAGGAGG  
ATAACATGGCCATCATCAAGGAGTTCATGCGCTTCAAGGTGCACATGGAGGGCTCCGTGAACGG  
CCACGAGTTCGAGATCGAGGGCGAGGGCGAGGGCCGCCCTACGAGGGCACCCAGACCGCCA  
AGCTGAAGGTGACCAAGGGTGGCCCCCTGCCCTTCGCCTGGGACATCCTGTCCCCTCAGTTCAT  
GTACGGCTCCAAGGCCTACGTGAAGCACCCCGCCGACATCCCCGACTACTTGAAGCTGTCCTTC  
CCCGAGGGCTTCAAGTGGGAGCGCGTGATGAACTTCGAGGACGGCGGCGTGGTGACCGTGACC  
CAGGACTCCTCCCTGCAGGACGGCGAGTTCATCTACAAGGTGAAGCTGCGCGGCACCAACTTCC  
CCTCCGACGGCCCCGTAATGCAGAAGAAGACCATGGGCTGGGAGGCCTCCTCCGAGCGGATGT  
ACCCCGAGGACGGCGCCCTGAAGGGCGAGATCAAGCAGAGGCTGAAGCTGAAGGACGGCGGC  
CACTACGACGCTGAGGTCAAGACCACCTACAAGGCCAAGAAGCCCGTGCAGCTGCCCGGCGCC  
TACAACGTCAACATCAAGTTGGACATCACCTCCCACAACGAGGACTACACCATCGTGGAACAGTA  
CGAACGCGCCGAGGGCCGCCACTCCACCGGCGGCATGGACGAGCTGTACAAGTAAAGCGGCC  
GCGACTCTAGATCATAATCAGc

**mCh\_seq primer results:**

cgaagctgtacaagtaagcgccgcgactctagatcataatcagccgtaccacatt

**mCh\_DNA<sup>2</sup>PM**

(stop codon underlined; mCherry protein coding region underlined, mutated bases in red)

**T7\_seq primer results:**

gTcgaacGGtnnCGCGGGgCCCGGGancCACCGGtncGCCACCATGGTGAGCAAGGGCGAGGAGGAT  
AACATGGCCATCATCAAGGAGTTCATGCGCTTCAAGGTGCACATGGAGGGCTCCGTGAACGGCC  
ACGAGTTCGAGATCGAGGGCGAGGGCGAGGGCCGCCCTACGAGGGCACCCAGACCGCCAAG  
CTGAAGGTGACCAAGGGTGGCCCCCTGCCCTTCGCCTGGGACATCCTGTCCCCTCAGTTCATGT  
ACGGCTCCAAGGCCTACGTGAAGCACCCCGCCGACATCCCCGACTACTTGAAGCTGTCCTTCCC  
CGAGGGCTTCAAGTGGGAGCGCGTGATGAACTTCGAGGACGGCGGCGTGGTGACCGTGACCCA  
GGACTCCTCCCTGCAGGACGGCGAGTTCATCTACAAGGTGAAGCTGCGCGGCACCAACTTCCC  
TCCGACGGCCCCGTAATGCAGAAGAAGACCATGGGCTGGGAGGCCTCCTCCGAGCGGATGTAC  
CCCGAGGACGGCGCCCTGAAGGGCGAGATCAAGCAGAGGCTGAAGCTGAAGGACGGCGGCCA  
CTACGACGCTGAGGTCAAGACCACCTACAAGGCCAAGAAGCCCGTGCAGCTGCCCGGCGCCTA  
CAACGTCAACATCAAGTTGGACATCACCTCCCACAACGAGGACTACACCATCGTGGAACAGTACG  
AACGCGCCGAGGGCCGCCACTCCACCGGCGGCATGGACGAGCTGTACAAGTAAAGCGGCCGC  
GACTCTAGATCATAgTCAGct

**mCh\_seq primer results:**

acgagctgtacaagtaagcgccgcgactctagatcatagtcagccataccacgttgt

**mCh\_DNA<sup>WT</sup><sub>UTR 2</sub>**

(stop codon underlined; mCherry protein coding region underlined)

**T7\_seq primer results:**

gTCGaangGtaCnGCGGGGCCCCGgnatCCACCGGTCGCCACCATGGTGAGCAAGGGCGAGGAGGA  
TAACATGGCCATCATCAAGGAGTTCATGCGCTTCAAGGTGCACATGGAGGGCTCCGTGAACGGC  
CACGAGTTCGAGATCGAGGGCGAGGGCGAGGGCCGCCCTACGAGGGCACCCAGACCGCCAA  
GCTGAAGGTGACCAAGGGTGGCCCCCTGCCCTTCGCCTGGGACATCCTGTCCCCTCAGTTCATG  
TACGGCTCCAAGGCCTACGTGAAGCACCCCGCCGACATCCCCGACTACTTGAAGCTGTCTTCC  
CCGAGGGCTTCAAGTGGGAGCGCGTGATGAACTTCGAGGACGGCGGCGTGGTGACCGTGACCC  
AGGACTCCTCCCTGCAGGACGGCGAGTTCATCTACAAGGTGAAGCTGCGCGGCACCAACTTCCC  
CTCCGACGGCCCCGTAATGCAGAAGAAGACCATGGGCTGGGAGGCCTCCTCCGAGCGGATGTA  
CCCCGAGGACGGCGCCCTGAAGGGCGAGATCAAGCAGAGGCTGAAGCTGAAGGACGGCGGCC  
ACTACGACGCTGAGGTCAAGACCACCTACAAGGCCAAGAAGCCCGTGCAGCTGCCCGGCGCCT  
ACAACGTCAACATCAAGTTGGACATCACCTCCCACAACGAGGACTACACCATCGTGGAACAGTAC  
GAACGCGCCGAGGGCCGCCACTCCACCGGCGGCATGGACGAGCTGTACAAGTAAAGCGGCCG  
CGACTCTAGATCATAGTTGTTGTAcctTtnnttt

**mCh\_seq primer results:**

tGgmnGAgCTGTaCaAGTAAAGCGGCCGCGACTCTAGATCATAGTTGTTGTTAACTTGT

**mCh\_DNA<sup>1PM</sup><sub>UTR 2</sub>**

(stop codon underlined; mCherry protein coding region underlined, mutated base in red)

**T7\_seq primer results:**

GcAgTCGaacGgGtaccGCGGGGCCCCggGgatCCACCGGTCGCCACCATGGTGAGCAAGGGCGAGG  
AGGATAACATGGCCATCATCAAGGAGTTCATGCGCTTCAAGGTGCACATGGAGGGCTCCGTGAA  
CGGCCACGAGTTCGAGATCGAGGGCGAGGGCGAGGGCCGCCCTACGAGGGCACCCAGACCG  
CCAAGCTGAAGGTGACCAAGGGTGGCCCCCTGCCCTTCGCCTGGGACATCCTGTCCCCTCAGTT  
CATGTACGGCTCCAAGGCCTACGTGAAGCACCCCGCCGACATCCCCGACTACTTGAAGCTGTCC  
TTCCCCGAGGGCTTCAAGTGGGAGCGCGTGATGAACTTCGAGGACGGCGGCGTGGTGACCGTG  
ACCCAGGACTCCTCCCTGCAGGACGGCGAGTTCATCTACAAGGTGAAGCTGCGCGGCACCAACT  
TCCCCTCCGACGGCCCCGTAATGCAGAAGAAGACCATGGGCTGGGAGGCCTCCTCCGAGCGGA  
TGTACCCCGAGGACGGCGCCCTGAAGGGCGAGATCAAGCAGAGGCTGAAGCTGAAGGACGGCG  
GCCACTACGACGCTGAGGTCAAGACCACCTACAAGGCCAAGAAGCCCGTGCAGCTGCCCGGCG  
CCTACAACGTCAACATCAAGTTGGACATCACCTCCCACAACGAGGACTACACCATCGTGGAACAG  
TACGAACGCGCCGAGGGCCGCCACTCCACCGGCGGCATGGACGAGCTGTACAAGTAAAGCGGC  
CGGACTCTGATCATAGTTGTTGTA

**mCh\_seq primer results:**

gcatggacgagctgtacaagttaagcgccgactctgatcatagttgttgaactgtttat

**mCh\_DNA<sup>2PM</sup><sub>UTR 2</sub>**

(stop codon underlined; mCherry protein coding region underlined, mutated bases in red)

**T7\_seq primer results:**

gngTcgaacgGtncGCGGGCCCCGGGATcCaCCGgnccGCCACCATGGTGAGCAAGGGCGAGGAGGAT  
AACATGGCCATCATCAAGGAGTTCATGCGCTTCAAGGTGCACATGGAGGGCTCCGTGAACGGCC  
ACGAGTTCGAGATCGAGGGCGAGGGCGAGGGCCGCCCTACGAGGGCACCCAGACCGCCAAG  
CTGAAGGTGACCAAGGGTGGCCCCCTGCCCTTCGCCTGGGACATCCTGTCCCCTCAGTTCATGT  
ACGGCTCCAAGGCCTACGTGAAGCACCCCGCCGACATCCCCGACTACTTGAAGCTGTCTTCCC  
CGAGGGCTTCAAGTGGGAGCGCGTGATGAACTTCGAGGACGGCGGCGTGGTGACCGTGACCCA

GGACTCCTCCCTGCAGGACGGCGAGTTCATCTACAAGGTGAAGCTGCGCGGCACCAACTTCCCC  
TCCGACGGCCCCGTAATGCAGAAGAAGACCATGGGCTGGGAGGCCTCCTCCGAGCGGATGTAC  
CCCGAGGACGGCGCCCTGAAGGGCGAGATCAAGCAGAGGCTGAAGCTGAAGGACGGCGGCCA  
CTACGACGCTGAGGTCAAGACCACCTACAAGGCCAAGAAGCCCGTGCAGCTGCCCGGCGCCTA  
CAACGTCAACATCAAGTTGGACATCACCTCCCACAACGAGGACTACACCATCGTGGAACAGTACG  
AACGCGCCGAGGGCCGCCACTCCACCGGCGGCATGGACGAGCTGTACAAGTAAAGCGGCCGC  
GGCTCTAGATCGTAGTTGTGTAAannTttttT

**mCh\_seq primer results:**

acgaagctgtacaagtaaagcgccgcgctctagatcgtagtgtgttaactgttta

**mCh\_DNA<sup>1</sup>UBP**

(stop codon underlined; mCherry protein coding region underlined, unnatural base position in red)

nnnnnnnnCGCGGnnnnGGnnCnnCCGGTCGCCACCATGGTGAGCAAGGGCGAGGAGGATAannTG  
GCCATCATCAAGGAGTTCATGCGCTTCAAGGTGCACATGGAGGGCTCCGTGAACGGCCACGAGT  
TCGAGATCGAGGGCGAGGGCGAGGGCCGCCCTACGAGGGCACCCAGACCGCCAAGCTGAAG  
GTGACCAAGGGTGGCCCCCTGCCCTTCGCCTGGGACATCCTGTCCCCTCAGTTCATGTACGGCT  
CCAAGGCCTACGTGAAGCACCCCGCCGACATCCCCGACTACTTGAAGCTGTCTTCCCCGAGGG  
CTTCAAGTGGGAGCGCGTGATGAACTTCGAGGACGGCGGCGTGTTGACCGTGACCCAGGACTC  
CTCCCTGCAGGACGGCGAGTTCATCTACAAGGTGAAGCTGCGCGGCACCAACTTCCCCTCCGAC  
GGCCCCGTAATGCAGAAGAAGACCATGGGCTGGGAGGCCTCCTCCGAGCGGATGTACCCCGAG  
GACGGCGCCCTGAAGGGCGAGATCAAGCAGAGGCTGAAGCTGAAGGACGGCGGCCACTACGAC  
GCTGAnGTCAAGACCACCTACAAGGCCAAGAAGCCCGTGCAGCTGCCCGGCGCCTACAACGTCA  
ACATCAAGTTGGACATCACCTCCCACAACGAGGACTACACCATCGTGnAACAGTACGAACGCGCC  
GAGGGCCGCCACTCCACCGGCGGCATGGACGAGCTGTACAAGTAAAnCGnnCGCGACTCTnnnnn  
nnnAATCAGCCnnnnnnn

**mCh\_DNA<sup>2</sup>UBP**

(stop codon underlined; mCherry protein coding region underlined, unnatural base position in red)

nnnnnnnnnnnnnnGnnCCnCCGGTCGCCnCCATGGTGAGCAAGGGCGAGGAGGATAACATGGCCATC  
ATCAAGGAGTTCATGCGCTTCAAGGTGCACATGGAGGGCTCCGTGAACGGCCACGAGTTCGAGA  
TCGAGGGCGAGGGCGAGGGCCGCCCTACGAGGGCACCCAGACCGCCAAGCTGAAGGTGACC  
AAGGGTGGCCCCCTGCCCTTCGCCTGGGACATCCTGTCCCCTCAGTTCATGTACGGCTCCAAGG  
CCTACGTGAAGCACCCCGCCGACATCCCCGACTACTTGAAGCTGTCTTCCCCGAGGGCTTCAA  
GTGGGAGCGCGTGATGAACTTCGAGGACGGCGGCGTGTTGACCGTGACCCAGGACTCCTCCCT  
GCAGGACGGCGAGTTCATCTACAAGGTGAAGCTGCGCGGCACCAACTTCCCCTCCGACGGCCC  
CGTAATGCAGAAGAAGACCATGGGCTGGGAGGCCTCCTCCGAGCGGATGTACCCCGAGGACGG  
CGCCCTGAAGGGCGAGATCAAGCAGAnGCTGAAGCTGAAGGACGGCGGCCACTACGACGCTGA  
nGTCAAGACCACCTACAAGGCCAAGAAGCCCGTGCAGCTGCCCGGCGCCTACAACGTCAACATC  
AAGTTGGACATCACCTCCCACnACGAGGACTACACCATCGTGGAACAGTACGAACGCGCCGAGG  
GCCGCCACTCCACCGGCGGCATGGACGAnCnGTACAnGTAAAGCGnCCCGACTCTnGATCAnAn  
nnnnnnCnnnCnnnnnn

**mCh\_ext-qPCR<sup>internal</sup>**

5'-tTGgcagTCtAGGCGAtCGCgATGGCCTGAGTCTAGAGCTCGAgTTcnaAgCTtAagACGTCaGCTGC  
CATCCCgActACTTGAAnCTGtCCTTCCCcgAgGgCTcaagTGGgAaCgCGTGATGAACTTCgAGGACG  
GCGGcGtGgTGACCGTGACCCAGGACTCctCCCTGCAGGACGGCaAGTTCATCTACaAGGTGA-3'

### mCh\_ext-qPCR<sup>3'-end</sup>

5'-aGGCGAtcGcGATGGCCTGAGTCTAgAGCTCGAGTTCGAAGCTtAagACGTCngCTGCCATATCAg  
GTTGGACaTcCaCCTCCcAcAacGAGGACTACaCCaTcgtGgAacAGTACgAAcGCgCCgAGGGCCgCCa  
cTCCaCCGGcGGcatGgacaAgCTGTACAAGTAAagcG-3'

### GAPDH\_ext-qPCR

5'-tTGgCAGTCTAGGCGATCGcgATGGCCTGAGTCTAGAGCTCgAgTTCgAagCTtAAGACGTCagCT  
GCcaTAgCctCAagATCATCAgCaaTGCctCctGcaCCaCCAactGcTTAAcCaCCcctgAnnnAGGTcATCCa  
TGACaaCTTTGgTATCgtGgAAGGACTCatGAccaCagtcCa-3'

### β-Actin\_ext-qPCR

5'-tcaCTTGGCAGTCTAGGCGATCGCGATGGCCTGAGTCTAGAGCTCGAGTTCGAAGCTTAAgACg  
TCAgCTGCcatGGTCATCACCATTGgcAATGAgCGGTTCCgctGCCcgGaGGCACTCTTCCagCCTTCC  
TTCCgGGGcATGGAaTcctGtGgCATCcacnaaACtaCcTTCAacTCcnTCatgaagTGtga -3'

## cNLS Mapper results for mCherry protein sequence

For prediction of nuclear localization signals (NLS) specific to the importin  $\alpha\beta$  pathway<sup>2</sup> the cNLS Mapper tool was used ([http://nls-mapper.iab.keio.ac.jp/cgi-bin/NLS\\_Mapper\\_form.cgi](http://nls-mapper.iab.keio.ac.jp/cgi-bin/NLS_Mapper_form.cgi)). The result for the mCherry protein coding amino acid (aa) sequence is displayed in Supplementary Figure 33. The cut-off score for prediction was set to 3.0 as a protein with scores of 3, 4 and 5 (scale range from 1 to 10) is localized to both the nucleus and the cytoplasm. It was searched for bipartite NLS with a long linker (13-20 aa) throughout the entire region. Two predicted bipartite NLS were found with a score of 3 and 3.3, as well as three predicted bipartite NLS were found with scores of 4.1, 4.3 and 4.5.

### cNLS Mapper Result

| Predicted NLSs in query sequence                       |     |
|--------------------------------------------------------|-----|
| MVSKGEEDNMAI I KEFMRPKVHMEGSVNGHEFE IE EGEGERPYECTQTAK | 50  |
| LKVTKGGPLPFAWD I LSPQFMYGSKAYVKHPAD I PDYLKLSFPEGFKWER | 100 |
| VMNFEDGGVVTVTQDSSLQDGEFIYKVKLRGTFNFPDGPVMQKKTMGWEA     | 150 |
| SSERMPEDGALKGEI KQRLKLDGGHYDAEVKTTYKAKKPVQLPGAYNV      | 200 |
| NIKLDITSHNEDYTI VEQYERAERHSTGGMDELYK                   | 236 |

  

| Predicted monopartite NLS |          |       |
|---------------------------|----------|-------|
| Pos.                      | Sequence | Score |
|                           |          |       |

  

| Predicted bipartite NLS |                                 |       |
|-------------------------|---------------------------------|-------|
| Pos.                    | Sequence                        | Score |
| 51                      | LKVTKGGPLPFAWD I LSPQFMYGSKAYVK | 3     |
| 74                      | SKAYVKHPAD I PDYLKLSFPEGFKWERV  | 4.1   |
| 142                     | QKKTMGWEASSERMPEDGALKGEI KQRLK  | 3.3   |
| 163                     | KGEI KQRLKLDGGHYDAEVKTTYKAKKP   | 4.3   |
| 163                     | KGEI KQRLKLDGGHYDAEVKTTYKAKKPV  | 4.5   |

Supplementary Figure 35. cNLS mapper results for mCherry protein amino acid sequence.

## References

- 1 L. Li *et al.*, Natural-like replication of an unnatural base pair for the expansion of the genetic alphabet and biotechnology applications, *J. Am. Chem. Soc.*, 2014, **136**, 826–829.
- 2 S. Kosugi *et al.*, Systematic identification of cell cycle-dependent yeast nucleocytoplasmic shuttling proteins by prediction of composite motifs, *Proc. Natl. Acad. Sci. U. S. A.*, 2009, **106**, 10171–10176.
